# Supplementary material for: Identification of Molecular Subtypes and Prognostic Characteristics of Adrenocortical Carcinoma Based on Unsupervised Clustering
Source: Int J Mol Sci. 2023 Oct 23;24(20):15465. doi: 10.3390/ijms242015465 (PMC10607826; doi:10.3390/ijms242015465)
Supplement: Supplementary file 1 [file ijms-24-15465-s001.zip › Supplementary Tables.xlsx]

## Sheet: Table S1
TCGA-ACC clustering results
Sample	Subtype
TCGA-OR-A5JP-01A	Subtype 1
TCGA-OR-A5JG-01A	Subtype 1
TCGA-OR-A5LG-01A	Subtype 1
TCGA-OR-A5JR-01A	Subtype 2
TCGA-OR-A5KU-01A	Subtype 1
TCGA-OR-A5LS-01A	Subtype 1
TCGA-OR-A5L9-01A	Subtype 2
TCGA-OR-A5JQ-01A	Subtype 2
TCGA-OR-A5K4-01A	Subtype 2
TCGA-OR-A5JL-01A	Subtype 2
TCGA-OR-A5LC-01A	Subtype 1
TCGA-OR-A5K2-01A	Subtype 1
TCGA-P6-A5OG-01A	Subtype 1
TCGA-OR-A5JW-01A	Subtype 1
TCGA-OR-A5KO-01A	Subtype 1
TCGA-OR-A5J8-01A	Subtype 1
TCGA-PA-A5YG-01A	Subtype 2
TCGA-OR-A5KV-01A	Subtype 1
TCGA-OR-A5L4-01A	Subtype 2
TCGA-OR-A5KX-01A	Subtype 1
TCGA-OR-A5L8-01A	Subtype 1
TCGA-OR-A5JO-01A	Subtype 2
TCGA-OR-A5JA-01A	Subtype 2
TCGA-OR-A5LO-01A	Subtype 1
TCGA-OR-A5JM-01A	Subtype 1
TCGA-OR-A5JV-01A	Subtype 2
TCGA-OR-A5JB-01A	Subtype 1
TCGA-OR-A5LA-01A	Subtype 2
TCGA-OR-A5JE-01A	Subtype 1
TCGA-OR-A5JZ-01A	Subtype 2
TCGA-OR-A5KT-01A	Subtype 1
TCGA-OR-A5KZ-01A	Subtype 1
TCGA-OR-A5LJ-01A	Subtype 1
TCGA-OR-A5LB-01A	Subtype 1
TCGA-OR-A5LT-01A	Subtype 1
TCGA-OR-A5LD-01A	Subtype 1
TCGA-OR-A5J2-01A	Subtype 1
TCGA-PK-A5HB-01A	Subtype 1
TCGA-OR-A5JS-01A	Subtype 1
TCGA-OR-A5K6-01A	Subtype 1
TCGA-OR-A5JY-01A	Subtype 2
TCGA-OR-A5JT-01A	Subtype 2
TCGA-PK-A5H8-01A	Subtype 1
TCGA-OR-A5JX-01A	Subtype 1
TCGA-OR-A5LK-01A	Subtype 2
TCGA-P6-A5OF-01A	Subtype 1
TCGA-OR-A5JI-01A	Subtype 1
TCGA-OR-A5K5-01A	Subtype 1
TCGA-OR-A5JC-01A	Subtype 2
TCGA-OR-A5KW-01A	Subtype 1
TCGA-OR-A5JJ-01A	Subtype 1
TCGA-OR-A5JD-01A	Subtype 2
TCGA-OR-A5LM-01A	Subtype 2
TCGA-PK-A5HA-01A	Subtype 2
TCGA-OR-A5JF-01A	Subtype 1
TCGA-OR-A5LH-01A	Subtype 2
TCGA-OR-A5K1-01A	Subtype 2
TCGA-OR-A5LN-01A	Subtype 2
TCGA-OR-A5LE-01A	Subtype 1
TCGA-OR-A5L3-01A	Subtype 1
TCGA-OU-A5PI-01A	Subtype 1
TCGA-OR-A5K8-01A	Subtype 1
TCGA-OR-A5K0-01A	Subtype 2
TCGA-OR-A5KY-01A	Subtype 1
TCGA-OR-A5J9-01A	Subtype 1
TCGA-OR-A5J1-01A	Subtype 1
TCGA-OR-A5J5-01A	Subtype 1
TCGA-OR-A5L6-01A	Subtype 2
TCGA-OR-A5LP-01A	Subtype 2
TCGA-OR-A5K9-01A	Subtype 1
TCGA-OR-A5J7-01A	Subtype 1
TCGA-PK-A5H9-01A	Subtype 2
TCGA-OR-A5LR-01A	Subtype 2
TCGA-OR-A5JK-01A	Subtype 2
TCGA-OR-A5J6-01A	Subtype 1
TCGA-OR-A5LL-01A	Subtype 1
TCGA-OR-A5K3-01A	Subtype 2
TCGA-OR-A5J3-01A	Subtype 1
TCGA-OR-A5L5-01A	Subtype 2

## Sheet: Table S2
All DGEs between Subtype 1 and Subtype 2 (n=340)
gene	baseMean	log2FoldChange	lfcSE	stat	pvalue	padj	Group
HLA-E	24402.1	1.58916	0.175051	9.07826	1.10327e-19	1.10135e-16	Up
HLA-B	58257.8	1.86017	0.214766	8.66138	4.66084e-18	3.27415e-15	Up
PROK1	684.724	5.9721	0.726202	8.22374	1.97247e-16	1.01113e-13	Up
SLPI	6863.43	5.20587	0.652805	7.97463	1.5284e-15	6.58844e-13	Up
B2M	81723.9	1.42562	0.181398	7.85908	3.86963e-15	1.44494e-12	Up
HLA-F	2515.57	1.77805	0.2278	7.80531	5.93559e-15	1.94104e-12	Up
CD79A	75.9712	3.06045	0.415451	7.36657	1.7507e-13	3.73097e-11	Up
FABP3	10004.1	2.78048	0.384218	7.23673	4.59648e-13	8.5472e-11	Up
HLA-C	36793.5	1.40225	0.198942	7.04853	1.80816e-12	2.67932e-10	Up
HLA-A	51960.8	1.39975	0.213254	6.56376	5.24663e-11	5.23752e-09	Up
SSTR1	221.964	3.52515	0.541113	6.51463	7.28708e-11	6.94543e-09	Up
PPARD	2916.51	1.08723	0.180121	6.03612	1.57862e-09	9.32763e-08	Up
HLA-DPA1	5831.82	1.82122	0.303035	6.00993	1.85602e-09	1.07326e-07	Up
HGF	571.661	2.70712	0.458153	5.90877	3.44667e-09	1.82097e-07	Up
CX3CR1	215.376	2.46062	0.418595	5.87829	4.14527e-09	2.11516e-07	Up
HLA-DPB1	4343.01	1.76446	0.302189	5.83893	5.25378e-09	2.54205e-07	Up
CD74	42232.9	1.83896	0.317516	5.79172	6.96685e-09	3.24669e-07	Up
IL33	303.283	1.59955	0.276463	5.78578	7.21752e-09	3.33204e-07	Up
HLA-DOA	396.929	2.03991	0.357667	5.70338	1.17453e-08	5.05155e-07	Up
SH2D1B	8.89342	1.7836	0.319316	5.58567	2.32806e-08	8.76147e-07	Up
CYSLTR1	52.5939	1.63552	0.292807	5.58566	2.32814e-08	8.76147e-07	Up
PCSK2	145.187	3.75868	0.673756	5.5787	2.42325e-08	9.01212e-07	Up
SORT1	2649.52	1.08404	0.195954	5.53212	3.16383e-08	1.14959e-06	Up
HLA-DQA1	1021.05	1.88669	0.341624	5.52273	3.33777e-08	1.19674e-06	Up
PSMB8	2786.14	1.0362	0.192658	5.37843	7.514e-08	2.37927e-06	Up
HLA-DRA	11298.4	1.70703	0.317572	5.37525	7.64759e-08	2.4095e-06	Up
FABP2	196.356	2.88523	0.538616	5.35675	8.47317e-08	2.62365e-06	Up
PIK3CG	39.43	1.51888	0.283833	5.35131	8.73177e-08	2.69294e-06	Up
SEMG1	742.231	4.07823	0.772236	5.28107	1.28431e-07	3.72471e-06	Up
DUOX2	152.874	3.13958	0.60138	5.22063	1.78317e-07	4.87339e-06	Up
RARB	263.069	1.42519	0.273175	5.21714	1.81702e-07	4.95165e-06	Up
CYSLTR2	1543.1	2.40259	0.460832	5.21359	1.85217e-07	5.03297e-06	Up
PTPRC	354.177	1.75418	0.341982	5.12945	2.90585e-07	7.27114e-06	Up
TGFA	133.122	1.91276	0.373258	5.12449	2.98338e-07	7.4553e-06	Up
ENDOU	56.3074	1.9115	0.37484	5.09952	3.40516e-07	8.35511e-06	Up
XCR1	7.15199	2.56656	0.51185	5.01428	5.32314e-07	1.23428e-05	Up
NCR3	6.69504	2.03472	0.408118	4.98562	6.17639e-07	1.40457e-05	Up
HLA-DMA	2066.26	1.31946	0.265571	4.96838	6.75134e-07	1.50473e-05	Up
GBP2	3477.74	1.6419	0.332473	4.93845	7.87448e-07	1.70497e-05	Up
TRIM22	755.467	1.42252	0.291776	4.87541	1.08585e-06	2.21402e-05	Up
HLA-G	168.403	1.38775	0.287603	4.82524	1.39836e-06	2.73148e-05	Up
A2M	19107.7	1.05615	0.219294	4.81613	1.46369e-06	2.83862e-05	Up
TNFSF8	25.5003	1.66631	0.349407	4.76897	1.85173e-06	3.42317e-05	Up
CD40LG	7.25577	2.34429	0.492808	4.75701	1.96485e-06	3.5903e-05	Up
CETP	207.889	1.5941	0.335853	4.74643	2.07041e-06	3.73995e-05	Up
CALCR	8.24702	2.34551	0.4974	4.71554	2.4107e-06	4.22586e-05	Up
REG3G	384.317	4.2058	0.891943	4.71532	2.41332e-06	4.22655e-05	Up
SDC3	24277.9	1.0922	0.231709	4.71366	2.43309e-06	4.2494e-05	Up
MET	487.535	1.5219	0.324026	4.69686	2.64193e-06	4.55127e-05	Up
INPP5D	524.082	1.17255	0.250412	4.6825	2.83392e-06	4.81208e-05	Up
EGF	100.99	2.02612	0.440609	4.59845	4.25645e-06	6.78991e-05	Up
BTK	126.211	1.43542	0.314321	4.56673	4.95385e-06	7.70793e-05	Up
CIITA	421.882	1.20933	0.266762	4.53335	5.80556e-06	8.80169e-05	Up
ITGAL	269.609	1.31046	0.289634	4.52454	6.05281e-06	9.1114e-05	Up
HLA-DQB1	2103.32	1.56843	0.347549	4.51282	6.3971e-06	9.46441e-05	Up
AZGP1	15.9888	2.44558	0.542694	4.50637	6.59474e-06	9.6813e-05	Up
IL2RB	181.082	1.65822	0.369875	4.48319	7.3536e-06	0.000105583	Up
CCL17	6.21107	1.75332	0.391494	4.47854	7.51536e-06	0.000107365	Up
IL16	237.472	1.22343	0.275083	4.4475	8.6877e-06	0.000121788	Up
S100A2	36.5492	1.15823	0.261548	4.42838	9.49443e-06	0.00013135	Up
KITLG	1051.59	1.36709	0.311172	4.39337	1.11606e-05	0.000149599	Up
SYK	331	1.47082	0.335666	4.3818	1.17701e-05	0.000156223	Up
PRLR	7468.93	2.05451	0.474131	4.3332	1.46955e-05	0.000185449	Up
CCL2	399.563	1.6334	0.377701	4.3246	1.52809e-05	0.000191688	Up
VAV3	152.243	1.387	0.322233	4.30434	1.67482e-05	0.000206141	Up
CCR5	78.1798	1.74143	0.404953	4.30033	1.70546e-05	0.000209369	Up
SDC4	7564.09	1.0577	0.2473	4.27699	1.89441e-05	0.000228716	Up
CD1C	23.3396	2.56804	0.601601	4.26867	1.96644e-05	0.000235731	Up
TEK	230.706	1.1577	0.273513	4.2327	2.30903e-05	0.000269344	Up
EBI3	163.176	1.32246	0.31375	4.21502	2.49758e-05	0.000287449	Up
CHGB	22487.8	1.68235	0.400122	4.20459	2.61555e-05	0.000299671	Up
PRKCA	4413.06	1.41091	0.338342	4.17006	3.04514e-05	0.000338157	Up
ITK	41.2762	1.75786	0.427153	4.11528	3.86701e-05	0.000411823	Up
CCL7	4.06353	2.50258	0.609584	4.10539	4.03636e-05	0.00042603	Up
RORC	448.143	2.7694	0.676172	4.09571	4.20884e-05	0.000441776	Up
OLR1	240.619	2.06944	0.51445	4.02262	5.75532e-05	0.000565309	Up
ANGPT1	242.691	1.1258	0.281919	3.99335	6.51453e-05	0.000624993	Up
CSF2RA	160.234	1.33318	0.335089	3.9786	6.93215e-05	0.000656098	Up
NRG1	33.0992	2.15933	0.543021	3.97652	6.99302e-05	0.000660521	Up
PTGDR	16.7934	1.82228	0.459652	3.96448	7.35558e-05	0.000689295	Up
SLC40A1	10485.9	1.56689	0.395619	3.96062	7.47568e-05	0.000698135	Up
LCN2	435.136	2.06157	0.520847	3.95811	7.55451e-05	0.000703764	Up
SH3BP2	1377.54	1.14403	0.289472	3.95212	7.74613e-05	0.000719164	Up
CCL19	60.9911	3.04875	0.771418	3.95214	7.74544e-05	0.000719164	Up
AGT	1330.67	1.42235	0.362579	3.92286	8.75045e-05	0.000792597	Up
IL10RA	481.072	1.31599	0.336331	3.91277	9.12415e-05	0.000821347	Up
TNFSF18	9.34469	1.51699	0.392093	3.86896	0.000109301	0.000942326	Up
CSF2RB	114.585	1.25263	0.324162	3.86421	0.000111451	0.000956941	Up
NPY	4.85841	4.5584	1.18447	3.84848	0.000118853	0.00100863	Up
CTSG	6.46117	2.95031	0.768471	3.8392	0.000123435	0.00103685	Up
CD48	125.596	1.4536	0.378806	3.83733	0.00012438	0.00104346	Up
TLR4	380.847	1.02913	0.26836	3.83489	0.000125623	0.00105196	Up
TLR7	79.9924	1.51255	0.39456	3.8335	0.000126331	0.00105654	Up
IGF1	54.8701	1.61699	0.424143	3.81236	0.000137644	0.00112919	Up
SH2D1A	26.8762	1.81903	0.480092	3.78893	0.000151298	0.00121699	Up
LCP2	427.503	1.06152	0.2804	3.78572	0.000153265	0.00123124	Up
CD247	62.125	1.31972	0.350886	3.76112	0.000169152	0.00132849	Up
CSF1	2110.3	1.35732	0.362509	3.74423	0.00018095	0.00140028	Up
LTF	32.5171	1.40845	0.376409	3.7418	0.000182709	0.00141043	Up
CR2	5.99214	2.57736	0.691162	3.72902	0.000192226	0.0014749	Up
CD1E	11.4467	2.55963	0.692026	3.69875	0.000216663	0.00161714	Up
CXCR6	50.3901	1.72773	0.468817	3.6853	0.00022843	0.00168519	Up
TNFRSF10C	221.492	1.16588	0.317453	3.6726	0.000240097	0.00174814	Up
NRP2	2689.71	1.21953	0.332109	3.67209	0.000240574	0.00174961	Up
LYZ	487.149	1.36388	0.372176	3.66461	0.000247712	0.00179121	Up
KCNH2	5266.91	1.69455	0.463671	3.65464	0.000257546	0.00185033	Up
TNF	9.71202	1.62691	0.445682	3.65038	0.000261854	0.00187227	Up
CD244	12.4676	1.38453	0.381857	3.62577	0.0002881	0.00202235	Up
PTAFR	210.876	1.21	0.334739	3.61477	0.000300619	0.00208673	Up
ACVR1C	23.349	1.29701	0.359549	3.60734	0.000309355	0.00213598	Up
COLEC12	273.574	1.52335	0.422782	3.60316	0.000314375	0.00216277	Up
CSF1R	1800.76	1.2628	0.350545	3.6024	0.000315292	0.00216593	Up
CTSS	2315.37	1.02336	0.284389	3.59845	0.000320123	0.00219277	Up
NRG4	141.004	1.15047	0.321054	3.58344	0.000339104	0.00229052	Up
LGR6	12.2632	1.31147	0.366056	3.5827	0.000340066	0.00229512	Up
GRAP2	27.6305	1.66037	0.463935	3.57888	0.000345072	0.00232421	Up
RBP5	1246.5	1.30626	0.37058	3.52491	0.000423628	0.00274793	Up
CD4	1020.04	1.22195	0.347334	3.51808	0.000434683	0.00280144	Up
GPR32	10.6908	3.35072	0.954619	3.51001	0.000448086	0.00286722	Up
TACR1	22.0527	1.60843	0.45884	3.50543	0.000455876	0.0029074	Up
CYBB	741.204	1.32196	0.378582	3.49187	0.000479653	0.00302849	Up
IL2RG	212.776	1.29488	0.372668	3.47462	0.000511571	0.00319177	Up
LTB	69.8509	1.48853	0.428805	3.47135	0.000517851	0.00322141	Up
ALB	123.854	1.63786	0.473539	3.45876	0.000542672	0.00334526	Up
SEMA6A	4529.46	1.32366	0.383294	3.45338	0.0005536	0.00339371	Up
MICB	341.221	1.15021	0.333218	3.45182	0.000556818	0.00340793	Up
CCR4	8.30167	1.46942	0.427962	3.43352	0.000595789	0.00359654	Up
HTR3A	1.63731	2.48543	0.729041	3.40918	0.000651574	0.00387532	Up
BMP2	254.989	1.28217	0.376868	3.40216	0.000668545	0.00396259	Up
NCR1	4.14493	1.96555	0.585636	3.35627	0.000790009	0.00454615	Up
FGF1	36.6591	1.18437	0.353484	3.35056	0.00080649	0.00462415	Up
CCK	17.5212	2.82708	0.847113	3.33732	0.000845918	0.00480807	Up
S100Z	3.52644	1.19026	0.357795	3.32666	0.000878942	0.00497045	Up
THRB	361.41	1.22042	0.367286	3.32281	0.000891152	0.00502316	Up
CSF3R	184.535	1.05379	0.317609	3.31789	0.000906987	0.00508358	Up
DEFB119	2.89883	3.32706	1.00391	3.31412	0.000919334	0.00514366	Up
CMA1	1.69281	2.01679	0.610796	3.3019	0.000960319	0.00533208	Up
IL1B	56.5933	1.3984	0.427766	3.26907	0.001079	0.00585564	Up
SEMA3E	4.58768	2.20667	0.679935	3.24541	0.0011728	0.00626959	Up
CD1B	2.44961	2.83366	0.873431	3.24429	0.00117745	0.00628734	Up
CCR3	0.766918	2.09795	0.651975	3.21783	0.00129163	0.00676002	Up
BMPR1B	329.491	1.6877	0.525441	3.21197	0.00131828	0.00687865	Up
AMHR2	4847.55	1.03951	0.324442	3.20398	0.0013554	0.00702786	Up
GPER1	873.49	1.32546	0.420315	3.1535	0.00161325	0.00810555	Up
DEFB1	1.48258	2.22004	0.706915	3.14046	0.00168683	0.0083864	Up
GNLY	86.5882	1.13293	0.361068	3.13772	0.00170267	0.00844744	Up
KIR2DL1	3.40134	1.79392	0.57654	3.11153	0.00186119	0.0091147	Up
DMBT1	5.7178	1.43472	0.463347	3.09644	0.00195862	0.00949137	Up
IL7	48.3576	1.00199	0.327246	3.06189	0.00219946	0.0104423	Up
CXCR3	28.275	1.36364	0.446849	3.05169	0.00227559	0.0107473	Up
CD14	4305.26	1.17699	0.389023	3.02549	0.00248227	0.0115113	Up
VIPR2	15.7156	1.43372	0.474048	3.02441	0.00249118	0.0115357	Up
SCTR	10.9679	1.26852	0.420294	3.01818	0.00254294	0.0117438	Up
IGHD	12.8179	1.88363	0.624085	3.01822	0.00254264	0.0117438	Up
CCL11	3.31864	2.56816	0.851305	3.01673	0.00255519	0.0117947	Up
HTN3	6.67852	2.32336	0.782021	2.97097	0.00296863	0.0132205	Up
KIR2DL3	9.09261	2.01834	0.68045	2.96618	0.00301523	0.0133923	Up
ACKR4	21.3174	1.08817	0.367619	2.96005	0.00307589	0.0136089	Up
SLURP1	9.53962	2.7635	0.933686	2.95978	0.00307863	0.0136176	Up
IL12B	1.45742	1.53138	0.52021	2.94377	0.00324244	0.0142261	Up
XCL1	13.2813	1.64323	0.558988	2.93965	0.00328582	0.0143607	Up
PDCD1	30.0557	1.38359	0.473121	2.9244	0.00345126	0.0149486	Up
CXCL3	5.35913	1.02888	0.352829	2.91609	0.00354447	0.0152687	Up
NR0B2	1672.9	1.66123	0.571792	2.9053	0.00366896	0.0156909	Up
CD3E	140.653	1.32485	0.456545	2.9019	0.00370905	0.0158045	Up
COLEC10	6.97427	1.73319	0.59727	2.90185	0.00370968	0.0158045	Up
FASLG	12.7362	1.64453	0.567269	2.89903	0.00374323	0.015901	Up
GUCA2A	3.59722	1.72205	0.600238	2.86895	0.00411838	0.0171301	Up
LCK	80.5213	1.02123	0.35653	2.86436	0.00417854	0.0173271	Up
CCL21	334.299	2.02869	0.71401	2.84126	0.0044935	0.0184038	Up
PCSK1	254.603	1.63961	0.578096	2.83623	0.00456491	0.018648	Up
TNFRSF18	18.1529	1.09081	0.384616	2.83609	0.00456695	0.0186523	Up
HSPA2	1637.34	1.02415	0.362489	2.82533	0.00472321	0.0191585	Up
CCL5	559.337	1.2011	0.431501	2.78355	0.00537678	0.0211638	Up
FPR1	124.432	1.20771	0.445205	2.7127	0.00667372	0.0251351	Up
FCGR2B	133.103	1.10609	0.410727	2.69302	0.00708085	0.026339	Up
CXCL5	4.08786	1.20133	0.446587	2.69002	0.00714471	0.0265297	Up
IL5RA	2.52973	1.20642	0.451321	2.67308	0.0075159	0.0276	Up
FLT3	11.13	1.06071	0.400736	2.6469	0.0081233	0.0293811	Up
C3	49605.1	1.28321	0.490829	2.61437	0.00893911	0.0317031	Up
ORM1	57.2339	1.81345	0.699796	2.5914	0.00955857	0.0333942	Up
NTF3	19.4085	1.32761	0.515008	2.57784	0.00994201	0.0344609	Up
WFDC2	10.9224	1.38605	0.538036	2.57613	0.0099913	0.0345434	Up
TRAV8-3	1.05203	1.81063	0.704578	2.5698	0.0101757	0.0350149	Up
KLRC3	1.0567	2.03056	0.806491	2.51778	0.0118099	0.0393461	Up
MC4R	1.35424	2.42729	0.968167	2.5071	0.0121726	0.0402718	Up
CCR9	0.683892	1.53303	0.620173	2.47193	0.0134385	0.0436152	Up
FGA	6.50531	2.7623	1.12212	2.46167	0.013829	0.0446156	Up
TRAC	178.123	1.07281	0.436706	2.45658	0.0140266	0.0450613	Up
TRAV12-2	1.2929	1.57597	0.648358	2.4307	0.0150696	0.0477251	Up
RNASE7	5.01768	1.20995	0.497834	2.43042	0.0150814	0.0477543	Up
IL1A	8.89929	1.21952	0.507576	2.40264	0.0162771	0.0505747	Up
FABP6	552.124	1.33688	0.560019	2.38721	0.0169769	0.0523323	Up
OPRK1	1.09162	1.66607	0.718157	2.31993	0.0203449	0.0603317	Up
SSTR5	418.334	1.40391	0.625028	2.24615	0.0246942	0.070316	Up
LCN10	14.6055	1.34186	0.597928	2.24419	0.0248201	0.070611	Up
CD3G	21.1634	1.06233	0.4769	2.22758	0.0259084	0.0731342	Up
TRBV27	0.798972	2.19816	1.00027	2.19757	0.0279796	0.0778823	Up
IGKC	2534.02	1.53042	0.713123	2.14607	0.031867	0.0861245	Up
KLRC4	0.695303	1.36627	0.638995	2.13815	0.0325043	0.0874234	Up
FCN2	539.901	1.13323	0.535091	2.11782	0.0341905	0.0908886	Up
CD1A	2.3103	1.257	0.63912	1.96677	0.0492098	0.120263	Up
SCT	74.9881	-5.93402	0.718588	-8.25788	1.48279e-16	8.03547e-14	Down
GDF10	98.5653	-4.16159	0.541846	-7.68039	1.58604e-14	4.42389e-12	Down
GREM2	386.031	-4.48352	0.618773	-7.24581	4.29857e-13	8.07238e-11	Down
THPO	41.7302	-3.73857	0.52221	-7.15912	8.11956e-13	1.39075e-10	Down
PDIA2	9.52784	-3.11181	0.458284	-6.79015	1.1202e-11	1.34474e-09	Down
CRLF1	226.344	-2.08912	0.338434	-6.17291	6.7045e-10	4.59077e-08	Down
TNFSF4	552.534	-2.4823	0.404807	-6.13206	8.67488e-10	5.6933e-08	Down
BMP7	238.749	-4.35645	0.716541	-6.07983	1.20309e-09	7.49105e-08	Down
CNTFR	36.8753	-2.92262	0.481255	-6.07292	1.25609e-09	7.73514e-08	Down
VAV2	4462.25	-1.36702	0.229489	-5.95681	2.57216e-09	1.41409e-07	Down
BMP6	330.995	-1.95195	0.341358	-5.71819	1.07664e-08	4.68362e-07	Down
ZC3HAV1L	91.6	-1.36037	0.239518	-5.67962	1.34992e-08	5.70245e-07	Down
IL11	7.54645	-2.43389	0.428772	-5.67643	1.37538e-08	5.75959e-07	Down
TGFB2	141.313	-1.88014	0.334778	-5.61609	1.95332e-08	7.63888e-07	Down
APOD	737.975	-2.27266	0.405886	-5.59924	2.1529e-08	8.2493e-07	Down
LEFTY1	11.1381	-2.13419	0.388525	-5.49305	3.95053e-08	1.38247e-06	Down
LTB4R	661.636	-1.35525	0.256385	-5.28599	1.25027e-07	3.64829e-06	Down
LTBP1	1517.3	-1.46199	0.278247	-5.25431	1.48583e-07	4.19372e-06	Down
ADCYAP1R1	144.474	-2.65068	0.511554	-5.18162	2.19965e-07	5.77849e-06	Down
TFR2	352.203	-1.89069	0.36853	-5.13034	2.89215e-07	7.24641e-06	Down
SEMA6B	5277.2	-1.62003	0.316224	-5.12304	3.00646e-07	7.50308e-06	Down
MC2R	3042.71	-2.7874	0.546658	-5.09898	3.41483e-07	8.35731e-06	Down
RXFP3	25.1593	-3.10391	0.61257	-5.06702	4.04086e-07	9.75101e-06	Down
BMP1	2734.89	-1.25487	0.249576	-5.028	4.95631e-07	1.17215e-05	Down
LTB4R2	102.635	-1.19073	0.237335	-5.01708	5.24614e-07	1.2224e-05	Down
PYY	4.46038	-2.51276	0.501649	-5.009	5.47145e-07	1.26271e-05	Down
SLIT2	1744.64	-2.17353	0.434758	-4.9994	5.75096e-07	1.32216e-05	Down
RORA	3984.66	-1.20683	0.241431	-4.99867	5.77276e-07	1.32557e-05	Down
VGF	4707.44	-3.05348	0.612542	-4.98493	6.19847e-07	1.4063e-05	Down
NR2E1	9.4351	-3.10216	0.627236	-4.94576	7.58489e-07	1.64886e-05	Down
OPRL1	192.27	-2.05626	0.417125	-4.92962	8.23915e-07	1.77179e-05	Down
CMTM3	1796.55	-1.17971	0.245666	-4.80209	1.57018e-06	2.99919e-05	Down
TNFAIP3	2438.45	-1.28347	0.267287	-4.80184	1.57211e-06	2.99919e-05	Down
ADM2	82.6985	-2.13036	0.448497	-4.75	2.03414e-06	3.69555e-05	Down
SLIT1	50.9085	-1.82071	0.386207	-4.71435	2.42489e-06	4.23898e-05	Down
NFATC4	4927.46	-1.76329	0.374228	-4.71182	2.45513e-06	4.27261e-05	Down
FGF9	694.747	-1.73395	0.368769	-4.70201	2.57618e-06	4.45825e-05	Down
RORB	624.163	-2.50312	0.534109	-4.68653	2.77872e-06	4.74384e-05	Down
PTN	2316.44	-2.78371	0.595906	-4.67139	2.99169e-06	5.03938e-05	Down
IL17D	115.236	-1.33089	0.285993	-4.65357	3.26234e-06	5.4469e-05	Down
TNFRSF19	414.737	-2.12094	0.45682	-4.64283	3.43677e-06	5.70299e-05	Down
GDF2	2.80196	-3.84932	0.832026	-4.62645	3.71987e-06	6.05839e-05	Down
NPPC	17.4317	-2.06441	0.452893	-4.55827	5.1576e-06	7.95966e-05	Down
VIM	49361.1	-1.03775	0.230574	-4.50071	6.77257e-06	9.8964e-05	Down
PLCG2	1153.22	-1.32753	0.29818	-4.45209	8.50378e-06	0.000119396	Down
PTX3	85.7488	-1.91694	0.439766	-4.35901	1.30655e-05	0.000169968	Down
TNFSF13B	1237.02	-1.71901	0.394564	-4.35673	1.32021e-05	0.000171071	Down
MAPT	528.465	-1.68488	0.38958	-4.32487	1.52621e-05	0.000191688	Down
FGF12	1901.38	-1.7817	0.412433	-4.31999	1.56035e-05	0.000194834	Down
OSGIN1	3122.24	-1.23059	0.288336	-4.2679	1.9732e-05	0.000235975	Down
NR4A2	456.69	-1.64423	0.386315	-4.25617	2.07954e-05	0.000246362	Down
DKK1	110.525	-2.05332	0.482665	-4.25414	2.09849e-05	0.000248298	Down
AGRP	3007.64	-1.95857	0.462185	-4.23763	2.25893e-05	0.000264476	Down
NR4A3	1165.23	-1.64378	0.38885	-4.22729	2.36525e-05	0.000274525	Down
CSF3	15.5617	-2.44394	0.586003	-4.17053	3.03892e-05	0.000337862	Down
PRTN3	24.3931	-2.32542	0.562198	-4.1363	3.5295e-05	0.000382318	Down
MMP12	8.6242	-2.91547	0.705012	-4.13535	3.54407e-05	0.000383241	Down
OBP2B	6.42807	-3.14793	0.775116	-4.06124	4.88132e-05	0.000497228	Down
PGF	760.852	-1.17386	0.289631	-4.05294	5.05779e-05	0.00051136	Down
SHC4	90.3649	-1.46939	0.363251	-4.0451	5.23012e-05	0.000525422	Down
CCL22	323.488	-2.41631	0.597924	-4.04117	5.31844e-05	0.000531408	Down
FGF8	2.33779	-2.18395	0.542737	-4.02395	5.72311e-05	0.000562728	Down
INHBE	24.5384	-1.61992	0.402747	-4.02217	5.76639e-05	0.000565979	Down
WNT5A	591.362	-1.48663	0.370901	-4.00815	6.11965e-05	0.000592503	Down
SERPIND1	11.6662	-1.91415	0.480993	-3.97958	6.90364e-05	0.000654053	Down
SEMA6D	239.868	-1.21715	0.311129	-3.91205	9.15144e-05	0.000823022	Down
ARTN	49.1105	-1.27302	0.329315	-3.86564	0.000110797	0.000951761	Down
ANGPTL4	1166.8	-1.54393	0.406825	-3.79507	0.000147604	0.00119455	Down
PRKCG	4.56403	-2.44312	0.650239	-3.75726	0.000171787	0.00134807	Down
SFTPD	24.1357	-1.62118	0.431933	-3.75331	0.000174516	0.00136291	Down
TSHR	33.0497	-1.99551	0.534049	-3.73656	0.000186555	0.00143588	Down
FGF17	19.5723	-1.54456	0.415479	-3.71754	0.000201173	0.00152798	Down
NOX4	78.3081	-1.24004	0.33744	-3.67485	0.00023799	0.0017368	Down
WFIKKN1	83.2442	-1.25151	0.340853	-3.67171	0.000240931	0.00175086	Down
SLC22A17	1611.51	-1.2378	0.340159	-3.63888	0.000273822	0.0019437	Down
HNF4G	6.13457	-2.51106	0.697945	-3.59779	0.000320927	0.0021959	Down
SLC11A1	262.104	-1.057	0.295024	-3.58275	0.000339993	0.00229512	Down
AREG	43.7062	-1.47038	0.416418	-3.53103	0.000413938	0.00269985	Down
AZU1	7.91278	-2.12462	0.607827	-3.49544	0.000473276	0.00299721	Down
UTS2	14.2685	-2.22566	0.639189	-3.48201	0.000497658	0.0031251	Down
IL18R1	102.778	-1.19683	0.346879	-3.45029	0.000559989	0.00342071	Down
GAL	7.1439	-2.69147	0.794342	-3.3883	0.000703271	0.00412587	Down
GIPR	45.2597	-1.18287	0.350636	-3.3735	0.000742189	0.00431019	Down
UCN2	1.72344	-1.9275	0.572801	-3.36504	0.000765324	0.00442558	Down
FGF21	1.88791	-2.85031	0.858332	-3.32075	0.000897746	0.0050467	Down
RAC3	277.699	-1.34675	0.408345	-3.29806	0.000973536	0.00539283	Down
IL4	4.66291	-1.25387	0.382173	-3.28089	0.00103481	0.00566772	Down
TUBB3	164.631	-1.04193	0.320488	-3.25108	0.00114968	0.0061686	Down
PGR	628.835	-1.11646	0.344718	-3.23877	0.00120048	0.00638157	Down
EPO	22.8574	-1.56148	0.485211	-3.21816	0.00129018	0.00675616	Down
FABP4	866.783	-1.71689	0.540317	-3.17757	0.00148514	0.00759469	Down
TRH	2.08664	-2.40272	0.759362	-3.16413	0.00155545	0.00787778	Down
LGR5	794.984	-2.08988	0.662712	-3.15352	0.00161312	0.00810555	Down
TMPRSS6	33.4016	-1.01807	0.326033	-3.12259	0.00179267	0.00882014	Down
BIRC5	897.669	-1.09447	0.35915	-3.0474	0.00230829	0.0108855	Down
IL1R2	499.777	-1.14896	0.377758	-3.04153	0.00235378	0.0110423	Down
NODAL	3.04014	-1.40519	0.466654	-3.01121	0.00260211	0.0119647	Down
MPO	6.79808	-2.26167	0.754554	-2.99736	0.0027233	0.0123512	Down
BDNF	199.898	-1.23413	0.412468	-2.99207	0.00277092	0.0125313	Down
PRKCQ	93.5804	-1.42639	0.479591	-2.97419	0.00293767	0.0131042	Down
TPM2	7494.31	-1.15653	0.392114	-2.94947	0.0031832	0.014005	Down
AGTR1	1714.69	-1.12517	0.383149	-2.93664	0.00331786	0.0144434	Down
S100G	1.71344	-2.90099	0.99004	-2.93017	0.00338777	0.0147106	Down
SEMA3B	5198.96	-1.21576	0.419423	-2.89866	0.00374763	0.0159161	Down
IL13	5.52524	-1.24244	0.435405	-2.85352	0.00432377	0.0178358	Down
LECT2	9.37416	-1.58344	0.5598	-2.82857	0.00467559	0.019006	Down
ULBP3	34.0054	-1.20098	0.434084	-2.76669	0.0056628	0.0220637	Down
ANGPTL7	0.924042	-1.9256	0.696469	-2.7648	0.00569577	0.0221603	Down
ULBP1	49.7591	-1.18397	0.429971	-2.75361	0.00589419	0.022755	Down
RNASE2	100.279	-1.20753	0.444058	-2.71931	0.00654182	0.024712	Down
INHA	11644.9	-1.21528	0.447038	-2.71851	0.00655765	0.0247567	Down
RAET1E	275.247	-1.19505	0.44682	-2.67457	0.00748255	0.0274935	Down
NOX3	1.10248	-1.96895	0.747233	-2.63499	0.00841395	0.0302306	Down
IL6	27.3953	-1.1641	0.45258	-2.57214	0.0101072	0.0348552	Down
IL34	1529.7	-1.21826	0.483981	-2.51716	0.0118304	0.0394007	Down
PRL	7.76375	-1.34362	0.537765	-2.49853	0.0124709	0.041058	Down
IL31RA	2.91739	-1.24422	0.509823	-2.44049	0.0146675	0.0467876	Down
IL1RL2	79.2381	-1.07997	0.445033	-2.42673	0.0152357	0.0481103	Down
DEFA4	3.65012	-2.72107	1.12674	-2.41499	0.0157356	0.0492917	Down
ELN	543.356	-1.01427	0.42164	-2.40554	0.0161484	0.0502933	Down
PPY	1.75795	-1.84728	0.775658	-2.38157	0.0172391	0.0529856	Down
TNC	1458.33	-1.19847	0.504396	-2.37604	0.0174995	0.0536035	Down
PLTP	5787.99	-1.00038	0.423455	-2.36243	0.0181558	0.0551495	Down
GHRHR	1.33916	-1.523	0.656279	-2.32067	0.0203049	0.0602342	Down
LCN15	0.707934	-1.79236	0.778314	-2.30287	0.021286	0.0625745	Down
LEP	4.65289	-1.49692	0.654785	-2.28613	0.0222468	0.0648109	Down
CCL18	27.5708	-1.36342	0.610601	-2.23292	0.0255542	0.0723413	Down
MBL2	5.0088	-2.09462	0.955649	-2.19183	0.0283918	0.0787884	Down
ADIPOQ	1.06533	-2.2186	1.01239	-2.19145	0.0284193	0.0788399	Down
CXCL1	16.803	-1.28183	0.586656	-2.18497	0.028891	0.0798683	Down
LCN1	2.39616	-1.3789	0.640031	-2.15443	0.0312063	0.0847935	Down
UMODL1	2.9635	-1.38449	0.643029	-2.15307	0.031313	0.0849783	Down
GALR3	3.50525	-1.03342	0.488558	-2.11524	0.0344094	0.0913681	Down
GCGR	1.98895	-1.78628	0.854729	-2.08988	0.0366285	0.0961569	Down
MARCO	114.092	-1.28928	0.620009	-2.07946	0.0375749	0.0980982	Down
GLP2R	1.29986	-1.27726	0.614534	-2.07842	0.0376709	0.0982677	Down
MLN	1.08556	-1.16723	0.561625	-2.07831	0.037681	0.0982803	Down
CBLC	1.27199	-1.63293	0.819025	-1.99375	0.0461793	0.114644	Down

## Sheet: Table S3
1860 differential GO pathways between two immune-related subtypes
ONTOLOGY	ID	Description	GeneRatio	BgRatio	pvalue	p.adjust	qvalue	geneID	Count
BP	GO:0019221	cytokine-mediated signaling pathway	69/337	496/18903	1.20072e-41	4.99139e-38	2.68835e-38	CX3CR1/CD74/IL33/DUOX2/PTPRC/XCR1/IL2RB/CCL17/SYK/PRLR/CCL2/CCR5/EBI3/CCL7/ANGPT1/CSF2RA/CCL19/IL10RA/TNFSF18/CSF2RB/CTSG/CSF1/CXCR6/TNF/CSF1R/CD4/IL2RG/CCR4/CSF3R/IL1B/CCR3/IL7/CXCR3/CCL11/ACKR4/IL12B/XCL1/CXCL3/CCL21/TNFRSF18/CCL5/CXCL5/IL5RA/FLT3/CCR9/IL1A/GREM2/THPO/CRLF1/CNTFR/SLIT2/TNFAIP3/TNFRSF19/TNFSF13B/CSF3/MMP12/CCL22/WNT5A/IL18R1/EPO/IL1R2/IL6/IL34/IL31RA/IL1RL2/LEP/CCL18/ADIPOQ/CXCL1	69
BP	GO:0070663	regulation of leukocyte proliferation	48/337	269/18903	4.86849e-34	8.77174e-31	4.72443e-31	HLA-E/HLA-A/HLA-DPA1/HLA-DPB1/CD74/IL33/PTPRC/HLA-G/TNFSF8/CD40LG/INPP5D/BTK/KITLG/SYK/PRLR/VAV3/SDC4/EBI3/CSF2RA/CCL19/TNFSF18/CSF2RB/TLR4/IGF1/CSF1/CSF1R/TACR1/IL1B/IL7/IL12B/XCL1/CD3E/CCL5/FCGR2B/IL5RA/IL1A/TNFSF4/TNFAIP3/TNFSF13B/SFTPD/GAL/IL4/EPO/PRKCQ/IL13/IL6/IL34/LEP	48
BP	GO:0070661	leukocyte proliferation	53/337	348/18903	6.33034e-34	8.77174e-31	4.72443e-31	HLA-E/CD79A/HLA-A/HLA-DPA1/HLA-DPB1/CD74/IL33/PIK3CG/PTPRC/HLA-G/TNFSF8/CD40LG/INPP5D/BTK/KITLG/SYK/PRLR/VAV3/SDC4/EBI3/CSF2RA/CCL19/TNFSF18/CSF2RB/TLR4/IGF1/CSF1/CR2/CSF1R/TACR1/IL1B/IL7/IL12B/XCL1/CD3E/CCL5/FCGR2B/IL5RA/FLT3/IL1A/TNFSF4/TNFAIP3/TNFSF13B/SFTPD/SLC11A1/GAL/IL4/EPO/PRKCQ/IL13/IL6/IL34/LEP	53
BP	GO:0002443	leukocyte mediated immunity	59/337	463/18903	2.34564e-33	2.4377e-30	1.31294e-30	HLA-E/HLA-B/B2M/HLA-F/HLA-A/HLA-DPA1/CX3CR1/HLA-DPB1/CD74/HLA-DOA/SH2D1B/HLA-DQA1/HLA-DRA/PIK3CG/PTPRC/NCR3/HLA-DMA/HLA-G/CD40LG/INPP5D/BTK/HLA-DQB1/AZGP1/SYK/CD1C/PTGDR/CSF2RB/CTSG/TLR4/SH2D1A/CR2/CD1E/TNF/PTAFR/NCR1/IL1B/CD1B/IGHD/IL12B/XCL1/FCGR2B/C3/KLRC3/IGKC/KLRC4/CD1A/TNFSF4/PLCG2/NR4A3/AZU1/IL18R1/IL4/IL13/ULBP3/ULBP1/RAET1E/IL6/LEP/MBL2	59
BP	GO:0002697	regulation of immune effector process	54/337	379/18903	4.89752e-33	4.0718e-30	2.19306e-30	HLA-E/HLA-B/B2M/HLA-F/HLA-A/CX3CR1/CD74/IL33/SH2D1B/HLA-DRA/PTPRC/NCR3/HLA-G/A2M/CD40LG/BTK/AZGP1/SYK/CD1C/ANGPT1/CCL19/TNFSF18/TLR4/TLR7/SH2D1A/CR2/CD1E/TNF/CD244/PTAFR/NCR1/IL1B/CD1B/IL12B/XCL1/COLEC10/FCGR2B/C3/KLRC3/KLRC4/FCN2/CD1A/TNFSF4/TGFB2/PLCG2/NR4A3/WNT5A/IL18R1/IL4/IL13/RAET1E/IL6/LEP/MBL2	54
BP	GO:0045785	positive regulation of cell adhesion	59/337	484/18903	2.79803e-32	1.93857e-29	1.04411e-29	HLA-E/B2M/HLA-A/HLA-DPA1/HLA-DPB1/CD74/HLA-DOA/HLA-DQA1/HLA-DRA/PTPRC/HLA-DMA/HLA-G/CD40LG/HLA-DQB1/KITLG/SYK/CCL2/VAV3/SDC4/TEK/EBI3/PRKCA/ANGPT1/CCL19/TNFSF18/NPY/CTSG/IGF1/CSF1/TNF/PTAFR/CD4/IL2RG/IL1B/IL7/IL12B/XCL1/CD3E/LCK/CCL21/TNFRSF18/CCL5/FGA/IL1A/TNFSF4/BMP7/TGFB2/TNFSF13B/NR4A3/WNT5A/AZU1/RAC3/IL4/EPO/NODAL/PRKCQ/IL6/IL1RL2/LEP	59
BP	GO:0001819	positive regulation of cytokine production	59/337	486/18903	3.51914e-32	2.08987e-29	1.12559e-29	HLA-E/B2M/HLA-F/HLA-A/HLA-DPA1/HGF/HLA-DPB1/CD74/IL33/PIK3CG/PTPRC/HLA-G/CD40LG/BTK/IL16/SYK/EBI3/ITK/CCL19/AGT/TLR4/TLR7/TNF/CD244/PTAFR/CSF1R/CD4/CYBB/LTB/IL1B/IL7/CD14/IGHD/IL12B/XCL1/CD3E/C3/ORM1/IL1A/TNFSF4/RORA/NFATC4/IL17D/GDF2/PLCG2/NR4A3/MMP12/WNT5A/SLC11A1/AZU1/IL18R1/IL4/NODAL/PRKCQ/IL13/IL6/IL1RL2/LEP/ADIPOQ	59
BP	GO:0070665	positive regulation of leukocyte proliferation	38/337	167/18903	3.19142e-31	1.65834e-28	8.93179e-29	HLA-E/HLA-A/HLA-DPA1/HLA-DPB1/CD74/PTPRC/CD40LG/BTK/KITLG/SYK/PRLR/VAV3/EBI3/CSF2RA/CCL19/CSF2RB/TLR4/IGF1/CSF1/CSF1R/TACR1/IL1B/IL7/IL12B/XCL1/CD3E/CCL5/IL5RA/IL1A/TNFSF4/TNFSF13B/IL4/EPO/PRKCQ/IL13/IL6/IL34/LEP	38
BP	GO:0060326	cell chemotaxis	48/337	319/18903	1.69747e-30	7.84041e-28	4.22282e-28	HGF/CX3CR1/CD74/PIK3CG/XCR1/MET/CCL17/IL16/SYK/CCL2/VAV3/CCR5/CCL7/CCL19/TNFSF18/CTSG/CSF1/CXCR6/CSF1R/CCR4/FGF1/CSF3R/IL1B/CCR3/CXCR3/CCL11/ACKR4/XCL1/CXCL3/CCL21/CCL5/CXCL5/CCR9/TGFB2/SLIT2/PTN/PGF/CCL22/WNT5A/SFTPD/AZU1/IL4/PRKCQ/AGTR1/IL6/IL34/CCL18/CXCL1	48
BP	GO:0002699	positive regulation of immune effector process	44/337	261/18903	3.83039e-30	1.59229e-27	8.57604e-28	HLA-E/HLA-B/B2M/HLA-F/HLA-A/CD74/IL33/SH2D1B/HLA-DRA/PTPRC/NCR3/HLA-G/BTK/AZGP1/SYK/CD1C/CCL19/TLR4/TLR7/SH2D1A/CD1E/TNF/CD244/PTAFR/IL1B/CD1B/IL12B/XCL1/COLEC10/C3/KLRC3/KLRC4/FCN2/CD1A/TNFSF4/PLCG2/NR4A3/WNT5A/IL18R1/IL4/IL13/RAET1E/IL6/MBL2	44
BP	GO:0032103	positive regulation of response to external stimulus	55/337	464/18903	1.86326e-29	7.04145e-27	3.7925e-27	HLA-E/HLA-F/CX3CR1/CD74/IL33/SH2D1B/PIK3CG/NCR3/HLA-G/MET/BTK/IL16/SYK/PRKCA/CCL7/CCL19/AGT/TNFSF18/NPY/TLR4/TLR7/SH2D1A/CSF1/TNF/CSF1R/CCR4/IL1B/CD14/IL12B/XCL1/COLEC10/CCL21/CCL5/C3/NTF3/KLRC3/KLRC4/FCN2/TNFSF4/BMP6/SLIT2/PTN/PLCG2/MMP12/PGF/WNT5A/ARTN/AZU1/IL4/FABP4/AGTR1/RAET1E/IL6/IL34/MBL2	55
BP	GO:0022409	positive regulation of cell-cell adhesion	47/337	322/18903	2.90954e-29	1.00791e-26	5.42858e-27	HLA-E/B2M/HLA-A/HLA-DPA1/HLA-DPB1/CD74/HLA-DOA/HLA-DQA1/HLA-DRA/PTPRC/HLA-DMA/HLA-G/CD40LG/HLA-DQB1/KITLG/SYK/CCL2/EBI3/CCL19/CTSG/IGF1/TNF/PTAFR/CD4/IL2RG/IL1B/IL7/IL12B/XCL1/CD3E/LCK/CCL21/CCL5/FGA/IL1A/TNFSF4/BMP7/TNFSF13B/NR4A3/WNT5A/IL4/EPO/NODAL/PRKCQ/IL6/IL1RL2/LEP	47
BP	GO:0002460	adaptive immune response based on somatic recombination of immune receptors built from immunoglobulin superfamily domains	50/337	375/18903	3.27655e-29	1.01719e-26	5.47854e-27	HLA-E/HLA-B/B2M/HLA-F/HLA-A/HLA-DPA1/HLA-DPB1/CD74/IL33/HLA-DOA/HLA-DQA1/HLA-DRA/PTPRC/HLA-DMA/HLA-G/CD40LG/INPP5D/BTK/HLA-DQB1/AZGP1/CD1C/EBI3/RORC/CCL19/TNFSF18/CSF2RB/TLR4/CR2/CD1E/TNF/CD4/IL1B/CD1B/IGHD/IL12B/XCL1/FCGR2B/C3/IGKC/CD1A/TNFSF4/RORA/TNFAIP3/TNFSF13B/SLC11A1/IL18R1/IL4/PRKCQ/IL6/MBL2	50
BP	GO:0002696	positive regulation of leukocyte activation	54/337	450/18903	3.4257e-29	1.01719e-26	5.47854e-27	HLA-E/B2M/HLA-F/HLA-A/HLA-DPA1/HLA-DPB1/CD74/IL33/HLA-DOA/HLA-DQA1/HLA-DRA/PTPRC/HLA-DMA/HLA-G/CD40LG/INPP5D/BTK/HLA-DQB1/KITLG/SYK/PRLR/CCL2/VAV3/EBI3/CCL19/TLR4/IGF1/TNF/PTAFR/CD4/TACR1/IL2RG/IL1B/IL7/IGHD/IL12B/XCL1/CD3E/LCK/CCL21/CCL5/IL1A/IGKC/TNFSF4/TNFSF13B/NR4A3/WNT5A/IL4/EPO/PRKCQ/IL13/IL6/IL1RL2/LEP	54
BP	GO:0001906	cell killing	38/337	189/18903	4.41882e-29	1.2246e-26	6.59567e-27	HLA-E/HLA-B/B2M/HLA-F/HLA-A/CX3CR1/HLA-DRA/SEMG1/PTPRC/NCR3/HLA-G/AZGP1/SYK/CD1C/CTSG/SH2D1A/LTF/CD1E/LYZ/NCR1/CD1B/GNLY/HTN3/IL12B/XCL1/FCGR2B/C3/KLRC3/KLRC4/CD1A/AZU1/IL4/IL13/ULBP3/ULBP1/RAET1E/DEFA4/LEP	38
BP	GO:0050900	leukocyte migration	51/337	398/18903	5.95999e-29	1.54848e-26	8.34006e-27	CX3CR1/CD74/IL33/PIK3CG/ITGAL/CCL17/IL16/KITLG/SYK/CCL2/VAV3/CCR5/CCL7/CCL19/TNFSF18/CTSG/CSF1/TNF/PTAFR/CSF1R/TACR1/CSF3R/IL1B/CXCR3/CCL11/XCL1/CXCL3/LCK/CCL21/TNFRSF18/CCL5/CXCL5/IL1A/TGFB2/APOD/SLIT2/PTN/PRTN3/PGF/CCL22/WNT5A/ARTN/SFTPD/AZU1/IL4/IL6/IL34/LEP/CCL18/CXCL1/UMODL1	51
BP	GO:0043410	positive regulation of MAPK cascade	56/337	496/18903	6.87484e-29	1.6811e-26	9.05436e-27	PROK1/HGF/CD74/PIK3CG/PTPRC/TGFA/CALCR/EGF/CCL17/KITLG/SYK/CCL2/TEK/PRKCA/CCL7/ANGPT1/NRG1/CCL19/NPY/TLR4/IGF1/TNF/CSF1R/CD4/BMP2/FGF1/IL1B/GPER1/CCL11/XCL1/CCL21/CCL5/FCGR2B/FLT3/NTF3/FGA/IL1A/OPRK1/THPO/IL11/TGFB2/TNFRSF19/PLCG2/DKK1/CCL22/FGF8/WNT5A/NOX4/FGF21/EPO/NODAL/IL6/IL34/LEP/CCL18/MARCO	56
BP	GO:0032943	mononuclear cell proliferation	46/337	312/18903	7.61528e-29	1.75871e-26	9.47234e-27	HLA-E/CD79A/HLA-A/HLA-DPA1/HLA-DPB1/CD74/PIK3CG/PTPRC/HLA-G/TNFSF8/CD40LG/INPP5D/BTK/KITLG/SYK/PRLR/VAV3/SDC4/EBI3/CCL19/TNFSF18/TLR4/IGF1/CSF1/CR2/TACR1/IL1B/IL7/IL12B/XCL1/CD3E/CCL5/FCGR2B/FLT3/IL1A/TNFSF4/TNFSF13B/SFTPD/SLC11A1/GAL/IL4/EPO/PRKCQ/IL13/IL6/LEP	46
BP	GO:0050731	positive regulation of peptidyl-tyrosine phosphorylation	38/337	193/18903	1.00544e-28	2.1998e-26	1.18481e-26	HGF/CD74/SH2D1B/PTPRC/TGFA/EGF/KITLG/SYK/ANGPT1/NRG1/AGT/TNFSF18/IGF1/TNF/CSF1R/CD4/IL12B/CD3E/TNFRSF18/CCL5/FLT3/NTF3/CRLF1/BMP6/IL11/PLCG2/CSF3/FGF8/NOX4/AREG/IL4/EPO/IL13/IL6/IL34/IL31RA/LEP/ADIPOQ	38
BP	GO:0050867	positive regulation of cell activation	54/337	467/18903	2.2243e-28	4.62321e-26	2.49004e-26	HLA-E/B2M/HLA-F/HLA-A/HLA-DPA1/HLA-DPB1/CD74/IL33/HLA-DOA/HLA-DQA1/HLA-DRA/PTPRC/HLA-DMA/HLA-G/CD40LG/INPP5D/BTK/HLA-DQB1/KITLG/SYK/PRLR/CCL2/VAV3/EBI3/CCL19/TLR4/IGF1/TNF/PTAFR/CD4/TACR1/IL2RG/IL1B/IL7/IGHD/IL12B/XCL1/CD3E/LCK/CCL21/CCL5/IL1A/IGKC/TNFSF4/TNFSF13B/NR4A3/WNT5A/IL4/EPO/PRKCQ/IL13/IL6/IL1RL2/LEP	54
BP	GO:0022407	regulation of cell-cell adhesion	55/337	490/18903	3.03346e-28	5.76826e-26	3.10676e-26	HLA-E/B2M/HLA-A/HLA-DPA1/HLA-DPB1/CD74/HLA-DOA/HLA-DQA1/HLA-DRA/PTPRC/HLA-DMA/HLA-G/CD40LG/HLA-DQB1/KITLG/SYK/CCL2/SDC4/EBI3/PRKCA/CCL19/TNFSF18/CTSG/IGF1/TNF/PTAFR/CD4/IL2RG/BMP2/IL1B/IL7/IL12B/XCL1/CD3E/LCK/CCL21/CCL5/FCGR2B/FGA/IL1A/TNFSF4/BMP7/BMP6/TNFSF13B/NR4A3/WNT5A/SFTPD/IL4/EPO/NODAL/PRKCQ/IL6/IL1RL2/LEP/ADIPOQ	55
BP	GO:0046651	lymphocyte proliferation	45/337	305/18903	3.05272e-28	5.76826e-26	3.10676e-26	HLA-E/CD79A/HLA-A/HLA-DPA1/HLA-DPB1/CD74/PIK3CG/PTPRC/HLA-G/TNFSF8/CD40LG/INPP5D/BTK/KITLG/SYK/PRLR/VAV3/SDC4/EBI3/CCL19/TNFSF18/TLR4/IGF1/CR2/TACR1/IL1B/IL7/IL12B/XCL1/CD3E/CCL5/FCGR2B/FLT3/IL1A/TNFSF4/TNFSF13B/SFTPD/SLC11A1/GAL/IL4/EPO/PRKCQ/IL13/IL6/LEP	45
BP	GO:0032944	regulation of mononuclear cell proliferation	41/337	243/18903	3.82709e-28	6.9118e-26	3.72267e-26	HLA-E/HLA-A/HLA-DPA1/HLA-DPB1/CD74/PTPRC/HLA-G/TNFSF8/CD40LG/INPP5D/BTK/KITLG/SYK/PRLR/VAV3/SDC4/EBI3/CCL19/TNFSF18/TLR4/IGF1/CSF1/TACR1/IL1B/IL7/IL12B/XCL1/CD3E/CCL5/FCGR2B/IL1A/TNFSF4/TNFSF13B/SFTPD/GAL/IL4/EPO/PRKCQ/IL13/IL6/LEP	41
BP	GO:0007159	leukocyte cell-cell adhesion	51/337	414/18903	3.99045e-28	6.9118e-26	3.72267e-26	HLA-E/B2M/HLA-A/HLA-DPA1/CX3CR1/HLA-DPB1/CD74/HLA-DOA/HLA-DQA1/HLA-DRA/PTPRC/HLA-DMA/HLA-G/CD40LG/ITGAL/HLA-DQB1/KITLG/SYK/CCL2/SDC4/EBI3/OLR1/CCL19/TNFSF18/CTSG/IGF1/TNF/PTAFR/CD4/IL2RG/IL1B/IL7/IL12B/XCL1/CD3E/LCK/CCL21/CCL5/FCGR2B/IL1A/TNFSF4/BMP7/TNFSF13B/NR4A3/SFTPD/IL4/EPO/PRKCQ/IL6/IL1RL2/LEP	51
BP	GO:0002449	lymphocyte mediated immunity	48/337	367/18903	1.13207e-27	1.8824e-25	1.01386e-25	HLA-E/HLA-B/B2M/HLA-F/HLA-A/HLA-DPA1/HLA-DPB1/CD74/HLA-DOA/SH2D1B/HLA-DQA1/HLA-DRA/PTPRC/NCR3/HLA-DMA/HLA-G/CD40LG/INPP5D/BTK/HLA-DQB1/AZGP1/CD1C/CSF2RB/SH2D1A/CR2/CD1E/TNF/NCR1/IL1B/CD1B/IGHD/IL12B/XCL1/FCGR2B/C3/KLRC3/IGKC/KLRC4/CD1A/TNFSF4/IL18R1/IL4/ULBP3/ULBP1/RAET1E/IL6/LEP/MBL2	48
BP	GO:0050670	regulation of lymphocyte proliferation	40/337	239/18903	2.47234e-27	3.95289e-25	2.12901e-25	HLA-E/HLA-A/HLA-DPA1/HLA-DPB1/CD74/PTPRC/HLA-G/TNFSF8/CD40LG/INPP5D/BTK/KITLG/SYK/PRLR/VAV3/SDC4/EBI3/CCL19/TNFSF18/TLR4/IGF1/TACR1/IL1B/IL7/IL12B/XCL1/CD3E/CCL5/FCGR2B/IL1A/TNFSF4/TNFSF13B/SFTPD/GAL/IL4/EPO/PRKCQ/IL13/IL6/LEP	40
BP	GO:1903039	positive regulation of leukocyte cell-cell adhesion	42/337	275/18903	5.15954e-27	7.94378e-25	4.2785e-25	HLA-E/B2M/HLA-A/HLA-DPA1/HLA-DPB1/CD74/HLA-DOA/HLA-DQA1/HLA-DRA/PTPRC/HLA-DMA/HLA-G/CD40LG/HLA-DQB1/KITLG/SYK/CCL2/EBI3/CCL19/IGF1/TNF/PTAFR/CD4/IL2RG/IL1B/IL7/IL12B/XCL1/CD3E/LCK/CCL21/CCL5/IL1A/TNFSF4/TNFSF13B/NR4A3/IL4/EPO/PRKCQ/IL6/IL1RL2/LEP	42
BP	GO:0051251	positive regulation of lymphocyte activation	49/337	400/18903	6.37056e-27	9.45801e-25	5.09406e-25	HLA-E/B2M/HLA-F/HLA-A/HLA-DPA1/HLA-DPB1/CD74/HLA-DOA/HLA-DQA1/HLA-DRA/PTPRC/HLA-DMA/HLA-G/CD40LG/INPP5D/BTK/HLA-DQB1/KITLG/SYK/PRLR/CCL2/VAV3/EBI3/CCL19/TLR4/IGF1/CD4/TACR1/IL2RG/IL1B/IL7/IGHD/IL12B/XCL1/CD3E/LCK/CCL21/CCL5/IL1A/IGKC/TNFSF4/TNFSF13B/IL4/EPO/PRKCQ/IL13/IL6/IL1RL2/LEP	49
BP	GO:0032946	positive regulation of mononuclear cell proliferation	33/337	149/18903	8.14378e-27	1.16737e-24	6.28741e-25	HLA-E/HLA-A/HLA-DPA1/HLA-DPB1/CD74/PTPRC/CD40LG/BTK/KITLG/SYK/PRLR/VAV3/EBI3/CCL19/TLR4/IGF1/CSF1/TACR1/IL1B/IL7/IL12B/XCL1/CD3E/CCL5/IL1A/TNFSF4/TNFSF13B/IL4/EPO/PRKCQ/IL13/IL6/LEP	33
BP	GO:1903037	regulation of leukocyte cell-cell adhesion	47/337	377/18903	3.54037e-26	4.90578e-24	2.64224e-24	HLA-E/B2M/HLA-A/HLA-DPA1/HLA-DPB1/CD74/HLA-DOA/HLA-DQA1/HLA-DRA/PTPRC/HLA-DMA/HLA-G/CD40LG/HLA-DQB1/KITLG/SYK/CCL2/SDC4/EBI3/CCL19/TNFSF18/CTSG/IGF1/TNF/PTAFR/CD4/IL2RG/IL1B/IL7/IL12B/XCL1/CD3E/LCK/CCL21/CCL5/FCGR2B/IL1A/TNFSF4/TNFSF13B/NR4A3/SFTPD/IL4/EPO/PRKCQ/IL6/IL1RL2/LEP	47
BP	GO:0002703	regulation of leukocyte mediated immunity	39/337	241/18903	4.21972e-26	5.65851e-24	3.04766e-24	HLA-E/HLA-B/B2M/HLA-F/HLA-A/CX3CR1/SH2D1B/HLA-DRA/PTPRC/NCR3/HLA-G/BTK/AZGP1/SYK/CD1C/TLR4/SH2D1A/CR2/CD1E/TNF/PTAFR/NCR1/IL1B/CD1B/IL12B/XCL1/FCGR2B/C3/KLRC3/KLRC4/CD1A/TNFSF4/PLCG2/IL18R1/IL4/IL13/RAET1E/IL6/LEP	39
BP	GO:0050671	positive regulation of lymphocyte proliferation	32/337	146/18903	7.03384e-26	9.13739e-24	4.92137e-24	HLA-E/HLA-A/HLA-DPA1/HLA-DPB1/CD74/PTPRC/CD40LG/BTK/KITLG/SYK/PRLR/VAV3/EBI3/CCL19/TLR4/IGF1/TACR1/IL1B/IL7/IL12B/XCL1/CD3E/CCL5/IL1A/TNFSF4/TNFSF13B/IL4/EPO/PRKCQ/IL13/IL6/LEP	32
BP	GO:0050730	regulation of peptidyl-tyrosine phosphorylation	40/337	266/18903	1.69923e-25	2.14052e-23	1.15288e-23	HGF/CD74/SH2D1B/PTPRC/TGFA/EGF/KITLG/SYK/ANGPT1/NRG1/AGT/TNFSF18/IGF1/TNF/CSF1R/CD4/IL7/IL12B/CD3E/TNFRSF18/CCL5/FLT3/NTF3/CRLF1/BMP6/IL11/PLCG2/CSF3/FGF8/NOX4/AREG/IL4/EPO/IL13/IL6/IL34/IL31RA/LEP/ADIPOQ/CBLC	40
BP	GO:0050870	positive regulation of T cell activation	39/337	251/18903	2.02023e-25	2.47003e-23	1.33035e-23	HLA-E/B2M/HLA-A/HLA-DPA1/HLA-DPB1/CD74/HLA-DOA/HLA-DQA1/HLA-DRA/PTPRC/HLA-DMA/HLA-G/CD40LG/HLA-DQB1/KITLG/SYK/CCL2/EBI3/CCL19/IGF1/CD4/IL2RG/IL1B/IL7/IL12B/XCL1/CD3E/LCK/CCL21/CCL5/IL1A/TNFSF4/TNFSF13B/IL4/EPO/PRKCQ/IL6/IL1RL2/LEP	39
BP	GO:0002705	positive regulation of leukocyte mediated immunity	31/337	140/18903	3.02146e-25	3.58863e-23	1.93283e-23	HLA-E/HLA-B/B2M/HLA-F/HLA-A/SH2D1B/HLA-DRA/PTPRC/NCR3/HLA-G/BTK/AZGP1/CD1C/SH2D1A/CD1E/TNF/PTAFR/IL1B/CD1B/IL12B/XCL1/C3/KLRC3/KLRC4/CD1A/TNFSF4/PLCG2/IL18R1/IL4/RAET1E/IL6	31
BP	GO:0018108	peptidyl-tyrosine phosphorylation	46/337	380/18903	4.44934e-25	5.13776e-23	2.76718e-23	HGF/CD74/SH2D1B/PTPRC/TGFA/MET/EGF/BTK/KITLG/SYK/PRLR/TEK/ITK/ANGPT1/NRG1/AGT/TNFSF18/IGF1/TNF/CSF1R/CD4/IL7/IL12B/CD3E/LCK/TNFRSF18/CCL5/FLT3/NTF3/CRLF1/BMP6/IL11/PLCG2/CSF3/FGF8/NOX4/AREG/IL4/EPO/IL13/IL6/IL34/IL31RA/LEP/ADIPOQ/CBLC	46
BP	GO:0018212	peptidyl-tyrosine modification	46/337	382/18903	5.57805e-25	6.26481e-23	3.37421e-23	HGF/CD74/SH2D1B/PTPRC/TGFA/MET/EGF/BTK/KITLG/SYK/PRLR/TEK/ITK/ANGPT1/NRG1/AGT/TNFSF18/IGF1/TNF/CSF1R/CD4/IL7/IL12B/CD3E/LCK/TNFRSF18/CCL5/FLT3/NTF3/CRLF1/BMP6/IL11/PLCG2/CSF3/FGF8/NOX4/AREG/IL4/EPO/IL13/IL6/IL34/IL31RA/LEP/ADIPOQ/CBLC	46
BP	GO:0002708	positive regulation of lymphocyte mediated immunity	29/337	119/18903	5.72679e-25	6.26481e-23	3.37421e-23	HLA-E/HLA-B/B2M/HLA-F/HLA-A/SH2D1B/HLA-DRA/PTPRC/NCR3/HLA-G/BTK/AZGP1/CD1C/SH2D1A/CD1E/TNF/IL1B/CD1B/IL12B/XCL1/C3/KLRC3/KLRC4/CD1A/TNFSF4/IL18R1/IL4/RAET1E/IL6	29
BP	GO:0031341	regulation of cell killing	27/337	102/18903	2.2587e-24	2.40754e-22	1.29669e-22	HLA-E/HLA-B/B2M/HLA-F/HLA-A/CX3CR1/HLA-DRA/PTPRC/NCR3/HLA-G/AZGP1/SYK/CD1C/SH2D1A/CD1E/NCR1/CD1B/IL12B/XCL1/FCGR2B/KLRC3/KLRC4/CD1A/IL4/IL13/RAET1E/LEP	27
BP	GO:0050863	regulation of T cell activation	45/337	376/18903	2.45499e-24	2.55135e-22	1.37415e-22	HLA-E/B2M/HLA-A/HLA-DPA1/HLA-DPB1/CD74/HLA-DOA/HLA-DQA1/HLA-DRA/PTPRC/HLA-DMA/HLA-G/TNFSF8/CD40LG/HLA-DQB1/KITLG/SYK/CCL2/SDC4/EBI3/CCL19/TNFSF18/CTSG/IGF1/CD4/IL2RG/IL1B/IL7/IL12B/XCL1/CD3E/LCK/CCL21/CCL5/FCGR2B/IL1A/TNFSF4/TNFSF13B/SFTPD/IL4/EPO/PRKCQ/IL6/IL1RL2/LEP	45
BP	GO:0002706	regulation of lymphocyte mediated immunity	33/337	179/18903	4.28501e-24	4.34459e-22	2.33998e-22	HLA-E/HLA-B/B2M/HLA-F/HLA-A/SH2D1B/HLA-DRA/PTPRC/NCR3/HLA-G/BTK/AZGP1/CD1C/SH2D1A/CR2/CD1E/TNF/NCR1/IL1B/CD1B/IL12B/XCL1/FCGR2B/C3/KLRC3/KLRC4/CD1A/TNFSF4/IL18R1/IL4/RAET1E/IL6/LEP	33
BP	GO:0002822	regulation of adaptive immune response based on somatic recombination of immune receptors built from immunoglobulin superfamily domains	33/337	182/18903	7.47419e-24	7.39767e-22	3.98436e-22	HLA-E/HLA-B/B2M/HLA-F/HLA-A/IL33/HLA-DRA/PTPRC/HLA-G/BTK/AZGP1/CD1C/CCL19/TNFSF18/CR2/CD1E/TNF/CD4/IL1B/CD1B/IL12B/XCL1/FCGR2B/C3/CD1A/TNFSF4/TNFAIP3/TNFSF13B/SLC11A1/IL18R1/IL4/PRKCQ/IL6	33
BP	GO:0002819	regulation of adaptive immune response	34/337	198/18903	9.74524e-24	9.42115e-22	5.0742e-22	HLA-E/HLA-B/B2M/HLA-F/HLA-A/IL33/HLA-DRA/PTPRC/HLA-G/BTK/AZGP1/CD1C/CCL19/TNFSF18/CD48/CR2/CD1E/TNF/CD4/IL1B/CD1B/IL12B/XCL1/FCGR2B/C3/CD1A/TNFSF4/TNFAIP3/TNFSF13B/SLC11A1/IL18R1/IL4/PRKCQ/IL6	34
BP	GO:0006959	humoral immune response	41/337	320/18903	2.2597e-23	2.1349e-21	1.14985e-21	HLA-E/SLPI/HLA-A/SEMG1/PTPRC/A2M/REG3G/HLA-DQB1/CCL2/EBI3/CTSG/SH2D1A/LTF/CR2/LYZ/TNF/IL1B/DEFB1/GNLY/DMBT1/IL7/IGHD/PDCD1/CXCL3/COLEC10/FCGR2B/CXCL5/C3/WFDC2/FGA/RNASE7/IGKC/FCN2/PRTN3/SFTPD/SLC11A1/AZU1/IL6/DEFA4/MBL2/CXCL1	41
BP	GO:0002237	response to molecule of bacterial origin	43/337	360/18903	3.01212e-23	2.78253e-21	1.49866e-21	SLPI/B2M/PPARD/CX3CR1/BTK/CCL2/CCR5/PRKCA/IL10RA/CSF2RB/CTSG/TLR4/CSF1/LTF/TNF/PTAFR/IL1B/DMBT1/CD14/IL12B/CXCL3/FASLG/PCSK1/CCL5/FCGR2B/CXCL5/IL1A/OPRK1/THPO/TNFSF4/BMP6/TNFAIP3/VIM/PLCG2/CSF3/WNT5A/SLC11A1/EPO/MPO/IL13/IL6/DEFA4/CXCL1	43
BP	GO:0070374	positive regulation of ERK1 and ERK2 cascade	35/337	223/18903	4.73562e-23	4.27956e-21	2.30496e-21	CD74/PTPRC/CALCR/CCL17/CCL2/TEK/PRKCA/CCL7/ANGPT1/NRG1/CCL19/NPY/TLR4/IGF1/TNF/CSF1R/CD4/BMP2/FGF1/GPER1/CCL11/XCL1/CCL21/CCL5/FGA/IL1A/THPO/CCL22/FGF8/NOX4/FGF21/EPO/NODAL/CCL18/MARCO	35
BP	GO:0030595	leukocyte chemotaxis	36/337	240/18903	5.45377e-23	4.82369e-21	2.59802e-21	CX3CR1/CD74/PIK3CG/CCL17/IL16/SYK/CCL2/VAV3/CCR5/CCL7/CCL19/TNFSF18/CTSG/CSF1/CSF1R/CSF3R/IL1B/CCL11/XCL1/CXCL3/CCL21/CCL5/CXCL5/TGFB2/SLIT2/PTN/PGF/CCL22/WNT5A/SFTPD/AZU1/IL4/IL6/IL34/CCL18/CXCL1	36
BP	GO:0002824	positive regulation of adaptive immune response based on somatic recombination of immune receptors built from immunoglobulin superfamily domains	27/337	114/18903	5.80461e-23	5.02704e-21	2.70755e-21	HLA-E/HLA-B/B2M/HLA-F/HLA-A/HLA-DRA/PTPRC/HLA-G/BTK/AZGP1/CD1C/CD1E/TNF/CD4/IL1B/CD1B/IL12B/XCL1/C3/CD1A/TNFSF4/TNFSF13B/SLC11A1/IL18R1/IL4/PRKCQ/IL6	27
BP	GO:0097529	myeloid leukocyte migration	36/337	242/18903	7.2981e-23	6.19147e-21	3.33471e-21	CX3CR1/CD74/PIK3CG/CCL17/KITLG/SYK/CCL2/VAV3/CCL7/CCL19/TNFSF18/CTSG/CSF1/CSF1R/CSF3R/IL1B/CCL11/XCL1/CXCL3/CCL21/CCL5/CXCL5/IL1A/TGFB2/SLIT2/PRTN3/PGF/CCL22/SFTPD/AZU1/IL4/IL6/IL34/CCL18/CXCL1/UMODL1	36
BP	GO:0070371	ERK1 and ERK2 cascade	41/337	340/18903	2.33975e-22	1.93522e-20	1.0423e-20	CD74/PTPRC/CALCR/EGF/CCL17/SYK/CCL2/TEK/PRKCA/CCL7/ANGPT1/NRG1/CCL19/AGT/NPY/TLR4/IGF1/TNF/CSF1R/CD4/SEMA6A/BMP2/FGF1/IL1B/GPER1/CCL11/XCL1/CCL21/CCL5/FGA/IL1A/THPO/CCL22/FGF8/NOX4/FGF21/EPO/NODAL/CCL18/ADIPOQ/MARCO	41
BP	GO:0019882	antigen processing and presentation	26/337	108/18903	2.37422e-22	1.93522e-20	1.0423e-20	HLA-E/HLA-B/B2M/HLA-F/HLA-C/HLA-A/HLA-DPA1/HLA-DPB1/CD74/HLA-DOA/HLA-DQA1/PSMB8/HLA-DRA/HLA-DMA/HLA-G/HLA-DQB1/AZGP1/CD1C/CCL19/CD1E/CTSS/CD1B/CCL21/FCGR2B/CD1A/SLC11A1	26
BP	GO:0002821	positive regulation of adaptive immune response	27/337	120/18903	2.52692e-22	2.02007e-20	1.08801e-20	HLA-E/HLA-B/B2M/HLA-F/HLA-A/HLA-DRA/PTPRC/HLA-G/BTK/AZGP1/CD1C/CD1E/TNF/CD4/IL1B/CD1B/IL12B/XCL1/C3/CD1A/TNFSF4/TNFSF13B/SLC11A1/IL18R1/IL4/PRKCQ/IL6	27
BP	GO:0001910	regulation of leukocyte mediated cytotoxicity	24/337	87/18903	2.90429e-22	2.27795e-20	1.2269e-20	HLA-E/HLA-B/B2M/HLA-F/HLA-A/CX3CR1/HLA-DRA/PTPRC/NCR3/HLA-G/AZGP1/CD1C/SH2D1A/CD1E/NCR1/CD1B/IL12B/XCL1/FCGR2B/KLRC3/KLRC4/CD1A/RAET1E/LEP	24
BP	GO:0001909	leukocyte mediated cytotoxicity	28/337	134/18903	3.62995e-22	2.79439e-20	1.50505e-20	HLA-E/HLA-B/B2M/HLA-F/HLA-A/CX3CR1/HLA-DRA/PTPRC/NCR3/HLA-G/AZGP1/CD1C/CTSG/SH2D1A/CD1E/NCR1/CD1B/IL12B/XCL1/FCGR2B/KLRC3/KLRC4/CD1A/AZU1/ULBP3/ULBP1/RAET1E/LEP	28
BP	GO:0033674	positive regulation of kinase activity	48/337	496/18903	7.01893e-22	5.27442e-20	2.84079e-20	CD74/PIK3CG/PTPRC/TGFA/CD40LG/MET/EGF/KITLG/SYK/PRLR/VAV3/SDC4/TEK/ANGPT1/NRG1/CCL19/AGT/TLR4/IGF1/LCP2/CSF1/LTF/TNF/CSF1R/CD4/BMP2/FGF1/IL1B/BMPR1B/IL12B/CCL21/CCL5/FLT3/NTF3/VAV2/TGFB2/MAPT/DKK1/WNT5A/NOX4/SLC11A1/AREG/AZU1/IL4/EPO/IL34/LEP/ADIPOQ	48
BP	GO:0070098	chemokine-mediated signaling pathway	24/337	90/18903	7.1053e-22	5.27442e-20	2.84079e-20	CX3CR1/XCR1/CCL17/CCL2/CCR5/CCL7/CCL19/CXCR6/CCR4/CCR3/CXCR3/CCL11/ACKR4/XCL1/CXCL3/CCL21/CCL5/CXCL5/CCR9/THPO/SLIT2/CCL22/CCL18/CXCL1	24
BP	GO:0070372	regulation of ERK1 and ERK2 cascade	39/337	315/18903	1.00846e-21	7.35469e-20	3.96121e-20	CD74/PTPRC/CALCR/CCL17/SYK/CCL2/TEK/PRKCA/CCL7/ANGPT1/NRG1/CCL19/NPY/TLR4/IGF1/TNF/CSF1R/CD4/SEMA6A/BMP2/FGF1/IL1B/GPER1/CCL11/XCL1/CCL21/CCL5/FGA/IL1A/THPO/CCL22/FGF8/NOX4/FGF21/EPO/NODAL/CCL18/ADIPOQ/MARCO	39
BP	GO:0032496	response to lipopolysaccharide	40/337	339/18903	1.76991e-21	1.26854e-19	6.8323e-20	SLPI/PPARD/CX3CR1/BTK/CCL2/CCR5/PRKCA/IL10RA/CSF2RB/CTSG/TLR4/CSF1/LTF/TNF/PTAFR/IL1B/CD14/IL12B/CXCL3/FASLG/PCSK1/CCL5/CXCL5/IL1A/OPRK1/THPO/TNFSF4/BMP6/TNFAIP3/VIM/PLCG2/CSF3/WNT5A/SLC11A1/EPO/MPO/IL13/IL6/DEFA4/CXCL1	40
BP	GO:0097530	granulocyte migration	29/337	158/18903	3.05176e-21	2.1502e-19	1.15809e-19	CD74/PIK3CG/CCL17/SYK/CCL2/VAV3/CCL7/CCL19/TNFSF18/CSF1/CSF1R/CSF3R/IL1B/CCL11/XCL1/CXCL3/CCL21/CCL5/CXCL5/IL1A/TGFB2/SLIT2/PRTN3/CCL22/IL4/IL34/CCL18/CXCL1/UMODL1	29
BP	GO:0002683	negative regulation of immune system process	45/337	449/18903	3.68526e-21	2.55327e-19	1.37518e-19	HLA-E/HLA-B/HLA-F/HLA-A/CX3CR1/CD74/IL33/HLA-DOA/PTPRC/HLA-G/A2M/INPP5D/BTK/KITLG/SYK/CCL2/SDC4/ANGPT1/TNFSF18/NPY/CTSG/TLR4/SH2D1A/LTF/CR2/TNF/GPER1/IL12B/XCL1/PDCD1/CCL21/FCGR2B/TNFSF4/TGFB2/APOD/SLIT2/TNFAIP3/IL17D/MMP12/SFTPD/GAL/IL4/INHA/IL31RA/ADIPOQ	45
BP	GO:0031343	positive regulation of cell killing	21/337	66/18903	4.33016e-21	2.9509e-19	1.58934e-19	HLA-E/HLA-B/B2M/HLA-F/HLA-A/HLA-DRA/PTPRC/NCR3/HLA-G/AZGP1/SYK/CD1C/SH2D1A/CD1E/CD1B/IL12B/XCL1/KLRC3/KLRC4/CD1A/RAET1E	21
BP	GO:1903131	mononuclear cell differentiation	46/337	473/18903	4.44111e-21	2.97769e-19	1.60377e-19	HLA-B/B2M/CD79A/CD74/HLA-DOA/HLA-DRA/PTPRC/HLA-G/TNFSF8/CD40LG/INPP5D/BTK/SYK/ITK/RORC/CCL19/TNFSF18/CSF1/CR2/CSF1R/CD4/IL2RG/IL1B/IL7/IL12B/CD3E/LCK/FCGR2B/FLT3/CCR9/IL1A/CD3G/TNFSF4/IL11/RORA/PLCG2/TNFSF13B/PRTN3/IL18R1/IL4/INHA/IL6/IL34/IL31RA/IL1RL2/LEP	46
BP	GO:1990868	response to chemokine	24/337	98/18903	6.52384e-21	4.23744e-19	2.28227e-19	CX3CR1/XCR1/CCL17/CCL2/CCR5/CCL7/CCL19/CXCR6/CCR4/CCR3/CXCR3/CCL11/ACKR4/XCL1/CXCL3/CCL21/CCL5/CXCL5/CCR9/THPO/SLIT2/CCL22/CCL18/CXCL1	24
BP	GO:1990869	cellular response to chemokine	24/337	98/18903	6.52384e-21	4.23744e-19	2.28227e-19	CX3CR1/XCR1/CCL17/CCL2/CCR5/CCL7/CCL19/CXCR6/CCR4/CCR3/CXCR3/CCL11/ACKR4/XCL1/CXCL3/CCL21/CCL5/CXCL5/CCR9/THPO/SLIT2/CCL22/CCL18/CXCL1	24
BP	GO:0001912	positive regulation of leukocyte mediated cytotoxicity	20/337	59/18903	8.91026e-21	5.69845e-19	3.06917e-19	HLA-E/HLA-B/B2M/HLA-F/HLA-A/HLA-DRA/PTPRC/NCR3/HLA-G/AZGP1/CD1C/SH2D1A/CD1E/CD1B/IL12B/XCL1/KLRC3/KLRC4/CD1A/RAET1E	20
BP	GO:0002711	positive regulation of T cell mediated immunity	20/337	60/18903	1.31516e-20	8.28351e-19	4.46147e-19	HLA-E/HLA-B/B2M/HLA-F/HLA-A/HLA-DRA/PTPRC/HLA-G/AZGP1/CD1C/CD1E/IL1B/CD1B/IL12B/XCL1/CD1A/TNFSF4/IL18R1/IL4/IL6	20
BP	GO:0071621	granulocyte chemotaxis	26/337	130/18903	3.75972e-20	2.33271e-18	1.25639e-18	CD74/PIK3CG/CCL17/SYK/CCL2/VAV3/CCL7/CCL19/TNFSF18/CSF1/CSF1R/CSF3R/IL1B/CCL11/XCL1/CXCL3/CCL21/CCL5/CXCL5/TGFB2/SLIT2/CCL22/IL4/IL34/CCL18/CXCL1	26
BP	GO:0042102	positive regulation of T cell proliferation	24/337	106/18903	4.85404e-20	2.96739e-18	1.59823e-18	HLA-E/HLA-A/HLA-DPA1/HLA-DPB1/PTPRC/CD40LG/KITLG/SYK/EBI3/CCL19/IGF1/IL1B/IL12B/XCL1/CD3E/CCL5/IL1A/TNFSF4/TNFSF13B/IL4/EPO/PRKCQ/IL6/LEP	24
BP	GO:0045860	positive regulation of protein kinase activity	42/337	420/18903	9.27991e-20	5.59081e-18	3.01119e-18	PIK3CG/PTPRC/TGFA/CD40LG/EGF/KITLG/SYK/PRLR/SDC4/ANGPT1/NRG1/CCL19/AGT/TLR4/IGF1/LCP2/CSF1/LTF/TNF/CSF1R/CD4/BMP2/FGF1/IL1B/BMPR1B/IL12B/CCL21/CCL5/FLT3/NTF3/TGFB2/DKK1/WNT5A/NOX4/SLC11A1/AREG/AZU1/IL4/EPO/IL34/LEP/ADIPOQ	42
BP	GO:0042098	T cell proliferation	31/337	212/18903	1.34158e-19	7.96704e-18	4.29102e-18	HLA-E/HLA-A/HLA-DPA1/HLA-DPB1/PIK3CG/PTPRC/HLA-G/TNFSF8/CD40LG/KITLG/SYK/SDC4/EBI3/CCL19/TNFSF18/IGF1/IL1B/IL12B/XCL1/CD3E/CCL5/IL1A/TNFSF4/TNFSF13B/SFTPD/SLC11A1/IL4/EPO/PRKCQ/IL6/LEP	31
BP	GO:0019884	antigen processing and presentation of exogenous antigen	18/337	49/18903	1.47287e-19	8.62354e-18	4.64461e-18	HLA-E/B2M/HLA-F/HLA-A/HLA-DPA1/HLA-DPB1/CD74/HLA-DOA/HLA-DQA1/HLA-DRA/HLA-DMA/HLA-DQB1/CD1C/CD1E/CTSS/CD1B/FCGR2B/CD1A	18
BP	GO:0042129	regulation of T cell proliferation	29/337	182/18903	1.84158e-19	1.06326e-17	5.72668e-18	HLA-E/HLA-A/HLA-DPA1/HLA-DPB1/PTPRC/HLA-G/TNFSF8/CD40LG/KITLG/SYK/SDC4/EBI3/CCL19/TNFSF18/IGF1/IL1B/IL12B/XCL1/CD3E/CCL5/IL1A/TNFSF4/TNFSF13B/SFTPD/IL4/EPO/PRKCQ/IL6/LEP	29
BP	GO:0001916	positive regulation of T cell mediated cytotoxicity	15/337	31/18903	9.94406e-19	5.66266e-17	3.04989e-17	HLA-E/HLA-B/B2M/HLA-F/HLA-A/HLA-DRA/PTPRC/HLA-G/AZGP1/CD1C/CD1E/CD1B/IL12B/XCL1/CD1A	15
BP	GO:0002768	immune response-regulating cell surface receptor signaling pathway	37/337	341/18903	1.0843e-18	6.09115e-17	3.28068e-17	CD79A/HLA-A/HLA-DPB1/PTPRC/NCR3/HLA-G/INPP5D/BTK/HLA-DQB1/SYK/VAV3/ITK/SH2D1A/LCP2/CD247/CR2/GPR32/MICB/KIR2DL1/IGHD/CD3E/COLEC10/LCK/FPR1/FCGR2B/KLRC3/TRAC/CD3G/IGKC/KLRC4/FCN2/VAV2/CMTM3/PLCG2/NR4A3/PRKCQ/MBL2	37
BP	GO:0048002	antigen processing and presentation of peptide antigen	19/337	64/18903	1.49821e-18	8.30409e-17	4.47256e-17	HLA-E/HLA-B/B2M/HLA-F/HLA-C/HLA-A/HLA-DPA1/HLA-DPB1/CD74/HLA-DOA/HLA-DQA1/HLA-DRA/HLA-DMA/HLA-G/HLA-DQB1/AZGP1/CTSS/FCGR2B/SLC11A1	19
BP	GO:0050920	regulation of chemotaxis	31/337	230/18903	1.52198e-18	8.32485e-17	4.48374e-17	CX3CR1/CD74/MET/IL16/CCL2/CCL7/CCL19/TNFSF18/CSF1/CSF1R/SEMA6A/CCR4/FGF1/SEMA3E/XCL1/CCL21/CCL5/NTF3/SEMA6B/SLIT2/SLIT1/PTN/PGF/WNT5A/SEMA6D/ARTN/AZU1/IL4/SEMA3B/IL6/IL34	31
BP	GO:0019883	antigen processing and presentation of endogenous antigen	14/337	26/18903	1.99364e-18	1.07631e-16	5.79696e-17	HLA-E/HLA-B/B2M/HLA-F/HLA-C/HLA-A/CD74/HLA-DRA/HLA-G/AZGP1/CD1C/CD1E/CD1B/CD1A	14
BP	GO:0030098	lymphocyte differentiation	40/337	419/18903	3.87635e-18	2.06589e-16	1.11268e-16	B2M/CD79A/CD74/HLA-DOA/HLA-DRA/PTPRC/HLA-G/TNFSF8/CD40LG/INPP5D/BTK/SYK/ITK/RORC/CCL19/TNFSF18/CR2/CD4/IL2RG/IL1B/IL7/IL12B/CD3E/LCK/FCGR2B/FLT3/CCR9/IL1A/CD3G/TNFSF4/IL11/RORA/PLCG2/TNFSF13B/IL18R1/IL4/INHA/IL6/IL1RL2/LEP	40
BP	GO:0002700	regulation of production of molecular mediator of immune response	28/337	187/18903	4.35162e-18	2.27179e-16	1.22358e-16	HLA-E/B2M/HLA-F/HLA-A/CD74/IL33/PTPRC/HLA-G/CD40LG/BTK/SYK/ANGPT1/TLR4/TLR7/TNF/CD244/IL1B/XCL1/FCGR2B/TNFSF4/TGFB2/PLCG2/NR4A3/WNT5A/IL18R1/IL4/IL13/IL6	28
BP	GO:0002709	regulation of T cell mediated immunity	21/337	89/18903	4.37198e-18	2.27179e-16	1.22358e-16	HLA-E/HLA-B/B2M/HLA-F/HLA-A/HLA-DRA/PTPRC/HLA-G/AZGP1/CD1C/CD1E/IL1B/CD1B/IL12B/XCL1/FCGR2B/CD1A/TNFSF4/IL18R1/IL4/IL6	21
BP	GO:0001914	regulation of T cell mediated cytotoxicity	16/337	41/18903	5.02774e-18	2.58028e-16	1.38973e-16	HLA-E/HLA-B/B2M/HLA-F/HLA-A/HLA-DRA/PTPRC/HLA-G/AZGP1/CD1C/CD1E/CD1B/IL12B/XCL1/FCGR2B/CD1A	16
BP	GO:0071216	cellular response to biotic stimulus	32/337	261/18903	7.25467e-18	3.67776e-16	1.98083e-16	PPARD/CX3CR1/BTK/SYK/CCL2/CCR5/PRKCA/CTSG/TLR4/LTF/TNF/PTAFR/IL1B/CD14/IL12B/CXCL3/CCL5/FCGR2B/CXCL5/IL1A/OPRK1/THPO/TNFSF4/BMP6/TNFAIP3/VIM/PLCG2/CSF3/WNT5A/IL6/DEFA4/CXCL1	32
BP	GO:1990266	neutrophil migration	24/337	130/18903	7.72047e-18	3.86675e-16	2.08262e-16	CD74/PIK3CG/CCL17/SYK/CCL2/VAV3/CCL7/CCL19/CSF3R/IL1B/CCL11/XCL1/CXCL3/CCL21/CCL5/CXCL5/IL1A/TGFB2/SLIT2/PRTN3/CCL22/CCL18/CXCL1/UMODL1	24
BP	GO:0071219	cellular response to molecule of bacterial origin	30/337	234/18903	2.31166e-17	1.14399e-15	6.16152e-16	PPARD/CX3CR1/CCL2/CCR5/PRKCA/CTSG/TLR4/LTF/TNF/PTAFR/IL1B/CD14/IL12B/CXCL3/CCL5/FCGR2B/CXCL5/IL1A/OPRK1/THPO/TNFSF4/BMP6/TNFAIP3/VIM/PLCG2/CSF3/WNT5A/IL6/DEFA4/CXCL1	30
BP	GO:0002253	activation of immune response	38/337	397/18903	2.58897e-17	1.24116e-15	6.68484e-16	CD79A/HLA-A/HLA-DPB1/PTPRC/NCR3/A2M/INPP5D/BTK/HLA-DQB1/SYK/VAV3/ITK/TLR4/SH2D1A/LCP2/CD247/CR2/GPR32/MICB/IL1B/IGHD/CD3E/COLEC10/LCK/FPR1/FCGR2B/C3/KLRC3/TRAC/CD3G/IGKC/KLRC4/FCN2/VAV2/CMTM3/PLCG2/NR4A3/MBL2	38
BP	GO:0002429	immune response-activating cell surface receptor signaling pathway	34/337	312/18903	2.59756e-17	1.24116e-15	6.68484e-16	CD79A/HLA-A/HLA-DPB1/PTPRC/NCR3/INPP5D/BTK/HLA-DQB1/SYK/VAV3/ITK/SH2D1A/LCP2/CD247/CR2/GPR32/MICB/IGHD/CD3E/COLEC10/LCK/FPR1/FCGR2B/KLRC3/TRAC/CD3G/IGKC/KLRC4/FCN2/VAV2/CMTM3/PLCG2/NR4A3/MBL2	34
BP	GO:0002757	immune response-activating signal transduction	34/337	312/18903	2.59756e-17	1.24116e-15	6.68484e-16	CD79A/HLA-A/HLA-DPB1/PTPRC/NCR3/INPP5D/BTK/HLA-DQB1/SYK/VAV3/ITK/SH2D1A/LCP2/CD247/CR2/GPR32/MICB/IGHD/CD3E/COLEC10/LCK/FPR1/FCGR2B/KLRC3/TRAC/CD3G/IGKC/KLRC4/FCN2/VAV2/CMTM3/PLCG2/NR4A3/MBL2	34
BP	GO:0002440	production of molecular mediator of immune response	35/337	333/18903	2.71257e-17	1.28138e-15	6.90147e-16	HLA-E/B2M/HLA-F/HLA-A/HLA-DPA1/HLA-DPB1/CD74/IL33/HLA-DOA/HLA-DQA1/HLA-DRA/PTPRC/HLA-DMA/HLA-G/CD40LG/BTK/HLA-DQB1/SYK/ANGPT1/TLR4/TLR7/TNF/CD244/IL1B/XCL1/FCGR2B/TNFSF4/TGFB2/PLCG2/NR4A3/WNT5A/IL18R1/IL4/IL13/IL6	35
BP	GO:0042742	defense response to bacterium	37/337	382/18903	4.74079e-17	2.21432e-15	1.19263e-15	HLA-E/SLPI/HLA-A/SEMG1/GBP2/TNFSF8/REG3G/SYK/LCN2/CTSG/TLR4/LTF/LYZ/TNF/COLEC12/CD4/DEFB119/IL1B/DEFB1/GNLY/DMBT1/IGHD/HTN3/IL12B/WFDC2/FGA/RNASE7/IGKC/FCN2/VGF/SFTPD/SLC11A1/AZU1/MPO/IL6/DEFA4/MBL2	37
BP	GO:0071222	cellular response to lipopolysaccharide	29/337	222/18903	4.81685e-17	2.22485e-15	1.1983e-15	PPARD/CX3CR1/CCL2/CCR5/PRKCA/CTSG/TLR4/LTF/TNF/PTAFR/IL1B/CD14/IL12B/CXCL3/CCL5/CXCL5/IL1A/OPRK1/THPO/TNFSF4/BMP6/TNFAIP3/VIM/PLCG2/CSF3/WNT5A/IL6/DEFA4/CXCL1	29
BP	GO:0050727	regulation of inflammatory response	38/337	414/18903	1.05237e-16	4.80735e-15	2.58923e-15	HLA-E/PPARD/HGF/IL33/PIK3CG/PTPRC/BTK/IL16/SYK/TEK/AGT/TNFSF18/NPY/TLR4/TLR7/IGF1/TNF/CMA1/IL1B/GPER1/IL12B/XCL1/CCL5/FCGR2B/C3/TNFSF4/RORA/TNFAIP3/PLCG2/WNT5A/IL4/FABP4/AGTR1/IL13/IL6/IL1RL2/TNC/ADIPOQ	38
BP	GO:0050764	regulation of phagocytosis	21/337	103/18903	1.09183e-16	4.9334e-15	2.65712e-15	PTPRC/BTK/IL2RB/SYK/CCL2/TNF/IL2RG/IL1B/COLEC10/FCGR2B/C3/FCN2/PLCG2/PTX3/PRTN3/PRKCG/SFTPD/SLC11A1/AZU1/MBL2/ADIPOQ	21
BP	GO:0031349	positive regulation of defense response	33/337	307/18903	1.18103e-16	5.27907e-15	2.84329e-15	HLA-E/HLA-F/IL33/SH2D1B/PIK3CG/NCR3/HLA-G/BTK/IL16/SYK/AGT/TNFSF18/TLR4/TLR7/SH2D1A/TNF/IL1B/IL12B/COLEC10/CCL5/C3/KLRC3/KLRC4/FCN2/TNFSF4/PLCG2/MMP12/WNT5A/FABP4/AGTR1/RAET1E/IL6/MBL2	33
BP	GO:0002718	regulation of cytokine production involved in immune response	22/337	118/18903	1.50486e-16	6.65498e-15	3.58435e-15	HLA-E/B2M/HLA-F/HLA-A/CD74/HLA-G/BTK/SYK/ANGPT1/TLR4/TLR7/TNF/IL1B/XCL1/TNFSF4/TGFB2/PLCG2/NR4A3/WNT5A/IL18R1/IL4/IL6	22
BP	GO:0002702	positive regulation of production of molecular mediator of immune response	23/337	133/18903	1.73013e-16	7.57068e-15	4.07754e-15	HLA-E/B2M/HLA-F/HLA-A/CD74/IL33/PTPRC/HLA-G/BTK/SYK/TLR4/TLR7/CD244/IL1B/XCL1/TNFSF4/PLCG2/NR4A3/WNT5A/IL18R1/IL4/IL13/IL6	23
BP	GO:0030593	neutrophil chemotaxis	21/337	106/18903	2.03188e-16	8.79848e-15	4.73884e-15	CD74/PIK3CG/CCL17/SYK/CCL2/VAV3/CCL7/CCL19/CSF3R/IL1B/CCL11/XCL1/CXCL3/CCL21/CCL5/CXCL5/TGFB2/SLIT2/CCL22/CCL18/CXCL1	21
BP	GO:0002367	cytokine production involved in immune response	22/337	120/18903	2.18891e-16	9.38073e-15	5.05243e-15	HLA-E/B2M/HLA-F/HLA-A/CD74/HLA-G/BTK/SYK/ANGPT1/TLR4/TLR7/TNF/IL1B/XCL1/TNFSF4/TGFB2/PLCG2/NR4A3/WNT5A/IL18R1/IL4/IL6	22
BP	GO:0019932	second-messenger-mediated signaling	33/337	314/18903	2.31682e-16	9.82759e-15	5.29311e-15	CX3CR1/PTPRC/XCR1/BTK/SYK/CCR5/NRG1/AGT/IGF1/CXCR6/TNF/CD4/CCR4/CCR3/DEFB1/CXCR3/SCTR/ACKR4/CD3E/FPR1/CCR9/SCT/ADCYAP1R1/OPRL1/NFATC4/NPPC/PLCG2/MAPT/AZU1/GAL/GIPR/AGTR1/GHRHR	33
BP	GO:0001913	T cell mediated cytotoxicity	16/337	51/18903	2.97842e-16	1.24562e-14	6.70887e-15	HLA-E/HLA-B/B2M/HLA-F/HLA-A/HLA-DRA/PTPRC/HLA-G/AZGP1/CD1C/CD1E/CD1B/IL12B/XCL1/FCGR2B/CD1A	16
BP	GO:0032640	tumor necrosis factor production	26/337	184/18903	3.0264e-16	1.24562e-14	6.70887e-15	HLA-E/CX3CR1/IL33/PTPRC/BTK/SYK/ANGPT1/CCL19/TLR4/IGF1/LTF/PTAFR/CYBB/CD14/IL12B/ORM1/IL1A/TNFAIP3/NFATC4/PLCG2/WNT5A/AZU1/IL4/IL6/LEP/ADIPOQ	26
BP	GO:0032680	regulation of tumor necrosis factor production	26/337	184/18903	3.0264e-16	1.24562e-14	6.70887e-15	HLA-E/CX3CR1/IL33/PTPRC/BTK/SYK/ANGPT1/CCL19/TLR4/IGF1/LTF/PTAFR/CYBB/CD14/IL12B/ORM1/IL1A/TNFAIP3/NFATC4/PLCG2/WNT5A/AZU1/IL4/IL6/LEP/ADIPOQ	26
BP	GO:0019730	antimicrobial humoral response	22/337	125/18903	5.4103e-16	2.20496e-14	1.18759e-14	HLA-E/SLPI/HLA-A/SEMG1/REG3G/CTSG/LTF/LYZ/DEFB1/GNLY/DMBT1/CXCL3/CXCL5/WFDC2/FGA/RNASE7/PRTN3/SFTPD/SLC11A1/AZU1/DEFA4/CXCL1	22
BP	GO:0071706	tumor necrosis factor superfamily cytokine production	26/337	189/18903	5.90407e-16	2.35992e-14	1.27105e-14	HLA-E/CX3CR1/IL33/PTPRC/BTK/SYK/ANGPT1/CCL19/TLR4/IGF1/LTF/PTAFR/CYBB/CD14/IL12B/ORM1/IL1A/TNFAIP3/NFATC4/PLCG2/WNT5A/AZU1/IL4/IL6/LEP/ADIPOQ	26
BP	GO:1903555	regulation of tumor necrosis factor superfamily cytokine production	26/337	189/18903	5.90407e-16	2.35992e-14	1.27105e-14	HLA-E/CX3CR1/IL33/PTPRC/BTK/SYK/ANGPT1/CCL19/TLR4/IGF1/LTF/PTAFR/CYBB/CD14/IL12B/ORM1/IL1A/TNFAIP3/NFATC4/PLCG2/WNT5A/AZU1/IL4/IL6/LEP/ADIPOQ	26
BP	GO:0002456	T cell mediated immunity	21/337	113/18903	8.00133e-16	3.16777e-14	1.70615e-14	HLA-E/HLA-B/B2M/HLA-F/HLA-A/HLA-DRA/PTPRC/HLA-G/AZGP1/CD1C/CD1E/IL1B/CD1B/IL12B/XCL1/FCGR2B/CD1A/TNFSF4/IL18R1/IL4/IL6	21
BP	GO:0050921	positive regulation of chemotaxis	23/337	144/18903	1.06122e-15	4.1618e-14	2.24153e-14	CX3CR1/CD74/MET/IL16/CCL7/CCL19/TNFSF18/CSF1/CSF1R/CCR4/XCL1/CCL21/CCL5/NTF3/SLIT2/PTN/PGF/WNT5A/ARTN/AZU1/IL4/IL6/IL34	23
BP	GO:0002366	leukocyte activation involved in immune response	31/337	293/18903	1.62296e-15	6.29308e-14	3.38943e-14	HLA-F/CX3CR1/CD74/IL33/SH2D1B/HLA-DRA/PIK3CG/PTPRC/CD40LG/BTK/ITGAL/SYK/CD1C/RORC/PTGDR/CCL19/TNFSF18/TLR4/CD244/PTAFR/IL12B/FCGR2B/TNFSF4/RORA/PLCG2/NR4A3/SLC11A1/IL18R1/IL4/IL13/IL6	31
BP	GO:0006909	phagocytosis	32/337	314/18903	1.63496e-15	6.29308e-14	3.38943e-14	PTPRC/MET/BTK/ITGAL/IL2RB/SYK/CCL2/VAV3/TLR4/TNF/COLEC12/IL2RG/IL1B/CD14/IGHD/COLEC10/FCGR2B/C3/IGKC/FCN2/VAV2/PLCG2/PTX3/PRTN3/PRKCG/SFTPD/SLC11A1/AZU1/LEP/MBL2/ADIPOQ/MARCO	32
BP	GO:0002720	positive regulation of cytokine production involved in immune response	18/337	79/18903	2.16272e-15	8.24808e-14	4.44239e-14	HLA-E/B2M/HLA-F/HLA-A/CD74/HLA-G/SYK/TLR4/TLR7/IL1B/XCL1/TNFSF4/PLCG2/NR4A3/WNT5A/IL18R1/IL4/IL6	18
BP	GO:0002263	cell activation involved in immune response	31/337	297/18903	2.37186e-15	8.88901e-14	4.78759e-14	HLA-F/CX3CR1/CD74/IL33/SH2D1B/HLA-DRA/PIK3CG/PTPRC/CD40LG/BTK/ITGAL/SYK/CD1C/RORC/PTGDR/CCL19/TNFSF18/TLR4/CD244/PTAFR/IL12B/FCGR2B/TNFSF4/RORA/PLCG2/NR4A3/SLC11A1/IL18R1/IL4/IL13/IL6	31
BP	GO:0002274	myeloid leukocyte activation	28/337	237/18903	2.37354e-15	8.88901e-14	4.78759e-14	CX3CR1/CD74/IL33/PIK3CG/PTPRC/BTK/SYK/PTGDR/NPY/CTSG/TLR4/LCP2/CSF1/TNF/PTAFR/CCL5/FCGR2B/RORA/PLCG2/MAPT/NR4A3/WNT5A/SLC11A1/AZU1/IL4/IL13/IL6/IL31RA	28
BP	GO:0097696	receptor signaling pathway via STAT	25/337	183/18903	2.57751e-15	9.56672e-14	5.15261e-14	PTPRC/EGF/PRLR/CCL2/CSF2RA/AGT/IL10RA/TNFSF18/CSF2RB/IGF1/TNF/CSF1R/IL12B/TNFRSF18/CCL5/FLT3/THPO/CRLF1/IL4/EPO/IL13/IL6/PRL/IL31RA/LEP	25
BP	GO:0050673	epithelial cell proliferation	39/337	481/18903	2.60636e-15	9.58816e-14	5.16416e-14	PROK1/B2M/PPARD/HGF/TGFA/REG3G/EGF/BTK/CCL2/TEK/PRKCA/IGF1/NRP2/TNF/TACR1/BMP2/FGF1/CCR3/CCL11/SLURP1/IL12B/BMP6/TGFB2/TNFAIP3/FGF9/PTN/GDF2/NR4A3/MMP12/PGF/WNT5A/AREG/PGR/LGR5/NODAL/AGTR1/IL6/PRL/LEP	39
BP	GO:0002478	antigen processing and presentation of exogenous peptide antigen	14/337	40/18903	3.82485e-15	1.39239e-13	7.49936e-14	HLA-E/B2M/HLA-F/HLA-A/HLA-DPA1/HLA-DPB1/CD74/HLA-DOA/HLA-DQA1/HLA-DRA/HLA-DMA/HLA-DQB1/CTSS/FCGR2B	14
BP	GO:0050678	regulation of epithelial cell proliferation	36/337	414/18903	3.85193e-15	1.39239e-13	7.49936e-14	PROK1/B2M/PPARD/TGFA/REG3G/EGF/BTK/CCL2/TEK/PRKCA/IGF1/NRP2/TNF/TACR1/BMP2/FGF1/CCR3/CCL11/SLURP1/IL12B/BMP6/TGFB2/TNFAIP3/FGF9/PTN/GDF2/NR4A3/MMP12/PGF/WNT5A/AREG/PGR/NODAL/AGTR1/PRL/LEP	36
BP	GO:0051047	positive regulation of secretion	31/337	304/18903	4.53894e-15	1.62658e-13	8.76073e-14	HLA-F/PPARD/SYK/SDC4/AGT/TLR4/IGF1/PTAFR/TACR1/BMP2/IL1B/GPER1/NR0B2/PCSK1/FGA/IL1A/OPRK1/SCT/BMP6/TGFB2/TFR2/OPRL1/GAL/GIPR/IL4/TRH/IL13/INHA/PRL/GHRHR/LEP	31
BP	GO:0050679	positive regulation of epithelial cell proliferation	27/337	224/18903	4.61373e-15	1.63925e-13	8.82897e-14	PROK1/TGFA/REG3G/EGF/BTK/TEK/PRKCA/IGF1/NRP2/TNF/TACR1/BMP2/FGF1/CCR3/CCL11/BMP6/TNFAIP3/FGF9/PTN/GDF2/NR4A3/MMP12/PGF/WNT5A/AREG/NODAL/AGTR1	27
BP	GO:0071674	mononuclear cell migration	26/337	206/18903	4.92723e-15	1.7358e-13	9.34899e-14	CX3CR1/PIK3CG/ITGAL/CCL17/CCL2/CCR5/CCL7/CCL19/TNFSF18/CTSG/CSF1/TNF/CSF1R/CCL11/XCL1/CCL21/CCL5/APOD/SLIT2/CCL22/WNT5A/ARTN/IL4/IL6/IL34/CCL18	26
BP	GO:0007259	receptor signaling pathway via JAK-STAT	24/337	172/18903	5.81343e-15	2.03079e-13	1.09378e-13	PTPRC/EGF/PRLR/CCL2/CSF2RA/AGT/IL10RA/TNFSF18/CSF2RB/IGF1/TNF/CSF1R/IL12B/TNFRSF18/CCL5/FLT3/CRLF1/IL4/EPO/IL13/IL6/PRL/IL31RA/LEP	24
BP	GO:0046631	alpha-beta T cell activation	24/337	174/18903	7.58172e-15	2.62644e-13	1.41459e-13	HLA-E/HLA-A/HLA-DRA/PTPRC/TNFSF8/SYK/EBI3/ITK/RORC/CCL19/TNFSF18/CD247/IL2RG/IL12B/XCL1/CD3E/TRAC/CD3G/TNFSF4/RORA/IL18R1/IL4/PRKCQ/IL6	24
BP	GO:1901342	regulation of vasculature development	33/337	355/18903	8.51818e-15	2.92645e-13	1.57618e-13	PROK1/HGF/CX3CR1/CYSLTR1/HLA-G/TEK/PRKCA/AGT/TNF/CYBB/SEMA6A/FGF1/CMA1/IL1B/SEMA3E/CCR3/CCL11/FASLG/C3/IL1A/TGFB2/NR2E1/TNFAIP3/ADM2/GDF2/PGF/WNT5A/ANGPTL4/NODAL/ANGPTL7/IL6/PRL/LEP	33
BP	GO:0002685	regulation of leukocyte migration	27/337	231/18903	9.96446e-15	3.39527e-13	1.82868e-13	CX3CR1/CD74/IL33/KITLG/CCL2/CCL7/CCL19/TNFSF18/CSF1/TNF/PTAFR/CSF1R/TACR1/CXCR3/XCL1/CCL21/TNFRSF18/CCL5/IL1A/APOD/SLIT2/PTN/PGF/WNT5A/IL4/IL6/IL34	27
BP	GO:0050766	positive regulation of phagocytosis	17/337	74/18903	1.1351e-14	3.83626e-13	2.0662e-13	PTPRC/BTK/IL2RB/CCL2/TNF/IL2RG/IL1B/COLEC10/FCGR2B/C3/FCN2/PLCG2/PTX3/SFTPD/SLC11A1/AZU1/MBL2	17
BP	GO:0002526	acute inflammatory response	20/337	114/18903	1.26252e-14	4.2325e-13	2.27961e-13	HLA-E/PIK3CG/A2M/REG3G/BTK/NPY/TNF/TACR1/IL1B/FCGR2B/C3/ORM1/IL1A/TNFSF4/TFR2/IL4/EPO/IL6/IL31RA/MBL2	20
BP	GO:0002831	regulation of response to biotic stimulus	33/337	361/18903	1.38178e-14	4.59524e-13	2.47498e-13	HLA-E/HLA-B/HLA-F/HLA-A/SH2D1B/NCR3/HLA-G/A2M/SYK/PRKCA/TLR4/SH2D1A/LTF/MICB/NCR1/IL1B/CD14/IL12B/COLEC10/CCL5/FCGR2B/KLRC3/KLRC4/FCN2/BMP6/TNFAIP3/PLCG2/MMP12/WNT5A/IL4/RAET1E/LEP/MBL2	33
BP	GO:0032102	negative regulation of response to external stimulus	36/337	436/18903	1.90021e-14	6.26917e-13	3.37656e-13	HLA-E/HLA-B/HLA-F/HLA-A/PPARD/HGF/PTPRC/HLA-G/A2M/SYK/CCL2/TEK/NPY/IGF1/LTF/TNF/SEMA6A/MICB/SEMA3E/GPER1/IL12B/FCGR2B/FGA/SEMA6B/SLIT2/RORA/TNFAIP3/SLIT1/MMP12/WNT5A/SEMA6D/IL4/SEMA3B/IL13/LEP/ADIPOQ	36
BP	GO:0019724	B cell mediated immunity	26/337	218/18903	1.94633e-14	6.37078e-13	3.43128e-13	HLA-E/B2M/HLA-DPA1/HLA-DPB1/CD74/HLA-DOA/HLA-DQA1/HLA-DRA/PTPRC/HLA-DMA/HLA-G/CD40LG/INPP5D/BTK/HLA-DQB1/CSF2RB/CR2/TNF/IGHD/XCL1/FCGR2B/C3/IGKC/TNFSF4/IL4/MBL2	26
BP	GO:1903532	positive regulation of secretion by cell	29/337	278/18903	1.99491e-14	6.47878e-13	3.48945e-13	HLA-F/PPARD/SYK/SDC4/AGT/TLR4/IGF1/PTAFR/TACR1/BMP2/IL1B/GPER1/NR0B2/PCSK1/FGA/IL1A/OPRK1/SCT/BMP6/TGFB2/TFR2/GAL/GIPR/IL4/TRH/IL13/INHA/GHRHR/LEP	29
BP	GO:0002687	positive regulation of leukocyte migration	22/337	148/18903	2.11675e-14	6.82117e-13	3.67386e-13	CX3CR1/CD74/KITLG/CCL7/CCL19/TNFSF18/CSF1/TNF/PTAFR/CSF1R/TACR1/XCL1/CCL21/TNFRSF18/CCL5/IL1A/PTN/PGF/WNT5A/IL4/IL6/IL34	22
BP	GO:0032760	positive regulation of tumor necrosis factor production	19/337	105/18903	3.25352e-14	1.03412e-12	5.56975e-13	HLA-E/IL33/PTPRC/BTK/SYK/CCL19/TLR4/PTAFR/CYBB/CD14/IL12B/ORM1/IL1A/NFATC4/PLCG2/WNT5A/AZU1/IL6/LEP	19
BP	GO:0045765	regulation of angiogenesis	32/337	349/18903	3.25884e-14	1.03412e-12	5.56975e-13	PROK1/HGF/CX3CR1/CYSLTR1/HLA-G/TEK/PRKCA/AGT/TNF/CYBB/SEMA6A/FGF1/CMA1/IL1B/SEMA3E/CCR3/CCL11/FASLG/C3/IL1A/TGFB2/NR2E1/TNFAIP3/ADM2/GDF2/PGF/WNT5A/ANGPTL4/NODAL/IL6/PRL/LEP	32
BP	GO:1903557	positive regulation of tumor necrosis factor superfamily cytokine production	19/337	109/18903	6.6409e-14	2.09138e-12	1.12641e-12	HLA-E/IL33/PTPRC/BTK/SYK/CCL19/TLR4/PTAFR/CYBB/CD14/IL12B/ORM1/IL1A/NFATC4/PLCG2/WNT5A/AZU1/IL6/LEP	19
BP	GO:0034341	response to interferon-gamma	21/337	140/18903	6.96899e-14	2.1782e-12	1.17317e-12	HLA-DPA1/CD74/GBP2/CIITA/CCL17/CCL2/CCL7/CCL19/TLR4/TNF/CCL11/IL12B/XCL1/FASLG/CCL21/CCL5/VIM/CCL22/WNT5A/SLC11A1/CCL18	21
BP	GO:0032635	interleukin-6 production	23/337	176/18903	9.11631e-14	2.80715e-12	1.51192e-12	HLA-B/HGF/CD74/IL33/INPP5D/BTK/IL16/SYK/TLR4/TLR7/TNF/PTAFR/IL1B/ORM1/IL1A/TNFSF4/TNFAIP3/IL17D/PLCG2/WNT5A/IL6/IL1RL2/LEP	23
BP	GO:0032675	regulation of interleukin-6 production	23/337	176/18903	9.11631e-14	2.80715e-12	1.51192e-12	HLA-B/HGF/CD74/IL33/INPP5D/BTK/IL16/SYK/TLR4/TLR7/TNF/PTAFR/IL1B/ORM1/IL1A/TNFSF4/TNFAIP3/IL17D/PLCG2/WNT5A/IL6/IL1RL2/LEP	23
BP	GO:0030217	T cell differentiation	29/337	296/18903	1.0142e-13	3.10003e-12	1.66967e-12	B2M/CD74/HLA-DOA/HLA-DRA/PTPRC/HLA-G/TNFSF8/SYK/ITK/RORC/CCL19/TNFSF18/CD4/IL2RG/IL1B/IL7/IL12B/CD3E/LCK/CCR9/IL1A/CD3G/TNFSF4/RORA/IL18R1/IL4/IL6/IL1RL2/LEP	29
BP	GO:0016064	immunoglobulin mediated immune response	25/337	215/18903	1.12964e-13	3.42767e-12	1.84614e-12	HLA-E/B2M/HLA-DPA1/HLA-DPB1/CD74/HLA-DOA/HLA-DQA1/HLA-DRA/PTPRC/HLA-DMA/CD40LG/INPP5D/BTK/HLA-DQB1/CSF2RB/CR2/TNF/IGHD/XCL1/FCGR2B/C3/IGKC/TNFSF4/IL4/MBL2	25
BP	GO:1903706	regulation of hemopoiesis	34/337	413/18903	1.15219e-13	3.47076e-12	1.86934e-12	HLA-B/B2M/CD74/HLA-DOA/HLA-DRA/PTPRC/HLA-G/INPP5D/BTK/KITLG/SYK/PRKCA/CCL19/TNFSF18/TLR4/CSF1/LTF/TNF/CD4/IL2RG/CSF3R/IL7/IL12B/FCGR2B/THPO/TNFSF4/PTN/IL17D/CSF3/IL4/INHA/IL34/IL1RL2/ADIPOQ	34
BP	GO:0032755	positive regulation of interleukin-6 production	18/337	99/18903	1.43058e-13	4.27836e-12	2.30431e-12	CD74/IL33/BTK/IL16/SYK/TLR4/TLR7/TNF/PTAFR/IL1B/IL1A/TNFSF4/IL17D/PLCG2/WNT5A/IL6/IL1RL2/LEP	18
BP	GO:0002715	regulation of natural killer cell mediated immunity	14/337	51/18903	1.78524e-13	5.3009e-12	2.85505e-12	HLA-E/HLA-B/HLA-F/HLA-A/SH2D1B/NCR3/HLA-G/SH2D1A/NCR1/IL12B/KLRC3/KLRC4/RAET1E/LEP	14
BP	GO:0045088	regulation of innate immune response	26/337	240/18903	1.92932e-13	5.68808e-12	3.06358e-12	HLA-E/HLA-B/HLA-F/HLA-A/SH2D1B/NCR3/HLA-G/A2M/SYK/TLR4/SH2D1A/NCR1/IL12B/COLEC10/CCL5/FCGR2B/KLRC3/KLRC4/FCN2/TNFAIP3/PLCG2/MMP12/WNT5A/RAET1E/LEP/MBL2	26
BP	GO:0002475	antigen processing and presentation via MHC class Ib	9/337	14/18903	3.02836e-13	8.86543e-12	4.77489e-12	HLA-E/B2M/HLA-F/HLA-G/AZGP1/CD1C/CD1E/CD1B/CD1A	9
BP	GO:0032609	interferon-gamma production	19/337	119/18903	3.47348e-13	1.00273e-11	5.40066e-12	HLA-A/HLA-DPA1/HLA-DPB1/IL33/EBI3/TLR4/TLR7/TNF/CD244/IL1B/CD14/IL12B/XCL1/CD3E/TNFSF4/WNT5A/SLC11A1/IL18R1/INHA	19
BP	GO:0032649	regulation of interferon-gamma production	19/337	119/18903	3.47348e-13	1.00273e-11	5.40066e-12	HLA-A/HLA-DPA1/HLA-DPB1/IL33/EBI3/TLR4/TLR7/TNF/CD244/IL1B/CD14/IL12B/XCL1/CD3E/TNFSF4/WNT5A/SLC11A1/IL18R1/INHA	19
BP	GO:0002228	natural killer cell mediated immunity	16/337	77/18903	3.73235e-13	1.0627e-11	5.72365e-12	HLA-E/HLA-B/HLA-F/HLA-A/SH2D1B/NCR3/HLA-G/SH2D1A/NCR1/IL12B/KLRC3/KLRC4/ULBP3/ULBP1/RAET1E/LEP	16
BP	GO:0032729	positive regulation of interferon-gamma production	16/337	77/18903	3.73235e-13	1.0627e-11	5.72365e-12	HLA-A/HLA-DPA1/HLA-DPB1/EBI3/TLR4/TLR7/TNF/CD244/IL1B/CD14/IL12B/CD3E/TNFSF4/WNT5A/SLC11A1/IL18R1	16
BP	GO:0046879	hormone secretion	28/337	291/18903	4.30062e-13	1.21617e-11	6.55024e-12	PPARD/BTK/AGT/TNF/ACVR1C/TACR1/IL1B/GPER1/NR0B2/CCL5/MC4R/FGA/OPRK1/SSTR5/SCT/BMP6/IL11/TFR2/VGF/GAL/GIPR/TRH/AGTR1/INHA/IL6/GHRHR/LEP/ADIPOQ	28
BP	GO:0042531	positive regulation of tyrosine phosphorylation of STAT protein	15/337	67/18903	6.40771e-13	1.79979e-11	9.6936e-12	TNFSF18/IGF1/TNF/CSF1R/IL12B/TNFRSF18/CCL5/FLT3/CRLF1/IL4/EPO/IL13/IL6/IL31RA/LEP	15
BP	GO:0046883	regulation of hormone secretion	25/337	234/18903	7.8104e-13	2.17905e-11	1.17363e-11	PPARD/AGT/TNF/ACVR1C/TACR1/IL1B/GPER1/NR0B2/CCL5/FGA/OPRK1/SSTR5/SCT/BMP6/IL11/TFR2/GAL/GIPR/TRH/AGTR1/INHA/IL6/GHRHR/LEP/ADIPOQ	25
BP	GO:0042116	macrophage activation	18/337	109/18903	8.07602e-13	2.23814e-11	1.20545e-11	CX3CR1/CD74/IL33/PTPRC/SYK/TLR4/TNF/FCGR2B/RORA/PLCG2/MAPT/WNT5A/SLC11A1/AZU1/IL4/IL13/IL6/IL31RA	18
BP	GO:0009914	hormone transport	28/337	300/18903	9.10365e-13	2.50622e-11	1.34984e-11	PPARD/BTK/AGT/TNF/ACVR1C/TACR1/IL1B/GPER1/NR0B2/CCL5/MC4R/FGA/OPRK1/SSTR5/SCT/BMP6/IL11/TFR2/VGF/GAL/GIPR/TRH/AGTR1/INHA/IL6/GHRHR/LEP/ADIPOQ	28
BP	GO:1901214	regulation of neuron death	29/337	325/18903	1.09131e-12	2.9846e-11	1.6075e-11	HLA-F/CX3CR1/CCL2/ANGPT1/NPY/TLR4/CSF1/TNF/SEMA3E/FASLG/CCL5/FCGR2B/NTF3/CRLF1/CNTFR/TGFB2/NFATC4/MAPT/NR4A2/DKK1/NR4A3/CSF3/FGF8/WNT5A/PRKCG/FGF21/EPO/BDNF/IL13	29
BP	GO:0042269	regulation of natural killer cell mediated cytotoxicity	13/337	47/18903	1.19012e-12	3.23355e-11	1.74158e-11	HLA-E/HLA-B/HLA-F/HLA-A/NCR3/HLA-G/SH2D1A/NCR1/IL12B/KLRC3/KLRC4/RAET1E/LEP	13
BP	GO:0002548	monocyte chemotaxis	15/337	71/18903	1.5894e-12	4.29036e-11	2.31077e-11	CX3CR1/CCL17/CCL2/CCL7/CCL19/TNFSF18/CTSG/CCL11/XCL1/CCL21/CCL5/SLIT2/CCL22/IL6/CCL18	15
BP	GO:0019886	antigen processing and presentation of exogenous peptide antigen via MHC class II	11/337	30/18903	1.98449e-12	5.32227e-11	2.86656e-11	B2M/HLA-DPA1/HLA-DPB1/CD74/HLA-DOA/HLA-DQA1/HLA-DRA/HLA-DMA/HLA-DQB1/CTSS/FCGR2B	11
BP	GO:2000351	regulation of endothelial cell apoptotic process	14/337	60/18903	2.07289e-12	5.52373e-11	2.97506e-11	HLA-G/CD40LG/CCL2/TEK/ANGPT1/TNF/GPER1/FASLG/FGA/TNFAIP3/ANGPTL4/FGF21/IL4/IL13	14
BP	GO:0007204	positive regulation of cytosolic calcium ion concentration	23/337	205/18903	2.37881e-12	6.29853e-11	3.39237e-11	CX3CR1/CYSLTR1/PIK3CG/XCR1/CALCR/CCR5/PTGDR/AGT/CXCR6/GPR32/TACR1/CCR4/CCR3/GPER1/CXCR3/ACKR4/FPR1/CCR9/ADCYAP1R1/OPRL1/GIPR/EPO/AGTR1	23
BP	GO:0043405	regulation of MAP kinase activity	22/337	186/18903	2.48267e-12	6.53193e-11	3.51808e-11	PIK3CG/PTPRC/TGFA/EGF/KITLG/SYK/CCL19/AGT/TLR4/TNF/BMP2/FGF1/IL1B/FLT3/NTF3/BMP7/DKK1/WNT5A/NOX4/IL34/ADIPOQ/CBLC	22
BP	GO:0042267	natural killer cell mediated cytotoxicity	15/337	74/18903	3.01993e-12	7.89549e-11	4.25249e-11	HLA-E/HLA-B/HLA-F/HLA-A/NCR3/HLA-G/SH2D1A/NCR1/IL12B/KLRC3/KLRC4/ULBP3/ULBP1/RAET1E/LEP	15
BP	GO:0002833	positive regulation of response to biotic stimulus	22/337	188/18903	3.08543e-12	8.01633e-11	4.31757e-11	HLA-E/HLA-F/SH2D1B/NCR3/HLA-G/SYK/PRKCA/TLR4/SH2D1A/CD14/IL12B/COLEC10/CCL5/KLRC3/KLRC4/FCN2/BMP6/PLCG2/MMP12/WNT5A/RAET1E/MBL2	22
BP	GO:0019722	calcium-mediated signaling	23/337	208/18903	3.22711e-12	8.33235e-11	4.48778e-11	CX3CR1/PTPRC/XCR1/BTK/SYK/CCR5/NRG1/IGF1/CXCR6/TNF/CD4/CCR4/CCR3/DEFB1/CXCR3/ACKR4/CD3E/CCR9/NFATC4/PLCG2/MAPT/AZU1/AGTR1	23
BP	GO:0071346	cellular response to interferon-gamma	18/337	118/18903	3.28283e-12	8.42392e-11	4.53709e-11	HLA-DPA1/GBP2/CCL17/CCL2/CCL7/CCL19/TLR4/TNF/CCL11/IL12B/XCL1/FASLG/CCL21/CCL5/VIM/CCL22/WNT5A/CCL18	18
BP	GO:1902105	regulation of leukocyte differentiation	28/337	317/18903	3.48427e-12	8.88595e-11	4.78594e-11	HLA-B/CD74/HLA-DOA/HLA-DRA/PTPRC/HLA-G/INPP5D/BTK/KITLG/SYK/PRKCA/CCL19/TNFSF18/TLR4/CSF1/LTF/TNF/CD4/IL2RG/IL7/IL12B/FCGR2B/TNFSF4/IL4/INHA/IL34/IL1RL2/ADIPOQ	28
BP	GO:0032757	positive regulation of interleukin-8 production	14/337	63/18903	4.25763e-12	1.07921e-10	5.81257e-11	CD74/SYK/TLR4/TLR7/TNF/CD244/IL1B/CD14/IL17D/GDF2/WNT5A/IL6/LEP/ADIPOQ	14
BP	GO:0070997	neuron death	30/337	368/18903	4.43949e-12	1.11848e-10	6.02412e-11	HLA-F/CX3CR1/CCL2/ANGPT1/NPY/TLR4/CSF1/TNF/THRB/SEMA3E/FASLG/CCL5/FCGR2B/NTF3/CRLF1/CNTFR/TGFB2/NFATC4/MAPT/NR4A2/DKK1/NR4A3/CSF3/FGF8/WNT5A/PRKCG/FGF21/EPO/BDNF/IL13	30
BP	GO:0002698	negative regulation of immune effector process	18/337	122/18903	5.87899e-12	1.47223e-10	7.92937e-11	HLA-E/HLA-B/HLA-F/HLA-A/CX3CR1/IL33/PTPRC/HLA-G/A2M/ANGPT1/TNFSF18/CR2/TNF/XCL1/FCGR2B/TNFSF4/TGFB2/IL4	18
BP	GO:0048660	regulation of smooth muscle cell proliferation	21/337	175/18903	5.97109e-12	1.48634e-10	8.00536e-11	PPARD/AGT/TLR4/IGF1/TNF/PTAFR/TACR1/BMP2/GPER1/VIPR2/IL12B/CCL5/APOD/TNFAIP3/FGF9/NPPC/NR4A3/IL13/IL6/ELN/ADIPOQ	21
BP	GO:0046641	positive regulation of alpha-beta T cell proliferation	10/337	25/18903	7.32168e-12	1.81168e-10	9.75765e-11	HLA-E/HLA-A/PTPRC/SYK/EBI3/IL12B/XCL1/CD3E/TNFSF4/PRKCQ	10
BP	GO:0070555	response to interleukin-1	19/337	141/18903	7.8372e-12	1.92548e-10	1.03706e-10	GBP2/CCL17/CCL2/PRKCA/CCL7/CCL19/IL1B/CCL11/XCL1/CCL21/PCSK1/CCL5/RORA/CCL22/EPO/IL1R2/IL6/IL1RL2/CCL18	19
BP	GO:0007631	feeding behavior	17/337	108/18903	7.87423e-12	1.92548e-10	1.03706e-10	AGT/NPY/TACR1/CCK/MC4R/OPRK1/CNTFR/PYY/OPRL1/ADM2/AGRP/NR4A3/GAL/TRH/PPY/LEP/GALR3	17
BP	GO:0072577	endothelial cell apoptotic process	14/337	66/18903	8.40094e-12	2.04226e-10	1.09996e-10	HLA-G/CD40LG/CCL2/TEK/ANGPT1/TNF/GPER1/FASLG/FGA/TNFAIP3/ANGPTL4/FGF21/IL4/IL13	14
BP	GO:0048659	smooth muscle cell proliferation	21/337	179/18903	9.26335e-12	2.23882e-10	1.20582e-10	PPARD/AGT/TLR4/IGF1/TNF/PTAFR/TACR1/BMP2/GPER1/VIPR2/IL12B/CCL5/APOD/TNFAIP3/FGF9/NPPC/NR4A3/IL13/IL6/ELN/ADIPOQ	21
BP	GO:0002495	antigen processing and presentation of peptide antigen via MHC class II	11/337	34/18903	9.75198e-12	2.34329e-10	1.26209e-10	B2M/HLA-DPA1/HLA-DPB1/CD74/HLA-DOA/HLA-DQA1/HLA-DRA/HLA-DMA/HLA-DQB1/CTSS/FCGR2B	11
BP	GO:0014068	positive regulation of phosphatidylinositol 3-kinase signaling	15/337	80/18903	9.9754e-12	2.3832e-10	1.28359e-10	PPARD/HGF/EGF/TEK/ANGPT1/AGT/IGF1/TNF/SEMA3E/GPER1/CCL5/FLT3/TGFB2/CSF3/LEP	15
BP	GO:0009620	response to fungus	14/337	67/18903	1.04508e-11	2.48251e-10	1.33707e-10	CX3CR1/BTK/SYK/CTSG/TLR4/LTF/DEFB119/GNLY/HTN3/RNASE7/PLCG2/PTX3/MPO/DEFA4	14
BP	GO:0007218	neuropeptide signaling pathway	17/337	110/18903	1.06844e-11	2.52358e-10	1.35919e-10	SSTR1/CYSLTR1/SORT1/CYSLTR2/NPY/OPRK1/SSTR5/LTB4R/MC2R/RXFP3/LTB4R2/PYY/OPRL1/AGRP/GAL/PPY/GALR3	17
BP	GO:0002688	regulation of leukocyte chemotaxis	18/337	127/18903	1.18019e-11	2.77177e-10	1.49287e-10	CX3CR1/CD74/CCL2/CCL7/CCL19/TNFSF18/CSF1/CSF1R/XCL1/CCL21/CCL5/SLIT2/PTN/PGF/WNT5A/IL4/IL6/IL34	18
BP	GO:0002483	antigen processing and presentation of endogenous peptide antigen	9/337	19/18903	1.29165e-11	3.01163e-10	1.62205e-10	HLA-E/HLA-B/B2M/HLA-F/HLA-C/HLA-A/HLA-DRA/HLA-G/AZGP1	9
BP	GO:0045089	positive regulation of innate immune response	19/337	145/18903	1.2968e-11	3.01163e-10	1.62205e-10	HLA-E/HLA-F/SH2D1B/NCR3/HLA-G/SYK/TLR4/SH2D1A/IL12B/COLEC10/CCL5/KLRC3/KLRC4/FCN2/PLCG2/MMP12/WNT5A/RAET1E/MBL2	19
BP	GO:0042509	regulation of tyrosine phosphorylation of STAT protein	15/337	82/18903	1.45088e-11	3.35074e-10	1.8047e-10	TNFSF18/IGF1/TNF/CSF1R/IL12B/TNFRSF18/CCL5/FLT3/CRLF1/IL4/EPO/IL13/IL6/IL31RA/LEP	15
BP	GO:0002690	positive regulation of leukocyte chemotaxis	16/337	97/18903	1.5687e-11	3.6028e-10	1.94046e-10	CX3CR1/CD74/CCL7/CCL19/TNFSF18/CSF1/CSF1R/XCL1/CCL21/CCL5/PTN/PGF/WNT5A/IL4/IL6/IL34	16
BP	GO:0033002	muscle cell proliferation	24/337	247/18903	1.74312e-11	3.9814e-10	2.14437e-10	PPARD/HGF/ANGPT1/AGT/TLR4/IGF1/TNF/PTAFR/TACR1/BMP2/GPER1/VIPR2/IL12B/CCL5/TGFB2/APOD/TNFAIP3/FGF9/NPPC/NR4A3/IL13/IL6/ELN/ADIPOQ	24
BP	GO:0032722	positive regulation of chemokine production	14/337	70/18903	1.96666e-11	4.46744e-10	2.40615e-10	CD74/IL33/SYK/TLR4/TLR7/TNF/CSF1R/IL1B/IL7/TNFSF4/WNT5A/AZU1/IL6/ADIPOQ	14
BP	GO:0002504	antigen processing and presentation of peptide or polysaccharide antigen via MHC class II	11/337	36/18903	1.98374e-11	4.48174e-10	2.41385e-10	B2M/HLA-DPA1/HLA-DPB1/CD74/HLA-DOA/HLA-DQA1/HLA-DRA/HLA-DMA/HLA-DQB1/CTSS/FCGR2B	11
BP	GO:0071902	positive regulation of protein serine/threonine kinase activity	23/337	229/18903	2.36899e-11	5.32319e-10	2.86705e-10	PIK3CG/PTPRC/TGFA/CD40LG/EGF/KITLG/SYK/CCL19/TLR4/LTF/TNF/CSF1R/BMP2/FGF1/IL1B/BMPR1B/FLT3/NTF3/DKK1/WNT5A/NOX4/IL34/ADIPOQ	23
BP	GO:0010721	negative regulation of cell development	21/337	188/18903	2.38491e-11	5.33014e-10	2.8708e-10	B2M/IGF1/LTF/TNF/SEMA6A/IL1B/SEMA3E/CCL11/IL1A/BMP7/SEMA6B/NR2E1/SLIT1/NFATC4/PTN/NPPC/WNT5A/SEMA6D/NODAL/SEMA3B/IL6	21
BP	GO:0031342	negative regulation of cell killing	10/337	28/18903	2.80305e-11	6.23116e-10	3.35608e-10	HLA-E/HLA-B/HLA-F/HLA-A/CX3CR1/PTPRC/HLA-G/FCGR2B/IL4/IL13	10
BP	GO:0050777	negative regulation of immune response	21/337	190/18903	2.92061e-11	6.45797e-10	3.47824e-10	HLA-E/HLA-B/HLA-F/HLA-A/IL33/PTPRC/HLA-G/A2M/INPP5D/SYK/TNFSF18/NPY/CR2/IL12B/XCL1/PDCD1/FCGR2B/TNFSF4/TNFAIP3/MMP12/IL4	21
BP	GO:0043406	positive regulation of MAP kinase activity	17/337	117/18903	2.95693e-11	6.50368e-10	3.50286e-10	PIK3CG/PTPRC/TGFA/EGF/KITLG/SYK/CCL19/TLR4/TNF/FGF1/IL1B/FLT3/NTF3/DKK1/WNT5A/NOX4/IL34	17
BP	GO:0007260	tyrosine phosphorylation of STAT protein	15/337	86/18903	2.97331e-11	6.50529e-10	3.50373e-10	TNFSF18/IGF1/TNF/CSF1R/IL12B/TNFRSF18/CCL5/FLT3/CRLF1/IL4/EPO/IL13/IL6/IL31RA/LEP	15
BP	GO:0019216	regulation of lipid metabolic process	28/337	347/18903	3.0179e-11	6.56827e-10	3.53765e-10	FABP3/PPARD/CD74/PIK3CG/VAV3/TEK/RORC/CCL19/TNF/BMP2/FGF1/IL1B/GPER1/CCL21/FLT3/C3/IL1A/SCT/VAV2/BMP6/APOD/RORA/PLCG2/NR4A3/GAL/FGF21/LEP/ADIPOQ	28
BP	GO:0050830	defense response to Gram-positive bacterium	17/337	118/18903	3.39937e-11	7.36e-10	3.96407e-10	HLA-E/HLA-A/GBP2/TNFSF8/REG3G/CTSG/LYZ/TNF/DEFB119/IL1B/DEFB1/DMBT1/RNASE7/FCN2/IL6/DEFA4/MBL2	17
BP	GO:0050729	positive regulation of inflammatory response	19/337	154/18903	3.79627e-11	8.17673e-10	4.40396e-10	HLA-E/IL33/PIK3CG/BTK/IL16/AGT/TNFSF18/TLR4/TLR7/TNF/IL1B/IL12B/C3/TNFSF4/PLCG2/WNT5A/FABP4/AGTR1/IL6	19
BP	GO:0002381	immunoglobulin production involved in immunoglobulin-mediated immune response	14/337	74/18903	4.35176e-11	9.32487e-10	5.02235e-10	B2M/HLA-DPA1/HLA-DPB1/HLA-DOA/HLA-DQA1/HLA-DRA/PTPRC/HLA-DMA/CD40LG/BTK/HLA-DQB1/XCL1/TNFSF4/IL4	14
BP	GO:0050829	defense response to Gram-negative bacterium	15/337	89/18903	4.96343e-11	1.0581e-09	5.6989e-10	CTSG/TLR4/LTF/LYZ/CD4/DEFB119/DEFB1/DMBT1/IL12B/RNASE7/FCN2/SLC11A1/AZU1/IL6/DEFA4	15
BP	GO:0022612	gland morphogenesis	17/337	123/18903	6.68651e-11	1.41815e-09	7.63814e-10	HGF/TGFA/CSF1/TNF/CSF1R/FGF1/CCL11/BMP7/TGFB2/TNFAIP3/PTN/FGF8/WNT5A/AREG/PGR/IL6/TNC	17
BP	GO:0019731	antibacterial humoral response	13/337	63/18903	6.85271e-11	1.44603e-09	7.78825e-10	HLA-E/SLPI/HLA-A/SEMG1/CTSG/LTF/DEFB1/DMBT1/WFDC2/FGA/RNASE7/SFTPD/DEFA4	13
BP	GO:0001667	ameboidal-type cell migration	33/337	492/18903	7.03083e-11	1.47612e-09	7.95033e-10	PPARD/PIK3CG/MET/EGF/S100A2/KITLG/SDC4/TEK/PRKCA/ANGPT1/AGT/NRP2/TNF/ACVR1C/TACR1/SEMA6A/FGF1/SEMA3E/BMP7/TGFB2/SEMA6B/LTB4R2/SLIT2/NR2E1/PTN/GDF2/PLCG2/FGF8/WNT5A/SEMA6D/IL4/NODAL/SEMA3B	33
BP	GO:0006968	cellular defense response	12/337	52/18903	9.23672e-11	1.9295e-09	1.03922e-09	CX3CR1/IL33/HLA-G/CCR5/ITK/SH2D1A/NCR1/CCR3/GNLY/KLRC3/CCR9/IL1RL2	12
BP	GO:0032733	positive regulation of interleukin-10 production	11/337	41/18903	9.63395e-11	2.00242e-09	1.0785e-09	HGF/CD40LG/SYK/TLR4/IL12B/XCL1/TNFSF4/PLCG2/IL4/IL13/IL6	11
BP	GO:0032613	interleukin-10 production	13/337	65/18903	1.04103e-10	2.14236e-09	1.15387e-09	HGF/CD40LG/BTK/SYK/TLR4/IL12B/XCL1/FCGR2B/TNFSF4/PLCG2/IL4/IL13/IL6	13
BP	GO:0032653	regulation of interleukin-10 production	13/337	65/18903	1.04103e-10	2.14236e-09	1.15387e-09	HGF/CD40LG/BTK/SYK/TLR4/IL12B/XCL1/FCGR2B/TNFSF4/PLCG2/IL4/IL13/IL6	13
BP	GO:0002399	MHC class II protein complex assembly	8/337	16/18903	1.06781e-10	2.17593e-09	1.17195e-09	B2M/HLA-DPA1/HLA-DPB1/HLA-DOA/HLA-DQA1/HLA-DRA/HLA-DMA/HLA-DQB1	8
BP	GO:0002503	peptide antigen assembly with MHC class II protein complex	8/337	16/18903	1.06781e-10	2.17593e-09	1.17195e-09	B2M/HLA-DPA1/HLA-DPB1/HLA-DOA/HLA-DQA1/HLA-DRA/HLA-DMA/HLA-DQB1	8
BP	GO:1904035	regulation of epithelial cell apoptotic process	16/337	110/18903	1.11995e-10	2.27104e-09	1.22318e-09	HLA-G/CD40LG/CCL2/TEK/ANGPT1/TNF/GPER1/FASLG/FGA/TNFAIP3/ANGPTL4/FGF21/IL4/IL13/IL6/UMODL1	16
BP	GO:1902107	positive regulation of leukocyte differentiation	20/337	184/18903	1.18235e-10	2.37442e-09	1.27885e-09	CD74/HLA-DRA/PTPRC/HLA-G/INPP5D/BTK/KITLG/SYK/PRKCA/CCL19/CSF1/TNF/CD4/IL2RG/IL7/IL12B/TNFSF4/IL4/IL34/IL1RL2	20
BP	GO:1903708	positive regulation of hemopoiesis	20/337	184/18903	1.18235e-10	2.37442e-09	1.27885e-09	CD74/HLA-DRA/PTPRC/HLA-G/INPP5D/BTK/KITLG/SYK/PRKCA/CCL19/CSF1/TNF/CD4/IL2RG/IL7/IL12B/TNFSF4/IL4/IL34/IL1RL2	20
BP	GO:0032735	positive regulation of interleukin-12 production	11/337	42/18903	1.28464e-10	2.56031e-09	1.37898e-09	HLA-G/CD40LG/IL16/SYK/CCL19/TLR4/LTB/IL12B/TNFSF4/PLCG2/LEP	11
BP	GO:0071347	cellular response to interleukin-1	16/337	111/18903	1.28767e-10	2.56031e-09	1.37898e-09	GBP2/CCL17/CCL2/CCL7/CCL19/IL1B/CCL11/XCL1/CCL21/CCL5/RORA/CCL22/IL1R2/IL6/IL1RL2/CCL18	16
BP	GO:0002717	positive regulation of natural killer cell mediated immunity	10/337	32/18903	1.2934e-10	2.56031e-09	1.37898e-09	HLA-E/HLA-F/SH2D1B/NCR3/HLA-G/SH2D1A/IL12B/KLRC3/KLRC4/RAET1E	10
BP	GO:0001818	negative regulation of cytokine production	28/337	371/18903	1.43747e-10	2.83201e-09	1.52531e-09	HLA-F/HGF/CX3CR1/IL33/PTPRC/INPP5D/BTK/ANGPT1/TLR4/IGF1/LTF/TNF/IL12B/XCL1/FCGR2B/ORM1/TNFSF4/TGFB2/APOD/TNFAIP3/SFTPD/SLC11A1/IL4/IL1R2/IL13/INHA/IL6/ADIPOQ	28
BP	GO:0002285	lymphocyte activation involved in immune response	21/337	207/18903	1.47993e-10	2.90193e-09	1.56297e-09	HLA-F/CD74/HLA-DRA/PTPRC/CD40LG/ITGAL/CD1C/RORC/CCL19/TNFSF18/TLR4/CD244/IL12B/FCGR2B/TNFSF4/RORA/PLCG2/SLC11A1/IL18R1/IL4/IL6	21
BP	GO:0045766	positive regulation of angiogenesis	20/337	187/18903	1.58466e-10	3.07824e-09	1.65793e-09	HGF/CX3CR1/CYSLTR1/TEK/PRKCA/CYBB/FGF1/CMA1/IL1B/CCR3/CCL11/C3/IL1A/NR2E1/ADM2/GDF2/PGF/WNT5A/ANGPTL4/NODAL	20
BP	GO:1904018	positive regulation of vasculature development	20/337	187/18903	1.58466e-10	3.07824e-09	1.65793e-09	HGF/CX3CR1/CYSLTR1/TEK/PRKCA/CYBB/FGF1/CMA1/IL1B/CCR3/CCL11/C3/IL1A/NR2E1/ADM2/GDF2/PGF/WNT5A/ANGPTL4/NODAL	20
BP	GO:0032147	activation of protein kinase activity	18/337	148/18903	1.59337e-10	3.08076e-09	1.65929e-09	TGFA/EGF/PRLR/ANGPT1/NRG1/AGT/IGF1/FGF1/IL12B/CCL5/NTF3/TGFB2/WNT5A/SLC11A1/AREG/IL4/EPO/LEP	18
BP	GO:0034612	response to tumor necrosis factor	23/337	254/18903	1.92655e-10	3.70772e-09	1.99696e-09	GBP2/CCL17/SYK/CCL2/CCL7/CCL19/TNFSF18/TNF/GPER1/CD14/CCL11/XCL1/CCL21/TNFRSF18/CCL5/RORA/TNFAIP3/TNFRSF19/TNFSF13B/CCL22/FABP4/CCL18/ADIPOQ	23
BP	GO:0019885	antigen processing and presentation of endogenous peptide antigen via MHC class I	8/337	17/18903	1.9858e-10	3.80413e-09	2.04889e-09	HLA-E/HLA-B/B2M/HLA-F/HLA-C/HLA-A/HLA-G/AZGP1	8
BP	GO:0032642	regulation of chemokine production	15/337	98/18903	2.05599e-10	3.92054e-09	2.11159e-09	CD74/IL33/SYK/TLR4/TLR7/TNF/CSF1R/IL1B/IL7/TNFSF4/APOD/WNT5A/AZU1/IL6/ADIPOQ	15
BP	GO:0071356	cellular response to tumor necrosis factor	22/337	234/18903	2.34961e-10	4.45997e-09	2.40213e-09	GBP2/CCL17/SYK/CCL2/CCL7/CCL19/TNFSF18/TNF/GPER1/CCL11/XCL1/CCL21/TNFRSF18/CCL5/RORA/TNFAIP3/TNFRSF19/TNFSF13B/CCL22/FABP4/CCL18/ADIPOQ	22
BP	GO:0032602	chemokine production	15/337	99/18903	2.38447e-10	4.50556e-09	2.42668e-09	CD74/IL33/SYK/TLR4/TLR7/TNF/CSF1R/IL1B/IL7/TNFSF4/APOD/WNT5A/AZU1/IL6/ADIPOQ	15
BP	GO:0045834	positive regulation of lipid metabolic process	18/337	154/18903	3.08971e-10	5.81172e-09	3.13018e-09	FABP3/PPARD/CD74/VAV3/TEK/CCL19/TNF/FGF1/IL1B/CCL21/FLT3/IL1A/SCT/VAV2/BMP6/NR4A3/FGF21/ADIPOQ	18
BP	GO:1904019	epithelial cell apoptotic process	17/337	137/18903	3.77327e-10	7.06554e-09	3.80548e-09	PIK3CG/HLA-G/CD40LG/CCL2/TEK/ANGPT1/TNF/GPER1/FASLG/FGA/TNFAIP3/ANGPTL4/FGF21/IL4/IL13/IL6/UMODL1	17
BP	GO:0043491	protein kinase B signaling	21/337	218/18903	3.88258e-10	7.23762e-09	3.89816e-09	CX3CR1/PIK3CG/HLA-G/CALCR/MET/EGF/CCL2/TEK/ANGPT1/NRG1/CCL19/IGF1/TNF/IL1B/GPER1/CCL21/CCL5/THPO/CSF3/NOX4/LEP	21
BP	GO:0042060	wound healing	30/337	442/18903	4.06524e-10	7.5443e-09	4.06333e-09	PPARD/IL33/PIK3CG/DUOX2/TGFA/CD40LG/REG3G/SYK/VAV3/SDC4/PRKCA/NRG1/CTSG/TLR4/IGF1/TNF/FGF1/LCK/FGA/IL1A/VAV2/TGFB2/TNFAIP3/PLCG2/MMP12/WNT5A/SERPIND1/SLC11A1/PRKCQ/IL6	30
BP	GO:0023061	signal release	31/337	470/18903	4.13607e-10	7.64161e-09	4.11575e-09	PPARD/BTK/SYK/AGT/TNF/ACVR1C/TACR1/IL1B/GPER1/NR0B2/CCL5/MC4R/FGA/IL1A/OPRK1/SSTR5/SCT/BMP6/IL11/TFR2/VGF/PRKCG/GAL/GIPR/TRH/AGTR1/INHA/IL6/GHRHR/LEP/ADIPOQ	31
BP	GO:0032677	regulation of interleukin-8 production	15/337	103/18903	4.23926e-10	7.76355e-09	4.18143e-09	CD74/PTPRC/SYK/TLR4/TLR7/TNF/CD244/IL1B/CD14/IL17D/GDF2/WNT5A/IL6/LEP/ADIPOQ	15
BP	GO:0051897	positive regulation of protein kinase B signaling	16/337	120/18903	4.23942e-10	7.76355e-09	4.18143e-09	CX3CR1/PIK3CG/CALCR/MET/EGF/TEK/ANGPT1/NRG1/CCL19/IGF1/TNF/CCL21/THPO/CSF3/NOX4/LEP	16
BP	GO:0046635	positive regulation of alpha-beta T cell activation	13/337	73/18903	4.81134e-10	8.76309e-09	4.71978e-09	HLA-E/HLA-A/HLA-DRA/PTPRC/SYK/EBI3/CCL19/IL2RG/IL12B/XCL1/CD3E/TNFSF4/PRKCQ	13
BP	GO:0050919	negative chemotaxis	11/337	47/18903	4.8274e-10	8.76309e-09	4.71978e-09	NRG1/NRP2/LGR6/SEMA6A/SEMA3E/SEMA6B/SLIT2/SLIT1/WNT5A/SEMA6D/SEMA3B	11
BP	GO:0032637	interleukin-8 production	15/337	104/18903	4.8747e-10	8.77235e-09	4.72476e-09	CD74/PTPRC/SYK/TLR4/TLR7/TNF/CD244/IL1B/CD14/IL17D/GDF2/WNT5A/IL6/LEP/ADIPOQ	15
BP	GO:0042100	B cell proliferation	15/337	104/18903	4.8747e-10	8.77235e-09	4.72476e-09	CD79A/CD74/PTPRC/CD40LG/INPP5D/BTK/PRLR/VAV3/TLR4/CR2/IL7/FCGR2B/TNFSF13B/IL4/IL13	15
BP	GO:0002444	myeloid leukocyte mediated immunity	15/337	107/18903	7.34178e-10	1.31551e-08	7.08528e-09	HLA-E/CX3CR1/PIK3CG/BTK/SYK/PTGDR/CTSG/PTAFR/FCGR2B/C3/NR4A3/AZU1/IL4/IL13/IL6	15
BP	GO:0031348	negative regulation of defense response	23/337	272/18903	7.46339e-10	1.33156e-08	7.17173e-09	HLA-E/HLA-B/HLA-F/HLA-A/PPARD/HGF/PTPRC/HLA-G/A2M/SYK/TEK/NPY/IGF1/MICB/GPER1/IL12B/FCGR2B/RORA/TNFAIP3/MMP12/IL4/IL13/ADIPOQ	23
BP	GO:0050864	regulation of B cell activation	20/337	204/18903	7.5156e-10	1.33514e-08	7.19104e-09	CD74/PTPRC/INPP5D/BTK/SYK/PRLR/VAV3/TLR4/IL2RG/IL7/IGHD/FCGR2B/IGKC/TNFSF4/TNFAIP3/TNFSF13B/IL4/IL13/INHA/IL6	20
BP	GO:0042113	B cell activation	26/337	350/18903	9.4027e-10	1.66328e-08	8.95836e-09	CD79A/CD74/PTPRC/CD40LG/INPP5D/BTK/SYK/PRLR/VAV3/TLR4/CR2/IL2RG/IL7/IGHD/FCGR2B/FLT3/IGKC/TNFSF4/IL11/TNFAIP3/PLCG2/TNFSF13B/IL4/IL13/INHA/IL6	26
BP	GO:0050851	antigen receptor-mediated signaling pathway	22/337	252/18903	9.67068e-10	1.70343e-08	9.17464e-09	CD79A/HLA-A/HLA-DPB1/PTPRC/INPP5D/BTK/HLA-DQB1/SYK/VAV3/ITK/SH2D1A/LCP2/CD247/IGHD/CD3E/LCK/FCGR2B/TRAC/CD3G/IGKC/CMTM3/PLCG2	22
BP	GO:0002396	MHC protein complex assembly	8/337	20/18903	9.82032e-10	1.71526e-08	9.23832e-09	B2M/HLA-DPA1/HLA-DPB1/HLA-DOA/HLA-DQA1/HLA-DRA/HLA-DMA/HLA-DQB1	8
BP	GO:0002501	peptide antigen assembly with MHC protein complex	8/337	20/18903	9.82032e-10	1.71526e-08	9.23832e-09	B2M/HLA-DPA1/HLA-DPB1/HLA-DOA/HLA-DQA1/HLA-DRA/HLA-DMA/HLA-DQB1	8
BP	GO:0031663	lipopolysaccharide-mediated signaling pathway	12/337	63/18903	1.00187e-09	1.72812e-08	9.30762e-09	CCL2/PRKCA/TLR4/LTF/TNF/PTAFR/IL1B/CD14/CCL5/BMP6/TNFAIP3/PLCG2	12
BP	GO:0032615	interleukin-12 production	12/337	63/18903	1.00187e-09	1.72812e-08	9.30762e-09	HLA-B/HLA-G/CD40LG/IL16/SYK/CCL19/TLR4/LTB/IL12B/TNFSF4/PLCG2/LEP	12
BP	GO:0032655	regulation of interleukin-12 production	12/337	63/18903	1.00187e-09	1.72812e-08	9.30762e-09	HLA-B/HLA-G/CD40LG/IL16/SYK/CCL19/TLR4/LTB/IL12B/TNFSF4/PLCG2/LEP	12
BP	GO:0050918	positive chemotaxis	12/337	64/18903	1.21354e-09	2.08459e-08	1.12275e-08	HGF/MET/IL16/ANGPT1/CCR4/COLEC10/CCL5/NTF3/PGF/WNT5A/ARTN/AZU1	12
BP	GO:0014066	regulation of phosphatidylinositol 3-kinase signaling	15/337	111/18903	1.24115e-09	2.12324e-08	1.14357e-08	PPARD/HGF/EGF/TEK/ANGPT1/AGT/IGF1/TNF/SEMA3E/GPER1/CCL5/FLT3/TGFB2/CSF3/LEP	15
BP	GO:0048247	lymphocyte chemotaxis	12/337	65/18903	1.46474e-09	2.49546e-08	1.34404e-08	PIK3CG/CCL17/CCL2/CCL7/CCL19/CCL11/XCL1/CCL21/CCL5/CCL22/WNT5A/CCL18	12
BP	GO:0051961	negative regulation of nervous system development	17/337	151/18903	1.73938e-09	2.95126e-08	1.58954e-08	B2M/TNF/SEMA6A/IL1B/SEMA3E/CCL11/BMP7/SEMA6B/NR2E1/SLIT1/NFATC4/PTN/DKK1/WNT5A/SEMA6D/SEMA3B/IL6	17
BP	GO:0060389	pathway-restricted SMAD protein phosphorylation	12/337	66/18903	1.76188e-09	2.9773e-08	1.60356e-08	BMP2/AMHR2/GDF10/BMP7/BMP6/TGFB2/LEFTY1/GDF2/DKK1/INHBE/NODAL/INHA	12
BP	GO:0071622	regulation of granulocyte chemotaxis	11/337	53/18903	1.92039e-09	3.23022e-08	1.73979e-08	CD74/CCL19/TNFSF18/CSF1/CSF1R/XCL1/CCL21/CCL5/SLIT2/IL4/IL34	11
BP	GO:0030183	B cell differentiation	17/337	152/18903	1.9271e-09	3.23022e-08	1.73979e-08	CD79A/PTPRC/CD40LG/INPP5D/BTK/SYK/CR2/IL2RG/IL7/FCGR2B/FLT3/IL11/PLCG2/TNFSF13B/IL4/INHA/IL6	17
BP	GO:0046634	regulation of alpha-beta T cell activation	15/337	115/18903	2.05191e-09	3.42562e-08	1.84503e-08	HLA-E/HLA-A/HLA-DRA/PTPRC/SYK/EBI3/CCL19/TNFSF18/IL2RG/IL12B/XCL1/CD3E/TNFSF4/IL4/PRKCQ	15
BP	GO:0030888	regulation of B cell proliferation	12/337	67/18903	2.11231e-09	3.51234e-08	1.89174e-08	CD74/PTPRC/INPP5D/BTK/PRLR/VAV3/TLR4/IL7/FCGR2B/TNFSF13B/IL4/IL13	12
BP	GO:1901215	negative regulation of neuron death	20/337	218/18903	2.41019e-09	3.9917e-08	2.14992e-08	HLA-F/CX3CR1/CCL2/ANGPT1/NPY/CSF1/SEMA3E/NTF3/CRLF1/CNTFR/NFATC4/NR4A2/NR4A3/CSF3/FGF8/PRKCG/FGF21/EPO/BDNF/IL13	20
BP	GO:0043434	response to peptide hormone	28/337	421/18903	2.51577e-09	4.15002e-08	2.23519e-08	SORT1/CYSLTR2/REG3G/AGT/ACVR1C/CYBB/IL1B/GPER1/PCSK1/MC4R/OPRK1/BMP7/VGF/NR4A2/AGRP/NR4A3/TSHR/AREG/GAL/FGF21/PRKCQ/AGTR1/GHRHR/LEP/ADIPOQ/UMODL1/GCGR/GLP2R	28
BP	GO:0050871	positive regulation of B cell activation	17/337	155/18903	2.60802e-09	4.27149e-08	2.30061e-08	CD74/PTPRC/INPP5D/BTK/SYK/PRLR/VAV3/TLR4/IL2RG/IL7/IGHD/IGKC/TNFSF4/TNFSF13B/IL4/IL13/IL6	17
BP	GO:0002377	immunoglobulin production	20/337	219/18903	2.60995e-09	4.27149e-08	2.30061e-08	HLA-E/B2M/HLA-DPA1/HLA-DPB1/IL33/HLA-DOA/HLA-DQA1/HLA-DRA/PTPRC/HLA-DMA/CD40LG/BTK/HLA-DQB1/TNF/XCL1/FCGR2B/TNFSF4/IL4/IL13/IL6	20
BP	GO:0071692	protein localization to extracellular region	26/337	368/18903	2.7179e-09	4.42353e-08	2.3825e-08	PPARD/TLR4/IGF1/TNF/ACVR1C/IL1B/GPER1/IL12B/NR0B2/PCSK1/CCL5/MC4R/FGA/IL1A/SSTR5/BMP6/TGFB2/LTBP1/VGF/GAL/GIPR/TRH/IL13/IL6/PPY/LEP	26
BP	GO:0071900	regulation of protein serine/threonine kinase activity	27/337	395/18903	2.72414e-09	4.42353e-08	2.3825e-08	PIK3CG/PTPRC/TGFA/CD40LG/EGF/KITLG/SYK/CCL19/AGT/TLR4/LTF/TNF/CSF1R/BMP2/FGF1/IL1B/BMPR1B/FLT3/NTF3/BMP7/TNFAIP3/DKK1/WNT5A/NOX4/IL34/ADIPOQ/CBLC	27
BP	GO:0002695	negative regulation of leukocyte activation	19/337	198/18903	2.88536e-09	4.6671e-08	2.51369e-08	HLA-F/CD74/PTPRC/HLA-G/INPP5D/BTK/SDC4/TNFSF18/CTSG/GPER1/XCL1/FCGR2B/TNFSF4/TNFAIP3/SFTPD/GAL/IL4/INHA/IL31RA	19
BP	GO:0038093	Fc receptor signaling pathway	11/337	55/18903	2.92023e-09	4.70519e-08	2.5342e-08	PTPRC/BTK/SYK/VAV3/CD247/LCK/FCGR2B/VAV2/PLCG2/NR4A3/PRKCQ	11
BP	GO:0002286	T cell activation involved in immune response	15/337	118/18903	2.95106e-09	4.73651e-08	2.55107e-08	CD74/HLA-DRA/ITGAL/CD1C/RORC/CCL19/TNFSF18/IL12B/FCGR2B/TNFSF4/RORA/SLC11A1/IL18R1/IL4/IL6	15
BP	GO:0048754	branching morphogenesis of an epithelial tube	17/337	157/18903	3.17829e-09	5.0816e-08	2.73693e-08	MET/EGF/AGT/CSF1/TNF/BMP2/FGF1/SEMA3E/CCL11/BMP7/SLIT2/NFATC4/GDF2/FGF8/WNT5A/AREG/PGR	17
BP	GO:0048015	phosphatidylinositol-mediated signaling	18/337	178/18903	3.2857e-09	5.2332e-08	2.81858e-08	PPARD/HGF/PIK3CG/EGF/TEK/ANGPT1/AGT/IGF1/TNF/PTAFR/CSF1R/SEMA3E/GPER1/CCL5/FLT3/TGFB2/CSF3/LEP	18
BP	GO:0007188	adenylate cyclase-modulating G protein-coupled receptor signaling pathway	21/337	248/18903	4.05986e-09	6.44154e-08	3.46939e-08	CALCR/PRKCA/CCR3/GPER1/VIPR2/SCTR/FPR1/MC4R/OPRK1/ADCYAP1R1/MC2R/OPRL1/ADM2/TSHR/GIPR/UCN2/GHRHR/GALR3/GCGR/MARCO/GLP2R	21
BP	GO:0046640	regulation of alpha-beta T cell proliferation	10/337	44/18903	4.11446e-09	6.50335e-08	3.50269e-08	HLA-E/HLA-A/PTPRC/SYK/EBI3/IL12B/XCL1/CD3E/TNFSF4/PRKCQ	10
BP	GO:0048017	inositol lipid-mediated signaling	18/337	182/18903	4.68936e-09	7.38397e-08	3.97698e-08	PPARD/HGF/PIK3CG/EGF/TEK/ANGPT1/AGT/IGF1/TNF/PTAFR/CSF1R/SEMA3E/GPER1/CCL5/FLT3/TGFB2/CSF3/LEP	18
BP	GO:0001936	regulation of endothelial cell proliferation	18/337	183/18903	5.11773e-09	8.02807e-08	4.32389e-08	PROK1/EGF/CCL2/TEK/PRKCA/NRP2/TNF/BMP2/CCR3/CCL11/IL12B/BMP6/GDF2/PGF/WNT5A/AGTR1/PRL/LEP	18
BP	GO:0030890	positive regulation of B cell proliferation	10/337	45/18903	5.20704e-09	8.107e-08	4.3664e-08	CD74/PTPRC/BTK/PRLR/VAV3/TLR4/IL7/TNFSF13B/IL4/IL13	10
BP	GO:0046427	positive regulation of receptor signaling pathway via JAK-STAT	10/337	45/18903	5.20704e-09	8.107e-08	4.3664e-08	PRLR/AGT/IL10RA/TNF/IL12B/CCL5/IL4/IL6/PRL/LEP	10
BP	GO:0071675	regulation of mononuclear cell migration	15/337	123/18903	5.27852e-09	8.18761e-08	4.40982e-08	CX3CR1/CCL2/CCL7/TNFSF18/CSF1/TNF/CSF1R/XCL1/CCL21/CCL5/APOD/SLIT2/WNT5A/IL4/IL34	15
BP	GO:0150076	neuroinflammatory response	12/337	73/18903	5.88462e-09	9.09381e-08	4.8979e-08	CX3CR1/IL33/PTPRC/IGF1/TNF/IL1B/PLCG2/MAPT/AZU1/IL4/IL13/IL6	12
BP	GO:0072676	lymphocyte migration	15/337	124/18903	5.90917e-09	9.09793e-08	4.90011e-08	PIK3CG/ITGAL/CCL17/CCL2/CCL7/CCL19/CCL11/XCL1/CCL21/CCL5/APOD/CCL22/WNT5A/ARTN/CCL18	15
BP	GO:1905952	regulation of lipid localization	18/337	185/18903	6.08463e-09	9.30138e-08	5.0097e-08	FABP3/PPARD/CETP/EGF/SYK/AGT/TNF/IL1B/FASLG/C3/IL1A/BMP6/GAL/AGTR1/IL6/PLTP/LEP/ADIPOQ	18
BP	GO:0002790	peptide secretion	20/337	230/18903	6.08606e-09	9.30138e-08	5.0097e-08	PPARD/CD74/TNF/ACVR1C/IL1B/GPER1/NR0B2/CCL5/MC4R/FGA/SSTR5/SCT/TFR2/VGF/GAL/GIPR/TRH/IL6/GHRHR/LEP	20
BP	GO:0042088	T-helper 1 type immune response	10/337	46/18903	6.54909e-09	9.97236e-08	5.37108e-08	IL33/EBI3/CCL19/TLR4/IL1B/IL12B/XCL1/TNFSF4/SLC11A1/IL18R1	10
BP	GO:0014065	phosphatidylinositol 3-kinase signaling	16/337	145/18903	7.06038e-09	1.07117e-07	5.76928e-08	PPARD/HGF/PIK3CG/EGF/TEK/ANGPT1/AGT/IGF1/TNF/SEMA3E/GPER1/CCL5/FLT3/TGFB2/CSF3/LEP	16
BP	GO:0009306	protein secretion	25/337	359/18903	7.42245e-09	1.122e-07	6.04308e-08	PPARD/TLR4/IGF1/TNF/ACVR1C/IL1B/GPER1/IL12B/NR0B2/PCSK1/CCL5/MC4R/FGA/IL1A/SSTR5/BMP6/TGFB2/VGF/GAL/GIPR/TRH/IL13/IL6/PPY/LEP	25
BP	GO:0050708	regulation of protein secretion	21/337	257/18903	7.65853e-09	1.1535e-07	6.21269e-08	PPARD/TLR4/IGF1/TNF/ACVR1C/IL1B/GPER1/IL12B/NR0B2/PCSK1/CCL5/FGA/IL1A/SSTR5/BMP6/TGFB2/GIPR/TRH/IL13/IL6/LEP	21
BP	GO:0001911	negative regulation of leukocyte mediated cytotoxicity	8/337	25/18903	7.8004e-09	1.16604e-07	6.28024e-08	HLA-E/HLA-B/HLA-F/HLA-A/CX3CR1/PTPRC/HLA-G/FCGR2B	8
BP	GO:0050768	negative regulation of neurogenesis	16/337	146/18903	7.80274e-09	1.16604e-07	6.28024e-08	B2M/TNF/SEMA6A/IL1B/SEMA3E/CCL11/BMP7/SEMA6B/NR2E1/SLIT1/NFATC4/PTN/WNT5A/SEMA6D/SEMA3B/IL6	16
BP	GO:0035592	establishment of protein localization to extracellular region	25/337	360/18903	7.84872e-09	1.16604e-07	6.28024e-08	PPARD/TLR4/IGF1/TNF/ACVR1C/IL1B/GPER1/IL12B/NR0B2/PCSK1/CCL5/MC4R/FGA/IL1A/SSTR5/BMP6/TGFB2/VGF/GAL/GIPR/TRH/IL13/IL6/PPY/LEP	25
BP	GO:0061138	morphogenesis of a branching epithelium	18/337	188/18903	7.85399e-09	1.16604e-07	6.28024e-08	HGF/MET/EGF/AGT/CSF1/TNF/BMP2/FGF1/SEMA3E/CCL11/BMP7/SLIT2/NFATC4/GDF2/FGF8/WNT5A/AREG/PGR	18
BP	GO:0046633	alpha-beta T cell proliferation	10/337	47/18903	8.18864e-09	1.21139e-07	6.52453e-08	HLA-E/HLA-A/PTPRC/SYK/EBI3/IL12B/XCL1/CD3E/TNFSF4/PRKCQ	10
BP	GO:0051896	regulation of protein kinase B signaling	18/337	189/18903	8.54186e-09	1.25917e-07	6.78183e-08	CX3CR1/PIK3CG/HLA-G/CALCR/MET/EGF/TEK/ANGPT1/NRG1/CCL19/IGF1/TNF/GPER1/CCL21/THPO/CSF3/NOX4/LEP	18
BP	GO:0002637	regulation of immunoglobulin production	12/337	76/18903	9.46512e-09	1.39034e-07	7.48831e-08	HLA-E/IL33/PTPRC/CD40LG/BTK/TNF/XCL1/FCGR2B/TNFSF4/IL4/IL13/IL6	12
BP	GO:0002673	regulation of acute inflammatory response	10/337	48/18903	1.01813e-08	1.48505e-07	7.99842e-08	HLA-E/PIK3CG/BTK/NPY/TNF/IL1B/FCGR2B/C3/IL4/IL6	10
BP	GO:0006953	acute-phase response	10/337	48/18903	1.01813e-08	1.48505e-07	7.99842e-08	A2M/REG3G/TNF/IL1B/ORM1/IL1A/TFR2/EPO/IL6/MBL2	10
BP	GO:0051781	positive regulation of cell division	13/337	93/18903	1.05095e-08	1.52755e-07	8.22733e-08	PROK1/TGFA/FGF1/IL1B/IL1A/SSTR5/TGFB2/RXFP3/FGF9/PTN/PGF/FGF8/BIRC5	13
BP	GO:0048545	response to steroid hormone	24/337	339/18903	1.08726e-08	1.57482e-07	8.48195e-08	PPARD/A2M/CALCR/TNF/PTAFR/TACR1/CYBB/GPER1/PCSK1/FLT3/SSTR5/BMP7/BMP6/TGFB2/SLIT2/NR2E1/NR4A3/AREG/PGR/EPO/NODAL/IL6/GHRHR/ADIPOQ	24
BP	GO:0009755	hormone-mediated signaling pathway	18/337	192/18903	1.09523e-08	1.58006e-07	8.51014e-08	SSTR1/PPARD/RARB/PRLR/THRB/GPER1/SSTR5/BMP7/NR2E1/AGRP/NR4A3/TSHR/UCN2/PGR/TRH/NODAL/GHRHR/GCGR	18
BP	GO:0002726	positive regulation of T cell cytokine production	8/337	26/18903	1.10933e-08	1.58006e-07	8.51014e-08	B2M/HLA-A/IL1B/XCL1/TNFSF4/IL18R1/IL4/IL6	8
BP	GO:0046629	gamma-delta T cell activation	8/337	26/18903	1.10933e-08	1.58006e-07	8.51014e-08	PTPRC/SYK/ITK/CD247/MICB/CD3E/CCR9/CD3G	8
BP	GO:0043030	regulation of macrophage activation	11/337	62/18903	1.10988e-08	1.58006e-07	8.51014e-08	CD74/IL33/PTPRC/TLR4/FCGR2B/RORA/WNT5A/IL4/IL13/IL6/IL31RA	11
BP	GO:0060393	regulation of pathway-restricted SMAD protein phosphorylation	11/337	62/18903	1.10988e-08	1.58006e-07	8.51014e-08	BMP2/GDF10/BMP7/BMP6/TGFB2/LEFTY1/GDF2/DKK1/INHBE/NODAL/INHA	11
BP	GO:0010862	positive regulation of pathway-restricted SMAD protein phosphorylation	10/337	49/18903	1.25914e-08	1.78035e-07	9.58891e-08	BMP2/GDF10/BMP7/BMP6/TGFB2/LEFTY1/GDF2/INHBE/NODAL/INHA	10
BP	GO:1904894	positive regulation of receptor signaling pathway via STAT	10/337	49/18903	1.25914e-08	1.78035e-07	9.58891e-08	PRLR/AGT/IL10RA/TNF/IL12B/CCL5/IL4/IL6/PRL/LEP	10
BP	GO:0048846	axon extension involved in axon guidance	9/337	37/18903	1.31092e-08	1.84104e-07	9.91578e-08	NRP2/SEMA6A/SEMA3E/SEMA6B/SLIT2/SLIT1/WNT5A/SEMA6D/SEMA3B	9
BP	GO:1902284	neuron projection extension involved in neuron projection guidance	9/337	37/18903	1.31092e-08	1.84104e-07	9.91578e-08	NRP2/SEMA6A/SEMA3E/SEMA6B/SLIT2/SLIT1/WNT5A/SEMA6D/SEMA3B	9
BP	GO:0002573	myeloid leukocyte differentiation	19/337	218/18903	1.41478e-08	1.98021e-07	1.06654e-07	CD74/INPP5D/KITLG/PRKCA/CCL19/TLR4/CSF1/LTF/TNF/CSF1R/CD4/IL12B/CSF3/PRTN3/IL4/INHA/IL34/IL31RA/ADIPOQ	19
BP	GO:0002437	inflammatory response to antigenic stimulus	12/337	79/18903	1.48944e-08	2.07772e-07	1.11906e-07	HLA-E/CYSLTR1/A2M/BTK/SYK/NPY/TNF/IL12B/FCGR2B/IL5RA/C3/IL31RA	12
BP	GO:0045954	positive regulation of natural killer cell mediated cytotoxicity	8/337	27/18903	1.55209e-08	2.15787e-07	1.16222e-07	HLA-E/HLA-F/NCR3/SH2D1A/IL12B/KLRC3/KLRC4/RAET1E	8
BP	GO:0045807	positive regulation of endocytosis	13/337	96/18903	1.55768e-08	2.15843e-07	1.16252e-07	B2M/EGF/SYK/ANGPT1/CCL19/CD14/CCL21/C3/NTF3/TFR2/PLCG2/WNT5A/IL4	13
BP	GO:0002369	T cell cytokine production	9/337	38/18903	1.691e-08	2.32765e-07	1.25366e-07	B2M/HLA-F/HLA-A/IL1B/XCL1/TNFSF4/IL18R1/IL4/IL6	9
BP	GO:0002724	regulation of T cell cytokine production	9/337	38/18903	1.691e-08	2.32765e-07	1.25366e-07	B2M/HLA-F/HLA-A/IL1B/XCL1/TNFSF4/IL18R1/IL4/IL6	9
BP	GO:0035710	CD4-positive, alpha-beta T cell activation	14/337	115/18903	1.75914e-08	2.41344e-07	1.29987e-07	HLA-DRA/RORC/CCL19/TNFSF18/IL2RG/IL12B/XCL1/CD3E/TNFSF4/RORA/IL18R1/IL4/PRKCQ/IL6	14
BP	GO:0050866	negative regulation of cell activation	19/337	221/18903	1.76746e-08	2.41688e-07	1.30172e-07	HLA-F/CD74/PTPRC/HLA-G/INPP5D/BTK/SDC4/TNFSF18/CTSG/GPER1/XCL1/FCGR2B/TNFSF4/TNFAIP3/SFTPD/GAL/IL4/INHA/IL31RA	19
BP	GO:0001935	endothelial cell proliferation	18/337	199/18903	1.92031e-08	2.61729e-07	1.40966e-07	PROK1/EGF/CCL2/TEK/PRKCA/NRP2/TNF/BMP2/CCR3/CCL11/IL12B/BMP6/GDF2/PGF/WNT5A/AGTR1/PRL/LEP	18
BP	GO:0042755	eating behavior	9/337	39/18903	2.16407e-08	2.93989e-07	1.58341e-07	NPY/TACR1/CCK/MC4R/OPRK1/OPRL1/AGRP/TRH/LEP	9
BP	GO:0097191	extrinsic apoptotic signaling pathway	19/337	224/18903	2.19965e-08	2.97033e-07	1.59981e-07	HGF/IL33/SORT1/PTPRC/KITLG/AGT/IGF1/TNFRSF10C/TNF/IL1B/BMPR1B/GPER1/IL7/FASLG/FGA/IL1A/TGFB2/TNFAIP3/IL4	19
BP	GO:0046632	alpha-beta T cell differentiation	14/337	117/18903	2.20077e-08	2.97033e-07	1.59981e-07	HLA-DRA/TNFSF8/SYK/ITK/RORC/CCL19/TNFSF18/IL2RG/IL12B/TNFSF4/RORA/IL18R1/IL4/IL6	14
BP	GO:0030101	natural killer cell activation	13/337	99/18903	2.27547e-08	3.06121e-07	1.64876e-07	HLA-E/HLA-F/PTPRC/NCR3/IL2RB/CD244/NCR1/IL12B/KLRC3/IL18R1/ULBP3/ULBP1/LEP	13
BP	GO:0030072	peptide hormone secretion	19/337	225/18903	2.36408e-08	3.17015e-07	1.70744e-07	PPARD/TNF/ACVR1C/IL1B/GPER1/NR0B2/CCL5/MC4R/FGA/SSTR5/SCT/TFR2/VGF/GAL/GIPR/TRH/IL6/GHRHR/LEP	19
BP	GO:0071695	anatomical structure maturation	20/337	250/18903	2.50465e-08	3.34549e-07	1.80187e-07	CX3CR1/SEMG1/BTK/CCL19/IGF1/LTF/BMP2/DEFB1/CCL21/C3/TGFB2/NPPC/NR4A2/WNT5A/GAL/RAC3/PGR/EPO/GHRHR/LEP	20
BP	GO:0001894	tissue homeostasis	21/337	275/18903	2.51093e-08	3.34549e-07	1.80187e-07	B2M/INPP5D/AZGP1/SYK/PRKCA/ANGPT1/TLR4/CSF1/LTF/LYZ/CSF1R/ALB/IL7/MC4R/IGKC/TNFAIP3/SFTPD/NOX4/RAC3/IL6/LCN1	21
BP	GO:0001763	morphogenesis of a branching structure	18/337	203/18903	2.61771e-08	3.47662e-07	1.8725e-07	HGF/MET/EGF/AGT/CSF1/TNF/BMP2/FGF1/SEMA3E/CCL11/BMP7/SLIT2/NFATC4/GDF2/FGF8/WNT5A/AREG/PGR	18
BP	GO:0048260	positive regulation of receptor-mediated endocytosis	10/337	53/18903	2.80467e-08	3.71307e-07	1.99985e-07	B2M/EGF/SYK/ANGPT1/CCL19/CCL21/C3/NTF3/PLCG2/IL4	10
BP	GO:0002791	regulation of peptide secretion	17/337	182/18903	2.97499e-08	3.92604e-07	2.11455e-07	PPARD/CD74/TNF/ACVR1C/IL1B/GPER1/NR0B2/CCL5/FGA/SSTR5/SCT/TFR2/GIPR/TRH/IL6/GHRHR/LEP	17
BP	GO:0097305	response to alcohol	20/337	253/18903	3.05814e-08	4.023e-07	2.16677e-07	A2M/CCR5/CCL7/PTGDR/CCL19/TNF/TACR1/CYBB/CD14/NR0B2/CCL21/OPRK1/TNFSF4/ADCYAP1R1/SLIT2/NPPC/CSF3/IL13/LEP/ADIPOQ	20
BP	GO:0015833	peptide transport	20/337	254/18903	3.26637e-08	4.28338e-07	2.30701e-07	PPARD/CD74/TNF/ACVR1C/IL1B/GPER1/NR0B2/CCL5/MC4R/FGA/SSTR5/SCT/TFR2/VGF/GAL/GIPR/TRH/IL6/GHRHR/LEP	20
BP	GO:0061900	glial cell activation	10/337	54/18903	3.38815e-08	4.42911e-07	2.3855e-07	CX3CR1/IL33/PTPRC/TNF/IL1B/MAPT/AZU1/IL4/IL13/IL6	10
BP	GO:0090087	regulation of peptide transport	17/337	184/18903	3.49895e-08	4.5596e-07	2.45579e-07	PPARD/CD74/TNF/ACVR1C/IL1B/GPER1/NR0B2/CCL5/FGA/SSTR5/SCT/TFR2/GIPR/TRH/IL6/GHRHR/LEP	17
BP	GO:0002761	regulation of myeloid leukocyte differentiation	14/337	122/18903	3.77723e-08	4.90686e-07	2.64282e-07	CD74/INPP5D/KITLG/PRKCA/TLR4/CSF1/LTF/TNF/CD4/IL12B/IL4/INHA/IL34/ADIPOQ	14
BP	GO:0002474	antigen processing and presentation of peptide antigen via MHC class I	8/337	30/18903	3.90536e-08	5.0418e-07	2.7155e-07	HLA-E/HLA-B/B2M/HLA-F/HLA-C/HLA-A/HLA-G/AZGP1	8
BP	GO:0002825	regulation of T-helper 1 type immune response	8/337	30/18903	3.90536e-08	5.0418e-07	2.7155e-07	IL33/CCL19/IL1B/IL12B/XCL1/TNFSF4/SLC11A1/IL18R1	8
BP	GO:0046887	positive regulation of hormone secretion	14/337	123/18903	4.19458e-08	5.39841e-07	2.90757e-07	PPARD/TACR1/GPER1/NR0B2/FGA/SCT/BMP6/TFR2/GAL/GIPR/TRH/INHA/GHRHR/LEP	14
BP	GO:0031960	response to corticosteroid	16/337	165/18903	4.50424e-08	5.77905e-07	3.11258e-07	A2M/CALCR/TNF/PTAFR/CYBB/GPER1/PCSK1/FLT3/SSTR5/BMP6/SLIT2/AREG/EPO/IL6/GHRHR/ADIPOQ	16
BP	GO:0050832	defense response to fungus	10/337	56/18903	4.88455e-08	6.24772e-07	3.365e-07	CX3CR1/CTSG/LTF/DEFB119/GNLY/HTN3/RNASE7/PLCG2/MPO/DEFA4	10
BP	GO:0051250	negative regulation of lymphocyte activation	16/337	166/18903	4.90513e-08	6.2548e-07	3.36881e-07	HLA-F/CD74/HLA-G/INPP5D/BTK/SDC4/TNFSF18/CTSG/XCL1/FCGR2B/TNFSF4/TNFAIP3/SFTPD/GAL/IL4/INHA	16
BP	GO:0034764	positive regulation of transmembrane transport	19/337	237/18903	5.445e-08	6.92197e-07	3.72815e-07	CALCR/CCL2/AGT/IGF1/KCNH2/PTAFR/CTSS/GPER1/XCL1/HSPA2/C3/OPRK1/ADCYAP1R1/PLCG2/NR4A3/GAL/FGF21/IL13/ADIPOQ	19
BP	GO:0090132	epithelium migration	24/337	369/18903	5.49488e-08	6.96409e-07	3.75084e-07	PPARD/PIK3CG/MET/EGF/S100A2/KITLG/TEK/PRKCA/ANGPT1/AGT/NRP2/TNF/TACR1/FGF1/TGFB2/LTB4R2/SLIT2/NR2E1/PTN/GDF2/PLCG2/FGF8/WNT5A/IL4	24
BP	GO:0007249	I-kappaB kinase/NF-kappaB signaling	21/337	288/18903	5.56782e-08	7.03508e-07	3.78907e-07	CX3CR1/CD74/TRIM22/BTK/ANGPT1/CCL19/TLR4/TLR7/LTF/TNF/CD4/IL1B/FASLG/CCL21/IL1A/RORA/TNFAIP3/TNFRSF19/PLCG2/WNT5A/ADIPOQ	21
BP	GO:0042698	ovulation cycle	11/337	72/18903	5.63047e-08	7.09269e-07	3.8201e-07	A2M/BMPR1B/OPRK1/GDF10/TGFB2/SLIT2/OPRL1/PTN/PTX3/PGR/LEP	11
BP	GO:0051235	maintenance of location	23/337	342/18903	5.71169e-08	7.17326e-07	3.86349e-07	PPARD/PTPRC/XCR1/CCR5/LCN2/CCL19/TNF/ACVR1C/CD4/ALB/IL1B/GPER1/XCL1/FASLG/LCK/CCL21/C3/PDIA2/LTBP1/PLCG2/IL13/IL6/LEP	23
BP	GO:0002823	negative regulation of adaptive immune response based on somatic recombination of immune receptors built from immunoglobulin superfamily domains	10/337	57/18903	5.83101e-08	7.30105e-07	3.93233e-07	HLA-F/IL33/PTPRC/HLA-G/TNFSF18/CR2/XCL1/FCGR2B/TNFSF4/IL4	10
BP	GO:0045637	regulation of myeloid cell differentiation	18/337	214/18903	5.90541e-08	7.37201e-07	3.97054e-07	B2M/CD74/INPP5D/KITLG/PRKCA/TLR4/CSF1/LTF/TNF/CD4/CSF3R/IL12B/THPO/CSF3/IL4/INHA/IL34/ADIPOQ	18
BP	GO:0090130	tissue migration	24/337	374/18903	7.07494e-08	8.80554e-07	4.74264e-07	PPARD/PIK3CG/MET/EGF/S100A2/KITLG/TEK/PRKCA/ANGPT1/AGT/NRP2/TNF/TACR1/FGF1/TGFB2/LTB4R2/SLIT2/NR2E1/PTN/GDF2/PLCG2/FGF8/WNT5A/IL4	24
BP	GO:0050767	regulation of neurogenesis	24/337	377/18903	8.21531e-08	1.01943e-06	5.49064e-07	B2M/CX3CR1/IL33/TNF/SEMA6A/BMP2/IL1B/SEMA3E/GPER1/CCL11/BMP7/SEMA6B/SLIT2/NR2E1/SLIT1/NFATC4/PTN/MAPT/WNT5A/SEMA6D/BDNF/SEMA3B/IL6/IL34	24
BP	GO:0045621	positive regulation of lymphocyte differentiation	14/337	130/18903	8.49432e-08	1.05092e-06	5.66022e-07	CD74/HLA-DRA/PTPRC/HLA-G/INPP5D/BTK/SYK/CCL19/IL2RG/IL7/IL12B/TNFSF4/IL4/IL1RL2	14
BP	GO:0045444	fat cell differentiation	19/337	244/18903	8.64218e-08	1.06604e-06	5.74166e-07	FABP3/PPARD/SORT1/PSMB8/RORC/TNF/BMP2/GPER1/GDF10/BMP7/IL11/RORA/NR4A2/NR4A3/WNT5A/FABP4/IL6/LEP/ADIPOQ	19
BP	GO:0042886	amide transport	21/337	296/18903	8.88099e-08	1.09226e-06	5.88286e-07	PPARD/CD74/TNF/ACVR1C/IL1B/GPER1/NR0B2/CCL5/MC4R/FGA/SSTR5/SCT/TFR2/VGF/GAL/GIPR/TRH/IL6/PLTP/GHRHR/LEP	21
BP	GO:0062013	positive regulation of small molecule metabolic process	15/337	152/18903	9.44986e-08	1.15879e-06	6.24122e-07	PPARD/CD74/IGF1/TNF/CD244/PTAFR/FGF1/IL1B/GPER1/GUCA2A/BMP6/ADCYAP1R1/NR4A3/IL4/ADIPOQ	15
BP	GO:0051048	negative regulation of secretion	16/337	175/18903	1.02766e-07	1.25646e-06	6.76727e-07	HLA-F/CD74/EGF/NRG1/TNF/ACVR1C/IL1B/IL12B/FCGR2B/OPRK1/SCT/IL11/TRH/INHA/LEP/ADIPOQ	16
BP	GO:0048732	gland development	26/337	441/18903	1.07775e-07	1.31384e-06	7.07632e-07	HGF/TGFA/MET/EGF/PRLR/NRG1/CSF1/TNF/CSF1R/BMP2/FGF1/CCL11/PCSK1/BMP7/TGFB2/TNFAIP3/PTN/FGF8/WNT5A/AREG/PGR/NODAL/IL6/PRL/TNC/GHRHR	26
BP	GO:0061081	positive regulation of myeloid leukocyte cytokine production involved in immune response	8/337	34/18903	1.13846e-07	1.38379e-06	7.45305e-07	CD74/HLA-G/SYK/TLR4/TLR7/PLCG2/NR4A3/WNT5A	8
BP	GO:0001774	microglial cell activation	9/337	47/18903	1.22745e-07	1.48761e-06	8.01221e-07	CX3CR1/IL33/PTPRC/TNF/MAPT/AZU1/IL4/IL13/IL6	9
BP	GO:0001659	temperature homeostasis	16/337	178/18903	1.30118e-07	1.57239e-06	8.46882e-07	SYK/PRLR/LCN2/TLR4/TNF/IL1B/IL1A/TSHR/IL18R1/FGF21/IL4/FABP4/IL13/NOX3/LEP/ADIPOQ	16
BP	GO:0002820	negative regulation of adaptive immune response	10/337	62/18903	1.34164e-07	1.61268e-06	8.68584e-07	HLA-F/IL33/PTPRC/HLA-G/TNFSF18/CR2/XCL1/FCGR2B/TNFSF4/IL4	10
BP	GO:0002468	dendritic cell antigen processing and presentation	6/337	15/18903	1.34228e-07	1.61268e-06	8.68584e-07	CD74/HLA-DRA/CCL19/CCL21/FCGR2B/SLC11A1	6
BP	GO:0001938	positive regulation of endothelial cell proliferation	13/337	115/18903	1.39145e-07	1.66453e-06	8.96509e-07	PROK1/EGF/TEK/PRKCA/NRP2/BMP2/CCR3/CCL11/BMP6/GDF2/PGF/WNT5A/AGTR1	13
BP	GO:0021700	developmental maturation	21/337	304/18903	1.39345e-07	1.66453e-06	8.96509e-07	CX3CR1/SEMG1/BTK/CCL19/IGF1/LTF/BMP2/DEFB1/CCL21/C3/TGFB2/NFATC4/NPPC/NR4A2/WNT5A/GAL/RAC3/PGR/EPO/GHRHR/LEP	21
BP	GO:0090276	regulation of peptide hormone secretion	16/337	179/18903	1.40611e-07	1.67484e-06	9.02062e-07	PPARD/TNF/ACVR1C/IL1B/GPER1/NR0B2/CCL5/FGA/SSTR5/SCT/TFR2/GIPR/TRH/IL6/GHRHR/LEP	16
BP	GO:0038095	Fc-epsilon receptor signaling pathway	7/337	24/18903	1.4343e-07	1.70354e-06	9.17521e-07	BTK/SYK/VAV3/VAV2/PLCG2/NR4A3/PRKCQ	7
BP	GO:2000352	negative regulation of endothelial cell apoptotic process	8/337	35/18903	1.45303e-07	1.72086e-06	9.26852e-07	TEK/ANGPT1/FGA/TNFAIP3/ANGPTL4/FGF21/IL4/IL13	8
BP	GO:0048608	reproductive structure development	21/337	306/18903	1.5557e-07	1.83723e-06	9.89527e-07	A2M/KITLG/PRLR/BMPR1B/AMHR2/C3/IL1A/BMP7/BMP6/TGFB2/SLIT2/VGF/FGF9/PTX3/FGF8/WNT5A/PGR/INHA/TNC/LEP/UMODL1	21
BP	GO:0032623	interleukin-2 production	10/337	63/18903	1.5698e-07	1.84341e-06	9.92856e-07	PTPRC/CD4/IL1B/XCL1/CD3E/IL1A/TNFAIP3/PLCG2/SFTPD/PRKCQ	10
BP	GO:0032663	regulation of interleukin-2 production	10/337	63/18903	1.5698e-07	1.84341e-06	9.92856e-07	PTPRC/CD4/IL1B/XCL1/CD3E/IL1A/TNFAIP3/PLCG2/SFTPD/PRKCQ	10
BP	GO:0006875	cellular metal ion homeostasis	25/337	420/18903	1.59191e-07	1.8641e-06	1.004e-06	PTPRC/XCR1/CCR5/CCL7/SLC40A1/LCN2/CCL19/AGT/GPER1/CCL11/XCL1/FASLG/LCK/CCL21/CCL5/IL1A/BMP6/TFR2/GDF2/PLCG2/WNT5A/SLC22A17/SLC11A1/TMPRSS6/IL13	25
BP	GO:0060562	epithelial tube morphogenesis	22/337	335/18903	1.68866e-07	1.97184e-06	1.06203e-06	MET/EGF/SDC4/AGT/CSF1/TNF/CSF1R/BMP2/FGF1/SEMA3E/CCL11/BMP7/TGFB2/SLIT2/NFATC4/GDF2/FGF8/WNT5A/AREG/PGR/LGR5/NODAL	22
BP	GO:0002712	regulation of B cell mediated immunity	10/337	64/18903	1.83138e-07	2.12655e-06	1.14535e-06	HLA-E/PTPRC/BTK/CR2/TNF/XCL1/FCGR2B/C3/TNFSF4/IL4	10
BP	GO:0002889	regulation of immunoglobulin mediated immune response	10/337	64/18903	1.83138e-07	2.12655e-06	1.14535e-06	HLA-E/PTPRC/BTK/CR2/TNF/XCL1/FCGR2B/C3/TNFSF4/IL4	10
BP	GO:1990845	adaptive thermogenesis	15/337	160/18903	1.86114e-07	2.15509e-06	1.16073e-06	SYK/PRLR/LCN2/TLR4/SCTR/MC4R/SCT/TSHR/IL18R1/FGF21/IL4/FABP4/IL13/LEP/ADIPOQ	15
BP	GO:0061458	reproductive system development	21/337	310/18903	1.93354e-07	2.2327e-06	1.20253e-06	A2M/KITLG/PRLR/BMPR1B/AMHR2/C3/IL1A/BMP7/BMP6/TGFB2/SLIT2/VGF/FGF9/PTX3/FGF8/WNT5A/PGR/INHA/TNC/LEP/UMODL1	21
BP	GO:0010631	epithelial cell migration	23/337	366/18903	1.9406e-07	2.23465e-06	1.20358e-06	PPARD/PIK3CG/MET/EGF/S100A2/KITLG/TEK/PRKCA/ANGPT1/AGT/NRP2/TNF/TACR1/FGF1/TGFB2/LTB4R2/SLIT2/NR2E1/PTN/GDF2/PLCG2/WNT5A/IL4	23
BP	GO:0050852	T cell receptor signaling pathway	14/337	139/18903	1.97061e-07	2.26293e-06	1.21881e-06	HLA-A/HLA-DPB1/PTPRC/INPP5D/HLA-DQB1/ITK/SH2D1A/LCP2/CD247/CD3E/LCK/TRAC/CD3G/PLCG2	14
BP	GO:0051960	regulation of nervous system development	26/337	456/18903	2.07015e-07	2.37069e-06	1.27685e-06	B2M/HGF/CX3CR1/IL33/TNF/SEMA6A/BMP2/IL1B/SEMA3E/GPER1/CCL11/BMP7/SEMA6B/SLIT2/NR2E1/SLIT1/NFATC4/PTN/MAPT/DKK1/WNT5A/SEMA6D/BDNF/SEMA3B/IL6/IL34	26
BP	GO:0002269	leukocyte activation involved in inflammatory response	9/337	50/18903	2.15319e-07	2.45227e-06	1.32079e-06	CX3CR1/IL33/PTPRC/TNF/MAPT/AZU1/IL4/IL13/IL6	9
BP	GO:0061082	myeloid leukocyte cytokine production	9/337	50/18903	2.15319e-07	2.45227e-06	1.32079e-06	CD74/HLA-G/SYK/TLR4/TLR7/TGFB2/PLCG2/NR4A3/WNT5A	9
BP	GO:0060395	SMAD protein signal transduction	11/337	82/18903	2.22589e-07	2.52814e-06	1.36165e-06	BMP2/GDF10/BMP7/BMP6/TGFB2/LEFTY1/GDF2/VIM/INHBE/NODAL/INHA	11
BP	GO:0044703	multi-organism reproductive process	17/337	209/18903	2.24059e-07	2.53791e-06	1.36691e-06	PPARD/SEMG1/ENDOU/PRLR/AGT/PTAFR/ACVR1C/TACR1/IL1B/PTN/AGRP/PGF/PGR/EPO/NODAL/PRL/LEP	17
BP	GO:0001503	ossification	25/337	429/18903	2.37565e-07	2.68358e-06	1.44537e-06	HGF/SORT1/IGF1/CSF1/LTF/TNF/TACR1/BMP2/BMPR1B/GDF10/BMP7/BMP6/TGFB2/BMP1/FGF9/RORB/PTN/GDF2/NPPC/DKK1/WNT5A/AREG/IL6/TNC/LEP	25
BP	GO:0045619	regulation of lymphocyte differentiation	17/337	210/18903	2.39901e-07	2.70262e-06	1.45562e-06	CD74/HLA-DOA/HLA-DRA/PTPRC/HLA-G/INPP5D/BTK/SYK/CCL19/TNFSF18/IL2RG/IL7/IL12B/TNFSF4/IL4/INHA/IL1RL2	17
BP	GO:0051384	response to glucocorticoid	14/337	142/18903	2.57026e-07	2.88406e-06	1.55334e-06	A2M/CALCR/TNF/PTAFR/PCSK1/FLT3/SSTR5/BMP6/SLIT2/AREG/EPO/IL6/GHRHR/ADIPOQ	14
BP	GO:0045058	T cell selection	9/337	51/18903	2.57394e-07	2.88406e-06	1.55334e-06	CD74/PTPRC/SYK/TNFSF18/CD4/IL12B/CD3E/CD3G/IL6	9
BP	GO:0002438	acute inflammatory response to antigenic stimulus	7/337	26/18903	2.64363e-07	2.95418e-06	1.59111e-06	HLA-E/A2M/BTK/NPY/FCGR2B/C3/IL31RA	7
BP	GO:0043270	positive regulation of ion transport	20/337	289/18903	2.7001e-07	3.0092e-06	1.62075e-06	CALCR/CCL2/AGT/KCNH2/PTAFR/CTSS/IL1B/GPER1/XCL1/HSPA2/CCL5/IL1A/OPRK1/ADCYAP1R1/PLCG2/FGF12/GAL/TRH/IL13/LEP	20
BP	GO:0002704	negative regulation of leukocyte mediated immunity	10/337	68/18903	3.30035e-07	3.65855e-06	1.97048e-06	HLA-E/HLA-B/HLA-F/HLA-A/CX3CR1/PTPRC/HLA-G/CR2/XCL1/FCGR2B	10
BP	GO:0042093	T-helper cell differentiation	10/337	68/18903	3.30035e-07	3.65855e-06	1.97048e-06	HLA-DRA/RORC/CCL19/TNFSF18/IL12B/TNFSF4/RORA/IL18R1/IL4/IL6	10
BP	GO:0030099	myeloid cell differentiation	24/337	407/18903	3.36313e-07	3.71822e-06	2.00262e-06	B2M/CD74/INPP5D/KITLG/PRKCA/CCL19/TLR4/CSF1/LTF/TNF/CSF1R/CD4/CSF3R/IL12B/THPO/IL11/CSF3/PRTN3/IL4/EPO/INHA/IL34/IL31RA/ADIPOQ	24
BP	GO:0046425	regulation of receptor signaling pathway via JAK-STAT	12/337	104/18903	3.37547e-07	3.72139e-06	2.00433e-06	PTPRC/EGF/PRLR/AGT/IL10RA/TNF/IL12B/CCL5/IL4/IL6/PRL/LEP	12
BP	GO:0046660	female sex differentiation	13/337	124/18903	3.3839e-07	3.72139e-06	2.00433e-06	A2M/KITLG/BMPR1B/AMHR2/ADCYAP1R1/SLIT2/VGF/PTX3/WNT5A/PGR/INHA/LEP/UMODL1	13
BP	GO:0032753	positive regulation of interleukin-4 production	7/337	27/18903	3.51458e-07	3.84476e-06	2.07078e-06	HLA-E/IL33/CD40LG/SYK/CD3E/TNFSF4/PRKCQ	7
BP	GO:0048843	negative regulation of axon extension involved in axon guidance	7/337	27/18903	3.51458e-07	3.84476e-06	2.07078e-06	SEMA6A/SEMA3E/SEMA6B/SLIT1/WNT5A/SEMA6D/SEMA3B	7
BP	GO:0002639	positive regulation of immunoglobulin production	9/337	53/18903	3.6337e-07	3.96464e-06	2.13534e-06	HLA-E/IL33/PTPRC/BTK/XCL1/TNFSF4/IL4/IL13/IL6	9
BP	GO:0009615	response to virus	24/337	409/18903	3.67543e-07	3.99968e-06	2.15421e-06	IL33/DUOX2/PTPRC/TRIM22/CCL19/TLR7/TNF/MICB/IL1B/DMBT1/CCL11/IL12B/XCL1/CCL5/OPRK1/TNFSF4/TNFAIP3/MMP12/CCL22/AZU1/IL4/RNASE2/IL6/MBL2	24
BP	GO:0006816	calcium ion transport	25/337	440/18903	3.81437e-07	4.14003e-06	2.22981e-06	CYSLTR1/PIK3CG/SEMG1/PTPRC/XCR1/CALCR/EGF/IL16/CCL2/CCR5/CCL19/AGT/CD4/GPER1/XCL1/FASLG/LCK/CCL21/HSPA2/CCL5/ADCYAP1R1/OPRL1/PLCG2/EPO/IL13	25
BP	GO:0044706	multi-multicellular organism process	17/337	218/18903	4.08332e-07	4.42041e-06	2.38082e-06	PPARD/SEMG1/ENDOU/PRLR/AGT/PTAFR/ACVR1C/TACR1/IL1B/PTN/AGRP/PGF/PGR/EPO/NODAL/PRL/LEP	17
BP	GO:0035747	natural killer cell chemotaxis	5/337	10/18903	4.09431e-07	4.42079e-06	2.38102e-06	PIK3CG/CCL2/CCL7/XCL1/CCL5	5
BP	GO:0014910	regulation of smooth muscle cell migration	11/337	87/18903	4.11244e-07	4.42886e-06	2.38537e-06	PPARD/AGT/TLR4/IGF1/TACR1/CCL5/SLIT2/FGF9/NR4A3/SEMA6D/ADIPOQ	11
BP	GO:0045778	positive regulation of ossification	9/337	54/18903	4.29268e-07	4.61102e-06	2.48348e-06	LTF/TACR1/BMP2/BMPR1B/BMP7/BMP6/TGFB2/PTN/WNT5A	9
BP	GO:0002294	CD4-positive, alpha-beta T cell differentiation involved in immune response	10/337	70/18903	4.3632e-07	4.6747e-06	2.51778e-06	HLA-DRA/RORC/CCL19/TNFSF18/IL12B/TNFSF4/RORA/IL18R1/IL4/IL6	10
BP	GO:0048246	macrophage chemotaxis	8/337	40/18903	4.3932e-07	4.69474e-06	2.52857e-06	CCL2/TNFSF18/CSF1/CSF1R/CCL5/SFTPD/AZU1/IL34	8
BP	GO:0002675	positive regulation of acute inflammatory response	7/337	28/18903	4.61479e-07	4.91824e-06	2.64895e-06	HLA-E/PIK3CG/BTK/TNF/IL1B/C3/IL6	7
BP	GO:0043367	CD4-positive, alpha-beta T cell differentiation	11/337	88/18903	4.62601e-07	4.91824e-06	2.64895e-06	HLA-DRA/RORC/CCL19/TNFSF18/IL2RG/IL12B/TNFSF4/RORA/IL18R1/IL4/IL6	11
BP	GO:0002830	positive regulation of type 2 immune response	6/337	18/18903	4.75835e-07	5.04604e-06	2.71778e-06	CD74/IL33/XCL1/TNFSF4/IL4/IL6	6
BP	GO:0045471	response to ethanol	13/337	128/18903	4.89849e-07	5.18143e-06	2.7907e-06	CCL7/TNF/TACR1/CYBB/CD14/NR0B2/OPRK1/ADCYAP1R1/NPPC/CSF3/IL13/LEP/ADIPOQ	13
BP	GO:0002287	alpha-beta T cell activation involved in immune response	10/337	71/18903	4.99903e-07	5.261e-06	2.83356e-06	HLA-DRA/RORC/CCL19/TNFSF18/IL12B/TNFSF4/RORA/IL18R1/IL4/IL6	10
BP	GO:0002293	alpha-beta T cell differentiation involved in immune response	10/337	71/18903	4.99903e-07	5.261e-06	2.83356e-06	HLA-DRA/RORC/CCL19/TNFSF18/IL12B/TNFSF4/RORA/IL18R1/IL4/IL6	10
BP	GO:0046849	bone remodeling	11/337	89/18903	5.19538e-07	5.45383e-06	2.93742e-06	INPP5D/SYK/PRKCA/CSF1R/IL7/MC4R/TNFAIP3/PTN/NOX4/IL6/LEP	11
BP	GO:0050714	positive regulation of protein secretion	13/337	129/18903	5.36114e-07	5.61317e-06	3.02323e-06	PPARD/TLR4/IGF1/GPER1/NR0B2/PCSK1/FGA/IL1A/BMP6/TGFB2/GIPR/TRH/IL13	13
BP	GO:0150077	regulation of neuroinflammatory response	8/337	41/18903	5.37416e-07	5.61317e-06	3.02323e-06	IL33/PTPRC/IGF1/TNF/IL1B/PLCG2/IL4/IL6	8
BP	GO:0048511	rhythmic process	20/337	302/18903	5.4365e-07	5.66404e-06	3.05064e-06	A2M/RORC/TNF/BMPR1B/NR0B2/OPRK1/GDF10/TGFB2/SLIT2/RORA/OPRL1/RORB/PTN/PTX3/AGRP/PRKCG/PGR/GHRHR/LEP/ADIPOQ	20
BP	GO:0046545	development of primary female sexual characteristics	12/337	109/18903	5.65087e-07	5.87266e-06	3.163e-06	A2M/KITLG/BMPR1B/AMHR2/ADCYAP1R1/SLIT2/VGF/PTX3/PGR/INHA/LEP/UMODL1	12
BP	GO:0040013	negative regulation of locomotion	24/337	419/18903	5.67835e-07	5.88651e-06	3.17046e-06	PPARD/CX3CR1/CD74/IL33/SEMG1/CCL2/NRG1/TNF/ACVR1C/SEMA6A/SEMA3E/SLURP1/CCL21/APOD/SEMA6B/SLIT2/SLIT1/GDF2/WNT5A/SEMA6D/IL4/NODAL/SEMA3B/ADIPOQ	24
BP	GO:0032612	interleukin-1 production	13/337	130/18903	5.86244e-07	6.03222e-06	3.24894e-06	CX3CR1/IL16/CCL19/TLR4/IGF1/TNF/IGHD/ORM1/TNFAIP3/WNT5A/AZU1/IL1R2/IL6	13
BP	GO:0032652	regulation of interleukin-1 production	13/337	130/18903	5.86244e-07	6.03222e-06	3.24894e-06	CX3CR1/IL16/CCL19/TLR4/IGF1/TNF/IGHD/ORM1/TNFAIP3/WNT5A/AZU1/IL1R2/IL6	13
BP	GO:0032874	positive regulation of stress-activated MAPK cascade	13/337	130/18903	5.86244e-07	6.03222e-06	3.24894e-06	CCL19/TLR4/TNF/BMP2/IL1B/CCL21/FCGR2B/IL1A/OPRK1/TGFB2/TNFRSF19/WNT5A/LEP	13
BP	GO:0002707	negative regulation of lymphocyte mediated immunity	9/337	56/18903	5.92682e-07	6.0834e-06	3.2765e-06	HLA-E/HLA-B/HLA-F/HLA-A/PTPRC/HLA-G/CR2/XCL1/FCGR2B	9
BP	GO:0060249	anatomical structure homeostasis	21/337	333/18903	6.29607e-07	6.44649e-06	3.47206e-06	B2M/INPP5D/AZGP1/SYK/PRKCA/ANGPT1/TLR4/CSF1/LTF/LYZ/CSF1R/ALB/IL7/MC4R/IGKC/TNFAIP3/SFTPD/NOX4/RAC3/IL6/LCN1	21
BP	GO:0071677	positive regulation of mononuclear cell migration	10/337	73/18903	6.518e-07	6.64354e-06	3.57819e-06	CX3CR1/CCL7/TNFSF18/CSF1/TNF/XCL1/CCL21/CCL5/WNT5A/IL4	10
BP	GO:0002714	positive regulation of B cell mediated immunity	8/337	42/18903	6.53646e-07	6.64354e-06	3.57819e-06	HLA-E/PTPRC/BTK/TNF/XCL1/C3/TNFSF4/IL4	8
BP	GO:0002891	positive regulation of immunoglobulin mediated immune response	8/337	42/18903	6.53646e-07	6.64354e-06	3.57819e-06	HLA-E/PTPRC/BTK/TNF/XCL1/C3/TNFSF4/IL4	8
BP	GO:0048245	eosinophil chemotaxis	6/337	19/18903	6.85045e-07	6.94569e-06	3.74093e-06	CCL2/CCL7/CCL11/CCL21/CCL5/IL4	6
BP	GO:0051092	positive regulation of NF-kappaB transcription factor activity	14/337	154/18903	6.96415e-07	7.04379e-06	3.79376e-06	CX3CR1/TRIM22/CD40LG/BTK/AGT/TNFSF18/TLR4/LTF/TNF/IL1B/PLCG2/WNT5A/IL18R1/PRKCQ	14
BP	GO:0070304	positive regulation of stress-activated protein kinase signaling cascade	13/337	132/18903	6.99236e-07	7.05516e-06	3.79989e-06	CCL19/TLR4/TNF/BMP2/IL1B/CCL21/FCGR2B/IL1A/OPRK1/TGFB2/TNFRSF19/WNT5A/LEP	13
BP	GO:0002604	regulation of dendritic cell antigen processing and presentation	5/337	11/18903	7.39655e-07	7.43108e-06	4.00236e-06	CD74/CCL19/CCL21/FCGR2B/SLC11A1	5
BP	GO:0007162	negative regulation of cell adhesion	20/337	308/18903	7.40818e-07	7.43108e-06	4.00236e-06	CD74/PTPRC/HLA-G/SDC4/ANGPT1/TNFSF18/CTSG/SEMA6A/BMP2/SEMA3E/XCL1/CCL21/FCGR2B/TNFSF4/BMP6/APOD/MMP12/SFTPD/IL4/ADIPOQ	20
BP	GO:0045123	cellular extravasation	10/337	74/18903	7.41857e-07	7.43108e-06	4.00236e-06	CX3CR1/PIK3CG/ITGAL/CCL2/TNF/PTAFR/CCL21/PRTN3/AZU1/LEP	10
BP	GO:0032368	regulation of lipid transport	14/337	155/18903	7.53403e-07	7.52859e-06	4.05488e-06	FABP3/CETP/EGF/SYK/AGT/IL1B/FASLG/IL1A/BMP6/GAL/AGTR1/PLTP/LEP/ADIPOQ	14
BP	GO:0048259	regulation of receptor-mediated endocytosis	12/337	112/18903	7.59365e-07	7.56998e-06	4.07717e-06	B2M/EGF/SYK/ANGPT1/CCL19/CCL21/C3/NTF3/PLCG2/DKK1/IL4/ADIPOQ	12
BP	GO:0030168	platelet activation	13/337	133/18903	7.6271e-07	7.58513e-06	4.08533e-06	PIK3CG/CD40LG/SYK/VAV3/PRKCA/CTSG/TLR4/LCK/FGA/VAV2/PLCG2/PRKCQ/IL6	13
BP	GO:0048771	tissue remodeling	15/337	179/18903	7.95128e-07	7.86987e-06	4.23869e-06	INPP5D/SYK/PRKCA/AGT/CSF1R/IL7/IL12B/MC4R/IL1A/TNFAIP3/PTN/FGF8/NOX4/IL6/LEP	15
BP	GO:0060759	regulation of response to cytokine stimulus	15/337	179/18903	7.95128e-07	7.86987e-06	4.23869e-06	CD74/PTPRC/SYK/ANGPT1/TLR4/CSF1/IL7/CCL5/SLIT2/TNFAIP3/MMP12/WNT5A/IL1R2/IL6/ADIPOQ	15
BP	GO:0043122	regulation of I-kappaB kinase/NF-kappaB signaling	18/337	255/18903	8.07473e-07	7.97308e-06	4.29428e-06	CD74/TRIM22/ANGPT1/CCL19/TLR4/LTF/TNF/CD4/IL1B/FASLG/CCL21/IL1A/RORA/TNFAIP3/TNFRSF19/PLCG2/WNT5A/ADIPOQ	18
BP	GO:0050886	endocrine process	11/337	93/18903	8.13997e-07	8.01845e-06	4.31871e-06	AGT/CTSG/TACR1/CMA1/IL1B/OPRK1/BMP6/GAL/AGTR1/INHA/LEP	11
BP	GO:0045669	positive regulation of osteoblast differentiation	10/337	75/18903	8.42603e-07	8.28061e-06	4.45991e-06	HGF/IGF1/LTF/BMP2/BMPR1B/GDF10/BMP7/BMP6/NPPC/IL6	10
BP	GO:1903707	negative regulation of hemopoiesis	12/337	114/18903	9.19794e-07	9.01788e-06	4.857e-06	CD74/HLA-G/INPP5D/TNFSF18/TLR4/LTF/FCGR2B/TNFSF4/IL17D/IL4/INHA/ADIPOQ	12
BP	GO:0061098	positive regulation of protein tyrosine kinase activity	9/337	59/18903	9.37937e-07	9.17413e-06	4.94116e-06	TGFA/EGF/NRG1/AGT/CSF1R/CCL5/NOX4/AREG/IL34	9
BP	GO:0002577	regulation of antigen processing and presentation	6/337	20/18903	9.63996e-07	9.36292e-06	5.04284e-06	CD74/HLA-DOA/CCL19/CCL21/FCGR2B/SLC11A1	6
BP	GO:0007171	activation of transmembrane receptor protein tyrosine kinase activity	6/337	20/18903	9.63996e-07	9.36292e-06	5.04284e-06	TGFA/EGF/PRLR/ANGPT1/NRG1/AREG	6
BP	GO:0045342	MHC class II biosynthetic process	6/337	20/18903	9.63996e-07	9.36292e-06	5.04284e-06	IL33/CIITA/TLR4/SLC11A1/AZU1/IL4	6
BP	GO:0002220	innate immune response activating cell surface receptor signaling pathway	7/337	31/18903	9.78813e-07	9.46262e-06	5.09654e-06	SYK/COLEC10/KLRC3/KLRC4/FCN2/PLCG2/MBL2	7
BP	GO:0002507	tolerance induction	7/337	31/18903	9.78813e-07	9.46262e-06	5.09654e-06	HLA-E/HLA-B/HLA-G/CCR4/PDCD1/CD3E/TNFAIP3	7
BP	GO:0014909	smooth muscle cell migration	11/337	95/18903	1.01008e-06	9.72606e-06	5.23843e-06	PPARD/AGT/TLR4/IGF1/TACR1/CCL5/SLIT2/FGF9/NR4A3/SEMA6D/ADIPOQ	11
BP	GO:1904892	regulation of receptor signaling pathway via STAT	12/337	115/18903	1.01074e-06	9.72606e-06	5.23843e-06	PTPRC/EGF/PRLR/AGT/IL10RA/TNF/IL12B/CCL5/IL4/IL6/PRL/LEP	12
BP	GO:0030073	insulin secretion	15/337	183/18903	1.05299e-06	1.01091e-05	5.44475e-06	PPARD/TNF/ACVR1C/IL1B/GPER1/NR0B2/CCL5/MC4R/SSTR5/VGF/GAL/GIPR/TRH/IL6/LEP	15
BP	GO:0002886	regulation of myeloid leukocyte mediated immunity	9/337	60/18903	1.08632e-06	1.03812e-05	5.5913e-06	HLA-E/CX3CR1/BTK/SYK/PTAFR/FCGR2B/C3/IL4/IL13	9
BP	GO:1905517	macrophage migration	9/337	60/18903	1.08632e-06	1.03812e-05	5.5913e-06	CX3CR1/CCL2/TNFSF18/CSF1/CSF1R/CCL5/SFTPD/AZU1/IL34	9
BP	GO:0009743	response to carbohydrate	17/337	234/18903	1.10043e-06	1.0492e-05	5.65095e-06	PPARD/TNF/ACVR1C/COLEC12/CMA1/IL1B/GPER1/NR0B2/PCSK1/IL1A/OPRK1/NOX4/GIPR/FGF21/GHRHR/LEP/ADIPOQ	17
BP	GO:0002065	columnar/cuboidal epithelial cell differentiation	12/337	116/18903	1.10957e-06	1.0534e-05	5.67356e-06	RARB/NPY/BMP2/BMP7/BMP6/PYY/FGF8/WNT5A/PGR/NODAL/IL13/IL31RA	12
BP	GO:0007548	sex differentiation	19/337	288/18903	1.10991e-06	1.0534e-05	5.67356e-06	A2M/KITLG/BMPR1B/AMHR2/IL1A/CNTFR/BMP6/TGFB2/ADCYAP1R1/SLIT2/VGF/FGF9/PTX3/FGF8/WNT5A/PGR/INHA/LEP/UMODL1	19
BP	GO:0002275	myeloid cell activation involved in immune response	11/337	96/18903	1.12286e-06	1.06085e-05	5.7137e-06	CX3CR1/IL33/PIK3CG/BTK/SYK/PTGDR/PTAFR/PLCG2/NR4A3/IL4/IL13	11
BP	GO:0061097	regulation of protein tyrosine kinase activity	11/337	96/18903	1.12286e-06	1.06085e-05	5.7137e-06	PTPRC/TGFA/EGF/NRG1/AGT/CSF1R/CCL5/NOX4/AREG/IL34/CBLC	11
BP	GO:0050728	negative regulation of inflammatory response	15/337	184/18903	1.1282e-06	1.06348e-05	5.72785e-06	PPARD/HGF/PTPRC/SYK/TEK/NPY/IGF1/GPER1/IL12B/FCGR2B/RORA/TNFAIP3/IL4/IL13/ADIPOQ	15
BP	GO:2000516	positive regulation of CD4-positive, alpha-beta T cell activation	8/337	45/18903	1.13945e-06	1.07165e-05	5.77187e-06	HLA-DRA/CCL19/IL2RG/IL12B/XCL1/CD3E/TNFSF4/PRKCQ	8
BP	GO:0045582	positive regulation of T cell differentiation	12/337	117/18903	1.21687e-06	1.13931e-05	6.13626e-06	CD74/HLA-DRA/PTPRC/HLA-G/SYK/CCL19/IL2RG/IL7/IL12B/TNFSF4/IL4/IL1RL2	12
BP	GO:0071887	leukocyte apoptotic process	12/337	117/18903	1.21687e-06	1.13931e-05	6.13626e-06	CD74/BTK/KITLG/CCL19/PDCD1/FASLG/CCL21/CCL5/CD3G/WNT5A/PRKCQ/IL6	12
BP	GO:0002758	innate immune response-activating signal transduction	7/337	32/18903	1.23383e-06	1.15259e-05	6.20783e-06	SYK/COLEC10/KLRC3/KLRC4/FCN2/PLCG2/MBL2	7
BP	GO:0007411	axon guidance	17/337	236/18903	1.23785e-06	1.15375e-05	6.21406e-06	NRP2/CSF1R/LGR6/SEMA6A/SEMA3E/BMPR1B/BMP7/SEMA6B/SLIT2/SLIT1/WNT5A/SEMA6D/ARTN/TUBB3/BDNF/PRKCQ/SEMA3B	17
BP	GO:0097485	neuron projection guidance	17/337	237/18903	1.31221e-06	1.22033e-05	6.57265e-06	NRP2/CSF1R/LGR6/SEMA6A/SEMA3E/BMPR1B/BMP7/SEMA6B/SLIT2/SLIT1/WNT5A/SEMA6D/ARTN/TUBB3/BDNF/PRKCQ/SEMA3B	17
BP	GO:0010632	regulation of epithelial cell migration	19/337	292/18903	1.36391e-06	1.26557e-05	6.81633e-06	PIK3CG/MET/EGF/TEK/PRKCA/ANGPT1/AGT/NRP2/TNF/TACR1/FGF1/TGFB2/SLIT2/NR2E1/PTN/GDF2/PLCG2/WNT5A/IL4	19
BP	GO:0002292	T cell differentiation involved in immune response	10/337	79/18903	1.37499e-06	1.26737e-05	6.826e-06	HLA-DRA/RORC/CCL19/TNFSF18/IL12B/TNFSF4/RORA/IL18R1/IL4/IL6	10
BP	GO:0043299	leukocyte degranulation	10/337	79/18903	1.37499e-06	1.26737e-05	6.826e-06	HLA-F/PIK3CG/BTK/SYK/PTGDR/PTAFR/FCGR2B/NR4A3/IL4/IL13	10
BP	GO:2000514	regulation of CD4-positive, alpha-beta T cell activation	10/337	79/18903	1.37499e-06	1.26737e-05	6.826e-06	HLA-DRA/CCL19/TNFSF18/IL2RG/IL12B/XCL1/CD3E/TNFSF4/IL4/PRKCQ	10
BP	GO:0045137	development of primary sexual characteristics	17/337	238/18903	1.3906e-06	1.27892e-05	6.88821e-06	A2M/KITLG/BMPR1B/AMHR2/IL1A/TGFB2/ADCYAP1R1/SLIT2/VGF/FGF9/PTX3/FGF8/WNT5A/PGR/INHA/LEP/UMODL1	17
BP	GO:0030522	intracellular receptor signaling pathway	18/337	266/18903	1.48457e-06	1.3578e-05	7.31307e-06	PPARD/RARB/RORC/TLR4/BMP2/THRB/GPER1/RORA/NR2E1/TNFAIP3/RORB/NR4A2/NR4A3/HNF4G/PGR/NODAL/GHRHR/LEP	18
BP	GO:0051091	positive regulation of DNA-binding transcription factor activity	18/337	266/18903	1.48457e-06	1.3578e-05	7.31307e-06	CX3CR1/TRIM22/CD40LG/BTK/AGT/TNFSF18/TLR4/LTF/TNF/BMP2/IL1B/PLCG2/CSF3/WNT5A/IL18R1/NODAL/PRKCQ/IL6	18
BP	GO:0045667	regulation of osteoblast differentiation	13/337	141/18903	1.48617e-06	1.3578e-05	7.31307e-06	HGF/IGF1/LTF/TNF/BMP2/BMPR1B/GDF10/BMP7/BMP6/RORB/NPPC/AREG/IL6	13
BP	GO:0031667	response to nutrient levels	25/337	474/18903	1.48983e-06	1.35816e-05	7.315e-06	SSTR1/PPARD/A2M/NPY/TNF/ACVR1C/CYBB/ALB/SCTR/PCSK1/MC4R/IL1A/SCT/BMP7/VGF/PRKCG/GIPR/UCN2/FGF21/EPO/MPO/PRL/LEP/ADIPOQ/GCGR	25
BP	GO:0038094	Fc-gamma receptor signaling pathway	7/337	33/18903	1.54221e-06	1.39978e-05	7.53915e-06	PTPRC/SYK/VAV3/CD247/LCK/FCGR2B/VAV2	7
BP	GO:0048841	regulation of axon extension involved in axon guidance	7/337	33/18903	1.54221e-06	1.39978e-05	7.53915e-06	SEMA6A/SEMA3E/SEMA6B/SLIT1/WNT5A/SEMA6D/SEMA3B	7
BP	GO:0002861	regulation of inflammatory response to antigenic stimulus	8/337	47/18903	1.61152e-06	1.45632e-05	7.8437e-06	HLA-E/BTK/SYK/NPY/TNF/IL12B/FCGR2B/C3	8
BP	GO:0031294	lymphocyte costimulation	8/337	47/18903	1.61152e-06	1.45632e-05	7.8437e-06	CD40LG/CCL19/CD3E/LCK/CCL21/TNFSF4/TNFSF13B/IL4	8
BP	GO:0045453	bone resorption	9/337	63/18903	1.65945e-06	1.49638e-05	8.05946e-06	INPP5D/SYK/PRKCA/CSF1R/IL7/MC4R/TNFAIP3/NOX4/IL6	9
BP	GO:0061844	antimicrobial humoral immune response mediated by antimicrobial peptide	10/337	81/18903	1.73714e-06	1.56305e-05	8.41854e-06	SEMG1/REG3G/LTF/DEFB1/GNLY/CXCL3/CXCL5/RNASE7/DEFA4/CXCL1	10
BP	GO:0033630	positive regulation of cell adhesion mediated by integrin	6/337	22/18903	1.80061e-06	1.60971e-05	8.66983e-06	SYK/CD3E/CCL21/CCL5/TGFB2/RAC3	6
BP	GO:0072574	hepatocyte proliferation	6/337	22/18903	1.80061e-06	1.60971e-05	8.66983e-06	TGFA/TNF/FGF1/TNFAIP3/PTN/IL6	6
BP	GO:0072575	epithelial cell proliferation involved in liver morphogenesis	6/337	22/18903	1.80061e-06	1.60971e-05	8.66983e-06	TGFA/TNF/FGF1/TNFAIP3/PTN/IL6	6
BP	GO:0001959	regulation of cytokine-mediated signaling pathway	14/337	167/18903	1.84677e-06	1.64743e-05	8.87302e-06	CD74/PTPRC/SYK/ANGPT1/CSF1/IL7/CCL5/SLIT2/TNFAIP3/MMP12/WNT5A/IL1R2/IL6/ADIPOQ	14
BP	GO:0030278	regulation of ossification	12/337	122/18903	1.90339e-06	1.69129e-05	9.10925e-06	CSF1/LTF/TACR1/BMP2/BMPR1B/GDF10/BMP7/BMP6/TGFB2/PTN/DKK1/WNT5A	12
BP	GO:0046850	regulation of bone remodeling	8/337	48/18903	1.90408e-06	1.69129e-05	9.10925e-06	INPP5D/SYK/PRKCA/CSF1R/MC4R/TNFAIP3/IL6/LEP	8
BP	GO:0032743	positive regulation of interleukin-2 production	7/337	34/18903	1.91253e-06	1.69518e-05	9.13017e-06	PTPRC/CD4/IL1B/CD3E/IL1A/PLCG2/PRKCQ	7
BP	GO:0010876	lipid localization	25/337	483/18903	2.08702e-06	1.84591e-05	9.942e-06	FABP3/PPARD/FABP2/CETP/EGF/SYK/AGT/TNF/ACVR1C/RBP5/IL1B/NR0B2/FASLG/C3/IL1A/FABP6/BMP6/APOD/GAL/FABP4/AGTR1/IL6/PLTP/LEP/ADIPOQ	25
BP	GO:0050878	regulation of body fluid levels	22/337	390/18903	2.17918e-06	1.92332e-05	1.0359e-05	PIK3CG/CD40LG/MET/SYK/PRLR/VAV3/PRKCA/CTSG/TLR4/TACR1/LCK/FGA/OPRK1/SCT/VAV2/OPRL1/PLCG2/SERPIND1/PRKCQ/IL6/PRL/GHRHR	22
BP	GO:0045639	positive regulation of myeloid cell differentiation	11/337	103/18903	2.27306e-06	2.00193e-05	1.07823e-05	CD74/INPP5D/KITLG/PRKCA/CSF1/TNF/CD4/IL12B/THPO/CSF3/IL34	11
BP	GO:0051090	regulation of DNA-binding transcription factor activity	24/337	454/18903	2.33244e-06	2.04989e-05	1.10406e-05	CX3CR1/TRIM22/CD40LG/BTK/SYK/AGT/TNFSF18/TLR4/LTF/TNF/BMP2/IL1B/XCL1/NR0B2/TNFSF4/BMP7/TNFAIP3/PLCG2/CSF3/WNT5A/IL18R1/NODAL/PRKCQ/IL6	24
BP	GO:0032633	interleukin-4 production	7/337	35/18903	2.35433e-06	2.06041e-05	1.10973e-05	HLA-E/IL33/CD40LG/SYK/CD3E/TNFSF4/PRKCQ	7
BP	GO:0032673	regulation of interleukin-4 production	7/337	35/18903	2.35433e-06	2.06041e-05	1.10973e-05	HLA-E/IL33/CD40LG/SYK/CD3E/TNFSF4/PRKCQ	7
BP	GO:0072576	liver morphogenesis	6/337	23/18903	2.39971e-06	2.09132e-05	1.12638e-05	TGFA/TNF/FGF1/TNFAIP3/PTN/IL6	6
BP	GO:0072677	eosinophil migration	6/337	23/18903	2.39971e-06	2.09132e-05	1.12638e-05	CCL2/CCL7/CCL11/CCL21/CCL5/IL4	6
BP	GO:0034103	regulation of tissue remodeling	10/337	85/18903	2.7172e-06	2.36305e-05	1.27273e-05	INPP5D/SYK/PRKCA/AGT/CSF1R/IL12B/MC4R/TNFAIP3/IL6/LEP	10
BP	GO:0008585	female gonad development	11/337	105/18903	2.75088e-06	2.38735e-05	1.28582e-05	A2M/KITLG/BMPR1B/AMHR2/SLIT2/VGF/PTX3/PGR/INHA/LEP/UMODL1	11
BP	GO:0007187	G protein-coupled receptor signaling pathway, coupled to cyclic nucleotide second messenger	9/337	67/18903	2.81615e-06	2.4389e-05	1.31359e-05	SSTR1/XCR1/CCL2/AGT/NPY/SSTR5/MC2R/TSHR/GALR3	9
BP	GO:0030224	monocyte differentiation	7/337	36/18903	2.87822e-06	2.48748e-05	1.33975e-05	CD74/INPP5D/CSF1/CSF1R/CD4/IL34/IL31RA	7
BP	GO:0048762	mesenchymal cell differentiation	17/337	252/18903	3.03269e-06	2.61554e-05	1.40872e-05	HGF/KITLG/NRG1/IGF1/NRP2/SEMA6A/BMP2/IL1B/SEMA3E/BMP7/TGFB2/SEMA6B/FGF8/WNT5A/SEMA6D/SEMA3B/IL6	17
BP	GO:0045348	positive regulation of MHC class II biosynthetic process	5/337	14/18903	3.06682e-06	2.62887e-05	1.4159e-05	IL33/CIITA/TLR4/AZU1/IL4	5
BP	GO:0050930	induction of positive chemotaxis	5/337	14/18903	3.06682e-06	2.62887e-05	1.4159e-05	IL16/NTF3/PGF/ARTN/AZU1	5
BP	GO:0030225	macrophage differentiation	8/337	51/18903	3.06712e-06	2.62887e-05	1.4159e-05	PRKCA/CSF1/CSF1R/CD4/INHA/IL34/IL31RA/ADIPOQ	8
BP	GO:0060907	positive regulation of macrophage cytokine production	6/337	24/18903	3.1518e-06	2.69589e-05	1.452e-05	CD74/HLA-G/TLR4/TLR7/PLCG2/WNT5A	6
BP	GO:0062012	regulation of small molecule metabolic process	20/337	339/18903	3.24364e-06	2.76875e-05	1.49124e-05	FABP3/PPARD/CD74/RORC/IGF1/TNF/CD244/PTAFR/BMP2/FGF1/IL1B/GPER1/GUCA2A/BMP6/ADCYAP1R1/RORA/NR4A3/IL4/LEP/ADIPOQ	20
BP	GO:0042063	gliogenesis	19/337	310/18903	3.29436e-06	2.80628e-05	1.51145e-05	CX3CR1/IL33/CCL2/NRG1/TLR4/CSF1/TNF/CSF1R/BMP2/IL1B/TGFB2/NR2E1/PTN/VIM/MAPT/AREG/AZU1/IL6/IL34	19
BP	GO:0010934	macrophage cytokine production	7/337	37/18903	3.49589e-06	2.9658e-05	1.59737e-05	CD74/HLA-G/TLR4/TLR7/TGFB2/PLCG2/WNT5A	7
BP	GO:0010935	regulation of macrophage cytokine production	7/337	37/18903	3.49589e-06	2.9658e-05	1.59737e-05	CD74/HLA-G/TLR4/TLR7/TGFB2/PLCG2/WNT5A	7
BP	GO:0050922	negative regulation of chemotaxis	9/337	69/18903	3.6177e-06	3.06289e-05	1.64966e-05	CCL2/SEMA6A/SEMA3E/SEMA6B/SLIT2/SLIT1/WNT5A/SEMA6D/SEMA3B	9
BP	GO:0014812	muscle cell migration	11/337	108/18903	3.63244e-06	3.06289e-05	1.64966e-05	PPARD/AGT/TLR4/IGF1/TACR1/CCL5/SLIT2/FGF9/NR4A3/SEMA6D/ADIPOQ	11
BP	GO:1902106	negative regulation of leukocyte differentiation	11/337	108/18903	3.63244e-06	3.06289e-05	1.64966e-05	CD74/HLA-G/INPP5D/TNFSF18/TLR4/LTF/FCGR2B/TNFSF4/IL4/INHA/ADIPOQ	11
BP	GO:0030003	cellular cation homeostasis	25/337	499/18903	3.71595e-06	3.12517e-05	1.6832e-05	PTPRC/XCR1/CCR5/CCL7/SLC40A1/LCN2/CCL19/AGT/GPER1/CCL11/XCL1/FASLG/LCK/CCL21/CCL5/IL1A/BMP6/TFR2/GDF2/PLCG2/WNT5A/SLC22A17/SLC11A1/TMPRSS6/IL13	25
BP	GO:0050853	B cell receptor signaling pathway	12/337	130/18903	3.72133e-06	3.12517e-05	1.6832e-05	CD79A/PTPRC/BTK/SYK/VAV3/ITK/IGHD/LCK/FCGR2B/IGKC/CMTM3/PLCG2	12
BP	GO:0055072	iron ion homeostasis	10/337	88/18903	3.73865e-06	3.13338e-05	1.68763e-05	B2M/SLC40A1/LCN2/LTF/BMP6/TFR2/GDF2/SLC22A17/SLC11A1/TMPRSS6	10
BP	GO:0060485	mesenchyme development	19/337	313/18903	3.78995e-06	3.16998e-05	1.70734e-05	HGF/KITLG/NRG1/IGF1/NRP2/SEMA6A/BMP2/IL1B/SEMA3E/BMP7/TGFB2/SEMA6B/FGF9/FGF8/WNT5A/SEMA6D/NODAL/SEMA3B/IL6	19
BP	GO:1901653	cellular response to peptide	21/337	373/18903	3.83535e-06	3.20151e-05	1.72433e-05	CYSLTR2/AGT/TLR4/IGF1/TNF/IL1B/GPER1/FCGR2B/VIM/NR4A2/NR4A3/TSHR/FGF21/PRKCQ/AGTR1/GHRHR/LEP/ADIPOQ/UMODL1/GCGR/GLP2R	21
BP	GO:0006898	receptor-mediated endocytosis	17/337	257/18903	3.95116e-06	3.29158e-05	1.77284e-05	B2M/EGF/SYK/ANGPT1/CCL19/CD14/CCL21/FCGR2B/C3/NTF3/TFR2/PLCG2/DKK1/SFTPD/IL4/ADIPOQ/MARCO	17
BP	GO:0034114	regulation of heterotypic cell-cell adhesion	6/337	25/18903	4.08515e-06	3.38962e-05	1.82564e-05	TNF/IL1B/LCK/FGA/BMP7/ADIPOQ	6
BP	GO:0050927	positive regulation of positive chemotaxis	6/337	25/18903	4.08515e-06	3.38962e-05	1.82564e-05	IL16/CCR4/NTF3/PGF/ARTN/AZU1	6
BP	GO:0019933	cAMP-mediated signaling	8/337	53/18903	4.13897e-06	3.42654e-05	1.84552e-05	DEFB1/SCTR/SCT/ADCYAP1R1/OPRL1/GAL/GIPR/GHRHR	8
BP	GO:0048864	stem cell development	10/337	89/18903	4.14613e-06	3.42654e-05	1.84552e-05	PTPRC/KITLG/NRG1/NRP2/SEMA6A/SEMA3E/BMP7/SEMA6B/SEMA6D/SEMA3B	10
BP	GO:0045580	regulation of T cell differentiation	14/337	179/18903	4.18506e-06	3.45184e-05	1.85915e-05	CD74/HLA-DOA/HLA-DRA/PTPRC/HLA-G/SYK/CCL19/TNFSF18/IL2RG/IL7/IL12B/TNFSF4/IL4/IL1RL2	14
BP	GO:0043368	positive T cell selection	7/337	38/18903	4.22022e-06	3.47395e-05	1.87106e-05	CD74/PTPRC/TNFSF18/IL12B/CD3E/CD3G/IL6	7
BP	GO:2001236	regulation of extrinsic apoptotic signaling pathway	13/337	155/18903	4.29082e-06	3.52509e-05	1.8986e-05	HGF/PTPRC/AGT/IGF1/TNF/IL1B/BMPR1B/GPER1/IL7/FGA/IL1A/TNFAIP3/IL4	13
BP	GO:0002864	regulation of acute inflammatory response to antigenic stimulus	5/337	15/18903	4.53311e-06	3.69493e-05	1.99008e-05	HLA-E/BTK/NPY/FCGR2B/C3	5
BP	GO:0034116	positive regulation of heterotypic cell-cell adhesion	5/337	15/18903	4.53311e-06	3.69493e-05	1.99008e-05	TNF/IL1B/LCK/FGA/BMP7	5
BP	GO:0042976	activation of Janus kinase activity	5/337	15/18903	4.53311e-06	3.69493e-05	1.99008e-05	PRLR/AGT/IL12B/CCL5/IL4	5
BP	GO:0045579	positive regulation of B cell differentiation	5/337	15/18903	4.53311e-06	3.69493e-05	1.99008e-05	INPP5D/BTK/SYK/IL2RG/IL7	5
BP	GO:0008406	gonad development	16/337	233/18903	4.72402e-06	3.843e-05	2.06983e-05	A2M/KITLG/BMPR1B/AMHR2/IL1A/TGFB2/SLIT2/VGF/FGF9/PTX3/FGF8/WNT5A/PGR/INHA/LEP/UMODL1	16
BP	GO:0014009	glial cell proliferation	8/337	54/18903	4.78413e-06	3.8843e-05	2.09207e-05	IL33/CSF1/TNF/CSF1R/IL1B/AREG/IL6/IL34	8
BP	GO:0034284	response to monosaccharide	15/337	207/18903	4.88088e-06	3.95513e-05	2.13022e-05	PPARD/TNF/ACVR1C/CMA1/GPER1/NR0B2/PCSK1/IL1A/OPRK1/NOX4/GIPR/FGF21/GHRHR/LEP/ADIPOQ	15
BP	GO:0044060	regulation of endocrine process	7/337	39/18903	5.06531e-06	4.09659e-05	2.20641e-05	AGT/OPRK1/BMP6/GAL/AGTR1/INHA/LEP	7
BP	GO:0097553	calcium ion transmembrane import into cytosol	14/337	182/18903	5.07875e-06	4.09949e-05	2.20797e-05	PTPRC/XCR1/CALCR/CCR5/CCL19/GPER1/XCL1/FASLG/LCK/CCL21/ADCYAP1R1/PLCG2/EPO/IL13	14
BP	GO:0035821	modulation of process of another organism	6/337	26/18903	5.23139e-06	4.19824e-05	2.26116e-05	SLPI/REG3G/SYK/LTF/RNASE7/DEFA4	6
BP	GO:0050926	regulation of positive chemotaxis	6/337	26/18903	5.23139e-06	4.19824e-05	2.26116e-05	IL16/CCR4/NTF3/PGF/ARTN/AZU1	6
BP	GO:1905523	positive regulation of macrophage migration	6/337	26/18903	5.23139e-06	4.19824e-05	2.26116e-05	CX3CR1/TNFSF18/CSF1/CSF1R/CCL5/IL34	6
BP	GO:0030100	regulation of endocytosis	15/337	209/18903	5.4882e-06	4.39584e-05	2.36759e-05	B2M/EGF/SYK/ANGPT1/CCL19/CD14/CCL21/C3/NTF3/TFR2/PLCG2/DKK1/WNT5A/IL4/ADIPOQ	15
BP	GO:0030900	forebrain development	21/337	383/18903	5.7761e-06	4.61755e-05	2.487e-05	B2M/SSTR1/RARB/NRG1/NPY/NRP2/CSF1R/BMP2/SEMA3E/PCSK1/SCT/SEMA6B/SLIT2/NR2E1/SLIT1/NR4A2/DKK1/FGF8/WNT5A/RAC3/GHRHR	21
BP	GO:2000106	regulation of leukocyte apoptotic process	10/337	93/18903	6.18587e-06	4.93563e-05	2.65832e-05	CD74/BTK/KITLG/CCL19/PDCD1/CCL21/CCL5/CD3G/WNT5A/PRKCQ	10
BP	GO:0060986	endocrine hormone secretion	8/337	56/18903	6.33241e-06	5.04288e-05	2.71608e-05	AGT/IL1B/OPRK1/BMP6/GAL/AGTR1/INHA/LEP	8
BP	GO:0006801	superoxide metabolic process	9/337	74/18903	6.52521e-06	5.16264e-05	2.78058e-05	DUOX2/SYK/AGT/CYBB/BMP7/MAPT/NOX4/MPO/NOX3	9
BP	GO:0032732	positive regulation of interleukin-1 production	9/337	74/18903	6.52521e-06	5.16264e-05	2.78058e-05	IL16/CCL19/TLR4/TNF/IGHD/ORM1/WNT5A/AZU1/IL6	9
BP	GO:0051403	stress-activated MAPK cascade	16/337	239/18903	6.53164e-06	5.16264e-05	2.78058e-05	HGF/CCL19/AGT/TLR4/TLR7/TNF/BMP2/IL1B/CCL21/FCGR2B/IL1A/OPRK1/TGFB2/TNFRSF19/WNT5A/LEP	16
BP	GO:0034767	positive regulation of ion transmembrane transport	14/337	186/18903	6.53247e-06	5.16264e-05	2.78058e-05	CALCR/CCL2/AGT/KCNH2/PTAFR/CTSS/GPER1/XCL1/HSPA2/OPRK1/ADCYAP1R1/PLCG2/GAL/IL13	14
BP	GO:0002407	dendritic cell chemotaxis	6/337	27/18903	6.62566e-06	5.20659e-05	2.80425e-05	PIK3CG/CCR5/CCL19/TNFSF18/CCL21/CCL5	6
BP	GO:1901623	regulation of lymphocyte chemotaxis	6/337	27/18903	6.62566e-06	5.20659e-05	2.80425e-05	CCL2/CCL7/XCL1/CCL21/CCL5/WNT5A	6
BP	GO:1902932	positive regulation of alcohol biosynthetic process	6/337	27/18903	6.62566e-06	5.20659e-05	2.80425e-05	CD244/PTAFR/FGF1/GPER1/BMP6/ADCYAP1R1	6
BP	GO:0051924	regulation of calcium ion transport	17/337	268/18903	6.90535e-06	5.41614e-05	2.91712e-05	PIK3CG/SEMG1/CALCR/EGF/IL16/CCL2/AGT/CD4/GPER1/XCL1/HSPA2/CCL5/ADCYAP1R1/OPRL1/PLCG2/EPO/IL13	17
BP	GO:0030879	mammary gland development	12/337	138/18903	6.92294e-06	5.41971e-05	2.91904e-05	TGFA/EGF/PRLR/NRG1/CSF1/CSF1R/CCL11/WNT5A/AREG/PGR/PRL/GHRHR	12
BP	GO:0002221	pattern recognition receptor signaling pathway	14/337	187/18903	6.94913e-06	5.42999e-05	2.92458e-05	REG3G/BTK/TLR4/TLR7/LTF/TNF/COLEC12/CTSS/CD14/COLEC10/FCN2/TNFAIP3/PLCG2/MBL2	14
BP	GO:0045124	regulation of bone resorption	7/337	41/18903	7.18082e-06	5.59001e-05	3.01076e-05	INPP5D/SYK/PRKCA/CSF1R/MC4R/TNFAIP3/IL6	7
BP	GO:0050850	positive regulation of calcium-mediated signaling	7/337	41/18903	7.18082e-06	5.59001e-05	3.01076e-05	SYK/NRG1/IGF1/TNF/CD4/CD3E/PLCG2	7
BP	GO:0007178	transmembrane receptor protein serine/threonine kinase signaling pathway	21/337	390/18903	7.6242e-06	5.92408e-05	3.19069e-05	ACVR1C/BMP2/BMPR1B/AMHR2/GDF10/GREM2/BMP7/BMP6/TGFB2/LEFTY1/LTBP1/FGF9/GDF2/VIM/DKK1/INHBE/WNT5A/WFIKKN1/TMPRSS6/NODAL/INHA	21
BP	GO:0007565	female pregnancy	14/337	189/18903	7.8538e-06	6.09109e-05	3.28064e-05	PPARD/ENDOU/PRLR/AGT/ACVR1C/IL1B/PTN/AGRP/PGF/PGR/EPO/NODAL/PRL/LEP	14
BP	GO:0010959	regulation of metal ion transport	22/337	423/18903	8.01288e-06	6.20289e-05	3.34086e-05	B2M/PIK3CG/SEMG1/CALCR/EGF/IL16/CCL2/AGT/KCNH2/CD4/GPER1/XCL1/HSPA2/CCL5/OPRK1/ADCYAP1R1/OPRL1/PLCG2/FGF12/GAL/EPO/IL13	22
BP	GO:0070664	negative regulation of leukocyte proliferation	10/337	96/18903	8.23829e-06	6.36554e-05	3.42846e-05	IL33/HLA-G/INPP5D/BTK/SDC4/XCL1/FCGR2B/TNFAIP3/SFTPD/GAL	10
BP	GO:0061564	axon development	24/337	490/18903	8.5253e-06	6.57508e-05	3.54132e-05	NRP2/CSF1R/LGR6/SEMA6A/CCK/SEMA3E/BMPR1B/BMP7/APOD/SEMA6B/SLIT2/NR2E1/SLIT1/PTN/MAPT/NR4A2/WNT5A/SEMA6D/ARTN/TUBB3/BDNF/PRKCQ/SEMA3B/TNC	24
BP	GO:0048638	regulation of developmental growth	19/337	332/18903	8.83218e-06	6.79915e-05	3.662e-05	PPARD/IGF1/CSF1/SEMA6A/SEMA3E/IL7/SEMA6B/SLIT1/FGF9/NPPC/MAPT/FGF8/WNT5A/SEMA6D/BDNF/SEMA3B/PRL/GHRHR/LEP	19
BP	GO:0008217	regulation of blood pressure	14/337	191/18903	8.86133e-06	6.80897e-05	3.66729e-05	AGT/NPY/CTSG/TNF/PTAFR/TACR1/CMA1/OPRL1/ADM2/UTS2/AGTR1/LEP/ADIPOQ/GCGR	14
BP	GO:0043523	regulation of neuron apoptotic process	15/337	218/18903	9.13898e-06	7.00936e-05	3.77522e-05	CX3CR1/CCL2/ANGPT1/TNF/SEMA3E/FASLG/NTF3/CRLF1/CNTFR/TGFB2/NFATC4/NR4A2/FGF8/PRKCG/BDNF	15
BP	GO:0001649	osteoblast differentiation	16/337	246/18903	9.40383e-06	7.17167e-05	3.86264e-05	HGF/IGF1/LTF/TNF/BMP2/BMPR1B/GDF10/BMP7/BMP6/FGF9/RORB/GDF2/NPPC/AREG/IL6/TNC	16
BP	GO:0031098	stress-activated protein kinase signaling cascade	16/337	246/18903	9.40383e-06	7.17167e-05	3.86264e-05	HGF/CCL19/AGT/TLR4/TLR7/TNF/BMP2/IL1B/CCL21/FCGR2B/IL1A/OPRK1/TGFB2/TNFRSF19/WNT5A/LEP	16
BP	GO:0001755	neural crest cell migration	8/337	59/18903	9.43686e-06	7.17167e-05	3.86264e-05	KITLG/NRP2/SEMA6A/SEMA3E/BMP7/SEMA6B/SEMA6D/SEMA3B	8
BP	GO:0002763	positive regulation of myeloid leukocyte differentiation	8/337	59/18903	9.43686e-06	7.17167e-05	3.86264e-05	CD74/KITLG/PRKCA/CSF1/TNF/CD4/IL12B/IL34	8
BP	GO:0051785	positive regulation of nuclear division	8/337	59/18903	9.43686e-06	7.17167e-05	3.86264e-05	TGFA/EGF/IGF1/TNF/IL1B/IL1A/FGF8/WNT5A	8
BP	GO:0048661	positive regulation of smooth muscle cell proliferation	10/337	98/18903	9.91237e-06	7.5056e-05	4.04249e-05	AGT/TLR4/IGF1/TNF/PTAFR/CCL5/FGF9/NR4A3/IL13/IL6	10
BP	GO:0120162	positive regulation of cold-induced thermogenesis	10/337	98/18903	9.91237e-06	7.5056e-05	4.04249e-05	SYK/PRLR/LCN2/TSHR/FGF21/IL4/FABP4/IL13/LEP/ADIPOQ	10
BP	GO:0002251	organ or tissue specific immune response	7/337	43/18903	9.98261e-06	7.53134e-05	4.05636e-05	LTF/DEFB1/XCL1/IL4/RNASE2/IL6/DEFA4	7
BP	GO:0042554	superoxide anion generation	7/337	43/18903	9.98261e-06	7.53134e-05	4.05636e-05	DUOX2/SYK/AGT/CYBB/MAPT/NOX4/NOX3	7
BP	GO:0003156	regulation of animal organ formation	6/337	29/18903	1.03175e-05	7.75586e-05	4.17728e-05	BMP2/FGF1/BMP7/DKK1/FGF8/WNT5A	6
BP	GO:0010575	positive regulation of vascular endothelial growth factor production	6/337	29/18903	1.03175e-05	7.75586e-05	4.17728e-05	IL1B/C3/IL1A/RORA/NODAL/IL6	6
BP	GO:0045599	negative regulation of fat cell differentiation	8/337	60/18903	1.07216e-05	8.04504e-05	4.33303e-05	SORT1/TNF/BMP2/GPER1/RORA/WNT5A/IL6/ADIPOQ	8
BP	GO:0090100	positive regulation of transmembrane receptor protein serine/threonine kinase signaling pathway	11/337	121/18903	1.0945e-05	8.19789e-05	4.41536e-05	BMP2/GDF10/BMP7/BMP6/TGFB2/LEFTY1/FGF9/GDF2/INHBE/NODAL/INHA	11
BP	GO:0032872	regulation of stress-activated MAPK cascade	14/337	195/18903	1.12256e-05	8.39297e-05	4.52043e-05	HGF/CCL19/TLR4/TNF/BMP2/IL1B/CCL21/FCGR2B/IL1A/OPRK1/TGFB2/TNFRSF19/WNT5A/LEP	14
BP	GO:0014911	positive regulation of smooth muscle cell migration	7/337	44/18903	1.16912e-05	8.67862e-05	4.67428e-05	AGT/TLR4/IGF1/CCL5/FGF9/NR4A3/SEMA6D	7
BP	GO:0045840	positive regulation of mitotic nuclear division	7/337	44/18903	1.16912e-05	8.67862e-05	4.67428e-05	TGFA/EGF/IGF1/TNF/IL1B/IL1A/FGF8	7
BP	GO:0071526	semaphorin-plexin signaling pathway	7/337	44/18903	1.16912e-05	8.67862e-05	4.67428e-05	MET/NRP2/SEMA6A/SEMA3E/SEMA6B/SEMA6D/SEMA3B	7
BP	GO:0072538	T-helper 17 type immune response	7/337	44/18903	1.16912e-05	8.67862e-05	4.67428e-05	RORC/TNFSF18/IL12B/RORA/IL4/PRKCQ/IL6	7
BP	GO:0090497	mesenchymal cell migration	8/337	61/18903	1.21505e-05	9.00353e-05	4.84927e-05	KITLG/NRP2/SEMA6A/SEMA3E/BMP7/SEMA6B/SEMA6D/SEMA3B	8
BP	GO:0002827	positive regulation of T-helper 1 type immune response	5/337	18/18903	1.23762e-05	9.13817e-05	4.92179e-05	IL1B/IL12B/XCL1/SLC11A1/IL18R1	5
BP	GO:0150078	positive regulation of neuroinflammatory response	5/337	18/18903	1.23762e-05	9.13817e-05	4.92179e-05	IL33/TNF/IL1B/PLCG2/IL6	5
BP	GO:1904064	positive regulation of cation transmembrane transport	13/337	171/18903	1.25311e-05	9.23616e-05	4.97457e-05	CALCR/CCL2/AGT/KCNH2/CTSS/GPER1/XCL1/HSPA2/OPRK1/ADCYAP1R1/PLCG2/GAL/IL13	13
BP	GO:0072539	T-helper 17 cell differentiation	6/337	30/18903	1.27045e-05	9.34738e-05	5.03447e-05	RORC/TNFSF18/IL12B/RORA/IL4/IL6	6
BP	GO:0002224	toll-like receptor signaling pathway	11/337	123/18903	1.28001e-05	9.40104e-05	5.06337e-05	REG3G/BTK/TLR4/TLR7/LTF/TNF/COLEC12/CTSS/CD14/TNFAIP3/PLCG2	11
BP	GO:0045598	regulation of fat cell differentiation	12/337	147/18903	1.3211e-05	9.65171e-05	5.19838e-05	PPARD/SORT1/RORC/TNF/BMP2/GPER1/BMP7/RORA/WNT5A/IL6/LEP/ADIPOQ	12
BP	GO:0106106	cold-induced thermogenesis	12/337	147/18903	1.3211e-05	9.65171e-05	5.19838e-05	SYK/PRLR/LCN2/TLR4/TSHR/IL18R1/FGF21/IL4/FABP4/IL13/LEP/ADIPOQ	12
BP	GO:0120161	regulation of cold-induced thermogenesis	12/337	147/18903	1.3211e-05	9.65171e-05	5.19838e-05	SYK/PRLR/LCN2/TLR4/TSHR/IL18R1/FGF21/IL4/FABP4/IL13/LEP/ADIPOQ	12
BP	GO:0070302	regulation of stress-activated protein kinase signaling cascade	14/337	198/18903	1.33488e-05	9.73526e-05	5.24338e-05	HGF/CCL19/TLR4/TNF/BMP2/IL1B/CCL21/FCGR2B/IL1A/OPRK1/TGFB2/TNFRSF19/WNT5A/LEP	14
BP	GO:0030517	negative regulation of axon extension	7/337	45/18903	1.36349e-05	9.90916e-05	5.33705e-05	SEMA6A/SEMA3E/SEMA6B/SLIT1/WNT5A/SEMA6D/SEMA3B	7
BP	GO:0031295	T cell costimulation	7/337	45/18903	1.36349e-05	9.90916e-05	5.33705e-05	CD40LG/CCL19/CD3E/LCK/CCL21/TNFSF4/TNFSF13B	7
BP	GO:1904036	negative regulation of epithelial cell apoptotic process	8/337	62/18903	1.37366e-05	9.96561e-05	5.36745e-05	TEK/ANGPT1/FGA/TNFAIP3/ANGPTL4/FGF21/IL4/IL13	8
BP	GO:0051209	release of sequestered calcium ion into cytosol	11/337	124/18903	1.38259e-05	0.000100129	5.39294e-05	PTPRC/XCR1/CCR5/CCL19/GPER1/XCL1/FASLG/LCK/CCL21/PLCG2/IL13	11
BP	GO:2001233	regulation of apoptotic signaling pathway	20/337	374/18903	1.38996e-05	0.000100488	5.41225e-05	HGF/CX3CR1/CD74/PTPRC/AGT/IGF1/TNF/IL1B/BMPR1B/GPER1/IL7/LCK/FGA/IL1A/TNFAIP3/NFATC4/NR4A2/IL4/EPO/BDNF	20
BP	GO:0051651	maintenance of location in cell	15/337	226/18903	1.40533e-05	0.000101423	5.4626e-05	PTPRC/XCR1/CCR5/LCN2/CCL19/CD4/ALB/GPER1/XCL1/FASLG/LCK/CCL21/PDIA2/PLCG2/IL13	15
BP	GO:0051402	neuron apoptotic process	16/337	255/18903	1.47255e-05	0.00010609	5.71396e-05	CX3CR1/CCL2/ANGPT1/TNF/THRB/SEMA3E/FASLG/NTF3/CRLF1/CNTFR/TGFB2/NFATC4/NR4A2/FGF8/PRKCG/BDNF	16
BP	GO:0051283	negative regulation of sequestering of calcium ion	11/337	125/18903	1.49223e-05	0.000107322	5.78033e-05	PTPRC/XCR1/CCR5/CCL19/GPER1/XCL1/FASLG/LCK/CCL21/PLCG2/IL13	11
BP	GO:0021953	central nervous system neuron differentiation	13/337	174/18903	1.51015e-05	0.000108423	5.83962e-05	B2M/NPY/NRP2/CSF1R/SEMA3E/BMPR1B/SLIT2/RORA/NR2E1/MAPT/NR4A2/RAC3/LEP	13
BP	GO:0050796	regulation of insulin secretion	12/337	149/18903	1.51475e-05	0.000108566	5.84731e-05	PPARD/TNF/ACVR1C/IL1B/GPER1/NR0B2/CCL5/SSTR5/GIPR/TRH/IL6/LEP	12
BP	GO:0060603	mammary gland duct morphogenesis	6/337	31/18903	1.55187e-05	0.000111035	5.9803e-05	CSF1/CSF1R/CCL11/WNT5A/AREG/PGR	6
BP	GO:0002920	regulation of humoral immune response	7/337	46/18903	1.58385e-05	0.000112934	6.08259e-05	PTPRC/A2M/CR2/TNF/IL1B/FCGR2B/C3	7
BP	GO:0031640	killing of cells of another organism	7/337	46/18903	1.58385e-05	0.000112934	6.08259e-05	SEMG1/SYK/LTF/LYZ/GNLY/HTN3/DEFA4	7
BP	GO:0002544	chronic inflammatory response	5/337	19/18903	1.65516e-05	0.000117016	6.30242e-05	TNF/CCL11/CCL5/TNFAIP3/IL4	5
BP	GO:0010759	positive regulation of macrophage chemotaxis	5/337	19/18903	1.65516e-05	0.000117016	6.30242e-05	TNFSF18/CSF1/CSF1R/CCL5/IL34	5
BP	GO:0035743	CD4-positive, alpha-beta T cell cytokine production	5/337	19/18903	1.65516e-05	0.000117016	6.30242e-05	IL1B/XCL1/IL18R1/IL4/IL6	5
BP	GO:0045346	regulation of MHC class II biosynthetic process	5/337	19/18903	1.65516e-05	0.000117016	6.30242e-05	IL33/CIITA/TLR4/AZU1/IL4	5
BP	GO:0045953	negative regulation of natural killer cell mediated cytotoxicity	5/337	19/18903	1.65516e-05	0.000117016	6.30242e-05	HLA-E/HLA-B/HLA-F/HLA-A/HLA-G	5
BP	GO:0022408	negative regulation of cell-cell adhesion	14/337	202/18903	1.67279e-05	0.000118061	6.35872e-05	CD74/HLA-G/SDC4/TNFSF18/CTSG/BMP2/XCL1/CCL21/FCGR2B/TNFSF4/BMP6/SFTPD/IL4/ADIPOQ	14
BP	GO:0014032	neural crest cell development	9/337	83/18903	1.68625e-05	0.00011881	6.39904e-05	KITLG/NRG1/NRP2/SEMA6A/SEMA3E/BMP7/SEMA6B/SEMA6D/SEMA3B	9
BP	GO:0010634	positive regulation of epithelial cell migration	13/337	176/18903	1.70622e-05	0.000120013	6.46385e-05	PIK3CG/MET/EGF/TEK/PRKCA/ANGPT1/AGT/NRP2/TACR1/FGF1/TGFB2/PLCG2/WNT5A	13
BP	GO:0010594	regulation of endothelial cell migration	15/337	230/18903	1.7295e-05	0.00012124	6.52995e-05	PIK3CG/MET/EGF/TEK/PRKCA/ANGPT1/AGT/NRP2/TNF/FGF1/SLIT2/NR2E1/PTN/GDF2/WNT5A	15
BP	GO:0050817	coagulation	15/337	230/18903	1.7295e-05	0.00012124	6.52995e-05	PIK3CG/SEMG1/CD40LG/SYK/VAV3/PRKCA/CTSG/TLR4/LCK/FGA/VAV2/PLCG2/SERPIND1/PRKCQ/IL6	15
BP	GO:0051282	regulation of sequestering of calcium ion	11/337	127/18903	1.73434e-05	0.000121375	6.5372e-05	PTPRC/XCR1/CCR5/CCL19/GPER1/XCL1/FASLG/LCK/CCL21/PLCG2/IL13	11
BP	GO:0002218	activation of innate immune response	8/337	64/18903	1.7435e-05	0.000121811	6.56068e-05	SYK/TLR4/COLEC10/KLRC3/KLRC4/FCN2/PLCG2/MBL2	8
BP	GO:0051051	negative regulation of transport	23/337	479/18903	1.8054e-05	0.000125923	6.7822e-05	HLA-F/CD74/SEMG1/EGF/ANGPT1/NRG1/KCNH2/TNF/ACVR1C/IL1B/IL12B/FCGR2B/OPRK1/SCT/IL11/APOD/OPRL1/PRTN3/EPO/TRH/INHA/LEP/ADIPOQ	23
BP	GO:0002701	negative regulation of production of molecular mediator of immune response	7/337	47/18903	1.83282e-05	0.000127196	6.85072e-05	HLA-F/IL33/ANGPT1/TNF/XCL1/FCGR2B/TGFB2	7
BP	GO:0097028	dendritic cell differentiation	7/337	47/18903	1.83282e-05	0.000127196	6.85072e-05	HLA-B/HLA-G/CCL19/FCGR2B/FLT3/PRTN3/IL4	7
BP	GO:0140353	lipid export from cell	7/337	47/18903	1.83282e-05	0.000127196	6.85072e-05	AGT/IL1B/IL1A/BMP6/GAL/AGTR1/LEP	7
BP	GO:0043552	positive regulation of phosphatidylinositol 3-kinase activity	6/337	32/18903	1.88152e-05	0.000129925	6.99771e-05	VAV3/TEK/CCL19/CCL21/FLT3/VAV2	6
BP	GO:0061036	positive regulation of cartilage development	6/337	32/18903	1.88152e-05	0.000129925	6.99771e-05	BMP2/BMPR1B/BMP6/BMP1/GDF2/WNT5A	6
BP	GO:1901889	negative regulation of cell junction assembly	6/337	32/18903	1.88152e-05	0.000129925	6.99771e-05	TNF/IL1B/APOD/SLIT1/DKK1/WNT5A	6
BP	GO:0002676	regulation of chronic inflammatory response	4/337	10/18903	1.91449e-05	0.000131113	7.0617e-05	TNF/CCL5/TNFAIP3/IL4	4
BP	GO:0045657	positive regulation of monocyte differentiation	4/337	10/18903	1.91449e-05	0.000131113	7.0617e-05	CD74/CSF1/CD4/IL34	4
BP	GO:0071377	cellular response to glucagon stimulus	4/337	10/18903	1.91449e-05	0.000131113	7.0617e-05	CYSLTR2/FGF21/GCGR/GLP2R	4
BP	GO:1905809	negative regulation of synapse organization	4/337	10/18903	1.91449e-05	0.000131113	7.0617e-05	SLIT1/NFATC4/DKK1/WNT5A	4
BP	GO:2000347	positive regulation of hepatocyte proliferation	4/337	10/18903	1.91449e-05	0.000131113	7.0617e-05	TNF/FGF1/TNFAIP3/PTN	4
BP	GO:0090092	regulation of transmembrane receptor protein serine/threonine kinase signaling pathway	17/337	290/18903	1.92982e-05	0.000131945	7.10652e-05	BMP2/GDF10/GREM2/BMP7/BMP6/TGFB2/LEFTY1/LTBP1/FGF9/GDF2/DKK1/INHBE/WNT5A/WFIKKN1/TMPRSS6/NODAL/INHA	17
BP	GO:0060560	developmental growth involved in morphogenesis	15/337	233/18903	2.01442e-05	0.000137503	7.40588e-05	CSF1/NRP2/SEMA6A/FGF1/SEMA3E/CCL11/SEMA6B/SLIT2/SLIT1/MAPT/WNT5A/SEMA6D/AREG/BDNF/SEMA3B	15
BP	GO:0021954	central nervous system neuron development	9/337	85/18903	2.04739e-05	0.000139525	7.51475e-05	NPY/NRP2/SEMA3E/SLIT2/NR2E1/MAPT/NR4A2/RAC3/LEP	9
BP	GO:0043524	negative regulation of neuron apoptotic process	12/337	154/18903	2.11098e-05	0.000143622	7.73546e-05	CX3CR1/CCL2/ANGPT1/SEMA3E/NTF3/CRLF1/CNTFR/NFATC4/NR4A2/FGF8/PRKCG/BDNF	12
BP	GO:0002716	negative regulation of natural killer cell mediated immunity	5/337	20/18903	2.17475e-05	0.000147479	7.94315e-05	HLA-E/HLA-B/HLA-F/HLA-A/HLA-G	5
BP	GO:0045655	regulation of monocyte differentiation	5/337	20/18903	2.17475e-05	0.000147479	7.94315e-05	CD74/INPP5D/CSF1/CD4/IL34	5
BP	GO:0006879	cellular iron ion homeostasis	8/337	66/18903	2.19359e-05	0.000148514	7.9989e-05	SLC40A1/LCN2/BMP6/TFR2/GDF2/SLC22A17/SLC11A1/TMPRSS6	8
BP	GO:0072593	reactive oxygen species metabolic process	15/337	235/18903	2.22671e-05	0.000150511	8.1065e-05	DUOX2/SYK/AGT/TLR4/TNF/CYBB/BMP7/PLCG2/MAPT/SFTPD/NOX4/MPO/AGTR1/NOX3/LEP	15
BP	GO:0019935	cyclic-nucleotide-mediated signaling	9/337	86/18903	2.25132e-05	0.000151927	8.18277e-05	DEFB1/SCTR/SCT/ADCYAP1R1/OPRL1/NPPC/GAL/GIPR/GHRHR	9
BP	GO:0002431	Fc receptor mediated stimulatory signaling pathway	6/337	33/18903	2.26536e-05	0.000152134	8.19391e-05	PTPRC/SYK/VAV3/FCGR2B/VAV2/NR4A3	6
BP	GO:0002828	regulation of type 2 immune response	6/337	33/18903	2.26536e-05	0.000152134	8.19391e-05	CD74/IL33/XCL1/TNFSF4/IL4/IL6	6
BP	GO:0045577	regulation of B cell differentiation	6/337	33/18903	2.26536e-05	0.000152134	8.19391e-05	INPP5D/BTK/SYK/IL2RG/IL7/INHA	6
BP	GO:0051208	sequestering of calcium ion	11/337	131/18903	2.3223e-05	0.000155706	8.3863e-05	PTPRC/XCR1/CCR5/CCL19/GPER1/XCL1/FASLG/LCK/CCL21/PLCG2/IL13	11
BP	GO:0033628	regulation of cell adhesion mediated by integrin	7/337	49/18903	2.42809e-05	0.000162537	8.75422e-05	PIK3CG/SYK/CD3E/CCL21/CCL5/TGFB2/RAC3	7
BP	GO:0045576	mast cell activation	8/337	67/18903	2.45284e-05	0.000163667	8.81505e-05	PIK3CG/BTK/SYK/PTGDR/LCP2/NR4A3/IL4/IL13	8
BP	GO:1901224	positive regulation of NIK/NF-kappaB signaling	8/337	67/18903	2.45284e-05	0.000163667	8.81505e-05	CCL19/TLR4/TLR7/TNF/IL1B/CD14/IL12B/IL18R1	8
BP	GO:0048872	homeostasis of number of cells	17/337	296/18903	2.50692e-05	0.000167008	8.99498e-05	B2M/CX3CR1/CD74/INPP5D/BTK/KITLG/SLC40A1/CSF1/CCR4/IL7/FLT3/TNFAIP3/TNFSF13B/RAC3/EPO/INHA/IL6	17
BP	GO:0007189	adenylate cyclase-activating G protein-coupled receptor signaling pathway	12/337	157/18903	2.55923e-05	0.000170219	9.16795e-05	CALCR/PRKCA/GPER1/MC4R/MC2R/OPRL1/ADM2/TSHR/GIPR/UCN2/GHRHR/GCGR	12
BP	GO:0008361	regulation of cell size	13/337	183/18903	2.57964e-05	0.000171303	9.22634e-05	VAV3/SEMA6A/SEMA3E/SCTR/SCT/VAV2/SEMA6B/SLIT1/MAPT/WNT5A/SEMA6D/BDNF/SEMA3B	13
BP	GO:0002021	response to dietary excess	6/337	34/18903	2.70982e-05	0.000178903	9.63565e-05	ACVR1C/SCTR/MC4R/SCT/VGF/LEP	6
BP	GO:0036336	dendritic cell migration	6/337	34/18903	2.70982e-05	0.000178903	9.63565e-05	PIK3CG/CCR5/CCL19/TNFSF18/CCL21/CCL5	6
BP	GO:0110110	positive regulation of animal organ morphogenesis	6/337	34/18903	2.70982e-05	0.000178903	9.63565e-05	CSF1/BMP2/FGF1/DKK1/FGF8/WNT5A	6
BP	GO:0032370	positive regulation of lipid transport	9/337	88/18903	2.7113e-05	0.000178903	9.63565e-05	FABP3/CETP/IL1B/FASLG/IL1A/BMP6/GAL/PLTP/ADIPOQ	9
BP	GO:0001655	urogenital system development	19/337	360/18903	2.73134e-05	0.00017994	9.6915e-05	RARB/PRLR/SDC4/TEK/ANGPT1/AGT/BMP2/FGF1/CRLF1/BMP7/BMP6/TGFB2/SLIT2/FGF8/WNT5A/LGR5/AGTR1/TNC/ADIPOQ	19
BP	GO:0007252	I-kappaB phosphorylation	5/337	21/18903	2.81282e-05	0.000184722	9.94905e-05	CX3CR1/TLR4/TLR7/TNF/PLCG2	5
BP	GO:0140131	positive regulation of lymphocyte chemotaxis	5/337	21/18903	2.81282e-05	0.000184722	9.94905e-05	CCL7/XCL1/CCL21/CCL5/WNT5A	5
BP	GO:0052547	regulation of peptidase activity	22/337	459/18903	2.82524e-05	0.000185245	9.97724e-05	SLPI/HGF/PSMB8/SEMG1/A2M/SYK/AGT/LTF/TNF/ACVR1C/GPER1/FASLG/LCK/C3/WFDC2/MAPT/SERPIND1/WFIKKN1/BIRC5/NODAL/LCN1/UMODL1	22
BP	GO:2000253	positive regulation of feeding behavior	4/337	11/18903	2.96623e-05	0.000193779	0.000104369	NPY/OPRK1/AGRP/NR4A3	4
BP	GO:0003018	vascular process in circulatory system	16/337	270/18903	2.96886e-05	0.000193779	0.000104369	PPARD/CYSLTR1/TEK/ANGPT1/AGT/TNF/TACR1/GPER1/FGA/BMP6/SLIT2/NPPC/AZU1/UTS2/AGTR1/LEP	16
BP	GO:0032611	interleukin-1 beta production	10/337	111/18903	2.97404e-05	0.000193779	0.000104369	CX3CR1/CCL19/TLR4/IGF1/TNF/ORM1/TNFAIP3/WNT5A/AZU1/IL6	10
BP	GO:0032651	regulation of interleukin-1 beta production	10/337	111/18903	2.97404e-05	0.000193779	0.000104369	CX3CR1/CCL19/TLR4/IGF1/TNF/ORM1/TNFAIP3/WNT5A/AZU1/IL6	10
BP	GO:0052548	regulation of endopeptidase activity	21/337	428/18903	3.05783e-05	0.000198927	0.000107141	SLPI/HGF/PSMB8/SEMG1/A2M/SYK/AGT/LTF/TNF/ACVR1C/GPER1/FASLG/LCK/C3/WFDC2/MAPT/SERPIND1/WFIKKN1/BIRC5/NODAL/LCN1	21
BP	GO:0022602	ovulation cycle process	7/337	51/18903	3.17418e-05	0.000206173	0.000111044	A2M/BMPR1B/TGFB2/SLIT2/PTX3/PGR/LEP	7
BP	GO:0014823	response to activity	8/337	70/18903	3.38948e-05	0.000219814	0.000118391	PPARD/AGT/TNF/BMP6/FGF21/IL6/LEP/ADIPOQ	8
BP	GO:0030308	negative regulation of cell growth	13/337	188/18903	3.42254e-05	0.000221612	0.00011936	PPARD/AGT/SEMA6A/SEMA3E/TGFB2/SEMA6B/SLIT2/SLIT1/GDF2/OSGIN1/WNT5A/SEMA6D/SEMA3B	13
BP	GO:1904659	glucose transmembrane transport	10/337	113/18903	3.47197e-05	0.000224114	0.000120707	PPARD/SORT1/IGF1/TNF/IL1B/C3/NR4A3/FGF21/LEP/ADIPOQ	10
BP	GO:1905954	positive regulation of lipid localization	10/337	113/18903	3.47197e-05	0.000224114	0.000120707	FABP3/CETP/IL1B/FASLG/C3/IL1A/BMP6/GAL/PLTP/ADIPOQ	10
BP	GO:1901216	positive regulation of neuron death	9/337	91/18903	3.54945e-05	0.00022876	0.00012321	TLR4/TNF/FASLG/FCGR2B/TGFB2/NFATC4/MAPT/DKK1/WNT5A	9
BP	GO:0043303	mast cell degranulation	7/337	52/18903	3.61242e-05	0.000231952	0.000124928	PIK3CG/BTK/SYK/PTGDR/NR4A3/IL4/IL13	7
BP	GO:1902930	regulation of alcohol biosynthetic process	7/337	52/18903	3.61242e-05	0.000231952	0.000124928	CD244/PTAFR/BMP2/FGF1/GPER1/BMP6/ADCYAP1R1	7
BP	GO:0043123	positive regulation of I-kappaB kinase/NF-kappaB signaling	13/337	189/18903	3.61733e-05	0.000231952	0.000124928	CD74/TRIM22/CCL19/TLR4/LTF/TNF/CD4/IL1B/FASLG/CCL21/IL1A/TNFRSF19/ADIPOQ	13
BP	GO:0006869	lipid transport	21/337	433/18903	3.62128e-05	0.000231952	0.000124928	FABP3/PPARD/FABP2/CETP/EGF/SYK/AGT/RBP5/IL1B/NR0B2/FASLG/IL1A/FABP6/BMP6/APOD/GAL/FABP4/AGTR1/PLTP/LEP/ADIPOQ	21
BP	GO:0006979	response to oxidative stress	21/337	434/18903	3.74454e-05	0.000239478	0.000128982	HGF/DUOX2/MET/BTK/TLR4/TNF/TACR1/MICB/IL1A/BMP7/APOD/TNFAIP3/MAPT/NR4A2/NR4A3/AREG/MPO/ANGPTL7/IL6/MBL2/ADIPOQ	21
BP	GO:0090218	positive regulation of lipid kinase activity	6/337	36/18903	3.80854e-05	0.000243197	0.000130985	VAV3/TEK/CCL19/CCL21/FLT3/VAV2	6
BP	GO:0051302	regulation of cell division	13/337	190/18903	3.82173e-05	0.000243664	0.000131237	PROK1/TGFA/FGF1/IL1B/IL1A/SSTR5/TGFB2/RXFP3/FGF9/PTN/PGF/FGF8/BIRC5	13
BP	GO:0090277	positive regulation of peptide hormone secretion	9/337	92/18903	3.87351e-05	0.000246588	0.000132812	PPARD/GPER1/NR0B2/FGA/SCT/TFR2/GIPR/TRH/GHRHR	9
BP	GO:0031099	regeneration	13/337	192/18903	4.26093e-05	0.000270836	0.000145872	PPARD/HGF/IGF1/TNF/LGR6/NR0B2/FLT3/APOD/PTN/NR4A3/PGF/IL6/TNC	13
BP	GO:0007409	axonogenesis	21/337	438/18903	4.276e-05	0.000271379	0.000146164	NRP2/CSF1R/LGR6/SEMA6A/CCK/SEMA3E/BMPR1B/BMP7/SEMA6B/SLIT2/NR2E1/SLIT1/MAPT/NR4A2/WNT5A/SEMA6D/ARTN/TUBB3/BDNF/PRKCQ/SEMA3B	21
BP	GO:0002832	negative regulation of response to biotic stimulus	10/337	116/18903	4.35179e-05	0.000275349	0.000148302	HLA-E/HLA-B/HLA-F/HLA-A/HLA-G/A2M/LTF/MICB/TNFAIP3/MMP12	10
BP	GO:0008645	hexose transmembrane transport	10/337	116/18903	4.35179e-05	0.000275349	0.000148302	PPARD/SORT1/IGF1/TNF/IL1B/C3/NR4A3/FGF21/LEP/ADIPOQ	10
BP	GO:0001867	complement activation, lectin pathway	4/337	12/18903	4.38686e-05	0.000275888	0.000148592	A2M/COLEC10/FCN2/MBL2	4
BP	GO:0032966	negative regulation of collagen biosynthetic process	4/337	12/18903	4.38686e-05	0.000275888	0.000148592	PPARD/CIITA/NPPC/IL6	4
BP	GO:0051798	positive regulation of hair follicle development	4/337	12/18903	4.38686e-05	0.000275888	0.000148592	TNF/TGFB2/WNT5A/GAL	4
BP	GO:0061517	macrophage proliferation	4/337	12/18903	4.38686e-05	0.000275888	0.000148592	IL33/CSF1/CSF1R/IL34	4
BP	GO:0034110	regulation of homotypic cell-cell adhesion	6/337	37/18903	4.47802e-05	0.000281195	0.000151451	SYK/PRKCA/CTSG/CCL5/PRKCQ/IL6	6
BP	GO:0060444	branching involved in mammary gland duct morphogenesis	5/337	23/18903	4.51693e-05	0.000283211	0.000152536	CSF1/CCL11/WNT5A/AREG/PGR	5
BP	GO:0002793	positive regulation of peptide secretion	9/337	94/18903	4.59717e-05	0.000286753	0.000154444	PPARD/GPER1/NR0B2/FGA/SCT/TFR2/GIPR/TRH/GHRHR	9
BP	GO:0002067	glandular epithelial cell differentiation	8/337	73/18903	4.60792e-05	0.000286753	0.000154444	RARB/BMP2/BMP6/FGF8/WNT5A/PGR/IL13/IL31RA	8
BP	GO:0046637	regulation of alpha-beta T cell differentiation	8/337	73/18903	4.60792e-05	0.000286753	0.000154444	HLA-DRA/SYK/CCL19/TNFSF18/IL2RG/IL12B/TNFSF4/IL4	8
BP	GO:0061035	regulation of cartilage development	8/337	73/18903	4.60792e-05	0.000286753	0.000154444	RARB/BMP2/BMPR1B/BMP6/BMP1/GDF2/WNT5A/LEP	8
BP	GO:0072678	T cell migration	8/337	73/18903	4.60792e-05	0.000286753	0.000154444	PIK3CG/ITGAL/CCL2/XCL1/CCL21/CCL5/APOD/WNT5A	8
BP	GO:0002279	mast cell activation involved in immune response	7/337	54/18903	4.63842e-05	0.00028822	0.000155234	PIK3CG/BTK/SYK/PTGDR/NR4A3/IL4/IL13	7
BP	GO:0030509	BMP signaling pathway	12/337	167/18903	4.70488e-05	0.000291913	0.000157223	BMP2/BMPR1B/GREM2/BMP7/BMP6/TGFB2/LEFTY1/GDF2/DKK1/WNT5A/TMPRSS6/NODAL	12
BP	GO:0031345	negative regulation of cell projection organization	13/337	194/18903	4.74349e-05	0.00029387	0.000158278	B2M/SEMA6A/SEMA3E/CCL21/SEMA6B/SLIT2/SLIT1/NFATC4/VIM/DKK1/WNT5A/SEMA6D/SEMA3B	13
BP	GO:0043542	endothelial cell migration	16/337	281/18903	4.80117e-05	0.000297001	0.000159964	PIK3CG/MET/EGF/S100A2/TEK/PRKCA/ANGPT1/AGT/NRP2/TNF/FGF1/SLIT2/NR2E1/PTN/GDF2/WNT5A	16
BP	GO:0010977	negative regulation of neuron projection development	11/337	142/18903	4.90473e-05	0.000302956	0.000163171	B2M/SEMA6A/SEMA3E/SEMA6B/SLIT2/SLIT1/VIM/DKK1/WNT5A/SEMA6D/SEMA3B	11
BP	GO:0048662	negative regulation of smooth muscle cell proliferation	8/337	74/18903	5.08736e-05	0.000313771	0.000168996	PPARD/BMP2/GPER1/VIPR2/IL12B/APOD/TNFAIP3/ADIPOQ	8
BP	GO:0033135	regulation of peptidyl-serine phosphorylation	11/337	143/18903	5.23032e-05	0.000319773	0.000172229	HGF/CALCR/ANGPT1/TNF/NTF3/IL11/DKK1/CSF3/WNT5A/BDNF/IL6	11
BP	GO:0055076	transition metal ion homeostasis	11/337	143/18903	5.23032e-05	0.000319773	0.000172229	B2M/SLC40A1/LCN2/LTF/LCK/BMP6/TFR2/GDF2/SLC22A17/SLC11A1/TMPRSS6	11
BP	GO:0002448	mast cell mediated immunity	7/337	55/18903	5.23446e-05	0.000319773	0.000172229	PIK3CG/BTK/SYK/PTGDR/NR4A3/IL4/IL13	7
BP	GO:2000107	negative regulation of leukocyte apoptotic process	7/337	55/18903	5.23446e-05	0.000319773	0.000172229	CD74/KITLG/CCL19/PDCD1/CCL21/CCL5/PRKCQ	7
BP	GO:2000648	positive regulation of stem cell proliferation	7/337	55/18903	5.23446e-05	0.000319773	0.000172229	PTPRC/KITLG/THPO/NR2E1/FGF9/FGF8/WNT5A	7
BP	GO:0042092	type 2 immune response	6/337	38/18903	5.23852e-05	0.000319773	0.000172229	CD74/IL33/XCL1/TNFSF4/IL4/IL6	6
BP	GO:0045742	positive regulation of epidermal growth factor receptor signaling pathway	6/337	38/18903	5.23852e-05	0.000319773	0.000172229	TGFA/EGF/AGT/GPER1/FASLG/AREG	6
BP	GO:0050890	cognition	17/337	314/18903	5.26418e-05	0.000320868	0.000172819	B2M/CX3CR1/HLA-DRA/AGT/TNF/TACR1/CCL11/NTF3/OPRK1/OPRL1/NFATC4/PTN/MAPT/DKK1/PRKCG/BDNF/GALR3	17
BP	GO:0015749	monosaccharide transmembrane transport	10/337	119/18903	5.41524e-05	0.000329592	0.000177517	PPARD/SORT1/IGF1/TNF/IL1B/C3/NR4A3/FGF21/LEP/ADIPOQ	10
BP	GO:0014033	neural crest cell differentiation	9/337	96/18903	5.43181e-05	0.000329635	0.000177541	KITLG/NRG1/NRP2/SEMA6A/SEMA3E/BMP7/SEMA6B/SEMA6D/SEMA3B	9
BP	GO:0046330	positive regulation of JNK cascade	9/337	96/18903	5.43181e-05	0.000329635	0.000177541	CCL19/TLR4/TNF/IL1B/CCL21/FCGR2B/IL1A/TNFRSF19/WNT5A	9
BP	GO:0007596	blood coagulation	14/337	225/18903	5.50227e-05	0.000333425	0.000179582	PIK3CG/CD40LG/SYK/VAV3/PRKCA/CTSG/TLR4/LCK/FGA/VAV2/PLCG2/SERPIND1/PRKCQ/IL6	14
BP	GO:0032890	regulation of organic acid transport	8/337	75/18903	5.60764e-05	0.000338254	0.000182183	FABP3/SYK/AGT/TNF/IL1B/IL1A/TRH/LEP	8
BP	GO:2000242	negative regulation of reproductive process	8/337	75/18903	5.60764e-05	0.000338254	0.000182183	SEMG1/IGF1/ACVR1C/IL1A/BMP7/NPPC/WNT5A/NODAL	8
BP	GO:0001759	organ induction	5/337	24/18903	5.62265e-05	0.000338254	0.000182183	BMP2/FGF1/DKK1/FGF8/WNT5A	5
BP	GO:0002922	positive regulation of humoral immune response	5/337	24/18903	5.62265e-05	0.000338254	0.000182183	PTPRC/TNF/IL1B/FCGR2B/C3	5
BP	GO:2000353	positive regulation of endothelial cell apoptotic process	5/337	24/18903	5.62265e-05	0.000338254	0.000182183	HLA-G/CD40LG/CCL2/GPER1/FASLG	5
BP	GO:0043370	regulation of CD4-positive, alpha-beta T cell differentiation	7/337	56/18903	5.89178e-05	0.000353606	0.000190451	HLA-DRA/CCL19/TNFSF18/IL2RG/IL12B/TNFSF4/IL4	7
BP	GO:0001657	ureteric bud development	9/337	97/18903	5.89486e-05	0.000353606	0.000190451	RARB/SDC4/AGT/BMP2/FGF1/CRLF1/BMP7/SLIT2/FGF8	9
BP	GO:0002385	mucosal immune response	6/337	39/18903	6.09888e-05	0.000365318	0.000196759	LTF/DEFB1/XCL1/IL4/RNASE2/DEFA4	6
BP	GO:0072001	renal system development	17/337	318/18903	6.15682e-05	0.000368074	0.000198243	RARB/SDC4/TEK/ANGPT1/AGT/BMP2/FGF1/CRLF1/BMP7/BMP6/TGFB2/SLIT2/FGF8/WNT5A/LGR5/AGTR1/ADIPOQ	17
BP	GO:0009746	response to hexose	13/337	199/18903	6.16342e-05	0.000368074	0.000198243	PPARD/TNF/ACVR1C/CMA1/GPER1/NR0B2/PCSK1/OPRK1/NOX4/GIPR/FGF21/GHRHR/ADIPOQ	13
BP	GO:0021536	diencephalon development	8/337	76/18903	6.17145e-05	0.000368074	0.000198243	NRP2/BMP2/SEMA3E/PCSK1/NR4A2/FGF8/WNT5A/GHRHR	8
BP	GO:0002524	hypersensitivity	4/337	13/18903	6.24766e-05	0.000371022	0.000199831	HLA-E/BTK/FCGR2B/C3	4
BP	GO:0002863	positive regulation of inflammatory response to antigenic stimulus	4/337	13/18903	6.24766e-05	0.000371022	0.000199831	HLA-E/BTK/TNF/C3	4
BP	GO:0010713	negative regulation of collagen metabolic process	4/337	13/18903	6.24766e-05	0.000371022	0.000199831	PPARD/CIITA/NPPC/IL6	4
BP	GO:0072163	mesonephric epithelium development	9/337	98/18903	6.39073e-05	0.000378437	0.000203825	RARB/SDC4/AGT/BMP2/FGF1/CRLF1/BMP7/SLIT2/FGF8	9
BP	GO:0072164	mesonephric tubule development	9/337	98/18903	6.39073e-05	0.000378437	0.000203825	RARB/SDC4/AGT/BMP2/FGF1/CRLF1/BMP7/SLIT2/FGF8	9
BP	GO:0048675	axon extension	10/337	122/18903	6.69247e-05	0.000395741	0.000213145	NRP2/SEMA6A/SEMA3E/SEMA6B/SLIT2/SLIT1/MAPT/WNT5A/SEMA6D/SEMA3B	10
BP	GO:0035296	regulation of tube diameter	11/337	147/18903	6.7253e-05	0.000395992	0.00021328	PPARD/CYSLTR1/AGT/TNF/TACR1/GPER1/FGA/NPPC/UTS2/AGTR1/LEP	11
BP	GO:0097746	blood vessel diameter maintenance	11/337	147/18903	6.7253e-05	0.000395992	0.00021328	PPARD/CYSLTR1/AGT/TNF/TACR1/GPER1/FGA/NPPC/UTS2/AGTR1/LEP	11
BP	GO:1903038	negative regulation of leukocyte cell-cell adhesion	11/337	147/18903	6.7253e-05	0.000395992	0.00021328	CD74/HLA-G/SDC4/TNFSF18/CTSG/XCL1/CCL21/FCGR2B/TNFSF4/SFTPD/IL4	11
BP	GO:0010827	regulation of glucose transmembrane transport	8/337	77/18903	6.78161e-05	0.00039818	0.000214459	IGF1/TNF/IL1B/C3/NR4A3/FGF21/LEP/ADIPOQ	8
BP	GO:0045824	negative regulation of innate immune response	8/337	77/18903	6.78161e-05	0.00039818	0.000214459	HLA-E/HLA-B/HLA-F/HLA-A/HLA-G/A2M/TNFAIP3/MMP12	8
BP	GO:2001237	negative regulation of extrinsic apoptotic signaling pathway	9/337	99/18903	6.92126e-05	0.000404384	0.0002178	HGF/IGF1/TNF/IL1B/IL7/FGA/IL1A/TNFAIP3/IL4	9
BP	GO:0003081	regulation of systemic arterial blood pressure by renin-angiotensin	5/337	25/18903	6.92619e-05	0.000404384	0.0002178	AGT/CTSG/TACR1/CMA1/AGTR1	5
BP	GO:0043302	positive regulation of leukocyte degranulation	5/337	25/18903	6.92619e-05	0.000404384	0.0002178	HLA-F/SYK/PTAFR/IL4/IL13	5
BP	GO:0045649	regulation of macrophage differentiation	5/337	25/18903	6.92619e-05	0.000404384	0.0002178	PRKCA/CSF1/INHA/IL34/ADIPOQ	5
BP	GO:1901186	positive regulation of ERBB signaling pathway	6/337	40/18903	7.06845e-05	0.000412111	0.000221962	TGFA/EGF/AGT/GPER1/FASLG/AREG	6
BP	GO:0035150	regulation of tube size	11/337	148/18903	7.15167e-05	0.000416379	0.000224261	PPARD/CYSLTR1/AGT/TNF/TACR1/GPER1/FGA/NPPC/UTS2/AGTR1/LEP	11
BP	GO:0007599	hemostasis	14/337	231/18903	7.30726e-05	0.000424843	0.000228819	PIK3CG/CD40LG/SYK/VAV3/PRKCA/CTSG/TLR4/LCK/FGA/VAV2/PLCG2/SERPIND1/PRKCQ/IL6	14
BP	GO:0006826	iron ion transport	7/337	58/18903	7.40933e-05	0.000430176	0.000231691	B2M/SLC40A1/LCN2/LTF/TFR2/SLC22A17/SLC11A1	7
BP	GO:0001776	leukocyte homeostasis	9/337	100/18903	7.48836e-05	0.000433553	0.00023351	CD74/BTK/KITLG/SLC40A1/CSF1/FLT3/TNFAIP3/TNFSF13B/IL6	9
BP	GO:0002532	production of molecular mediator involved in inflammatory response	9/337	100/18903	7.48836e-05	0.000433553	0.00023351	BTK/SYK/TLR4/TNF/APOD/IL17D/IL1R2/IL6/LEP	9
BP	GO:0000302	response to reactive oxygen species	13/337	204/18903	7.93895e-05	0.000459002	0.000247217	HGF/MET/BTK/TACR1/IL1A/BMP7/APOD/TNFAIP3/MAPT/NR4A3/AREG/MPO/IL6	13
BP	GO:2001234	negative regulation of apoptotic signaling pathway	14/337	233/18903	8.01403e-05	0.000462699	0.000249208	HGF/CX3CR1/CD74/IGF1/TNF/IL1B/IL7/FGA/IL1A/TNFAIP3/NR4A2/IL4/EPO/BDNF	14
BP	GO:0015908	fatty acid transport	9/337	101/18903	8.09403e-05	0.00046667	0.000251347	FABP3/PPARD/FABP2/SYK/RBP5/IL1B/IL1A/FABP6/FABP4	9
BP	GO:0042119	neutrophil activation	6/337	41/18903	8.15708e-05	0.000469654	0.000252954	SYK/CTSG/TNF/PTAFR/CCL5/FCGR2B	6
BP	GO:0051222	positive regulation of protein transport	16/337	294/18903	8.19712e-05	0.000471306	0.000253844	PPARD/TLR4/IGF1/TNF/IL1B/GPER1/NR0B2/PCSK1/FGA/IL1A/BMP6/TGFB2/GIPR/TRH/IL13/LEP	16
BP	GO:0043903	regulation of biological process involved in symbiotic interaction	7/337	59/18903	8.2797e-05	0.000475397	0.000256047	CD74/TRIM22/CIITA/LTF/CD4/PTX3/SFTPD	7
BP	GO:0002433	immune response-regulating cell surface receptor signaling pathway involved in phagocytosis	5/337	26/18903	8.45072e-05	0.00048388	0.000260616	PTPRC/SYK/VAV3/FCGR2B/VAV2	5
BP	GO:0038096	Fc-gamma receptor signaling pathway involved in phagocytosis	5/337	26/18903	8.45072e-05	0.00048388	0.000260616	PTPRC/SYK/VAV3/FCGR2B/VAV2	5
BP	GO:1903531	negative regulation of secretion by cell	11/337	151/18903	8.57253e-05	0.000489757	0.000263781	HLA-F/ACVR1C/IL1B/IL12B/FCGR2B/OPRK1/IL11/TRH/INHA/LEP/ADIPOQ	11
BP	GO:0032736	positive regulation of interleukin-13 production	4/337	14/18903	8.62405e-05	0.000489757	0.000263781	HLA-E/IL33/TNFSF4/IL4	4
BP	GO:0035630	bone mineralization involved in bone maturation	4/337	14/18903	8.62405e-05	0.000489757	0.000263781	IGF1/LTF/BMP2/LEP	4
BP	GO:0043950	positive regulation of cAMP-mediated signaling	4/337	14/18903	8.62405e-05	0.000489757	0.000263781	SCTR/SCT/ADCYAP1R1/GIPR	4
BP	GO:0045059	positive thymic T cell selection	4/337	14/18903	8.62405e-05	0.000489757	0.000263781	CD74/PTPRC/CD3E/CD3G	4
BP	GO:0060732	positive regulation of inositol phosphate biosynthetic process	4/337	14/18903	8.62405e-05	0.000489757	0.000263781	CD244/PTAFR/GPER1/ADCYAP1R1	4
BP	GO:0071772	response to BMP	12/337	178/18903	8.71845e-05	0.000493662	0.000265885	BMP2/BMPR1B/GREM2/BMP7/BMP6/TGFB2/LEFTY1/GDF2/DKK1/WNT5A/TMPRSS6/NODAL	12
BP	GO:0071773	cellular response to BMP stimulus	12/337	178/18903	8.71845e-05	0.000493662	0.000265885	BMP2/BMPR1B/GREM2/BMP7/BMP6/TGFB2/LEFTY1/GDF2/DKK1/WNT5A/TMPRSS6/NODAL	12
BP	GO:0001823	mesonephros development	9/337	102/18903	8.74032e-05	0.000493662	0.000265885	RARB/SDC4/AGT/BMP2/FGF1/CRLF1/BMP7/SLIT2/FGF8	9
BP	GO:0019218	regulation of steroid metabolic process	9/337	102/18903	8.74032e-05	0.000493662	0.000265885	RORC/TNF/BMP2/FGF1/IL1A/BMP6/RORA/GAL/LEP	9
BP	GO:2000241	regulation of reproductive process	13/337	206/18903	8.76444e-05	0.000494352	0.000266257	SEMG1/IGF1/PTAFR/ACVR1C/TACR1/DEFB1/IL1A/BMP7/FGF9/NPPC/WNT5A/NODAL/UMODL1	13
BP	GO:0070227	lymphocyte apoptotic process	8/337	80/18903	8.92021e-05	0.000502457	0.000270622	CD74/BTK/PDCD1/FASLG/CCL5/CD3G/WNT5A/PRKCQ	8
BP	GO:1901343	negative regulation of vasculature development	11/337	152/18903	9.09685e-05	0.000511713	0.000275607	HLA-G/TEK/AGT/TNF/SEMA6A/SEMA3E/FASLG/TGFB2/GDF2/ANGPTL7/PRL	11
BP	GO:0014002	astrocyte development	6/337	42/18903	9.37516e-05	0.000525945	0.000283272	TLR4/TNF/IL1B/VIM/MAPT/IL6	6
BP	GO:0050691	regulation of defense response to virus by host	6/337	42/18903	9.37516e-05	0.000525945	0.000283272	MICB/IL1B/IL12B/TNFAIP3/MMP12/IL4	6
BP	GO:0019233	sensory perception of pain	9/337	103/18903	9.42938e-05	0.000528274	0.000284527	IL33/CCL2/TNF/PTAFR/TACR1/IL12B/IL1A/OPRK1/OPRL1	9
BP	GO:0050868	negative regulation of T cell activation	10/337	128/18903	0.000100271	0.000561006	0.000302156	CD74/HLA-G/SDC4/TNFSF18/CTSG/XCL1/FCGR2B/TNFSF4/SFTPD/IL4	10
BP	GO:0002092	positive regulation of receptor internalization	5/337	27/18903	0.000102208	0.000568778	0.000306342	EGF/SYK/ANGPT1/NTF3/PLCG2	5
BP	GO:0002710	negative regulation of T cell mediated immunity	5/337	27/18903	0.000102208	0.000568778	0.000306342	HLA-F/PTPRC/HLA-G/XCL1/FCGR2B	5
BP	GO:0048520	positive regulation of behavior	5/337	27/18903	0.000102208	0.000568778	0.000306342	NPY/OPRK1/AGRP/NR4A3/GHRHR	5
BP	GO:0060259	regulation of feeding behavior	5/337	27/18903	0.000102208	0.000568778	0.000306342	NPY/MC4R/OPRK1/AGRP/NR4A3	5
BP	GO:0034113	heterotypic cell-cell adhesion	7/337	61/18903	0.000102708	0.0005708	0.000307431	PTPRC/TNF/IL1B/LCK/FGA/BMP7/ADIPOQ	7
BP	GO:0046209	nitric oxide metabolic process	8/337	82/18903	0.00010635	0.000589464	0.000317483	CX3CR1/AGT/NPY/TLR4/TNF/IL1B/RORA/PTX3	8
BP	GO:0048708	astrocyte differentiation	8/337	82/18903	0.00010635	0.000589464	0.000317483	TLR4/TNF/BMP2/IL1B/NR2E1/VIM/MAPT/IL6	8
BP	GO:2000027	regulation of animal organ morphogenesis	10/337	129/18903	0.000107009	0.000592323	0.000319023	HGF/AGT/CSF1/TNF/BMP2/FGF1/BMP7/DKK1/FGF8/WNT5A	10
BP	GO:0045622	regulation of T-helper cell differentiation	6/337	43/18903	0.000107336	0.000592556	0.000319149	HLA-DRA/CCL19/TNFSF18/IL12B/TNFSF4/IL4	6
BP	GO:1904037	positive regulation of epithelial cell apoptotic process	6/337	43/18903	0.000107336	0.000592556	0.000319149	HLA-G/CD40LG/CCL2/GPER1/FASLG/IL6	6
BP	GO:0007200	phospholipase C-activating G protein-coupled receptor signaling pathway	9/337	105/18903	0.000109448	0.000603414	0.000324997	CX3CR1/AGT/GPR32/TACR1/FPR1/OPRK1/LTB4R/OPRL1/AGTR1	9
BP	GO:0032535	regulation of cellular component size	18/337	367/18903	0.000113112	0.000622792	0.000335434	VAV3/SEMA6A/SEMA3E/SCTR/CCL11/CCL21/SCT/VAV2/SEMA6B/SLIT2/SLIT1/MAPT/CSF3/WNT5A/SEMA6D/BDNF/SEMA3B/ELN	18
BP	GO:0046888	negative regulation of hormone secretion	7/337	62/18903	0.000114032	0.000626197	0.000337268	ACVR1C/IL1B/OPRK1/IL11/INHA/LEP/ADIPOQ	7
BP	GO:0070228	regulation of lymphocyte apoptotic process	7/337	62/18903	0.000114032	0.000626197	0.000337268	CD74/BTK/PDCD1/CCL5/CD3G/WNT5A/PRKCQ	7
BP	GO:0050848	regulation of calcium-mediated signaling	8/337	83/18903	0.000115896	0.000632564	0.000340697	SYK/NRG1/IGF1/TNF/CD4/CD3E/PLCG2/MAPT	8
BP	GO:2001057	reactive nitrogen species metabolic process	8/337	83/18903	0.000115896	0.000632564	0.000340697	CX3CR1/AGT/NPY/TLR4/TNF/IL1B/RORA/PTX3	8
BP	GO:0032725	positive regulation of granulocyte macrophage colony-stimulating factor production	4/337	15/18903	0.000115952	0.000632564	0.000340697	SYK/IL1B/IL12B/IL17D	4
BP	GO:1902563	regulation of neutrophil activation	4/337	15/18903	0.000115952	0.000632564	0.000340697	SYK/TNF/PTAFR/FCGR2B	4
BP	GO:2000345	regulation of hepatocyte proliferation	4/337	15/18903	0.000115952	0.000632564	0.000340697	TNF/FGF1/TNFAIP3/PTN	4
BP	GO:0051607	defense response to virus	16/337	304/18903	0.000120944	0.000658928	0.000354897	IL33/PTPRC/TRIM22/TLR7/MICB/IL1B/DMBT1/IL12B/OPRK1/TNFAIP3/MMP12/AZU1/IL4/RNASE2/IL6/MBL2	16
BP	GO:0010595	positive regulation of endothelial cell migration	10/337	131/18903	0.000121638	0.000659424	0.000355164	PIK3CG/MET/EGF/TEK/PRKCA/ANGPT1/AGT/NRP2/FGF1/WNT5A	10
BP	GO:1904407	positive regulation of nitric oxide metabolic process	6/337	44/18903	0.000122438	0.000659424	0.000355164	AGT/NPY/TLR4/TNF/IL1B/PTX3	6
BP	GO:1905521	regulation of macrophage migration	6/337	44/18903	0.000122438	0.000659424	0.000355164	CX3CR1/TNFSF18/CSF1/CSF1R/CCL5/IL34	6
BP	GO:0007611	learning or memory	15/337	273/18903	0.000122547	0.000659424	0.000355164	B2M/CX3CR1/AGT/TACR1/CCL11/NTF3/OPRK1/OPRL1/NFATC4/PTN/MAPT/DKK1/PRKCG/BDNF/GALR3	15
BP	GO:0002227	innate immune response in mucosa	5/337	28/18903	0.000122621	0.000659424	0.000355164	LTF/DEFB1/IL4/RNASE2/DEFA4	5
BP	GO:0010758	regulation of macrophage chemotaxis	5/337	28/18903	0.000122621	0.000659424	0.000355164	TNFSF18/CSF1/CSF1R/CCL5/IL34	5
BP	GO:0010818	T cell chemotaxis	5/337	28/18903	0.000122621	0.000659424	0.000355164	PIK3CG/XCL1/CCL21/CCL5/WNT5A	5
BP	GO:0031664	regulation of lipopolysaccharide-mediated signaling pathway	5/337	28/18903	0.000122621	0.000659424	0.000355164	PRKCA/LTF/CD14/BMP6/TNFAIP3	5
BP	GO:0032958	inositol phosphate biosynthetic process	5/337	28/18903	0.000122621	0.000659424	0.000355164	CD244/PTAFR/GPER1/ADCYAP1R1/PLCG2	5
BP	GO:0071624	positive regulation of granulocyte chemotaxis	5/337	28/18903	0.000122621	0.000659424	0.000355164	CD74/CCL19/XCL1/CCL21/IL4	5
BP	GO:0140546	defense response to symbiont	16/337	305/18903	0.000125612	0.00067464	0.000363359	IL33/PTPRC/TRIM22/TLR7/MICB/IL1B/DMBT1/IL12B/OPRK1/TNFAIP3/MMP12/AZU1/IL4/RNASE2/IL6/MBL2	16
BP	GO:0010573	vascular endothelial growth factor production	7/337	63/18903	0.000126349	0.000676848	0.000364548	TNF/IL1B/C3/IL1A/RORA/NODAL/IL6	7
BP	GO:0032731	positive regulation of interleukin-1 beta production	7/337	63/18903	0.000126349	0.000676848	0.000364548	CCL19/TLR4/TNF/ORM1/WNT5A/AZU1/IL6	7
BP	GO:0032963	collagen metabolic process	9/337	107/18903	0.00012659	0.000677264	0.000364772	PPARD/CIITA/CTSS/NPPC/VIM/PRTN3/MMP12/TMPRSS6/IL6	9
BP	GO:0061448	connective tissue development	15/337	274/18903	0.00012759	0.000681738	0.000367182	PPARD/RARB/RORC/CSF1/BMP2/BMPR1B/BMP7/BMP6/BMP1/FGF9/GDF2/NPPC/WNT5A/LEP/UMODL1	15
BP	GO:0034219	carbohydrate transmembrane transport	10/337	132/18903	0.000129564	0.000691395	0.000372383	PPARD/SORT1/IGF1/TNF/IL1B/C3/NR4A3/FGF21/LEP/ADIPOQ	10
BP	GO:0071375	cellular response to peptide hormone stimulus	16/337	306/18903	0.000130438	0.000695168	0.000374415	CYSLTR2/AGT/IL1B/GPER1/NR4A2/NR4A3/TSHR/FGF21/PRKCQ/AGTR1/GHRHR/LEP/ADIPOQ/UMODL1/GCGR/GLP2R	16
BP	GO:0010720	positive regulation of cell development	16/337	307/18903	0.000135425	0.000719899	0.000387736	CX3CR1/IL33/TNF/BMP2/IL1B/GPER1/FGA/SLIT2/NR2E1/PTN/MAPT/RAC3/BDNF/IL6/IL34/ADIPOQ	16
BP	GO:0044403	biological process involved in symbiotic interaction	16/337	307/18903	0.000135425	0.000719899	0.000387736	CX3CR1/CD74/TRIM22/CIITA/CCR5/CTSG/LTF/CR2/CSF1R/CD4/CCL5/PTX3/SFTPD/AZU1/AGTR1/MBL2	16
BP	GO:0033138	positive regulation of peptidyl-serine phosphorylation	9/337	108/18903	0.000135969	0.000720947	0.0003883	CALCR/ANGPT1/TNF/NTF3/IL11/CSF3/WNT5A/BDNF/IL6	9
BP	GO:0061387	regulation of extent of cell growth	9/337	108/18903	0.000135969	0.000720947	0.0003883	SEMA6A/SEMA3E/SEMA6B/SLIT1/MAPT/WNT5A/SEMA6D/BDNF/SEMA3B	9
BP	GO:1901617	organic hydroxy compound biosynthetic process	14/337	245/18903	0.000136391	0.000722266	0.00038901	TNF/CD244/PTAFR/BMP2/FGF1/GPER1/BMP6/TGFB2/ADCYAP1R1/PLCG2/NR4A2/WNT5A/PLTP/LEP	14
BP	GO:0008625	extrinsic apoptotic signaling pathway via death domain receptors	8/337	85/18903	0.000137116	0.000725179	0.000390579	HGF/SORT1/TNFRSF10C/TNF/BMPR1B/FASLG/FGA/TNFAIP3	8
BP	GO:0030501	positive regulation of bone mineralization	6/337	45/18903	0.000139176	0.000734518	0.000395609	LTF/BMP2/BMPR1B/BMP7/BMP6/PTN	6
BP	GO:0048469	cell maturation	12/337	187/18903	0.000139235	0.000734518	0.000395609	SEMG1/BTK/CCL19/DEFB1/CCL21/C3/NPPC/NR4A2/RAC3/PGR/EPO/GHRHR	12
BP	GO:0001822	kidney development	16/337	309/18903	0.0001459	0.000768347	0.000413829	RARB/SDC4/TEK/ANGPT1/AGT/BMP2/FGF1/CRLF1/BMP7/BMP6/TGFB2/SLIT2/FGF8/WNT5A/AGTR1/ADIPOQ	16
BP	GO:0043949	regulation of cAMP-mediated signaling	5/337	29/18903	0.000146017	0.000768347	0.000413829	SCTR/SCT/ADCYAP1R1/OPRL1/GIPR	5
BP	GO:0033077	T cell differentiation in thymus	8/337	86/18903	0.00014887	0.000782368	0.000421381	B2M/CD74/PTPRC/IL2RG/IL1B/CD3E/IL1A/CD3G	8
BP	GO:1904951	positive regulation of establishment of protein localization	16/337	310/18903	0.000151398	0.000794647	0.000427995	PPARD/TLR4/IGF1/TNF/IL1B/GPER1/NR0B2/PCSK1/FGA/IL1A/BMP6/TGFB2/GIPR/TRH/IL13/LEP	16
BP	GO:0010820	positive regulation of T cell chemotaxis	4/337	16/18903	0.000152437	0.000796083	0.000428768	XCL1/CCL21/CCL5/WNT5A	4
BP	GO:0010919	regulation of inositol phosphate biosynthetic process	4/337	16/18903	0.000152437	0.000796083	0.000428768	CD244/PTAFR/GPER1/ADCYAP1R1	4
BP	GO:0034374	low-density lipoprotein particle remodeling	4/337	16/18903	0.000152437	0.000796083	0.000428768	CETP/AGT/MPO/AGTR1	4
BP	GO:2000846	regulation of corticosteroid hormone secretion	4/337	16/18903	0.000152437	0.000796083	0.000428768	AGT/BMP6/GAL/AGTR1	4
BP	GO:0031100	animal organ regeneration	7/337	65/18903	0.000154225	0.000801393	0.000431628	HGF/TNF/NR0B2/FLT3/NR4A3/PGF/IL6	7
BP	GO:0050771	negative regulation of axonogenesis	7/337	65/18903	0.000154225	0.000801393	0.000431628	SEMA6A/SEMA3E/SEMA6B/SLIT1/WNT5A/SEMA6D/SEMA3B	7
BP	GO:0080164	regulation of nitric oxide metabolic process	7/337	65/18903	0.000154225	0.000801393	0.000431628	CX3CR1/AGT/NPY/TLR4/TNF/IL1B/PTX3	7
BP	GO:1905330	regulation of morphogenesis of an epithelium	7/337	65/18903	0.000154225	0.000801393	0.000431628	HGF/EGF/AGT/TNF/FGF1/BMP7/WNT5A	7
BP	GO:0048863	stem cell differentiation	14/337	248/18903	0.000154904	0.000803912	0.000432985	PTPRC/A2M/KITLG/NRG1/NRP2/SEMA6A/SEMA3E/BMP7/TGFB2/SEMA6B/PTN/SHC4/SEMA6D/SEMA3B	14
BP	GO:0060443	mammary gland morphogenesis	6/337	46/18903	0.000157677	0.000817286	0.000440188	CSF1/CSF1R/CCL11/WNT5A/AREG/PGR	6
BP	GO:0010975	regulation of neuron projection development	20/337	446/18903	0.000160436	0.000830553	0.000447333	B2M/HGF/AGT/SEMA6A/SEMA3E/BMP7/SEMA6B/SLIT2/NR2E1/SLIT1/NFATC4/PTN/VIM/MAPT/DKK1/WNT5A/SEMA6D/EPO/BDNF/SEMA3B	20
BP	GO:0050672	negative regulation of lymphocyte proliferation	8/337	87/18903	0.000161442	0.000834719	0.000449577	HLA-G/INPP5D/BTK/SDC4/XCL1/FCGR2B/SFTPD/GAL	8
BP	GO:0070588	calcium ion transmembrane transport	17/337	345/18903	0.000165183	0.000853001	0.000459424	PIK3CG/PTPRC/XCR1/CALCR/CCR5/CCL19/GPER1/XCL1/FASLG/LCK/CCL21/HSPA2/ADCYAP1R1/OPRL1/PLCG2/EPO/IL13	17
BP	GO:1901222	regulation of NIK/NF-kappaB signaling	9/337	111/18903	0.000167657	0.000864703	0.000465726	CCL19/TLR4/TLR7/TNF/IL1B/CD14/IL12B/BMP7/IL18R1	9
BP	GO:0018105	peptidyl-serine phosphorylation	16/337	313/18903	0.00016899	0.000870495	0.000468846	HGF/CALCR/SYK/PRKCA/ANGPT1/TNF/NTF3/IL11/DKK1/CSF3/WNT5A/PRKCG/EPO/BDNF/PRKCQ/IL6	16
BP	GO:0034368	protein-lipid complex remodeling	5/337	30/18903	0.00017268	0.00088621	0.00047731	CETP/AGT/MPO/AGTR1/PLTP	5
BP	GO:0034369	plasma lipoprotein particle remodeling	5/337	30/18903	0.00017268	0.00088621	0.00047731	CETP/AGT/MPO/AGTR1/PLTP	5
BP	GO:0090330	regulation of platelet aggregation	5/337	30/18903	0.00017268	0.00088621	0.00047731	SYK/PRKCA/CTSG/PRKCQ/IL6	5
BP	GO:0002312	B cell activation involved in immune response	8/337	88/18903	0.000174875	0.000894164	0.000481594	PTPRC/CD40LG/TLR4/FCGR2B/TNFSF4/PLCG2/IL4/IL6	8
BP	GO:0032945	negative regulation of mononuclear cell proliferation	8/337	88/18903	0.000174875	0.000894164	0.000481594	HLA-G/INPP5D/BTK/SDC4/XCL1/FCGR2B/SFTPD/GAL	8
BP	GO:0033627	cell adhesion mediated by integrin	8/337	88/18903	0.000174875	0.000894164	0.000481594	PIK3CG/ITGAL/SYK/CD3E/CCL21/CCL5/TGFB2/RAC3	8
BP	GO:0036230	granulocyte activation	6/337	47/18903	0.00017807	0.000908264	0.000489188	SYK/CTSG/TNF/PTAFR/CCL5/FCGR2B	6
BP	GO:1902622	regulation of neutrophil migration	6/337	47/18903	0.00017807	0.000908264	0.000489188	CD74/CCL19/XCL1/CCL21/IL1A/SLIT2	6
BP	GO:0030856	regulation of epithelial cell differentiation	11/337	164/18903	0.0001786	0.000909854	0.000490045	REG3G/PRLR/TNF/BMP2/IL1B/IL1A/BMP7/BMP6/GDF2/NODAL/IL13	11
BP	GO:1903829	positive regulation of protein localization	20/337	451/18903	0.000185907	0.00094592	0.000509469	PPARD/EGF/TLR4/IGF1/CD247/TNF/IL1B/GPER1/NR0B2/PCSK1/FGA/IL1A/BMP6/TGFB2/MAPT/WNT5A/GIPR/TRH/IL13/LEP	20
BP	GO:0006874	cellular calcium ion homeostasis	15/337	284/18903	0.000188826	0.000959597	0.000516836	PTPRC/XCR1/CCR5/CCL7/CCL19/GPER1/CCL11/XCL1/FASLG/LCK/CCL21/CCL5/PLCG2/WNT5A/IL13	15
BP	GO:2000146	negative regulation of cell motility	18/337	383/18903	0.000192006	0.000974567	0.000524899	PPARD/CX3CR1/CD74/IL33/SEMG1/CCL2/NRG1/TNF/ACVR1C/SLURP1/CCL21/APOD/SLIT2/GDF2/SEMA6D/IL4/NODAL/ADIPOQ	18
BP	GO:0009749	response to glucose	12/337	194/18903	0.000196323	0.000992781	0.000534709	PPARD/ACVR1C/CMA1/GPER1/NR0B2/PCSK1/OPRK1/NOX4/GIPR/FGF21/GHRHR/ADIPOQ	12
BP	GO:0008228	opsonization	4/337	17/18903	0.00019655	0.000992781	0.000534709	COLEC10/FCN2/PTX3/MBL2	4
BP	GO:0010819	regulation of T cell chemotaxis	4/337	17/18903	0.00019655	0.000992781	0.000534709	XCL1/CCL21/CCL5/WNT5A	4
BP	GO:0036005	response to macrophage colony-stimulating factor	4/337	17/18903	0.00019655	0.000992781	0.000534709	TLR4/CSF1/TNF/CSF1R	4
BP	GO:0007586	digestion	10/337	139/18903	0.000198224	0.00100002	0.000538607	FABP2/TLR4/TACR1/CCK/OPRK1/SCT/OPRL1/ADM2/UCN2/LEP	10
BP	GO:0032620	interleukin-17 production	6/337	48/18903	0.000200489	0.00100778	0.000542787	BTK/TLR4/IL12B/TNFSF4/PRKCQ/IL6	6
BP	GO:0032660	regulation of interleukin-17 production	6/337	48/18903	0.000200489	0.00100778	0.000542787	BTK/TLR4/IL12B/TNFSF4/PRKCQ/IL6	6
BP	GO:0045776	negative regulation of blood pressure	6/337	48/18903	0.000200489	0.00100778	0.000542787	NPY/TNF/PTAFR/OPRL1/ADM2/ADIPOQ	6
BP	GO:0032148	activation of protein kinase B activity	5/337	31/18903	0.000202903	0.00101745	0.000547997	NRG1/IGF1/FGF1/NTF3/WNT5A	5
BP	GO:0034694	response to prostaglandin	5/337	31/18903	0.000202903	0.00101745	0.000547997	A2M/PTGDR/CCL19/CCL21/TNFSF4	5
BP	GO:0060191	regulation of lipase activity	8/337	90/18903	0.000204504	0.00102424	0.000551655	SORT1/ITK/AGT/PTAFR/CCL5/ADCYAP1R1/ANGPTL4/AGTR1	8
BP	GO:0045670	regulation of osteoclast differentiation	7/337	68/18903	0.000205188	0.00102563	0.000552403	INPP5D/TLR4/CSF1/LTF/TNF/IL12B/IL4	7
BP	GO:0044344	cellular response to fibroblast growth factor stimulus	9/337	114/18903	0.000205275	0.00102563	0.000552403	CCL2/FGF1/CCL5/FGF9/FGF12/FGF8/WNT5A/FGF17/FGF21	9
BP	GO:0001558	regulation of cell growth	19/337	422/18903	0.000221649	0.00110612	0.000595751	PPARD/AGT/IGF1/SEMA6A/SEMA3E/TGFB2/SEMA6B/SLIT2/SLIT1/GDF2/MAPT/OSGIN1/WNT5A/SEMA6D/BDNF/PRKCQ/AGTR1/SEMA3B/TNC	19
BP	GO:0014015	positive regulation of gliogenesis	7/337	69/18903	0.000224912	0.00111652	0.000601353	IL33/TNF/BMP2/IL1B/PTN/IL6/IL34	7
BP	GO:0061180	mammary gland epithelium development	7/337	69/18903	0.000224912	0.00111652	0.000601353	PRLR/CSF1/CSF1R/CCL11/WNT5A/AREG/PGR	7
BP	GO:2000401	regulation of lymphocyte migration	7/337	69/18903	0.000224912	0.00111652	0.000601353	CCL2/CCL7/XCL1/CCL21/CCL5/APOD/WNT5A	7
BP	GO:0043114	regulation of vascular permeability	6/337	49/18903	0.000225076	0.00111652	0.000601353	TEK/ANGPT1/TACR1/BMP6/SLIT2/AZU1	6
BP	GO:0043300	regulation of leukocyte degranulation	6/337	49/18903	0.000225076	0.00111652	0.000601353	HLA-F/SYK/PTAFR/FCGR2B/IL4/IL13	6
BP	GO:0046916	cellular transition metal ion homeostasis	9/337	116/18903	0.000234057	0.0011583	0.000623859	SLC40A1/LCN2/LCK/BMP6/TFR2/GDF2/SLC22A17/SLC11A1/TMPRSS6	9
BP	GO:0051702	biological process involved in interaction with symbiont	9/337	116/18903	0.000234057	0.0011583	0.000623859	CX3CR1/CTSG/LTF/CSF1R/CCL5/PTX3/SFTPD/AZU1/MBL2	9
BP	GO:0007435	salivary gland morphogenesis	5/337	32/18903	0.000236994	0.00116866	0.000629438	HGF/TNF/BMP7/TGFB2/FGF8	5
BP	GO:0010743	regulation of macrophage derived foam cell differentiation	5/337	32/18903	0.000236994	0.00116866	0.000629438	CETP/AGT/CSF1/AGTR1/ADIPOQ	5
BP	GO:0034367	protein-containing complex remodeling	5/337	32/18903	0.000236994	0.00116866	0.000629438	CETP/AGT/MPO/AGTR1/PLTP	5
BP	GO:0072091	regulation of stem cell proliferation	8/337	92/18903	0.000238133	0.00117289	0.000631715	RARB/PTPRC/KITLG/THPO/NR2E1/FGF9/FGF8/WNT5A	8
BP	GO:0072503	cellular divalent inorganic cation homeostasis	16/337	323/18903	0.000241128	0.00118623	0.000638902	PTPRC/XCR1/CCR5/CCL7/CCL19/GPER1/CCL11/XCL1/FASLG/LCK/CCL21/CCL5/PLCG2/WNT5A/SLC11A1/IL13	16
BP	GO:0032604	granulocyte macrophage colony-stimulating factor production	4/337	18/18903	0.000249171	0.00122147	0.000657879	SYK/IL1B/IL12B/IL17D	4
BP	GO:0032645	regulation of granulocyte macrophage colony-stimulating factor production	4/337	18/18903	0.000249171	0.00122147	0.000657879	SYK/IL1B/IL12B/IL17D	4
BP	GO:0038128	ERBB2 signaling pathway	4/337	18/18903	0.000249171	0.00122147	0.000657879	TGFA/EGF/NRG1/AREG	4
BP	GO:0048588	developmental cell growth	13/337	229/18903	0.00025057	0.00122688	0.000660794	AGT/IGF1/NRP2/SEMA6A/SEMA3E/SEMA6B/SLIT2/SLIT1/MAPT/WNT5A/SEMA6D/BDNF/SEMA3B	13
BP	GO:0030516	regulation of axon extension	8/337	93/18903	0.000256572	0.00125331	0.00067503	SEMA6A/SEMA3E/SEMA6B/SLIT1/MAPT/WNT5A/SEMA6D/SEMA3B	8
BP	GO:0044070	regulation of anion transport	8/337	93/18903	0.000256572	0.00125331	0.00067503	SYK/AGT/TNF/PTAFR/IL1B/IL1A/TRH/LEP	8
BP	GO:0043393	regulation of protein binding	12/337	200/18903	0.000260107	0.00126909	0.000683529	SLPI/B2M/ANGPT1/BMP2/GREM2/NFATC4/DKK1/CSF3/WNT5A/WFIKKN1/BDNF/ADIPOQ	12
BP	GO:0007088	regulation of mitotic nuclear division	9/337	118/18903	0.000266112	0.00129687	0.000698488	TGFA/EGF/IGF1/TNF/IL1B/IL1A/BMP7/FGF8/BIRC5	9
BP	GO:0051057	positive regulation of small GTPase mediated signal transduction	7/337	71/18903	0.000268943	0.00130607	0.000703445	PIK3CG/KITLG/NRG1/IGF1/CSF1/ADCYAP1R1/EPO	7
BP	GO:0070527	platelet aggregation	7/337	71/18903	0.000268943	0.00130607	0.000703445	PIK3CG/SYK/PRKCA/CTSG/FGA/PRKCQ/IL6	7
BP	GO:2000379	positive regulation of reactive oxygen species metabolic process	7/337	71/18903	0.000268943	0.00130607	0.000703445	SYK/AGT/TLR4/PLCG2/MAPT/AGTR1/LEP	7
BP	GO:0050769	positive regulation of neurogenesis	13/337	231/18903	0.000272634	0.00132245	0.000712267	CX3CR1/IL33/TNF/BMP2/IL1B/GPER1/SLIT2/NR2E1/PTN/MAPT/BDNF/IL6/IL34	13
BP	GO:0048566	embryonic digestive tract development	5/337	33/18903	0.000275269	0.00133212	0.000717476	RARB/TNF/SCT/TGFB2/FGF9	5
BP	GO:0050901	leukocyte tethering or rolling	5/337	33/18903	0.000275269	0.00133212	0.000717476	CX3CR1/TNF/PTAFR/CCL21/LEP	5
BP	GO:0051783	regulation of nuclear division	10/337	145/18903	0.000279286	0.00134999	0.0007271	TGFA/EGF/IGF1/TNF/IL1B/IL1A/BMP7/FGF8/WNT5A/BIRC5	10
BP	GO:0001666	response to hypoxia	15/337	296/18903	0.000294606	0.00142239	0.000766095	PPARD/TNF/CYBB/BMP2/IL1A/BMP7/TGFB2/RORA/NPPC/NR4A2/PGF/ANGPTL4/EPO/LEP/ADIPOQ	15
BP	GO:0072073	kidney epithelium development	10/337	146/18903	0.000295174	0.00142348	0.000766681	RARB/SDC4/AGT/BMP2/FGF1/CRLF1/BMP7/SLIT2/FGF8/ADIPOQ	10
BP	GO:0034109	homotypic cell-cell adhesion	8/337	95/18903	0.000296959	0.00143043	0.000770424	PIK3CG/SYK/PRKCA/CTSG/CCL5/FGA/PRKCQ/IL6	8
BP	GO:0071774	response to fibroblast growth factor	9/337	120/18903	0.000301721	0.00145001	0.000780969	CCL2/FGF1/CCL5/FGF9/FGF12/FGF8/WNT5A/FGF17/FGF21	9
BP	GO:0090288	negative regulation of cellular response to growth factor stimulus	9/337	120/18903	0.000301721	0.00145001	0.000780969	AGT/SEMA6A/IL12B/GREM2/SLIT2/DKK1/WNT5A/IL4/TMPRSS6	9
BP	GO:0002281	macrophage activation involved in immune response	4/337	19/18903	0.000311203	0.00148698	0.000800882	CX3CR1/IL33/SYK/PLCG2	4
BP	GO:0002923	regulation of humoral immune response mediated by circulating immunoglobulin	4/337	19/18903	0.000311203	0.00148698	0.000800882	PTPRC/CR2/TNF/FCGR2B	4
BP	GO:0035930	corticosteroid hormone secretion	4/337	19/18903	0.000311203	0.00148698	0.000800882	AGT/BMP6/GAL/AGTR1	4
BP	GO:0043031	negative regulation of macrophage activation	4/337	19/18903	0.000311203	0.00148698	0.000800882	PTPRC/FCGR2B/IL4/IL31RA	4
BP	GO:0051797	regulation of hair follicle development	4/337	19/18903	0.000311203	0.00148698	0.000800882	TNF/TGFB2/WNT5A/GAL	4
BP	GO:0002762	negative regulation of myeloid leukocyte differentiation	6/337	52/18903	0.000313326	0.00149357	0.000804432	INPP5D/TLR4/LTF/IL4/INHA/ADIPOQ	6
BP	GO:0010543	regulation of platelet activation	6/337	52/18903	0.000313326	0.00149357	0.000804432	SYK/PRKCA/CTSG/TLR4/PRKCQ/IL6	6
BP	GO:0010469	regulation of signaling receptor activity	11/337	175/18903	0.00031366	0.00149357	0.000804432	TGFA/CALCR/EGF/CCL2/TNF/FCGR2B/GREM2/DKK1/WFIKKN1/AREG/CBLC	11
BP	GO:0007431	salivary gland development	5/337	34/18903	0.000318057	0.00150932	0.000812913	HGF/TNF/BMP7/TGFB2/FGF8	5
BP	GO:0090022	regulation of neutrophil chemotaxis	5/337	34/18903	0.000318057	0.00150932	0.000812913	CD74/CCL19/XCL1/CCL21/SLIT2	5
BP	GO:1902624	positive regulation of neutrophil migration	5/337	34/18903	0.000318057	0.00150932	0.000812913	CD74/CCL19/XCL1/CCL21/IL1A	5
BP	GO:0050795	regulation of behavior	7/337	73/18903	0.000319652	0.00151343	0.000815129	NPY/MC4R/OPRK1/OPRL1/AGRP/NR4A3/GHRHR	7
BP	GO:0071260	cellular response to mechanical stimulus	7/337	73/18903	0.000319652	0.00151343	0.000815129	IL33/AGT/TLR4/TLR7/IL1B/BMP6/IL13	7
BP	GO:0032355	response to estradiol	9/337	121/18903	0.000320952	0.00151786	0.000817513	SSTR1/AGT/TACR1/GPER1/BMP7/ADCYAP1R1/OPRL1/AREG/LEP	9
BP	GO:0018209	peptidyl-serine modification	16/337	332/18903	0.000327521	0.00154717	0.000833299	HGF/CALCR/SYK/PRKCA/ANGPT1/TNF/NTF3/IL11/DKK1/CSF3/WNT5A/PRKCG/EPO/BDNF/PRKCQ/IL6	16
BP	GO:0016525	negative regulation of angiogenesis	10/337	149/18903	0.00034744	0.00163876	0.000882629	HLA-G/TEK/AGT/TNF/SEMA6A/SEMA3E/FASLG/TGFB2/GDF2/PRL	10
BP	GO:0042058	regulation of epidermal growth factor receptor signaling pathway	7/337	74/18903	0.000347733	0.00163876	0.000882629	TGFA/EGF/AGT/GPER1/FASLG/AREG/CBLC	7
BP	GO:0046638	positive regulation of alpha-beta T cell differentiation	6/337	53/18903	0.000348093	0.00163876	0.000882629	HLA-DRA/SYK/CCL19/IL2RG/IL12B/TNFSF4	6
BP	GO:0030336	negative regulation of cell migration	17/337	368/18903	0.00035111	0.00165109	0.000889272	PPARD/CX3CR1/CD74/IL33/CCL2/NRG1/TNF/ACVR1C/SLURP1/CCL21/APOD/SLIT2/GDF2/SEMA6D/IL4/NODAL/ADIPOQ	17
BP	GO:0002446	neutrophil mediated immunity	5/337	35/18903	0.000365696	0.00171194	0.000922044	SYK/CTSG/PTAFR/AZU1/IL6	5
BP	GO:0002719	negative regulation of cytokine production involved in immune response	5/337	35/18903	0.000365696	0.00171194	0.000922044	HLA-F/ANGPT1/TNF/XCL1/TGFB2	5
BP	GO:0031128	developmental induction	5/337	35/18903	0.000365696	0.00171194	0.000922044	BMP2/FGF1/DKK1/FGF8/WNT5A	5
BP	GO:0043372	positive regulation of CD4-positive, alpha-beta T cell differentiation	5/337	35/18903	0.000365696	0.00171194	0.000922044	HLA-DRA/CCL19/IL2RG/IL12B/TNFSF4	5
BP	GO:0002643	regulation of tolerance induction	4/337	20/18903	0.000383567	0.00178354	0.000960611	HLA-B/HLA-G/PDCD1/CD3E	4
BP	GO:0002888	positive regulation of myeloid leukocyte mediated immunity	4/337	20/18903	0.000383567	0.00178354	0.000960611	HLA-E/BTK/PTAFR/C3	4
BP	GO:0033762	response to glucagon	4/337	20/18903	0.000383567	0.00178354	0.000960611	CYSLTR2/FGF21/GCGR/GLP2R	4
BP	GO:0060749	mammary gland alveolus development	4/337	20/18903	0.000383567	0.00178354	0.000960611	TGFA/EGF/PRLR/AREG	4
BP	GO:0061377	mammary gland lobule development	4/337	20/18903	0.000383567	0.00178354	0.000960611	TGFA/EGF/PRLR/AREG	4
BP	GO:0098543	detection of other organism	4/337	20/18903	0.000383567	0.00178354	0.000960611	HLA-B/HLA-A/TLR4/DMBT1	4
BP	GO:2000181	negative regulation of blood vessel morphogenesis	10/337	151/18903	0.000386402	0.00179472	0.00096663	HLA-G/TEK/AGT/TNF/SEMA6A/SEMA3E/FASLG/TGFB2/GDF2/PRL	10
BP	GO:0090287	regulation of cellular response to growth factor stimulus	16/337	338/18903	0.000398959	0.00185097	0.000996928	AGT/SEMA6A/BMP2/FGF1/IL1B/IL12B/GREM2/LTBP1/SLIT2/FGF9/GDF2/DKK1/WNT5A/WFIKKN1/IL4/TMPRSS6	16
BP	GO:0006809	nitric oxide biosynthetic process	7/337	76/18903	0.000409819	0.00189712	0.00102178	CX3CR1/AGT/TLR4/TNF/IL1B/RORA/PTX3	7
BP	GO:0051339	regulation of lyase activity	7/337	76/18903	0.000409819	0.00189712	0.00102178	VIPR2/GUCA2A/LTB4R2/TSHR/GIPR/GHRHR/GALR3	7
BP	GO:0050869	negative regulation of B cell activation	5/337	36/18903	0.000418537	0.00193103	0.00104005	INPP5D/BTK/FCGR2B/TNFAIP3/INHA	5
BP	GO:0051930	regulation of sensory perception of pain	5/337	36/18903	0.000418537	0.00193103	0.00104005	IL33/PTAFR/IL1A/OPRK1/OPRL1	5
BP	GO:0051931	regulation of sensory perception	5/337	36/18903	0.000418537	0.00193103	0.00104005	IL33/PTAFR/IL1A/OPRK1/OPRL1	5
BP	GO:0030316	osteoclast differentiation	8/337	100/18903	0.000421033	0.00194039	0.00104509	INPP5D/TLR4/CSF1/LTF/TNF/CSF1R/IL12B/IL4	8
BP	GO:0009612	response to mechanical stimulus	12/337	211/18903	0.000423185	0.00194815	0.00104927	IL33/AGT/TLR4/TLR7/CSF1/TNF/TACR1/IL1B/BMP6/PTN/MPO/IL13	12
BP	GO:0010518	positive regulation of phospholipase activity	6/337	55/18903	0.000426638	0.00195754	0.00105433	ITK/AGT/PTAFR/CCL5/ADCYAP1R1/AGTR1	6
BP	GO:0070169	positive regulation of biomineral tissue development	6/337	55/18903	0.000426638	0.00195754	0.00105433	LTF/BMP2/BMPR1B/BMP7/BMP6/PTN	6
BP	GO:1904645	response to amyloid-beta	6/337	55/18903	0.000426638	0.00195754	0.00105433	CALCR/TLR4/IGF1/TNF/FCGR2B/MMP12	6
BP	GO:0003206	cardiac chamber morphogenesis	9/337	126/18903	0.000432943	0.0019821	0.00106755	TEK/NRG1/NRP2/BMP2/BMP7/TGFB2/SLIT2/FGF8/WNT5A	9
BP	GO:0038127	ERBB signaling pathway	9/337	126/18903	0.000432943	0.0019821	0.00106755	TGFA/EGF/NRG1/AGT/NRG4/GPER1/FASLG/AREG/CBLC	9
BP	GO:0046890	regulation of lipid biosynthetic process	11/337	182/18903	0.000438072	0.00200337	0.00107901	FABP3/CD74/TNF/BMP2/FGF1/IL1B/GPER1/C3/IL1A/BMP6/LEP	11
BP	GO:0002534	cytokine production involved in inflammatory response	7/337	77/18903	0.000444019	0.00202389	0.00109006	TLR4/TNF/APOD/IL17D/IL1R2/IL6/LEP	7
BP	GO:0031279	regulation of cyclase activity	7/337	77/18903	0.000444019	0.00202389	0.00109006	VIPR2/GUCA2A/LTB4R2/TSHR/GIPR/GHRHR/GALR3	7
BP	GO:1900015	regulation of cytokine production involved in inflammatory response	7/337	77/18903	0.000444019	0.00202389	0.00109006	TLR4/TNF/APOD/IL17D/IL1R2/IL6/LEP	7
BP	GO:0007584	response to nutrient	10/337	154/18903	0.00045162	0.00205628	0.00110751	PPARD/A2M/CYBB/IL1A/BMP7/GIPR/EPO/LEP/ADIPOQ/GCGR	10
BP	GO:0036293	response to decreased oxygen levels	15/337	309/18903	0.000463368	0.00210417	0.0011333	PPARD/TNF/CYBB/BMP2/IL1A/BMP7/TGFB2/RORA/NPPC/NR4A2/PGF/ANGPTL4/EPO/LEP/ADIPOQ	15
BP	GO:0055074	calcium ion homeostasis	15/337	309/18903	0.000463368	0.00210417	0.0011333	PTPRC/XCR1/CCR5/CCL7/CCL19/GPER1/CCL11/XCL1/FASLG/LCK/CCL21/CCL5/PLCG2/WNT5A/IL13	15
BP	GO:0050804	modulation of chemical synaptic transmission	19/337	448/18903	0.000465698	0.00210417	0.0011333	CX3CR1/CCL2/AGT/TNF/TACR1/IL1B/GPER1/SCTR/NTF3/SCT/VGF/NR2E1/NFATC4/PTN/MAPT/DKK1/PRKCG/BDNF/ADIPOQ	19
BP	GO:0032098	regulation of appetite	4/337	21/18903	0.0004672	0.00210417	0.0011333	NPY/SCTR/SCT/LEP	4
BP	GO:0032616	interleukin-13 production	4/337	21/18903	0.0004672	0.00210417	0.0011333	HLA-E/IL33/TNFSF4/IL4	4
BP	GO:0032656	regulation of interleukin-13 production	4/337	21/18903	0.0004672	0.00210417	0.0011333	HLA-E/IL33/TNFSF4/IL4	4
BP	GO:0033005	positive regulation of mast cell activation	4/337	21/18903	0.0004672	0.00210417	0.0011333	SYK/NR4A3/IL4/IL13	4
BP	GO:0060445	branching involved in salivary gland morphogenesis	4/337	21/18903	0.0004672	0.00210417	0.0011333	HGF/TNF/BMP7/FGF8	4
BP	GO:0071605	monocyte chemotactic protein-1 production	4/337	21/18903	0.0004672	0.00210417	0.0011333	SYK/IL1B/APOD/ADIPOQ	4
BP	GO:0071637	regulation of monocyte chemotactic protein-1 production	4/337	21/18903	0.0004672	0.00210417	0.0011333	SYK/IL1B/APOD/ADIPOQ	4
BP	GO:0043551	regulation of phosphatidylinositol 3-kinase activity	6/337	56/18903	0.000470765	0.00211336	0.00113825	VAV3/TEK/CCL19/CCL21/FLT3/VAV2	6
BP	GO:0045761	regulation of adenylate cyclase activity	6/337	56/18903	0.000470765	0.00211336	0.00113825	VIPR2/LTB4R2/TSHR/GIPR/GHRHR/GALR3	6
BP	GO:0110151	positive regulation of biomineralization	6/337	56/18903	0.000470765	0.00211336	0.00113825	LTF/BMP2/BMPR1B/BMP7/BMP6/PTN	6
BP	GO:0010675	regulation of cellular carbohydrate metabolic process	10/337	155/18903	0.000475292	0.00213138	0.00114796	RORC/IGF1/CD244/PTAFR/GPER1/ADCYAP1R1/RORA/LEP/ADIPOQ/GCGR	10
BP	GO:0010092	specification of animal organ identity	5/337	37/18903	0.000476936	0.00213645	0.00115068	BMP2/FGF1/DKK1/FGF8/WNT5A	5
BP	GO:0099177	regulation of trans-synaptic signaling	19/337	449/18903	0.000478528	0.00214127	0.00115328	CX3CR1/CCL2/AGT/TNF/TACR1/IL1B/GPER1/SCTR/NTF3/SCT/VGF/NR2E1/NFATC4/PTN/MAPT/DKK1/PRKCG/BDNF/ADIPOQ	19
BP	GO:0008643	carbohydrate transport	10/337	156/18903	0.000499986	0.00223248	0.00120241	PPARD/SORT1/IGF1/TNF/IL1B/C3/NR4A3/FGF21/LEP/ADIPOQ	10
BP	GO:0050770	regulation of axonogenesis	10/337	156/18903	0.000499986	0.00223248	0.00120241	SEMA6A/SEMA3E/SEMA6B/SLIT2/SLIT1/MAPT/WNT5A/SEMA6D/BDNF/SEMA3B	10
BP	GO:0043255	regulation of carbohydrate biosynthetic process	8/337	103/18903	0.000513751	0.00229148	0.00123419	EGF/IGF1/CD244/PTAFR/GPER1/ADCYAP1R1/LEP/ADIPOQ	8
BP	GO:0051928	positive regulation of calcium ion transport	9/337	129/18903	0.000514337	0.00229164	0.00123427	CALCR/CCL2/GPER1/XCL1/HSPA2/CCL5/ADCYAP1R1/PLCG2/IL13	9
BP	GO:0008347	glial cell migration	6/337	57/18903	0.000518366	0.00230465	0.00124128	CX3CR1/CCL2/CSF1/TGFB2/NR2E1/AZU1	6
BP	GO:0061756	leukocyte adhesion to vascular endothelial cell	6/337	57/18903	0.000518366	0.00230465	0.00124128	CX3CR1/TNF/PTAFR/CCL21/IL6/LEP	6
BP	GO:1903556	negative regulation of tumor necrosis factor superfamily cytokine production	7/337	79/18903	0.000519244	0.00230609	0.00124205	TLR4/IGF1/LTF/ORM1/TNFAIP3/IL4/ADIPOQ	7
BP	GO:0006109	regulation of carbohydrate metabolic process	11/337	186/18903	0.000526104	0.00233406	0.00125712	EGF/RORC/IGF1/CD244/PTAFR/GPER1/ADCYAP1R1/RORA/LEP/ADIPOQ/GCGR	11
BP	GO:0010742	macrophage derived foam cell differentiation	5/337	38/18903	0.000541262	0.00239875	0.00129196	CETP/AGT/CSF1/AGTR1/ADIPOQ	5
BP	GO:0030324	lung development	11/337	187/18903	0.000550283	0.00243613	0.00131209	TNF/FGF1/THRB/FGF9/MMP12/FGF8/WNT5A/SFTPD/PGR/NODAL/IL13	11
BP	GO:0045926	negative regulation of growth	13/337	249/18903	0.00055763	0.00246379	0.00132699	PPARD/AGT/SEMA6A/SEMA3E/TGFB2/SEMA6B/SLIT2/SLIT1/GDF2/OSGIN1/WNT5A/SEMA6D/SEMA3B	13
BP	GO:0001895	retina homeostasis	7/337	80/18903	0.000560481	0.00246379	0.00132699	B2M/AZGP1/LTF/LYZ/ALB/IGKC/LCN1	7
BP	GO:1901184	regulation of ERBB signaling pathway	7/337	80/18903	0.000560481	0.00246379	0.00132699	TGFA/EGF/AGT/GPER1/FASLG/AREG/CBLC	7
BP	GO:0002223	stimulatory C-type lectin receptor signaling pathway	4/337	22/18903	0.00056305	0.00246379	0.00132699	SYK/KLRC3/KLRC4/PLCG2	4
BP	GO:0010888	negative regulation of lipid storage	4/337	22/18903	0.00056305	0.00246379	0.00132699	PPARD/TNF/IL6/LEP	4
BP	GO:0030449	regulation of complement activation	4/337	22/18903	0.00056305	0.00246379	0.00132699	A2M/CR2/IL1B/C3	4
BP	GO:0034104	negative regulation of tissue remodeling	4/337	22/18903	0.00056305	0.00246379	0.00132699	INPP5D/AGT/TNFAIP3/IL6	4
BP	GO:0045061	thymic T cell selection	4/337	22/18903	0.00056305	0.00246379	0.00132699	CD74/PTPRC/CD3E/CD3G	4
BP	GO:1990840	response to lectin	4/337	22/18903	0.00056305	0.00246379	0.00132699	SYK/KLRC3/KLRC4/PLCG2	4
BP	GO:1990858	cellular response to lectin	4/337	22/18903	0.00056305	0.00246379	0.00132699	SYK/KLRC3/KLRC4/PLCG2	4
BP	GO:2000831	regulation of steroid hormone secretion	4/337	22/18903	0.00056305	0.00246379	0.00132699	AGT/BMP6/GAL/AGTR1	4
BP	GO:0001541	ovarian follicle development	6/337	58/18903	0.000569629	0.00248995	0.00134108	KITLG/BMPR1B/VGF/PTX3/INHA/UMODL1	6
BP	GO:0035051	cardiocyte differentiation	10/337	159/18903	0.000580532	0.00253495	0.00136532	RARB/NRG1/AGT/IGF1/BMP2/GPER1/BMP7/TGFB2/DKK1/NOX4	10
BP	GO:0016049	cell growth	20/337	493/18903	0.00058254	0.00254105	0.0013686	PPARD/AGT/IGF1/NRP2/SEMA6A/SEMA3E/TGFB2/SEMA6B/SLIT2/SLIT1/GDF2/MAPT/OSGIN1/WNT5A/SEMA6D/BDNF/PRKCQ/AGTR1/SEMA3B/TNC	20
BP	GO:0006956	complement activation	9/337	132/18903	0.000607883	0.00264604	0.00142515	A2M/CR2/IL1B/IGHD/COLEC10/C3/IGKC/FCN2/MBL2	9
BP	GO:0048565	digestive tract development	9/337	132/18903	0.000607883	0.00264604	0.00142515	RARB/NPY/TNF/SCT/TGFB2/PYY/FGF9/WNT5A/NODAL	9
BP	GO:0001990	regulation of systemic arterial blood pressure by hormone	5/337	39/18903	0.000611891	0.00265075	0.00142768	AGT/CTSG/TACR1/CMA1/AGTR1	5
BP	GO:0045730	respiratory burst	5/337	39/18903	0.000611891	0.00265075	0.00142768	PIK3CG/CYBB/SLC11A1/RAC3/MPO	5
BP	GO:0090077	foam cell differentiation	5/337	39/18903	0.000611891	0.00265075	0.00142768	CETP/AGT/CSF1/AGTR1/ADIPOQ	5
BP	GO:0001915	negative regulation of T cell mediated cytotoxicity	3/337	10/18903	0.000614066	0.00265075	0.00142768	PTPRC/HLA-G/FCGR2B	3
BP	GO:0003129	heart induction	3/337	10/18903	0.000614066	0.00265075	0.00142768	BMP2/DKK1/WNT5A	3
BP	GO:0008343	adult feeding behavior	3/337	10/18903	0.000614066	0.00265075	0.00142768	NPY/AGRP/LEP	3
BP	GO:0031666	positive regulation of lipopolysaccharide-mediated signaling pathway	3/337	10/18903	0.000614066	0.00265075	0.00142768	PRKCA/CD14/BMP6	3
BP	GO:2000563	positive regulation of CD4-positive, alpha-beta T cell proliferation	3/337	10/18903	0.000614066	0.00265075	0.00142768	XCL1/CD3E/PRKCQ	3
BP	GO:0030198	extracellular matrix organization	15/337	318/18903	0.000623727	0.00268568	0.0014465	AGT/CTSG/TNF/CTSS/BMP2/CMA1/TGFB2/BMP1/NR2E1/PTX3/MMP12/TMPRSS6/ANGPTL7/IL6/ELN	15
BP	GO:0002090	regulation of receptor internalization	6/337	59/18903	0.000624742	0.00268568	0.0014465	EGF/SYK/ANGPT1/NTF3/PLCG2/DKK1	6
BP	GO:0007566	embryo implantation	6/337	59/18903	0.000624742	0.00268568	0.0014465	PPARD/PRLR/ACVR1C/IL1B/EPO/NODAL	6
BP	GO:0010574	regulation of vascular endothelial growth factor production	6/337	59/18903	0.000624742	0.00268568	0.0014465	IL1B/C3/IL1A/RORA/NODAL/IL6	6
BP	GO:0043062	extracellular structure organization	15/337	319/18903	0.000644162	0.0027663	0.00148992	AGT/CTSG/TNF/CTSS/BMP2/CMA1/TGFB2/BMP1/NR2E1/PTX3/MMP12/TMPRSS6/ANGPTL7/IL6/ELN	15
BP	GO:0030323	respiratory tube development	11/337	191/18903	0.000656487	0.00281632	0.00151686	TNF/FGF1/THRB/FGF9/MMP12/FGF8/WNT5A/SFTPD/PGR/NODAL/IL13	11
BP	GO:0014013	regulation of gliogenesis	8/337	107/18903	0.000662416	0.00283883	0.00152898	IL33/TNF/BMP2/IL1B/NR2E1/PTN/IL6/IL34	8
BP	GO:0050792	regulation of viral process	10/337	162/18903	0.000671529	0.00286253	0.00154175	SLPI/CD74/TRIM22/CIITA/LTF/TNF/CD4/CCL5/PTX3/MBL2	10
BP	GO:0010560	positive regulation of glycoprotein biosynthetic process	4/337	23/18903	0.000672078	0.00286253	0.00154175	IL33/CCL19/IGF1/CCL21	4
BP	GO:0010893	positive regulation of steroid biosynthetic process	4/337	23/18903	0.000672078	0.00286253	0.00154175	TNF/FGF1/IL1A/BMP6	4
BP	GO:0034695	response to prostaglandin E	4/337	23/18903	0.000672078	0.00286253	0.00154175	A2M/CCL19/CCL21/TNFSF4	4
BP	GO:0048143	astrocyte activation	4/337	23/18903	0.000672078	0.00286253	0.00154175	TNF/IL1B/MAPT/IL6	4
BP	GO:1900120	regulation of receptor binding	4/337	23/18903	0.000672078	0.00286253	0.00154175	B2M/GREM2/BDNF/ADIPOQ	4
BP	GO:0043407	negative regulation of MAP kinase activity	6/337	60/18903	0.0006839	0.0029099	0.00156726	AGT/BMP2/IL1B/BMP7/ADIPOQ/CBLC	6
BP	GO:0045229	external encapsulating structure organization	15/337	321/18903	0.000686748	0.00291903	0.00157218	AGT/CTSG/TNF/CTSS/BMP2/CMA1/TGFB2/BMP1/NR2E1/PTX3/MMP12/TMPRSS6/ANGPTL7/IL6/ELN	15
BP	GO:0032965	regulation of collagen biosynthetic process	5/337	40/18903	0.000689206	0.0029235	0.00157459	PPARD/CIITA/NPPC/VIM/IL6	5
BP	GO:0045923	positive regulation of fatty acid metabolic process	5/337	40/18903	0.000689206	0.0029235	0.00157459	PPARD/CD74/IL1B/NR4A3/ADIPOQ	5
BP	GO:0072507	divalent inorganic cation homeostasis	16/337	356/18903	0.000699276	0.00296319	0.00159597	PTPRC/XCR1/CCR5/CCL7/CCL19/GPER1/CCL11/XCL1/FASLG/LCK/CCL21/CCL5/PLCG2/WNT5A/SLC11A1/IL13	16
BP	GO:1902893	regulation of miRNA transcription	6/337	61/18903	0.000747303	0.00316348	0.00170384	PPARD/TNF/BMP2/TGFB2/NFATC4/PRL	6
BP	GO:0033209	tumor necrosis factor-mediated signaling pathway	8/337	109/18903	0.000748778	0.0031665	0.00170547	SYK/TNFSF18/TNF/TNFRSF18/TNFAIP3/TNFRSF19/TNFSF13B/ADIPOQ	8
BP	GO:0032418	lysosome localization	7/337	84/18903	0.000752188	0.00317124	0.00170802	PIK3CG/BTK/SYK/PTGDR/NR4A3/IL4/IL13	7
BP	GO:0097006	regulation of plasma lipoprotein particle levels	7/337	84/18903	0.000752188	0.00317124	0.00170802	CETP/AGT/FGF21/MPO/AGTR1/PLTP/ADIPOQ	7
BP	GO:1990849	vacuolar localization	7/337	84/18903	0.000752188	0.00317124	0.00170802	PIK3CG/BTK/SYK/PTGDR/NR4A3/IL4/IL13	7
BP	GO:0015849	organic acid transport	15/337	324/18903	0.000755108	0.00318033	0.00171291	FABP3/PPARD/FABP2/SYK/AGT/TNF/RBP5/IL1B/NR0B2/IL1A/FABP6/SLC11A1/FABP4/TRH/LEP	15
BP	GO:1904062	regulation of cation transmembrane transport	17/337	394/18903	0.000757981	0.0031892	0.00171769	PIK3CG/CALCR/CCL2/AGT/KCNH2/CTSS/GPER1/XCL1/HSPA2/OPRK1/ADCYAP1R1/OPRL1/PLCG2/FGF12/GAL/EPO/IL13	17
BP	GO:0003007	heart morphogenesis	13/337	258/18903	0.000776012	0.00326176	0.00175677	TEK/NRG1/NRP2/BMP2/BMP7/TGFB2/LEFTY1/SLIT2/DKK1/FGF8/WNT5A/NODAL/ELN	13
BP	GO:0010623	programmed cell death involved in cell development	4/337	24/18903	0.000795248	0.00333924	0.0017985	KITLG/IL1B/FASLG/IL1A	4
BP	GO:0009410	response to xenobiotic stimulus	18/337	432/18903	0.000800578	0.00335823	0.00180873	TGFA/VAV3/RORC/KCNH2/TNF/CYBB/IL1B/LCK/PCSK1/VAV2/TGFB2/ADCYAP1R1/RORA/NPPC/PGF/GAL/FGF21/ADIPOQ	18
BP	GO:0010001	glial cell differentiation	12/337	227/18903	0.000808793	0.00338927	0.00182545	IL33/NRG1/TLR4/TNF/BMP2/IL1B/NR2E1/PTN/VIM/MAPT/IL6/IL34	12
BP	GO:0022617	extracellular matrix disassembly	6/337	62/18903	0.000815153	0.0034022	0.00183241	CTSG/CTSS/CMA1/MMP12/TMPRSS6/IL6	6
BP	GO:0045428	regulation of nitric oxide biosynthetic process	6/337	62/18903	0.000815153	0.0034022	0.00183241	CX3CR1/AGT/TLR4/TNF/IL1B/PTX3	6
BP	GO:0061614	miRNA transcription	6/337	62/18903	0.000815153	0.0034022	0.00183241	PPARD/TNF/BMP2/TGFB2/NFATC4/PRL	6
BP	GO:1903409	reactive oxygen species biosynthetic process	6/337	62/18903	0.000815153	0.0034022	0.00183241	DUOX2/TLR4/CYBB/PLCG2/NOX4/MPO	6
BP	GO:0001660	fever generation	3/337	11/18903	0.000833217	0.0034329	0.00184895	TNF/IL1B/IL1A	3
BP	GO:0032276	regulation of gonadotropin secretion	3/337	11/18903	0.000833217	0.0034329	0.00184895	OPRK1/INHA/LEP	3
BP	GO:0033860	regulation of NAD(P)H oxidase activity	3/337	11/18903	0.000833217	0.0034329	0.00184895	AGT/AGTR1/IL13	3
BP	GO:0042487	regulation of odontogenesis of dentin-containing tooth	3/337	11/18903	0.000833217	0.0034329	0.00184895	CSF1/BMP2/FGF8	3
BP	GO:0044848	biological phase	3/337	11/18903	0.000833217	0.0034329	0.00184895	TGFB2/WNT5A/GAL	3
BP	GO:0045060	negative thymic T cell selection	3/337	11/18903	0.000833217	0.0034329	0.00184895	CD74/PTPRC/CD3E	3
BP	GO:0048505	regulation of timing of cell differentiation	3/337	11/18903	0.000833217	0.0034329	0.00184895	NR2E1/FGF9/NODAL	3
BP	GO:0070471	uterine smooth muscle contraction	3/337	11/18903	0.000833217	0.0034329	0.00184895	AGT/TACR1/GPER1	3
BP	GO:0097278	complement-dependent cytotoxicity	3/337	11/18903	0.000833217	0.0034329	0.00184895	C3/IL4/IL13	3
BP	GO:0098883	synapse pruning	3/337	11/18903	0.000833217	0.0034329	0.00184895	CX3CR1/C3/DKK1	3
BP	GO:1903027	regulation of opsonization	3/337	11/18903	0.000833217	0.0034329	0.00184895	COLEC10/FCN2/MBL2	3
BP	GO:2000826	regulation of heart morphogenesis	3/337	11/18903	0.000833217	0.0034329	0.00184895	BMP2/DKK1/WNT5A	3
BP	GO:0090068	positive regulation of cell cycle process	13/337	260/18903	0.000833243	0.0034329	0.00184895	TGFA/EGF/IGF1/TNF/IL1B/HSPA2/IL1A/SSTR5/RXFP3/PLCG2/FGF8/WNT5A/BIRC5	13
BP	GO:0045787	positive regulation of cell cycle	16/337	362/18903	0.000835023	0.00343682	0.00185106	TGFA/EGF/PRKCA/IGF1/TNF/IL1B/HSPA2/IL1A/SSTR5/TGFB2/RXFP3/NR2E1/PLCG2/FGF8/WNT5A/BIRC5	16
BP	GO:0021983	pituitary gland development	5/337	42/18903	0.000865471	0.00354219	0.00190781	BMP2/PCSK1/FGF8/WNT5A/GHRHR	5
BP	GO:0032814	regulation of natural killer cell activation	5/337	42/18903	0.000865471	0.00354219	0.00190781	HLA-E/HLA-F/IL12B/KLRC3/LEP	5
BP	GO:0045429	positive regulation of nitric oxide biosynthetic process	5/337	42/18903	0.000865471	0.00354219	0.00190781	AGT/TLR4/TNF/IL1B/PTX3	5
BP	GO:2000249	regulation of actin cytoskeleton reorganization	5/337	42/18903	0.000865471	0.00354219	0.00190781	TEK/CSF1R/SEMA3E/NTF3/CSF3	5
BP	GO:2000403	positive regulation of lymphocyte migration	5/337	42/18903	0.000865471	0.00354219	0.00190781	CCL7/XCL1/CCL21/CCL5/WNT5A	5
BP	GO:0045921	positive regulation of exocytosis	7/337	86/18903	0.000865736	0.00354219	0.00190781	HLA-F/SYK/SDC4/PTAFR/FGA/IL4/IL13	7
BP	GO:0008277	regulation of G protein-coupled receptor signaling pathway	9/337	139/18903	0.000881054	0.00360132	0.00193966	CALCR/MET/PRKCA/GPER1/CCL5/C3/OPRL1/FGF8/GIPR	9
BP	GO:0032481	positive regulation of type I interferon production	6/337	63/18903	0.000887659	0.00361764	0.00194845	SYK/TLR4/TLR7/CD14/PLCG2/MMP12	6
BP	GO:0046173	polyol biosynthetic process	6/337	63/18903	0.000887659	0.00361764	0.00194845	CD244/PTAFR/GPER1/ADCYAP1R1/PLCG2/LEP	6
BP	GO:0046579	positive regulation of Ras protein signal transduction	6/337	63/18903	0.000887659	0.00361764	0.00194845	PIK3CG/KITLG/NRG1/IGF1/CSF1/EPO	6
BP	GO:0048639	positive regulation of developmental growth	10/337	168/18903	0.000888985	0.0036195	0.00194945	PPARD/IGF1/CSF1/IL7/FGF9/MAPT/FGF8/BDNF/GHRHR/LEP	10
BP	GO:0008543	fibroblast growth factor receptor signaling pathway	7/337	87/18903	0.000927362	0.00376837	0.00202963	FGF1/FGF9/FGF12/FGF8/WNT5A/FGF17/FGF21	7
BP	GO:0019915	lipid storage	7/337	87/18903	0.000927362	0.00376837	0.00202963	PPARD/TNF/ACVR1C/IL1B/C3/IL6/LEP	7
BP	GO:0090023	positive regulation of neutrophil chemotaxis	4/337	25/18903	0.000933531	0.00378604	0.00203915	CD74/CCL19/XCL1/CCL21	4
BP	GO:0098581	detection of external biotic stimulus	4/337	25/18903	0.000933531	0.00378604	0.00203915	HLA-B/HLA-A/TLR4/DMBT1	4
BP	GO:0019229	regulation of vasoconstriction	6/337	64/18903	0.000965031	0.00390695	0.00210427	CYSLTR1/AGT/TACR1/FGA/AGTR1/LEP	6
BP	GO:0043507	positive regulation of JUN kinase activity	5/337	43/18903	0.000965226	0.00390695	0.00210427	SYK/CCL19/TNF/DKK1/WNT5A	5
BP	GO:0001889	liver development	9/337	141/18903	0.000975177	0.00393956	0.00212184	HGF/TGFA/MET/TNF/FGF1/TNFAIP3/PTN/NODAL/IL6	9
BP	GO:0046328	regulation of JNK cascade	9/337	141/18903	0.000975177	0.00393956	0.00212184	CCL19/TLR4/TNF/IL1B/CCL21/FCGR2B/IL1A/TNFRSF19/WNT5A	9
BP	GO:0045936	negative regulation of phosphate metabolic process	18/337	440/18903	0.000986428	0.00398115	0.00214423	HGF/PTPRC/ANGPT1/AGT/TNF/BMP2/IL1B/NTF3/BMP7/TGFB2/SLIT2/TNFAIP3/MAPT/DKK1/FABP4/INHA/ADIPOQ/CBLC	18
BP	GO:0046889	positive regulation of lipid biosynthetic process	7/337	88/18903	0.000992391	0.00400133	0.0021551	FABP3/CD74/TNF/FGF1/IL1B/IL1A/BMP6	7
BP	GO:0051216	cartilage development	11/337	201/18903	0.000998641	0.00402263	0.00216657	RARB/BMP2/BMPR1B/BMP7/BMP6/BMP1/FGF9/GDF2/NPPC/WNT5A/LEP	11
BP	GO:0009408	response to heat	8/337	114/18903	0.00100476	0.00404336	0.00217774	IGF1/TACR1/MICB/FGF1/CD14/HSPA2/IL1A/MAPT	8
BP	GO:0010563	negative regulation of phosphorus metabolic process	18/337	441/18903	0.00101207	0.00406882	0.00219145	HGF/PTPRC/ANGPT1/AGT/TNF/BMP2/IL1B/NTF3/BMP7/TGFB2/SLIT2/TNFAIP3/MAPT/DKK1/FABP4/INHA/ADIPOQ/CBLC	18
BP	GO:0038061	NIK/NF-kappaB signaling	9/337	142/18903	0.00102521	0.00411369	0.00221562	CCL19/TLR4/TLR7/TNF/IL1B/CD14/IL12B/BMP7/IL18R1	9
BP	GO:1903900	regulation of viral life cycle	9/337	142/18903	0.00102521	0.00411369	0.00221562	SLPI/CD74/TRIM22/CIITA/LTF/TNF/CD4/CCL5/PTX3	9
BP	GO:0060760	positive regulation of response to cytokine stimulus	6/337	65/18903	0.00104749	0.00419903	0.00226159	CD74/TLR4/CSF1/IL7/MMP12/WNT5A	6
BP	GO:0001960	negative regulation of cytokine-mediated signaling pathway	7/337	89/18903	0.00106096	0.00424484	0.00228626	PTPRC/CCL5/SLIT2/MMP12/IL1R2/IL6/ADIPOQ	7
BP	GO:0048678	response to axon injury	7/337	89/18903	0.00106096	0.00424484	0.00228626	PCSK1/APOD/PTN/PLCG2/GIPR/EPO/TNC	7
BP	GO:0007254	JNK cascade	10/337	172/18903	0.00106379	0.004248	0.00228796	CCL19/TLR4/TLR7/TNF/IL1B/CCL21/FCGR2B/IL1A/TNFRSF19/WNT5A	10
BP	GO:1990138	neuron projection extension	10/337	172/18903	0.00106379	0.004248	0.00228796	NRP2/SEMA6A/SEMA3E/SEMA6B/SLIT2/SLIT1/MAPT/WNT5A/SEMA6D/SEMA3B	10
BP	GO:0010828	positive regulation of glucose transmembrane transport	5/337	44/18903	0.00107328	0.00427357	0.00230173	IGF1/C3/NR4A3/FGF21/ADIPOQ	5
BP	GO:0032689	negative regulation of interferon-gamma production	5/337	44/18903	0.00107328	0.00427357	0.00230173	IL33/TLR4/XCL1/TNFSF4/INHA	5
BP	GO:0044058	regulation of digestive system process	5/337	44/18903	0.00107328	0.00427357	0.00230173	TACR1/OPRK1/SCT/OPRL1/LEP	5
BP	GO:0046165	alcohol biosynthetic process	9/337	143/18903	0.0010773	0.00428138	0.00230594	CD244/PTAFR/BMP2/FGF1/GPER1/BMP6/ADCYAP1R1/PLCG2/LEP	9
BP	GO:0055123	digestive system development	9/337	143/18903	0.0010773	0.00428138	0.00230594	RARB/NPY/TNF/SCT/TGFB2/PYY/FGF9/WNT5A/NODAL	9
BP	GO:0043931	ossification involved in bone maturation	4/337	26/18903	0.0010879	0.00430761	0.00232007	IGF1/LTF/BMP2/LEP	4
BP	GO:1903020	positive regulation of glycoprotein metabolic process	4/337	26/18903	0.0010879	0.00430761	0.00232007	IL33/CCL19/IGF1/CCL21	4
BP	GO:0002674	negative regulation of acute inflammatory response	3/337	12/18903	0.00109633	0.00430761	0.00232007	NPY/FCGR2B/IL4	3
BP	GO:0003306	Wnt signaling pathway involved in heart development	3/337	12/18903	0.00109633	0.00430761	0.00232007	BMP2/DKK1/WNT5A	3
BP	GO:0032817	regulation of natural killer cell proliferation	3/337	12/18903	0.00109633	0.00430761	0.00232007	HLA-E/IL12B/LEP	3
BP	GO:0032957	inositol trisphosphate metabolic process	3/337	12/18903	0.00109633	0.00430761	0.00232007	PTAFR/GPER1/PLCG2	3
BP	GO:0038180	nerve growth factor signaling pathway	3/337	12/18903	0.00109633	0.00430761	0.00232007	SORT1/NTF3/BDNF	3
BP	GO:0040034	regulation of development, heterochronic	3/337	12/18903	0.00109633	0.00430761	0.00232007	NR2E1/FGF9/NODAL	3
BP	GO:0043380	regulation of memory T cell differentiation	3/337	12/18903	0.00109633	0.00430761	0.00232007	HLA-DRA/IL12B/TNFSF4	3
BP	GO:0043383	negative T cell selection	3/337	12/18903	0.00109633	0.00430761	0.00232007	CD74/PTPRC/CD3E	3
BP	GO:0048853	forebrain morphogenesis	3/337	12/18903	0.00109633	0.00430761	0.00232007	SLIT1/FGF8/WNT5A	3
BP	GO:0051673	membrane disruption in another organism	3/337	12/18903	0.00109633	0.00430761	0.00232007	LTF/RNASE7/DEFA4	3
BP	GO:0070482	response to oxygen levels	15/337	337/18903	0.00112211	0.00440474	0.00237238	PPARD/TNF/CYBB/BMP2/IL1A/BMP7/TGFB2/RORA/NPPC/NR4A2/PGF/ANGPTL4/EPO/LEP/ADIPOQ	15
BP	GO:0061008	hepaticobiliary system development	9/337	144/18903	0.00113151	0.00443743	0.00238999	HGF/TGFA/MET/TNF/FGF1/TNFAIP3/PTN/NODAL/IL6	9
BP	GO:0010517	regulation of phospholipase activity	6/337	66/18903	0.00113524	0.00444788	0.00239562	ITK/AGT/PTAFR/CCL5/ADCYAP1R1/AGTR1	6
BP	GO:0032868	response to insulin	13/337	269/18903	0.00113662	0.00444907	0.00239625	SORT1/AGT/ACVR1C/IL1B/MC4R/OPRK1/VGF/AGRP/GAL/PRKCQ/GHRHR/LEP/ADIPOQ	13
BP	GO:0051346	negative regulation of hydrolase activity	16/337	373/18903	0.00114254	0.00446805	0.00240648	SLPI/HGF/SORT1/A2M/AGT/LTF/TNF/C3/WFDC2/TGFB2/PTX3/SERPIND1/ANGPTL4/WFIKKN1/BIRC5/LCN1	16
BP	GO:1901654	response to ketone	11/337	205/18903	0.00117152	0.00457706	0.00246519	A2M/PTGDR/CCL19/PTAFR/TACR1/CYBB/CCL21/TNFSF4/TGFB2/SLIT2/EPO	11
BP	GO:0031644	regulation of nervous system process	9/337	145/18903	0.00118791	0.00462768	0.00249245	HGF/IL33/AGT/TNF/PTAFR/IL1A/OPRK1/OPRL1/FGF12	9
BP	GO:0010712	regulation of collagen metabolic process	5/337	45/18903	0.00119004	0.00462768	0.00249245	PPARD/CIITA/NPPC/VIM/IL6	5
BP	GO:0019098	reproductive behavior	5/337	45/18903	0.00119004	0.00462768	0.00249245	SEMG1/TACR1/THRB/OPRK1/VGF	5
BP	GO:0071827	plasma lipoprotein particle organization	5/337	45/18903	0.00119004	0.00462768	0.00249245	CETP/AGT/MPO/AGTR1/PLTP	5
BP	GO:1900744	regulation of p38MAPK cascade	5/337	45/18903	0.00119004	0.00462768	0.00249245	HGF/BMP2/IL1B/OPRK1/LEP	5
BP	GO:0001942	hair follicle development	7/337	91/18903	0.00120922	0.00469349	0.0025279	TNF/TGFB2/TNFRSF19/DKK1/WNT5A/GAL/LGR5	7
BP	GO:0048525	negative regulation of viral process	7/337	91/18903	0.00120922	0.00469349	0.0025279	SLPI/CIITA/LTF/TNF/CCL5/PTX3/MBL2	7
BP	GO:0043087	regulation of GTPase activity	16/337	376/18903	0.00124139	0.00481387	0.00259274	MET/CCL17/CCL2/VAV3/CCL7/CCL19/CCL11/XCL1/CCL21/CCL5/NTF3/VAV2/PRTN3/CCL22/WNT5A/CCL18	16
BP	GO:0032740	positive regulation of interleukin-17 production	4/337	27/18903	0.00125932	0.00486525	0.00262041	BTK/IL12B/PRKCQ/IL6	4
BP	GO:0035929	steroid hormone secretion	4/337	27/18903	0.00125932	0.00486525	0.00262041	AGT/BMP6/GAL/AGTR1	4
BP	GO:0036037	CD8-positive, alpha-beta T cell activation	4/337	27/18903	0.00125932	0.00486525	0.00262041	HLA-E/HLA-A/TNFSF8/XCL1	4
BP	GO:0045745	positive regulation of G protein-coupled receptor signaling pathway	4/337	27/18903	0.00125932	0.00486525	0.00262041	PRKCA/GPER1/C3/FGF8	4
BP	GO:0050680	negative regulation of epithelial cell proliferation	10/337	176/18903	0.00126576	0.00488558	0.00263136	B2M/PPARD/CCL2/TNF/SLURP1/IL12B/TGFB2/GDF2/WNT5A/PRL	10
BP	GO:0033173	calcineurin-NFAT signaling cascade	5/337	46/18903	0.00131594	0.00506513	0.00272806	NRG1/IGF1/TNF/NFATC4/PLCG2	5
BP	GO:0035272	exocrine system development	5/337	46/18903	0.00131594	0.00506513	0.00272806	HGF/TNF/BMP7/TGFB2/FGF8	5
BP	GO:0046596	regulation of viral entry into host cell	5/337	46/18903	0.00131594	0.00506513	0.00272806	CD74/TRIM22/CIITA/CD4/PTX3	5
BP	GO:0002455	humoral immune response mediated by circulating immunoglobulin	8/337	119/18903	0.00132642	0.00508631	0.00273947	PTPRC/CR2/TNF/IGHD/FCGR2B/C3/IGKC/MBL2	8
BP	GO:0038034	signal transduction in absence of ligand	6/337	68/18903	0.00132756	0.00508631	0.00273947	KITLG/TNF/IL1B/IL7/IL1A/IL4	6
BP	GO:0043550	regulation of lipid kinase activity	6/337	68/18903	0.00132756	0.00508631	0.00273947	VAV3/TEK/CCL19/CCL21/FLT3/VAV2	6
BP	GO:0060193	positive regulation of lipase activity	6/337	68/18903	0.00132756	0.00508631	0.00273947	ITK/AGT/PTAFR/CCL5/ADCYAP1R1/AGTR1	6
BP	GO:0097192	extrinsic apoptotic signaling pathway in absence of ligand	6/337	68/18903	0.00132756	0.00508631	0.00273947	KITLG/TNF/IL1B/IL7/IL1A/IL4	6
BP	GO:0048738	cardiac muscle tissue development	12/337	241/18903	0.00135403	0.00518298	0.00279154	RARB/NRG1/AGT/IGF1/BMP2/BMP7/TGFB2/FGF9/DKK1/FGF8/WNT5A/NOX4	12
BP	GO:1904427	positive regulation of calcium ion transmembrane transport	7/337	93/18903	0.00137324	0.00524684	0.00282593	CALCR/GPER1/XCL1/HSPA2/ADCYAP1R1/PLCG2/IL13	7
BP	GO:1904705	regulation of vascular associated smooth muscle cell proliferation	7/337	93/18903	0.00137324	0.00524684	0.00282593	AGT/IGF1/TNF/GPER1/FGF9/NR4A3/ADIPOQ	7
BP	GO:0002024	diet induced thermogenesis	3/337	13/18903	0.00140649	0.00532009	0.00286538	SCTR/MC4R/SCT	3
BP	GO:0002430	complement receptor mediated signaling pathway	3/337	13/18903	0.00140649	0.00532009	0.00286538	CR2/GPR32/FPR1	3
BP	GO:0002664	regulation of T cell tolerance induction	3/337	13/18903	0.00140649	0.00532009	0.00286538	HLA-B/HLA-G/CD3E	3
BP	GO:0035745	T-helper 2 cell cytokine production	3/337	13/18903	0.00140649	0.00532009	0.00286538	XCL1/IL4/IL6	3
BP	GO:0036006	cellular response to macrophage colony-stimulating factor stimulus	3/337	13/18903	0.00140649	0.00532009	0.00286538	TLR4/CSF1/CSF1R	3
BP	GO:0042492	gamma-delta T cell differentiation	3/337	13/18903	0.00140649	0.00532009	0.00286538	PTPRC/SYK/CCR9	3
BP	GO:0043379	memory T cell differentiation	3/337	13/18903	0.00140649	0.00532009	0.00286538	HLA-DRA/IL12B/TNFSF4	3
BP	GO:0045741	positive regulation of epidermal growth factor-activated receptor activity	3/337	13/18903	0.00140649	0.00532009	0.00286538	TGFA/EGF/AREG	3
BP	GO:0070486	leukocyte aggregation	3/337	13/18903	0.00140649	0.00532009	0.00286538	IL1B/BMP7/NR4A3	3
BP	GO:2000551	regulation of T-helper 2 cell cytokine production	3/337	13/18903	0.00140649	0.00532009	0.00286538	XCL1/IL4/IL6	3
BP	GO:2001198	regulation of dendritic cell differentiation	3/337	13/18903	0.00140649	0.00532009	0.00286538	HLA-B/HLA-G/FCGR2B	3
BP	GO:0007623	circadian rhythm	11/337	210/18903	0.00142155	0.00536976	0.00289214	RORC/TNF/NR0B2/RORA/OPRL1/RORB/AGRP/PRKCG/GHRHR/LEP/ADIPOQ	11
BP	GO:0042326	negative regulation of phosphorylation	16/337	381/18903	0.0014222	0.00536976	0.00289214	HGF/PTPRC/ANGPT1/AGT/BMP2/IL1B/NTF3/BMP7/SLIT2/TNFAIP3/MAPT/DKK1/FABP4/INHA/ADIPOQ/CBLC	16
BP	GO:0048645	animal organ formation	6/337	69/18903	0.00143257	0.00540399	0.00291057	BMP2/FGF1/BMP7/DKK1/FGF8/WNT5A	6
BP	GO:2000377	regulation of reactive oxygen species metabolic process	9/337	149/18903	0.00143665	0.00541445	0.00291621	SYK/AGT/TLR4/TNF/BMP7/PLCG2/MAPT/AGTR1/LEP	9
BP	GO:0003272	endocardial cushion formation	4/337	28/18903	0.00144877	0.00542573	0.00292228	BMP2/BMP7/TGFB2/FGF8	4
BP	GO:0007190	activation of adenylate cyclase activity	4/337	28/18903	0.00144877	0.00542573	0.00292228	VIPR2/TSHR/GIPR/GHRHR	4
BP	GO:0014072	response to isoquinoline alkaloid	4/337	28/18903	0.00144877	0.00542573	0.00292228	TACR1/PCSK1/OPRK1/PRKCG	4
BP	GO:0032703	negative regulation of interleukin-2 production	4/337	28/18903	0.00144877	0.00542573	0.00292228	PTPRC/XCL1/TNFAIP3/SFTPD	4
BP	GO:0042634	regulation of hair cycle	4/337	28/18903	0.00144877	0.00542573	0.00292228	TNF/TGFB2/WNT5A/GAL	4
BP	GO:0043278	response to morphine	4/337	28/18903	0.00144877	0.00542573	0.00292228	TACR1/PCSK1/OPRK1/PRKCG	4
BP	GO:1900017	positive regulation of cytokine production involved in inflammatory response	4/337	28/18903	0.00144877	0.00542573	0.00292228	TLR4/TNF/IL17D/IL6	4
BP	GO:0061383	trabecula morphogenesis	5/337	47/18903	0.0014514	0.00543065	0.00292493	TEK/NRG1/SLC40A1/BMP7/TGFB2	5
BP	GO:0022404	molting cycle process	7/337	94/18903	0.00146151	0.00545377	0.00293739	TNF/TGFB2/TNFRSF19/DKK1/WNT5A/GAL/LGR5	7
BP	GO:0022405	hair cycle process	7/337	94/18903	0.00146151	0.00545377	0.00293739	TNF/TGFB2/TNFRSF19/DKK1/WNT5A/GAL/LGR5	7
BP	GO:0060761	negative regulation of response to cytokine stimulus	7/337	94/18903	0.00146151	0.00545377	0.00293739	PTPRC/CCL5/SLIT2/MMP12/IL1R2/IL6/ADIPOQ	7
BP	GO:0060541	respiratory system development	11/337	211/18903	0.00147646	0.0055046	0.00296476	TNF/FGF1/THRB/FGF9/MMP12/FGF8/WNT5A/SFTPD/PGR/NODAL/IL13	11
BP	GO:0035265	organ growth	10/337	180/18903	0.00149796	0.00557978	0.00300525	RARB/PRLR/AGT/IGF1/IL7/TGFB2/FGF9/NPPC/FGF8/LEP	10
BP	GO:0034614	cellular response to reactive oxygen species	9/337	150/18903	0.00150495	0.0056008	0.00301657	HGF/MET/BTK/BMP7/TNFAIP3/MAPT/NR4A3/MPO/IL6	9
BP	GO:0098773	skin epidermis development	7/337	95/18903	0.00155415	0.00577354	0.00310961	TNF/TGFB2/TNFRSF19/DKK1/WNT5A/GAL/LGR5	7
BP	GO:1990874	vascular associated smooth muscle cell proliferation	7/337	95/18903	0.00155415	0.00577354	0.00310961	AGT/IGF1/TNF/GPER1/FGF9/NR4A3/ADIPOQ	7
BP	GO:0043409	negative regulation of MAPK cascade	10/337	181/18903	0.00156111	0.00579424	0.00312076	PTPRC/AGT/TLR4/SEMA6A/BMP2/IL1B/GPER1/BMP7/ADIPOQ/CBLC	10
BP	GO:0051962	positive regulation of nervous system development	13/337	279/18903	0.00157673	0.00584699	0.00314917	CX3CR1/IL33/TNF/BMP2/IL1B/GPER1/SLIT2/NR2E1/PTN/MAPT/BDNF/IL6/IL34	13
BP	GO:0032892	positive regulation of organic acid transport	5/337	48/18903	0.00159685	0.00590579	0.00318084	FABP3/AGT/IL1B/IL1A/TRH	5
BP	GO:0032924	activin receptor signaling pathway	5/337	48/18903	0.00159685	0.00590579	0.00318084	ACVR1C/AMHR2/FGF9/GDF2/NODAL	5
BP	GO:0071825	protein-lipid complex subunit organization	5/337	48/18903	0.00159685	0.00590579	0.00318084	CETP/AGT/MPO/AGTR1/PLTP	5
BP	GO:0030282	bone mineralization	8/337	123/18903	0.00163861	0.00605484	0.00326112	IGF1/LTF/BMP2/BMPR1B/BMP7/BMP6/PTN/LEP	8
BP	GO:0071322	cellular response to carbohydrate stimulus	9/337	152/18903	0.0016494	0.0060893	0.00327968	PPARD/COLEC12/CMA1/GPER1/OPRK1/NOX4/FGF21/GHRHR/LEP	9
BP	GO:0003073	regulation of systemic arterial blood pressure	7/337	96/18903	0.00165129	0.00609088	0.00328053	AGT/CTSG/TNF/TACR1/CMA1/ADM2/AGTR1	7
BP	GO:0010800	positive regulation of peptidyl-threonine phosphorylation	4/337	29/18903	0.00165722	0.0060965	0.00328356	EGF/BMP7/WNT5A/AZU1	4
BP	GO:0070977	bone maturation	4/337	29/18903	0.00165722	0.0060965	0.00328356	IGF1/LTF/BMP2/LEP	4
BP	GO:0090025	regulation of monocyte chemotaxis	4/337	29/18903	0.00165722	0.0060965	0.00328356	CX3CR1/TNFSF18/CCL5/SLIT2	4
BP	GO:0032715	negative regulation of interleukin-6 production	6/337	71/18903	0.00166148	0.00610677	0.00328909	HGF/INPP5D/TLR4/TNF/ORM1/TNFAIP3	6
BP	GO:0042593	glucose homeostasis	12/337	248/18903	0.00172395	0.00632934	0.00340896	PPARD/CMA1/GPER1/OPRK1/VGF/NOX4/FGF21/IL6/GHRHR/LEP/ADIPOQ/GCGR	12
BP	GO:0072089	stem cell proliferation	8/337	124/18903	0.00172508	0.00632934	0.00340896	RARB/PTPRC/KITLG/THPO/NR2E1/FGF9/FGF8/WNT5A	8
BP	GO:0003044	regulation of systemic arterial blood pressure mediated by a chemical signal	5/337	49/18903	0.00175273	0.00641383	0.00345447	AGT/CTSG/TACR1/CMA1/AGTR1	5
BP	GO:0031281	positive regulation of cyclase activity	5/337	49/18903	0.00175273	0.00641383	0.00345447	VIPR2/GUCA2A/TSHR/GIPR/GHRHR	5
BP	GO:2000404	regulation of T cell migration	5/337	49/18903	0.00175273	0.00641383	0.00345447	XCL1/CCL21/CCL5/APOD/WNT5A	5
BP	GO:0042117	monocyte activation	3/337	14/18903	0.00176656	0.00644174	0.0034695	NPY/CSF1/AZU1	3
BP	GO:0044849	estrous cycle	3/337	14/18903	0.00176656	0.00644174	0.0034695	OPRK1/OPRL1/PTN	3
BP	GO:0072540	T-helper 17 cell lineage commitment	3/337	14/18903	0.00176656	0.00644174	0.0034695	TNFSF18/IL12B/IL6	3
BP	GO:0090715	immunological memory formation process	3/337	14/18903	0.00176656	0.00644174	0.0034695	HLA-DRA/IL12B/TNFSF4	3
BP	GO:0033500	carbohydrate homeostasis	12/337	249/18903	0.00178301	0.00649602	0.00349874	PPARD/CMA1/GPER1/OPRK1/VGF/NOX4/FGF21/IL6/GHRHR/LEP/ADIPOQ/GCGR	12
BP	GO:0060411	cardiac septum morphogenesis	6/337	72/18903	0.00178585	0.00650067	0.00350124	NRP2/BMP7/TGFB2/SLIT2/FGF8/WNT5A	6
BP	GO:0043547	positive regulation of GTPase activity	13/337	283/18903	0.00178847	0.00650451	0.00350331	CCL17/CCL2/CCL7/CCL19/CCL11/XCL1/CCL21/CCL5/NTF3/PRTN3/CCL22/WNT5A/CCL18	13
BP	GO:0001952	regulation of cell-matrix adhesion	8/337	125/18903	0.00181511	0.00658414	0.0035462	SDC4/TEK/CSF1/SEMA3E/CD3E/CCL21/APOD/MMP12	8
BP	GO:0010811	positive regulation of cell-substrate adhesion	8/337	125/18903	0.00181511	0.00658414	0.0035462	SDC4/TEK/NPY/CSF1/CD3E/CCL21/FGA/RAC3	8
BP	GO:0043280	positive regulation of cysteine-type endopeptidase activity involved in apoptotic process	8/337	125/18903	0.00181511	0.00658414	0.0035462	SYK/TNF/ACVR1C/GPER1/FASLG/LCK/MAPT/NODAL	8
BP	GO:0002040	sprouting angiogenesis	10/337	185/18903	0.00183568	0.00665296	0.00358326	TEK/ANGPT1/SEMA6A/FGF1/SEMA3E/IL12B/SLIT2/NR2E1/PGF/AGTR1	10
BP	GO:0019058	viral life cycle	14/337	319/18903	0.00185256	0.00670825	0.00361304	SLPI/CD74/TRIM22/CIITA/CCL2/CCR5/LTF/CR2/CXCR6/TNF/CD4/CCL5/PTX3/AGTR1	14
BP	GO:0002360	T cell lineage commitment	4/337	30/18903	0.00188561	0.00679832	0.00366155	TNFSF18/IL7/IL12B/IL6	4
BP	GO:0007176	regulation of epidermal growth factor-activated receptor activity	4/337	30/18903	0.00188561	0.00679832	0.00366155	TGFA/EGF/AREG/CBLC	4
BP	GO:0043032	positive regulation of macrophage activation	4/337	30/18903	0.00188561	0.00679832	0.00366155	IL33/TLR4/WNT5A/IL13	4
BP	GO:0045940	positive regulation of steroid metabolic process	4/337	30/18903	0.00188561	0.00679832	0.00366155	TNF/FGF1/IL1A/BMP6	4
BP	GO:0070498	interleukin-1-mediated signaling pathway	4/337	30/18903	0.00188561	0.00679832	0.00366155	IL1B/IL1R2/IL6/IL1RL2	4
BP	GO:0032964	collagen biosynthetic process	5/337	50/18903	0.00191948	0.00689058	0.00371125	PPARD/CIITA/NPPC/VIM/IL6	5
BP	GO:0038084	vascular endothelial growth factor signaling pathway	5/337	50/18903	0.00191948	0.00689058	0.00371125	NRP2/SEMA6A/IL12B/FLT3/PGF	5
BP	GO:0051349	positive regulation of lyase activity	5/337	50/18903	0.00191948	0.00689058	0.00371125	VIPR2/GUCA2A/TSHR/GIPR/GHRHR	5
BP	GO:1904707	positive regulation of vascular associated smooth muscle cell proliferation	5/337	50/18903	0.00191948	0.00689058	0.00371125	AGT/IGF1/TNF/FGF9/NR4A3	5
BP	GO:2001238	positive regulation of extrinsic apoptotic signaling pathway	5/337	50/18903	0.00191948	0.00689058	0.00371125	PTPRC/AGT/TNF/BMPR1B/GPER1	5
BP	GO:0010951	negative regulation of endopeptidase activity	12/337	252/18903	0.00197023	0.00706664	0.00380607	SLPI/HGF/A2M/AGT/LTF/TNF/C3/WFDC2/SERPIND1/WFIKKN1/BIRC5/LCN1	12
BP	GO:0050688	regulation of defense response to virus	6/337	74/18903	0.00205562	0.00736023	0.0039642	MICB/IL1B/IL12B/TNFAIP3/MMP12/IL4	6
BP	GO:2000628	regulation of miRNA metabolic process	6/337	74/18903	0.00205562	0.00736023	0.0039642	PPARD/TNF/BMP2/TGFB2/NFATC4/PRL	6
BP	GO:1903169	regulation of calcium ion transmembrane transport	10/337	188/18903	0.00206622	0.0073918	0.0039812	PIK3CG/CALCR/GPER1/XCL1/HSPA2/ADCYAP1R1/OPRL1/PLCG2/EPO/IL13	10
BP	GO:0008202	steroid metabolic process	14/337	323/18903	0.00207785	0.00742702	0.00400017	PPARD/CETP/PRLR/RORC/TNF/BMP2/FGF1/NR0B2/IL1A/BMP6/RORA/GAL/IL4/LEP	14
BP	GO:0050873	brown fat cell differentiation	5/337	51/18903	0.00209754	0.00746531	0.00402079	FABP3/BMP7/FABP4/LEP/ADIPOQ	5
BP	GO:0060688	regulation of morphogenesis of a branching structure	5/337	51/18903	0.00209754	0.00746531	0.00402079	HGF/AGT/TNF/BMP7/WNT5A	5
BP	GO:0097720	calcineurin-mediated signaling	5/337	51/18903	0.00209754	0.00746531	0.00402079	NRG1/IGF1/TNF/NFATC4/PLCG2	5
BP	GO:1903307	positive regulation of regulated secretory pathway	5/337	51/18903	0.00209754	0.00746531	0.00402079	HLA-F/SYK/PTAFR/IL4/IL13	5
BP	GO:1903793	positive regulation of anion transport	5/337	51/18903	0.00209754	0.00746531	0.00402079	AGT/PTAFR/IL1B/IL1A/TRH	5
BP	GO:0010039	response to iron ion	4/337	31/18903	0.0021349	0.00757879	0.00408191	B2M/SLC40A1/BMP6/TFR2	4
BP	GO:1900745	positive regulation of p38MAPK cascade	4/337	31/18903	0.0021349	0.00757879	0.00408191	BMP2/IL1B/OPRK1/LEP	4
BP	GO:2000316	regulation of T-helper 17 type immune response	4/337	31/18903	0.0021349	0.00757879	0.00408191	TNFSF18/IL12B/IL4/PRKCQ	4
BP	GO:0010038	response to metal ion	15/337	360/18903	0.00213938	0.00758823	0.004087	B2M/SLC40A1/CYBB/CD14/PCSK1/FGA/IL1A/BMP6/TFR2/NFATC4/PLCG2/MAPT/WNT5A/GIPR/FABP4	15
BP	GO:0001787	natural killer cell proliferation	3/337	15/18903	0.00217921	0.00766411	0.00412786	HLA-E/IL12B/LEP	3
BP	GO:0002517	T cell tolerance induction	3/337	15/18903	0.00217921	0.00766411	0.00412786	HLA-B/HLA-G/CD3E	3
BP	GO:0033008	positive regulation of mast cell activation involved in immune response	3/337	15/18903	0.00217921	0.00766411	0.00412786	SYK/IL4/IL13	3
BP	GO:0042074	cell migration involved in gastrulation	3/337	15/18903	0.00217921	0.00766411	0.00412786	FGF8/WNT5A/NODAL	3
BP	GO:0043306	positive regulation of mast cell degranulation	3/337	15/18903	0.00217921	0.00766411	0.00412786	SYK/IL4/IL13	3
BP	GO:0048820	hair follicle maturation	3/337	15/18903	0.00217921	0.00766411	0.00412786	TGFB2/WNT5A/GAL	3
BP	GO:0051956	negative regulation of amino acid transport	3/337	15/18903	0.00217921	0.00766411	0.00412786	TNF/TRH/LEP	3
BP	GO:0070234	positive regulation of T cell apoptotic process	3/337	15/18903	0.00217921	0.00766411	0.00412786	PDCD1/CCL5/WNT5A	3
BP	GO:0071639	positive regulation of monocyte chemotactic protein-1 production	3/337	15/18903	0.00217921	0.00766411	0.00412786	SYK/IL1B/ADIPOQ	3
BP	GO:0097531	mast cell migration	3/337	15/18903	0.00217921	0.00766411	0.00412786	KITLG/CCL11/PGF	3
BP	GO:0046323	glucose import	6/337	75/18903	0.00220153	0.00772951	0.00416309	SORT1/IGF1/TNF/FGF21/LEP/ADIPOQ	6
BP	GO:0050810	regulation of steroid biosynthetic process	6/337	75/18903	0.00220153	0.00772951	0.00416309	TNF/BMP2/FGF1/IL1A/BMP6/LEP	6
BP	GO:0010810	regulation of cell-substrate adhesion	11/337	222/18903	0.00220361	0.00773028	0.00416351	SDC4/TEK/NPY/CSF1/SEMA3E/CD3E/CCL21/FGA/APOD/MMP12/RAC3	11
BP	GO:0021872	forebrain generation of neurons	5/337	52/18903	0.00228735	0.00801055	0.00431446	B2M/NRP2/CSF1R/SEMA3E/NR2E1	5
BP	GO:0060612	adipose tissue development	5/337	52/18903	0.00228735	0.00801055	0.00431446	PPARD/RORC/CSF1/LEP/UMODL1	5
BP	GO:0014706	striated muscle tissue development	12/337	257/18903	0.00231791	0.00811075	0.00436843	RARB/NRG1/AGT/IGF1/BMP2/BMP7/TGFB2/FGF9/DKK1/FGF8/WNT5A/NOX4	12
BP	GO:0045685	regulation of glial cell differentiation	6/337	76/18903	0.0023551	0.00823394	0.00443478	IL33/BMP2/NR2E1/PTN/IL6/IL34	6
BP	GO:0002862	negative regulation of inflammatory response to antigenic stimulus	4/337	32/18903	0.00240602	0.00839081	0.00451926	SYK/NPY/IL12B/FCGR2B	4
BP	GO:0045671	negative regulation of osteoclast differentiation	4/337	32/18903	0.00240602	0.00839081	0.00451926	INPP5D/TLR4/LTF/IL4	4
BP	GO:0061384	heart trabecula morphogenesis	4/337	32/18903	0.00240602	0.00839081	0.00451926	TEK/NRG1/BMP7/TGFB2	4
BP	GO:0031334	positive regulation of protein-containing complex assembly	10/337	192/18903	0.00240932	0.00839526	0.00452166	MET/SYK/NRG1/TLR4/TNF/CCL11/CCL21/PLCG2/MAPT/CSF3	10
BP	GO:0006910	phagocytosis, recognition	7/337	103/18903	0.00247026	0.00860041	0.00463215	COLEC12/IGHD/COLEC10/IGKC/FCN2/PTX3/MBL2	7
BP	GO:0048146	positive regulation of fibroblast proliferation	5/337	53/18903	0.00248936	0.0086524	0.00466015	CD74/AGT/IGF1/WNT5A/IL13	5
BP	GO:0052372	modulation by symbiont of entry into host	5/337	53/18903	0.00248936	0.0086524	0.00466015	CD74/TRIM22/CIITA/CD4/PTX3	5
BP	GO:0032720	negative regulation of tumor necrosis factor production	6/337	77/18903	0.0025166	0.00873978	0.00470722	TLR4/IGF1/ORM1/TNFAIP3/IL4/ADIPOQ	6
BP	GO:0000041	transition metal ion transport	7/337	104/18903	0.00260898	0.00905302	0.00487593	B2M/SLC40A1/LCN2/LTF/TFR2/SLC22A17/SLC11A1	7
BP	GO:0021984	adenohypophysis development	3/337	16/18903	0.00264693	0.00913135	0.00491811	BMP2/FGF8/GHRHR	3
BP	GO:0032095	regulation of response to food	3/337	16/18903	0.00264693	0.00913135	0.00491811	NPY/PRKCG/LEP	3
BP	GO:0034112	positive regulation of homotypic cell-cell adhesion	3/337	16/18903	0.00264693	0.00913135	0.00491811	CTSG/CCL5/IL6	3
BP	GO:0045651	positive regulation of macrophage differentiation	3/337	16/18903	0.00264693	0.00913135	0.00491811	PRKCA/CSF1/IL34	3
BP	GO:0045779	negative regulation of bone resorption	3/337	16/18903	0.00264693	0.00913135	0.00491811	INPP5D/TNFAIP3/IL6	3
BP	GO:0060456	positive regulation of digestive system process	3/337	16/18903	0.00264693	0.00913135	0.00491811	TACR1/SCT/OPRL1	3
BP	GO:1902033	regulation of hematopoietic stem cell proliferation	3/337	16/18903	0.00264693	0.00913135	0.00491811	KITLG/THPO/WNT5A	3
BP	GO:0045913	positive regulation of carbohydrate metabolic process	6/337	78/18903	0.00268628	0.00925942	0.0049871	EGF/IGF1/CD244/PTAFR/GPER1/ADCYAP1R1	6
BP	GO:0021772	olfactory bulb development	4/337	33/18903	0.00269992	0.00927568	0.00499585	CSF1R/SLIT2/NR2E1/WNT5A	4
BP	GO:0048799	animal organ maturation	4/337	33/18903	0.00269992	0.00927568	0.00499585	IGF1/LTF/BMP2/LEP	4
BP	GO:0098801	regulation of renal system process	4/337	33/18903	0.00269992	0.00927568	0.00499585	AGT/TACR1/AGTR1/ADIPOQ	4
BP	GO:2000191	regulation of fatty acid transport	4/337	33/18903	0.00269992	0.00927568	0.00499585	FABP3/SYK/IL1B/IL1A	4
BP	GO:0010883	regulation of lipid storage	5/337	54/18903	0.00270401	0.00928037	0.00499838	PPARD/TNF/C3/IL6/LEP	5
BP	GO:0006887	exocytosis	15/337	369/18903	0.00270575	0.00928037	0.00499838	HLA-F/PIK3CG/BTK/SYK/SDC4/PTGDR/PTAFR/CCL5/FCGR2B/FGA/NR4A3/PRKCG/IL4/IL13/GCGR	15
BP	GO:0045664	regulation of neuron differentiation	10/337	196/18903	0.00279675	0.00957883	0.00515913	B2M/BMP2/NTF3/BMP7/BMP6/NR2E1/DKK1/RAC3/EPO/BDNF	10
BP	GO:0010466	negative regulation of peptidase activity	12/337	263/18903	0.00279968	0.00957883	0.00515913	SLPI/HGF/A2M/AGT/LTF/TNF/C3/WFDC2/SERPIND1/WFIKKN1/BIRC5/LCN1	12
BP	GO:1903522	regulation of blood circulation	12/337	263/18903	0.00279968	0.00957883	0.00515913	CYSLTR1/PIK3CG/AGT/KCNH2/TNF/TACR1/THRB/FGA/TGFB2/ADM2/AGTR1/LEP	12
BP	GO:0022600	digestive system process	7/337	106/18903	0.00290429	0.00992858	0.0053475	FABP2/TLR4/TACR1/OPRK1/SCT/OPRL1/LEP	7
BP	GO:0051098	regulation of binding	15/337	372/18903	0.00292007	0.0099743	0.00537212	SLPI/B2M/MET/EGF/ANGPT1/IGF1/BMP2/GREM2/NFATC4/DKK1/CSF3/WNT5A/WFIKKN1/BDNF/ADIPOQ	15
BP	GO:0002686	negative regulation of leukocyte migration	5/337	55/18903	0.00293174	0.00998956	0.00538035	IL33/CCL2/CCL21/APOD/SLIT2	5
BP	GO:0043647	inositol phosphate metabolic process	5/337	55/18903	0.00293174	0.00998956	0.00538035	CD244/PTAFR/GPER1/ADCYAP1R1/PLCG2	5
BP	GO:0072132	mesenchyme morphogenesis	5/337	55/18903	0.00293174	0.00998956	0.00538035	BMP2/BMP7/TGFB2/FGF8/WNT5A	5
BP	GO:0035270	endocrine system development	8/337	135/18903	0.00293485	0.00999195	0.00538163	BMP2/PCSK1/BMP6/FGF8/WNT5A/GIPR/IL6/GHRHR	8
BP	GO:0090322	regulation of superoxide metabolic process	4/337	34/18903	0.0030175	0.0102566	0.00552415	SYK/AGT/BMP7/MAPT	4
BP	GO:1905207	regulation of cardiocyte differentiation	4/337	34/18903	0.0030175	0.0102566	0.00552415	BMP2/GPER1/TGFB2/DKK1	4
BP	GO:0003151	outflow tract morphogenesis	6/337	80/18903	0.0030512	0.0103626	0.00558126	NRP2/BMP7/TGFB2/FGF8/WNT5A/ELN	6
BP	GO:0010565	regulation of cellular ketone metabolic process	8/337	136/18903	0.00307116	0.0104134	0.00560862	FABP3/PPARD/CD74/BMP2/IL1B/BMP6/NR4A3/ADIPOQ	8
BP	GO:0043401	steroid hormone mediated signaling pathway	8/337	136/18903	0.00307116	0.0104134	0.00560862	PPARD/GPER1/BMP7/NR2E1/NR4A3/PGR/NODAL/GHRHR	8
BP	GO:0003205	cardiac chamber development	9/337	167/18903	0.00312231	0.0105782	0.00569738	TEK/NRG1/NRP2/BMP2/BMP7/TGFB2/SLIT2/FGF8/WNT5A	9
BP	GO:0001933	negative regulation of protein phosphorylation	14/337	338/18903	0.00313442	0.0106106	0.00571482	HGF/PTPRC/ANGPT1/AGT/BMP2/IL1B/NTF3/BMP7/SLIT2/TNFAIP3/DKK1/FABP4/ADIPOQ/CBLC	14
BP	GO:0002921	negative regulation of humoral immune response	3/337	17/18903	0.00317201	0.0106545	0.00573846	A2M/CR2/FCGR2B	3
BP	GO:0016045	detection of bacterium	3/337	17/18903	0.00317201	0.0106545	0.00573846	HLA-B/HLA-A/DMBT1	3
BP	GO:0031649	heat generation	3/337	17/18903	0.00317201	0.0106545	0.00573846	TNF/IL1B/IL1A	3
BP	GO:0032274	gonadotropin secretion	3/337	17/18903	0.00317201	0.0106545	0.00573846	OPRK1/INHA/LEP	3
BP	GO:0042481	regulation of odontogenesis	3/337	17/18903	0.00317201	0.0106545	0.00573846	CSF1/BMP2/FGF8	3
BP	GO:0090713	immunological memory process	3/337	17/18903	0.00317201	0.0106545	0.00573846	HLA-DRA/IL12B/TNFSF4	3
BP	GO:1904948	midbrain dopaminergic neuron differentiation	3/337	17/18903	0.00317201	0.0106545	0.00573846	NR4A2/DKK1/WNT5A	3
BP	GO:0001954	positive regulation of cell-matrix adhesion	5/337	56/18903	0.00317302	0.0106545	0.00573846	SDC4/TEK/CSF1/CD3E/CCL21	5
BP	GO:0010676	positive regulation of cellular carbohydrate metabolic process	5/337	56/18903	0.00317302	0.0106545	0.00573846	IGF1/CD244/PTAFR/GPER1/ADCYAP1R1	5
BP	GO:0010718	positive regulation of epithelial to mesenchymal transition	5/337	56/18903	0.00317302	0.0106545	0.00573846	BMP2/IL1B/BMP7/TGFB2/IL6	5
BP	GO:0060348	bone development	11/337	233/18903	0.00319789	0.0107293	0.00577878	RARB/PTPRC/IGF1/LTF/BMP2/BMPR1B/THPO/BMP6/NPPC/FGF8/LEP	11
BP	GO:0032526	response to retinoic acid	7/337	108/18903	0.00322456	0.0108014	0.00581758	TNF/MICB/BMP6/RORB/DKK1/WNT5A/LEP	7
BP	GO:0051341	regulation of oxidoreductase activity	7/337	108/18903	0.00322456	0.0108014	0.00581758	AGT/TNF/IL1B/IL1A/AGTR1/IL13/LEP	7
BP	GO:0021988	olfactory lobe development	4/337	35/18903	0.00335967	0.0111998	0.00603218	CSF1R/SLIT2/NR2E1/WNT5A	4
BP	GO:0045762	positive regulation of adenylate cyclase activity	4/337	35/18903	0.00335967	0.0111998	0.00603218	VIPR2/TSHR/GIPR/GHRHR	4
BP	GO:1901099	negative regulation of signal transduction in absence of ligand	4/337	35/18903	0.00335967	0.0111998	0.00603218	TNF/IL1B/IL7/IL1A	4
BP	GO:2000406	positive regulation of T cell migration	4/337	35/18903	0.00335967	0.0111998	0.00603218	XCL1/CCL21/CCL5/WNT5A	4
BP	GO:2000515	negative regulation of CD4-positive, alpha-beta T cell activation	4/337	35/18903	0.00335967	0.0111998	0.00603218	TNFSF18/XCL1/TNFSF4/IL4	4
BP	GO:2001240	negative regulation of extrinsic apoptotic signaling pathway in absence of ligand	4/337	35/18903	0.00335967	0.0111998	0.00603218	TNF/IL1B/IL7/IL1A	4
BP	GO:0001837	epithelial to mesenchymal transition	9/337	169/18903	0.00337913	0.0112557	0.00606226	HGF/IGF1/BMP2/IL1B/BMP7/TGFB2/FGF8/WNT5A/IL6	9
BP	GO:2000116	regulation of cysteine-type endopeptidase activity	11/337	235/18903	0.00341235	0.0113572	0.00611696	HGF/SYK/LTF/TNF/ACVR1C/GPER1/FASLG/LCK/MAPT/BIRC5/NODAL	11
BP	GO:0038066	p38MAPK cascade	5/337	57/18903	0.00342827	0.0113919	0.00613567	HGF/BMP2/IL1B/OPRK1/LEP	5
BP	GO:0070231	T cell apoptotic process	5/337	57/18903	0.00342827	0.0113919	0.00613567	PDCD1/FASLG/CCL5/WNT5A/PRKCQ	5
BP	GO:0031016	pancreas development	6/337	82/18903	0.00345191	0.0114613	0.00617304	MET/PCSK1/BMP6/WNT5A/GIPR/IL6	6
BP	GO:0003158	endothelium development	8/337	139/18903	0.00350984	0.0116444	0.00627162	MET/NRG1/SLC40A1/TNF/FGF1/IL1B/BMP6/GDF2	8
BP	GO:0050806	positive regulation of synaptic transmission	9/337	170/18903	0.00351363	0.0116477	0.00627339	CX3CR1/CCL2/TNF/TACR1/GPER1/NR2E1/NFATC4/PTN/PRKCG	9
BP	GO:0071560	cellular response to transforming growth factor beta stimulus	12/337	271/18903	0.00356551	0.0118102	0.00636095	CX3CR1/BMP2/AMHR2/XCL1/GDF10/TGFB2/LEFTY1/LTBP1/WNT5A/WFIKKN1/IL4/NODAL	12
BP	GO:0007173	epidermal growth factor receptor signaling pathway	7/337	110/18903	0.00357111	0.0118194	0.00636587	TGFA/EGF/AGT/GPER1/FASLG/AREG/CBLC	7
BP	GO:0051701	biological process involved in interaction with host	10/337	203/18903	0.00359341	0.0118837	0.00640053	CD74/TRIM22/CIITA/CCR5/LTF/CR2/CD4/PTX3/SFTPD/AGTR1	10
BP	GO:0046661	male sex differentiation	9/337	171/18903	0.00365229	0.0120688	0.00650023	KITLG/AMHR2/IL1A/BMP6/TGFB2/FGF9/FGF8/WNT5A/INHA	9
BP	GO:0030500	regulation of bone mineralization	6/337	83/18903	0.00366635	0.0120865	0.00650975	LTF/BMP2/BMPR1B/BMP7/BMP6/PTN	6
BP	GO:0042310	vasoconstriction	6/337	83/18903	0.00366635	0.0120865	0.00650975	CYSLTR1/AGT/TACR1/FGA/AGTR1/LEP	6
BP	GO:0071326	cellular response to monosaccharide stimulus	8/337	140/18903	0.00366636	0.0120865	0.00650975	PPARD/CMA1/GPER1/OPRK1/NOX4/FGF21/GHRHR/LEP	8
BP	GO:0001961	positive regulation of cytokine-mediated signaling pathway	5/337	58/18903	0.00369796	0.0121243	0.0065301	CD74/CSF1/IL7/MMP12/WNT5A	5
BP	GO:0033619	membrane protein proteolysis	5/337	58/18903	0.00369796	0.0121243	0.0065301	TNF/IL1B/PRTN3/TMPRSS6/PRKCQ	5
BP	GO:0045620	negative regulation of lymphocyte differentiation	5/337	58/18903	0.00369796	0.0121243	0.0065301	CD74/TNFSF18/TNFSF4/IL4/INHA	5
BP	GO:0048016	inositol phosphate-mediated signaling	5/337	58/18903	0.00369796	0.0121243	0.0065301	NRG1/IGF1/TNF/NFATC4/PLCG2	5
BP	GO:1901888	regulation of cell junction assembly	10/337	204/18903	0.00372059	0.0121243	0.0065301	SDC4/TEK/AGT/TNF/IL1B/APOD/SLIT1/DKK1/WNT5A/BDNF	10
BP	GO:0001569	branching involved in blood vessel morphogenesis	4/337	36/18903	0.00372731	0.0121243	0.0065301	SEMA3E/NFATC4/GDF2/FGF8	4
BP	GO:0010613	positive regulation of cardiac muscle hypertrophy	4/337	36/18903	0.00372731	0.0121243	0.0065301	PRKCA/AGT/IGF1/NR4A3	4
BP	GO:0016486	peptide hormone processing	4/337	36/18903	0.00372731	0.0121243	0.0065301	PCSK2/CTSG/CMA1/PCSK1	4
BP	GO:0045589	regulation of regulatory T cell differentiation	4/337	36/18903	0.00372731	0.0121243	0.0065301	HLA-DRA/HLA-G/IL2RG/TNFSF4	4
BP	GO:0002295	T-helper cell lineage commitment	3/337	18/18903	0.00375657	0.0121243	0.0065301	TNFSF18/IL12B/IL6	3
BP	GO:0003128	heart field specification	3/337	18/18903	0.00375657	0.0121243	0.0065301	BMP2/DKK1/WNT5A	3
BP	GO:0032310	prostaglandin secretion	3/337	18/18903	0.00375657	0.0121243	0.0065301	IL1B/IL1A/LEP	3
BP	GO:0034138	toll-like receptor 3 signaling pathway	3/337	18/18903	0.00375657	0.0121243	0.0065301	TNF/COLEC12/TNFAIP3	3
BP	GO:0035234	ectopic germ cell programmed cell death	3/337	18/18903	0.00375657	0.0121243	0.0065301	KITLG/IL1B/IL1A	3
BP	GO:0042753	positive regulation of circadian rhythm	3/337	18/18903	0.00375657	0.0121243	0.0065301	RORC/RORA/GHRHR	3
BP	GO:0043117	positive regulation of vascular permeability	3/337	18/18903	0.00375657	0.0121243	0.0065301	ANGPT1/TACR1/BMP6	3
BP	GO:0044320	cellular response to leptin stimulus	3/337	18/18903	0.00375657	0.0121243	0.0065301	EBI3/NR4A3/LEP	3
BP	GO:0045623	negative regulation of T-helper cell differentiation	3/337	18/18903	0.00375657	0.0121243	0.0065301	TNFSF18/TNFSF4/IL4	3
BP	GO:0045780	positive regulation of bone resorption	3/337	18/18903	0.00375657	0.0121243	0.0065301	SYK/PRKCA/MC4R	3
BP	GO:0046851	negative regulation of bone remodeling	3/337	18/18903	0.00375657	0.0121243	0.0065301	INPP5D/TNFAIP3/IL6	3
BP	GO:0051770	positive regulation of nitric-oxide synthase biosynthetic process	3/337	18/18903	0.00375657	0.0121243	0.0065301	IL33/CCL2/TLR4	3
BP	GO:0060391	positive regulation of SMAD protein signal transduction	3/337	18/18903	0.00375657	0.0121243	0.0065301	BMP2/BMP6/NODAL	3
BP	GO:0060602	branch elongation of an epithelium	3/337	18/18903	0.00375657	0.0121243	0.0065301	FGF1/WNT5A/AREG	3
BP	GO:0070230	positive regulation of lymphocyte apoptotic process	3/337	18/18903	0.00375657	0.0121243	0.0065301	PDCD1/CCL5/WNT5A	3
BP	GO:0072567	chemokine (C-X-C motif) ligand 2 production	3/337	18/18903	0.00375657	0.0121243	0.0065301	CD74/TLR4/TNF	3
BP	GO:0150079	negative regulation of neuroinflammatory response	3/337	18/18903	0.00375657	0.0121243	0.0065301	PTPRC/IGF1/IL4	3
BP	GO:2000341	regulation of chemokine (C-X-C motif) ligand 2 production	3/337	18/18903	0.00375657	0.0121243	0.0065301	CD74/TLR4/TNF	3
BP	GO:0044089	positive regulation of cellular component biogenesis	18/337	498/18903	0.00377832	0.012185	0.00656281	MET/SYK/SDC4/TEK/PRKCA/NRG1/CCL19/AGT/TLR4/TNF/TACR1/CCL11/CCL21/BMP7/PLCG2/MAPT/CSF3/BDNF	18
BP	GO:0016032	viral process	16/337	421/18903	0.00383322	0.0123525	0.00665301	SLPI/CD74/TRIM22/CIITA/CCL2/CCR5/LTF/CR2/CXCR6/TNF/CSF1R/CD4/CCL5/PTX3/AGTR1/MBL2	16
BP	GO:0043281	regulation of cysteine-type endopeptidase activity involved in apoptotic process	10/337	205/18903	0.00385131	0.0124012	0.00667923	HGF/SYK/TNF/ACVR1C/GPER1/FASLG/LCK/MAPT/BIRC5/NODAL	10
BP	GO:0051851	modulation by host of symbiont process	6/337	84/18903	0.00389051	0.0125177	0.00674199	CX3CR1/LTF/CSF1R/CCL5/PTX3/SFTPD	6
BP	GO:0046324	regulation of glucose import	5/337	59/18903	0.00398251	0.0128038	0.00689608	IGF1/TNF/FGF21/LEP/ADIPOQ	5
BP	GO:0010950	positive regulation of endopeptidase activity	9/337	174/18903	0.0040942	0.0131425	0.00707852	SEMG1/SYK/TNF/ACVR1C/GPER1/FASLG/LCK/MAPT/NODAL	9
BP	GO:0031214	biomineral tissue development	9/337	174/18903	0.0040942	0.0131425	0.00707852	IGF1/LTF/BMP2/BMPR1B/HTN3/BMP7/BMP6/PTN/LEP	9
BP	GO:0002068	glandular epithelial cell development	4/337	37/18903	0.0041213	0.0131761	0.00709658	RARB/BMP6/WNT5A/PGR	4
BP	GO:0002335	mature B cell differentiation	4/337	37/18903	0.0041213	0.0131761	0.00709658	IL2RG/FCGR2B/PLCG2/IL6	4
BP	GO:0014742	positive regulation of muscle hypertrophy	4/337	37/18903	0.0041213	0.0131761	0.00709658	PRKCA/AGT/IGF1/NR4A3	4
BP	GO:0038179	neurotrophin signaling pathway	4/337	37/18903	0.0041213	0.0131761	0.00709658	SORT1/AGT/NTF3/BDNF	4
BP	GO:0070229	negative regulation of lymphocyte apoptotic process	4/337	37/18903	0.0041213	0.0131761	0.00709658	CD74/PDCD1/CCL5/PRKCQ	4
BP	GO:0048167	regulation of synaptic plasticity	10/337	207/18903	0.00412366	0.0131761	0.00709658	CX3CR1/AGT/SCTR/SCT/VGF/NR2E1/NFATC4/PTN/MAPT/PRKCG	10
BP	GO:2001056	positive regulation of cysteine-type endopeptidase activity	8/337	143/18903	0.00416852	0.0133092	0.00716828	SYK/TNF/ACVR1C/GPER1/FASLG/LCK/MAPT/NODAL	8
BP	GO:0071559	response to transforming growth factor beta	12/337	277/18903	0.0042442	0.0135404	0.00729281	CX3CR1/BMP2/AMHR2/XCL1/GDF10/TGFB2/LEFTY1/LTBP1/WNT5A/WFIKKN1/IL4/NODAL	12
BP	GO:0045055	regulated exocytosis	11/337	242/18903	0.00425545	0.0135659	0.00730654	HLA-F/PIK3CG/BTK/SYK/PTGDR/PTAFR/FCGR2B/NR4A3/PRKCG/IL4/IL13	11
BP	GO:0030177	positive regulation of Wnt signaling pathway	8/337	144/18903	0.00434717	0.0138476	0.0074583	EGF/LGR6/BMP2/TNFAIP3/FGF9/DKK1/WNT5A/LGR5	8
BP	GO:0010744	positive regulation of macrophage derived foam cell differentiation	3/337	19/18903	0.00440258	0.0139493	0.00751307	AGT/CSF1/AGTR1	3
BP	GO:0030889	negative regulation of B cell proliferation	3/337	19/18903	0.00440258	0.0139493	0.00751307	INPP5D/BTK/FCGR2B	3
BP	GO:0032930	positive regulation of superoxide anion generation	3/337	19/18903	0.00440258	0.0139493	0.00751307	SYK/AGT/MAPT	3
BP	GO:0035813	regulation of renal sodium excretion	3/337	19/18903	0.00440258	0.0139493	0.00751307	AGT/TACR1/AGTR1	3
BP	GO:0060039	pericardium development	3/337	19/18903	0.00440258	0.0139493	0.00751307	BMP2/BMP7/WNT5A	3
BP	GO:2000251	positive regulation of actin cytoskeleton reorganization	3/337	19/18903	0.00440258	0.0139493	0.00751307	TEK/NTF3/CSF3	3
BP	GO:2001185	regulation of CD8-positive, alpha-beta T cell activation	3/337	19/18903	0.00440258	0.0139493	0.00751307	HLA-E/HLA-A/XCL1	3
BP	GO:0071383	cellular response to steroid hormone stimulus	10/337	209/18903	0.00441101	0.0139654	0.00752171	PPARD/GPER1/FLT3/SSTR5/BMP7/NR2E1/NR4A3/PGR/NODAL/GHRHR	10
BP	GO:0045861	negative regulation of proteolysis	14/337	352/18903	0.00448397	0.0141856	0.00764031	SLPI/HGF/A2M/AGT/LTF/TNF/C3/WFDC2/SERPIND1/PRKCG/WFIKKN1/BIRC5/IL1R2/LCN1	14
BP	GO:0003203	endocardial cushion morphogenesis	4/337	38/18903	0.00454248	0.0143271	0.00771652	BMP2/BMP7/TGFB2/FGF8	4
BP	GO:0007617	mating behavior	4/337	38/18903	0.00454248	0.0143271	0.00771652	SEMG1/TACR1/THRB/VGF	4
BP	GO:0032094	response to food	4/337	38/18903	0.00454248	0.0143271	0.00771652	NPY/PRKCG/MPO/LEP	4
BP	GO:0140448	signaling receptor ligand precursor processing	4/337	38/18903	0.00454248	0.0143271	0.00771652	PCSK2/CTSG/CMA1/PCSK1	4
BP	GO:0042303	molting cycle	7/337	115/18903	0.00456144	0.0143542	0.00773113	TNF/TGFB2/TNFRSF19/DKK1/WNT5A/GAL/LGR5	7
BP	GO:0042633	hair cycle	7/337	115/18903	0.00456144	0.0143542	0.00773113	TNF/TGFB2/TNFRSF19/DKK1/WNT5A/GAL/LGR5	7
BP	GO:0048640	negative regulation of developmental growth	7/337	115/18903	0.00456144	0.0143542	0.00773113	SEMA6A/SEMA3E/SEMA6B/SLIT1/WNT5A/SEMA6D/SEMA3B	7
BP	GO:0060135	maternal process involved in female pregnancy	5/337	61/18903	0.00459802	0.0144584	0.00778723	PPARD/PTN/AGRP/PGR/NODAL	5
BP	GO:0043506	regulation of JUN kinase activity	5/337	62/18903	0.00492985	0.0154784	0.00833661	SYK/CCL19/TNF/DKK1/WNT5A	5
BP	GO:1903018	regulation of glycoprotein metabolic process	5/337	62/18903	0.00492985	0.0154784	0.00833661	IL33/CCL19/IGF1/CCL21/PTX3	5
BP	GO:0009595	detection of biotic stimulus	4/337	39/18903	0.00499169	0.0156136	0.00840943	HLA-B/HLA-A/TLR4/DMBT1	4
BP	GO:0033028	myeloid cell apoptotic process	4/337	39/18903	0.00499169	0.0156136	0.00840943	KITLG/EPO/IL6/ADIPOQ	4
BP	GO:0045066	regulatory T cell differentiation	4/337	39/18903	0.00499169	0.0156136	0.00840943	HLA-DRA/HLA-G/IL2RG/TNFSF4	4
BP	GO:0071634	regulation of transforming growth factor beta production	4/337	39/18903	0.00499169	0.0156136	0.00840943	XCL1/TGFB2/LTBP1/IL13	4
BP	GO:0097242	amyloid-beta clearance	4/337	39/18903	0.00499169	0.0156136	0.00840943	TNF/C3/IL4/MARCO	4
BP	GO:0021782	glial cell development	7/337	117/18903	0.00501078	0.0156615	0.00843524	NRG1/TLR4/TNF/IL1B/VIM/MAPT/IL6	7
BP	GO:0002064	epithelial cell development	10/337	213/18903	0.00503295	0.015719	0.0084662	RARB/MET/TNF/IL1B/IL1A/BMP6/VIM/WNT5A/PGR/ADIPOQ	10
BP	GO:0001780	neutrophil homeostasis	3/337	20/18903	0.00511182	0.0159056	0.00856669	BTK/CSF1/IL6	3
BP	GO:0008340	determination of adult lifespan	3/337	20/18903	0.00511182	0.0159056	0.00856669	INPP5D/GHRHR/LEP	3
BP	GO:0014856	skeletal muscle cell proliferation	3/337	20/18903	0.00511182	0.0159056	0.00856669	PPARD/HGF/ANGPT1	3
BP	GO:0015732	prostaglandin transport	3/337	20/18903	0.00511182	0.0159056	0.00856669	IL1B/IL1A/LEP	3
BP	GO:1901317	regulation of flagellated sperm motility	3/337	20/18903	0.00511182	0.0159056	0.00856669	SEMG1/TACR1/DEFB1	3
BP	GO:0007589	body fluid secretion	6/337	89/18903	0.00516655	0.0160638	0.00865193	PRLR/TACR1/OPRK1/SCT/PRL/GHRHR	6
BP	GO:0030326	embryonic limb morphogenesis	7/337	118/18903	0.00524755	0.0162913	0.00877444	RARB/BMP7/TGFB2/FGF9/DKK1/FGF8/WNT5A	7
BP	GO:0035113	embryonic appendage morphogenesis	7/337	118/18903	0.00524755	0.0162913	0.00877444	RARB/BMP7/TGFB2/FGF9/DKK1/FGF8/WNT5A	7
BP	GO:0050994	regulation of lipid catabolic process	5/337	63/18903	0.00527831	0.0163746	0.0088193	PIK3CG/TNF/IL1B/SCT/FGF21	5
BP	GO:0110148	biomineralization	9/337	181/18903	0.005288	0.0163924	0.00882889	IGF1/LTF/BMP2/BMPR1B/HTN3/BMP7/BMP6/PTN/LEP	9
BP	GO:0061351	neural precursor cell proliferation	8/337	149/18903	0.0053304	0.0165115	0.00889307	CX3CR1/EGF/RORA/NR2E1/PTN/FGF8/WNT5A/ARTN	8
BP	GO:0010586	miRNA metabolic process	6/337	90/18903	0.00545464	0.0168712	0.0090868	PPARD/TNF/BMP2/TGFB2/NFATC4/PRL	6
BP	GO:0051591	response to cAMP	6/337	90/18903	0.00545464	0.0168712	0.0090868	PIK3CG/DUOX2/PTAFR/VGF/AREG/ADIPOQ	6
BP	GO:0010863	positive regulation of phospholipase C activity	4/337	40/18903	0.00546974	0.0168928	0.00909842	ITK/AGT/PTAFR/ADCYAP1R1	4
BP	GO:1904994	regulation of leukocyte adhesion to vascular endothelial cell	4/337	40/18903	0.00546974	0.0168928	0.00909842	TNF/PTAFR/CCL21/IL6	4
BP	GO:0007613	memory	7/337	120/18903	0.00574617	0.0177333	0.00955112	CX3CR1/TACR1/NTF3/NFATC4/PTN/MAPT/BDNF	7
BP	GO:0034599	cellular response to oxidative stress	12/337	288/18903	0.00575543	0.0177488	0.00955943	HGF/MET/BTK/TLR4/TNF/BMP7/TNFAIP3/MAPT/NR4A2/NR4A3/MPO/IL6	12
BP	GO:0046718	viral entry into host cell	8/337	151/18903	0.00576802	0.0177744	0.00957324	CD74/TRIM22/CIITA/CCR5/CR2/CD4/PTX3/AGTR1	8
BP	GO:0010829	negative regulation of glucose transmembrane transport	3/337	21/18903	0.00588592	0.0180175	0.00970417	TNF/IL1B/LEP	3
BP	GO:0035812	renal sodium excretion	3/337	21/18903	0.00588592	0.0180175	0.00970417	AGT/TACR1/AGTR1	3
BP	GO:0043373	CD4-positive, alpha-beta T cell lineage commitment	3/337	21/18903	0.00588592	0.0180175	0.00970417	TNFSF18/IL12B/IL6	3
BP	GO:0045063	T-helper 1 cell differentiation	3/337	21/18903	0.00588592	0.0180175	0.00970417	CCL19/TNFSF4/IL18R1	3
BP	GO:0060252	positive regulation of glial cell proliferation	3/337	21/18903	0.00588592	0.0180175	0.00970417	TNF/IL1B/IL6	3
BP	GO:0090026	positive regulation of monocyte chemotaxis	3/337	21/18903	0.00588592	0.0180175	0.00970417	CX3CR1/TNFSF18/CCL5	3
BP	GO:1903206	negative regulation of hydrogen peroxide-induced cell death	3/337	21/18903	0.00588592	0.0180175	0.00970417	HGF/MET/NR4A3	3
BP	GO:1904754	positive regulation of vascular associated smooth muscle cell migration	3/337	21/18903	0.00588592	0.0180175	0.00970417	AGT/FGF9/NR4A3	3
BP	GO:2000319	regulation of T-helper 17 cell differentiation	3/337	21/18903	0.00588592	0.0180175	0.00970417	TNFSF18/IL12B/IL4	3
BP	GO:0014912	negative regulation of smooth muscle cell migration	4/337	41/18903	0.00597744	0.0182172	0.0098117	PPARD/SLIT2/SEMA6D/ADIPOQ	4
BP	GO:0070232	regulation of T cell apoptotic process	4/337	41/18903	0.00597744	0.0182172	0.0098117	PDCD1/CCL5/WNT5A/PRKCQ	4
BP	GO:0070884	regulation of calcineurin-NFAT signaling cascade	4/337	41/18903	0.00597744	0.0182172	0.0098117	NRG1/IGF1/TNF/PLCG2	4
BP	GO:1901031	regulation of response to reactive oxygen species	4/337	41/18903	0.00597744	0.0182172	0.0098117	HGF/MET/BMP7/NR4A3	4
BP	GO:1905314	semi-lunar valve development	4/337	41/18903	0.00597744	0.0182172	0.0098117	BMP2/TGFB2/SLIT2/ELN	4
BP	GO:2000008	regulation of protein localization to cell surface	4/337	41/18903	0.00597744	0.0182172	0.0098117	EGF/CD247/TNF/BDNF	4
BP	GO:0072006	nephron development	8/337	152/18903	0.00599684	0.0182629	0.00983634	TEK/ANGPT1/AGT/BMP2/FGF1/BMP7/FGF8/ADIPOQ	8
BP	GO:2000278	regulation of DNA biosynthetic process	7/337	121/18903	0.00600837	0.0182846	0.00984804	HGF/TNF/GDF2/NPPC/NOX4/PRKCQ/ADIPOQ	7
BP	GO:0040014	regulation of multicellular organism growth	5/337	65/18903	0.00602688	0.0183007	0.00985673	IGF1/CSF1/NPPC/PRL/GHRHR	5
BP	GO:1905953	negative regulation of lipid localization	5/337	65/18903	0.00602688	0.0183007	0.00985673	PPARD/EGF/TNF/IL6/LEP	5
BP	GO:2000272	negative regulation of signaling receptor activity	5/337	65/18903	0.00602688	0.0183007	0.00985673	CALCR/TNF/DKK1/WFIKKN1/CBLC	5
BP	GO:0032956	regulation of actin cytoskeleton organization	14/337	365/18903	0.00612656	0.0185899	0.0100124	MET/SDC4/TEK/CSF1R/TACR1/SEMA3E/CCL11/CCL21/NTF3/IL1A/SLIT2/CSF3/RAC3/ELN	14
BP	GO:0071496	cellular response to external stimulus	13/337	328/18903	0.00623603	0.0189082	0.0101839	IL33/PTPRC/AGT/TLR4/TLR7/ALB/IL1B/BMP6/NR4A2/UCN2/IL13/LEP/GCGR	13
BP	GO:0021537	telencephalon development	11/337	255/18903	0.0062557	0.018954	0.0102086	RARB/NRG1/NPY/CSF1R/BMP2/SCT/SEMA6B/SLIT2/NR2E1/FGF8/WNT5A	11
BP	GO:0071901	negative regulation of protein serine/threonine kinase activity	7/337	122/18903	0.00627941	0.019012	0.0102398	AGT/BMP2/IL1B/BMP7/TNFAIP3/ADIPOQ/CBLC	7
BP	GO:0009266	response to temperature stimulus	9/337	186/18903	0.00629406	0.0190425	0.0102562	IGF1/TACR1/MICB/FGF1/CD14/HSPA2/IL1A/VGF/MAPT	9
BP	GO:0015850	organic hydroxy compound transport	12/337	292/18903	0.00640051	0.0193505	0.0104221	CETP/EGF/SYK/AGT/NR0B2/OPRK1/BMP6/GAL/AGTR1/PLTP/LEP/ADIPOQ	12
BP	GO:0006066	alcohol metabolic process	14/337	367/18903	0.00641737	0.0193874	0.010442	PPARD/CETP/IGF1/CD244/PTAFR/BMP2/FGF1/GPER1/NR0B2/BMP6/ADCYAP1R1/PLCG2/IL4/LEP	14
BP	GO:0050854	regulation of antigen receptor-mediated signaling pathway	5/337	66/18903	0.00642783	0.0194049	0.0104514	PTPRC/SH2D1A/LCK/FCGR2B/CMTM3	5
BP	GO:0010453	regulation of cell fate commitment	4/337	42/18903	0.00651554	0.019556	0.0105328	TNFSF18/IL12B/DKK1/WNT5A	4
BP	GO:0010463	mesenchymal cell proliferation	4/337	42/18903	0.00651554	0.019556	0.0105328	BMP2/BMP7/FGF9/WNT5A	4
BP	GO:0034142	toll-like receptor 4 signaling pathway	4/337	42/18903	0.00651554	0.019556	0.0105328	TLR4/LTF/CD14/TNFAIP3	4
BP	GO:0050999	regulation of nitric-oxide synthase activity	4/337	42/18903	0.00651554	0.019556	0.0105328	TNF/IL1B/IL1A/LEP	4
BP	GO:0071542	dopaminergic neuron differentiation	4/337	42/18903	0.00651554	0.019556	0.0105328	NR4A2/DKK1/FGF8/WNT5A	4
BP	GO:0071604	transforming growth factor beta production	4/337	42/18903	0.00651554	0.019556	0.0105328	XCL1/TGFB2/LTBP1/IL13	4
BP	GO:0106056	regulation of calcineurin-mediated signaling	4/337	42/18903	0.00651554	0.019556	0.0105328	NRG1/IGF1/TNF/PLCG2	4
BP	GO:1900274	regulation of phospholipase C activity	4/337	42/18903	0.00651554	0.019556	0.0105328	ITK/AGT/PTAFR/ADCYAP1R1	4
BP	GO:0031589	cell-substrate adhesion	14/337	369/18903	0.00671914	0.0199298	0.0107341	PPARD/ITGAL/SDC4/TEK/ANGPT1/NPY/CSF1/SEMA3E/CD3E/CCL21/FGA/APOD/MMP12/RAC3	14
BP	GO:0002902	regulation of B cell apoptotic process	3/337	22/18903	0.00672637	0.0199298	0.0107341	CD74/BTK/PDCD1	3
BP	GO:0007620	copulation	3/337	22/18903	0.00672637	0.0199298	0.0107341	SEMG1/TACR1/VGF	3
BP	GO:0031290	retinal ganglion cell axon guidance	3/337	22/18903	0.00672637	0.0199298	0.0107341	BMPR1B/SLIT2/SLIT1	3
BP	GO:0032303	regulation of icosanoid secretion	3/337	22/18903	0.00672637	0.0199298	0.0107341	SYK/IL1B/IL1A	3
BP	GO:0032700	negative regulation of interleukin-17 production	3/337	22/18903	0.00672637	0.0199298	0.0107341	TLR4/IL12B/TNFSF4	3
BP	GO:0032891	negative regulation of organic acid transport	3/337	22/18903	0.00672637	0.0199298	0.0107341	TNF/TRH/LEP	3
BP	GO:0032928	regulation of superoxide anion generation	3/337	22/18903	0.00672637	0.0199298	0.0107341	SYK/AGT/MAPT	3
BP	GO:0035584	calcium-mediated signaling using intracellular calcium source	3/337	22/18903	0.00672637	0.0199298	0.0107341	PTPRC/DEFB1/AZU1	3
BP	GO:0043371	negative regulation of CD4-positive, alpha-beta T cell differentiation	3/337	22/18903	0.00672637	0.0199298	0.0107341	TNFSF18/TNFSF4/IL4	3
BP	GO:0044062	regulation of excretion	3/337	22/18903	0.00672637	0.0199298	0.0107341	AGT/TACR1/AGTR1	3
BP	GO:0044321	response to leptin	3/337	22/18903	0.00672637	0.0199298	0.0107341	EBI3/NR4A3/LEP	3
BP	GO:0050765	negative regulation of phagocytosis	3/337	22/18903	0.00672637	0.0199298	0.0107341	FCGR2B/PRTN3/ADIPOQ	3
BP	GO:0051767	nitric-oxide synthase biosynthetic process	3/337	22/18903	0.00672637	0.0199298	0.0107341	IL33/CCL2/TLR4	3
BP	GO:0051769	regulation of nitric-oxide synthase biosynthetic process	3/337	22/18903	0.00672637	0.0199298	0.0107341	IL33/CCL2/TLR4	3
BP	GO:0070886	positive regulation of calcineurin-NFAT signaling cascade	3/337	22/18903	0.00672637	0.0199298	0.0107341	NRG1/IGF1/TNF	3
BP	GO:0098743	cell aggregation	3/337	22/18903	0.00672637	0.0199298	0.0107341	LTF/BMPR1B/BMP1	3
BP	GO:0106058	positive regulation of calcineurin-mediated signaling	3/337	22/18903	0.00672637	0.0199298	0.0107341	NRG1/IGF1/TNF	3
BP	GO:0055007	cardiac muscle cell differentiation	7/337	124/18903	0.00684869	0.0202778	0.0109216	RARB/NRG1/AGT/IGF1/BMP2/DKK1/NOX4	7
BP	GO:0042692	muscle cell differentiation	15/337	409/18903	0.00691875	0.0204706	0.0110254	SORT1/RARB/NRG1/AGT/IGF1/BMP2/GPER1/RORA/NFATC4/FGF9/DKK1/NOX4/WFIKKN1/IL4/BDNF	15
BP	GO:0045638	negative regulation of myeloid cell differentiation	6/337	95/18903	0.0070741	0.0209005	0.0112569	INPP5D/TLR4/LTF/IL4/INHA/ADIPOQ	6
BP	GO:1900407	regulation of cellular response to oxidative stress	6/337	95/18903	0.0070741	0.0209005	0.0112569	HGF/MET/TLR4/TNF/BMP7/NR4A3	6
BP	GO:0021879	forebrain neuron differentiation	4/337	43/18903	0.0070848	0.0209024	0.011258	B2M/NRP2/CSF1R/SEMA3E	4
BP	GO:0045687	positive regulation of glial cell differentiation	4/337	43/18903	0.0070848	0.0209024	0.011258	IL33/BMP2/PTN/IL34	4
BP	GO:0032024	positive regulation of insulin secretion	5/337	68/18903	0.00728519	0.0214784	0.0115682	PPARD/GPER1/NR0B2/GIPR/TRH	5
BP	GO:0045927	positive regulation of growth	11/337	261/18903	0.00739812	0.0217959	0.0117392	PPARD/IGF1/CSF1/IL7/TGFB2/FGF9/MAPT/FGF8/BDNF/GHRHR/LEP	11
BP	GO:0019217	regulation of fatty acid metabolic process	6/337	96/18903	0.00743562	0.0218753	0.011782	FABP3/PPARD/CD74/IL1B/NR4A3/ADIPOQ	6
BP	GO:0032091	negative regulation of protein binding	6/337	96/18903	0.00743562	0.0218753	0.011782	SLPI/B2M/NFATC4/DKK1/WFIKKN1/ADIPOQ	6
BP	GO:0032411	positive regulation of transporter activity	7/337	126/18903	0.00745544	0.0219182	0.011805	CCL2/PTAFR/CTSS/HSPA2/PLCG2/GAL/ADIPOQ	7
BP	GO:0044409	entry into host	8/337	158/18903	0.00751778	0.0220858	0.0118953	CD74/TRIM22/CIITA/CCR5/CR2/CD4/PTX3/AGTR1	8
BP	GO:0046777	protein autophosphorylation	10/337	226/18903	0.00754031	0.0221364	0.0119226	PTPRC/BTK/SYK/PRLR/TEK/CSF1R/LCK/FLT3/PRKCG/ADIPOQ	10
BP	GO:0002363	alpha-beta T cell lineage commitment	3/337	23/18903	0.00763452	0.0222557	0.0119869	TNFSF18/IL12B/IL6	3
BP	GO:0032727	positive regulation of interferon-alpha production	3/337	23/18903	0.00763452	0.0222557	0.0119869	TLR4/TLR7/MMP12	3
BP	GO:0035739	CD4-positive, alpha-beta T cell proliferation	3/337	23/18903	0.00763452	0.0222557	0.0119869	XCL1/CD3E/PRKCQ	3
BP	GO:0045591	positive regulation of regulatory T cell differentiation	3/337	23/18903	0.00763452	0.0222557	0.0119869	HLA-DRA/HLA-G/IL2RG	3
BP	GO:0045624	positive regulation of T-helper cell differentiation	3/337	23/18903	0.00763452	0.0222557	0.0119869	CCL19/IL12B/TNFSF4	3
BP	GO:0061760	antifungal innate immune response	3/337	23/18903	0.00763452	0.0222557	0.0119869	CX3CR1/DEFB119/PLCG2	3
BP	GO:0150146	cell junction disassembly	3/337	23/18903	0.00763452	0.0222557	0.0119869	CX3CR1/C3/DKK1	3
BP	GO:1901032	negative regulation of response to reactive oxygen species	3/337	23/18903	0.00763452	0.0222557	0.0119869	HGF/MET/NR4A3	3
BP	GO:2000178	negative regulation of neural precursor cell proliferation	3/337	23/18903	0.00763452	0.0222557	0.0119869	NR2E1/PTN/WNT5A	3
BP	GO:2000561	regulation of CD4-positive, alpha-beta T cell proliferation	3/337	23/18903	0.00763452	0.0222557	0.0119869	XCL1/CD3E/PRKCQ	3
BP	GO:0006509	membrane protein ectodomain proteolysis	4/337	44/18903	0.00768595	0.02239	0.0120592	TNF/IL1B/PRTN3/PRKCQ	4
BP	GO:0030858	positive regulation of epithelial cell differentiation	5/337	69/18903	0.00774242	0.0225229	0.0121308	BMP2/BMP7/BMP6/GDF2/IL13	5
BP	GO:0034394	protein localization to cell surface	5/337	69/18903	0.00774242	0.0225229	0.0121308	EGF/ANGPT1/CD247/TNF/BDNF	5
BP	GO:0007292	female gamete generation	8/337	159/18903	0.00779714	0.0226662	0.012208	IGF1/BMPR1B/PTN/NPPC/PTX3/PGR/LGR5/LEP	8
BP	GO:0003012	muscle system process	16/337	455/18903	0.00791401	0.0229899	0.0123823	PIK3CG/PRKCA/AGT/IGF1/KCNH2/TNF/PTAFR/TACR1/IL1B/GPER1/LTB4R/FGF12/NR4A3/UTS2/TPM2/LEP	16
BP	GO:0046683	response to organophosphorus	7/337	128/18903	0.00810107	0.0235169	0.0126661	PIK3CG/DUOX2/PTAFR/IL1B/VGF/AREG/ADIPOQ	7
BP	GO:0010952	positive regulation of peptidase activity	9/337	194/18903	0.0082026	0.023795	0.0128159	SEMG1/SYK/TNF/ACVR1C/GPER1/FASLG/LCK/MAPT/NODAL	9
BP	GO:0010799	regulation of peptidyl-threonine phosphorylation	4/337	45/18903	0.0083197	0.024034	0.0129447	EGF/BMP7/WNT5A/AZU1	4
BP	GO:0030574	collagen catabolic process	4/337	45/18903	0.0083197	0.024034	0.0129447	CTSS/PRTN3/MMP12/TMPRSS6	4
BP	GO:0033003	regulation of mast cell activation	4/337	45/18903	0.0083197	0.024034	0.0129447	SYK/NR4A3/IL4/IL13	4
BP	GO:0046636	negative regulation of alpha-beta T cell activation	4/337	45/18903	0.0083197	0.024034	0.0129447	TNFSF18/XCL1/TNFSF4/IL4	4
BP	GO:0051955	regulation of amino acid transport	4/337	45/18903	0.0083197	0.024034	0.0129447	AGT/TNF/TRH/LEP	4
BP	GO:1904646	cellular response to amyloid-beta	4/337	45/18903	0.0083197	0.024034	0.0129447	TLR4/IGF1/TNF/FCGR2B	4
BP	GO:0051495	positive regulation of cytoskeleton organization	9/337	195/18903	0.00846907	0.0244486	0.0131679	MET/SDC4/TEK/TACR1/CCL11/CCL21/NTF3/MAPT/CSF3	9
BP	GO:0008037	cell recognition	10/337	230/18903	0.0084792	0.0244608	0.0131745	NCR3/CCL19/COLEC12/IGHD/COLEC10/CCL21/IGKC/FCN2/PTX3/MBL2	10
BP	GO:0002755	MyD88-dependent toll-like receptor signaling pathway	3/337	24/18903	0.00861156	0.0247567	0.0133339	REG3G/BTK/TLR4	3
BP	GO:0043369	CD4-positive or CD8-positive, alpha-beta T cell lineage commitment	3/337	24/18903	0.00861156	0.0247567	0.0133339	TNFSF18/IL12B/IL6	3
BP	GO:0060571	morphogenesis of an epithelial fold	3/337	24/18903	0.00861156	0.0247567	0.0133339	BMP7/WNT5A/NODAL	3
BP	GO:0071676	negative regulation of mononuclear cell migration	3/337	24/18903	0.00861156	0.0247567	0.0133339	CCL2/APOD/SLIT2	3
BP	GO:1903792	negative regulation of anion transport	3/337	24/18903	0.00861156	0.0247567	0.0133339	TNF/TRH/LEP	3
BP	GO:0051056	regulation of small GTPase mediated signal transduction	12/337	305/18903	0.00889995	0.0255681	0.0137709	PIK3CG/MET/KITLG/VAV3/NRG1/IGF1/CSF1/VAV2/TGFB2/ADCYAP1R1/SLIT2/EPO	12
BP	GO:1904752	regulation of vascular associated smooth muscle cell migration	4/337	46/18903	0.00898673	0.0257463	0.0138669	AGT/FGF9/NR4A3/ADIPOQ	4
BP	GO:1990090	cellular response to nerve growth factor stimulus	4/337	46/18903	0.00898673	0.0257463	0.0138669	SORT1/NTF3/MAPT/BDNF	4
BP	GO:2000273	positive regulation of signaling receptor activity	4/337	46/18903	0.00898673	0.0257463	0.0138669	TGFA/EGF/CCL2/AREG	4
BP	GO:2001239	regulation of extrinsic apoptotic signaling pathway in absence of ligand	4/337	46/18903	0.00898673	0.0257463	0.0138669	TNF/IL1B/IL7/IL1A	4
BP	GO:0071248	cellular response to metal ion	9/337	198/18903	0.00930805	0.0266485	0.0143528	B2M/SLC40A1/CYBB/BMP6/TFR2/NFATC4/PLCG2/WNT5A/FABP4	9
BP	GO:0062197	cellular response to chemical stress	13/337	345/18903	0.00932473	0.0266778	0.0143686	HGF/MET/BTK/TLR4/TNF/BMP7/TNFAIP3/MAPT/NR4A2/NR4A3/EPO/MPO/IL6	13
BP	GO:0003148	outflow tract septum morphogenesis	3/337	25/18903	0.00965856	0.0274816	0.0148015	NRP2/TGFB2/FGF8	3
BP	GO:0032693	negative regulation of interleukin-10 production	3/337	25/18903	0.00965856	0.0274816	0.0148015	BTK/IL12B/FCGR2B	3
BP	GO:0032816	positive regulation of natural killer cell activation	3/337	25/18903	0.00965856	0.0274816	0.0148015	HLA-E/HLA-F/IL12B	3
BP	GO:0043567	regulation of insulin-like growth factor receptor signaling pathway	3/337	25/18903	0.00965856	0.0274816	0.0148015	IGF1/BMP2/GHRHR	3
BP	GO:0045662	negative regulation of myoblast differentiation	3/337	25/18903	0.00965856	0.0274816	0.0148015	PPARD/CCL17/TNF	3
BP	GO:0048714	positive regulation of oligodendrocyte differentiation	3/337	25/18903	0.00965856	0.0274816	0.0148015	IL33/PTN/IL34	3
BP	GO:1904996	positive regulation of leukocyte adhesion to vascular endothelial cell	3/337	25/18903	0.00965856	0.0274816	0.0148015	TNF/PTAFR/IL6	3
BP	GO:2000193	positive regulation of fatty acid transport	3/337	25/18903	0.00965856	0.0274816	0.0148015	FABP3/IL1B/IL1A	3
BP	GO:0031018	endocrine pancreas development	4/337	47/18903	0.00968769	0.027508	0.0148157	BMP6/WNT5A/GIPR/IL6	4
BP	GO:0045601	regulation of endothelial cell differentiation	4/337	47/18903	0.00968769	0.027508	0.0148157	TNF/IL1B/BMP6/GDF2	4
BP	GO:1902895	positive regulation of miRNA transcription	4/337	47/18903	0.00968769	0.027508	0.0148157	TNF/BMP2/TGFB2/PRL	4
BP	GO:0042246	tissue regeneration	5/337	73/18903	0.00977117	0.0277261	0.0149332	PPARD/IGF1/LGR6/APOD/PTN	5
BP	GO:1904950	negative regulation of establishment of protein localization	7/337	133/18903	0.00989455	0.0280571	0.0151114	ANGPT1/ACVR1C/IL1B/IL12B/APOD/MAPT/ADIPOQ	7
BP	GO:0007585	respiratory gaseous exchange by respiratory system	5/337	74/18903	0.0103303	0.0292527	0.0157554	CYSLTR1/CSF2RB/NR4A2/SFTPD/ELN	5
BP	GO:0035924	cellular response to vascular endothelial growth factor stimulus	5/337	74/18903	0.0103303	0.0292527	0.0157554	NRP2/SEMA6A/IL12B/FLT3/PGF	5
BP	GO:0048477	oogenesis	6/337	103/18903	0.0103488	0.0292654	0.0157623	IGF1/BMPR1B/PTN/NPPC/PTX3/LGR5	6
BP	GO:0070167	regulation of biomineral tissue development	6/337	103/18903	0.0103488	0.0292654	0.0157623	LTF/BMP2/BMPR1B/BMP7/BMP6/PTN	6
BP	GO:0003197	endocardial cushion development	4/337	48/18903	0.0104232	0.0293559	0.015811	BMP2/BMP7/TGFB2/FGF8	4
BP	GO:0032309	icosanoid secretion	4/337	48/18903	0.0104232	0.0293559	0.015811	SYK/IL1B/IL1A/LEP	4
BP	GO:0045581	negative regulation of T cell differentiation	4/337	48/18903	0.0104232	0.0293559	0.015811	CD74/TNFSF18/TNFSF4/IL4	4
BP	GO:0046717	acid secretion	4/337	48/18903	0.0104232	0.0293559	0.015811	TNF/SCT/OPRL1/TRH	4
BP	GO:1904738	vascular associated smooth muscle cell migration	4/337	48/18903	0.0104232	0.0293559	0.015811	AGT/FGF9/NR4A3/ADIPOQ	4
BP	GO:1990089	response to nerve growth factor	4/337	48/18903	0.0104232	0.0293559	0.015811	SORT1/NTF3/MAPT/BDNF	4
BP	GO:0007160	cell-matrix adhesion	10/337	238/18903	0.0106241	0.0299015	0.0161048	ITGAL/SDC4/TEK/CSF1/SEMA3E/CD3E/CCL21/FGA/APOD/MMP12	10
BP	GO:2001235	positive regulation of apoptotic signaling pathway	7/337	135/18903	0.0106874	0.0300592	0.0161898	PTPRC/AGT/TNF/BMPR1B/GPER1/LCK/NFATC4	7
BP	GO:0045672	positive regulation of osteoclast differentiation	3/337	26/18903	0.0107765	0.0302076	0.0162697	CSF1/TNF/IL12B	3
BP	GO:0046639	negative regulation of alpha-beta T cell differentiation	3/337	26/18903	0.0107765	0.0302076	0.0162697	TNFSF18/TNFSF4/IL4	3
BP	GO:0050857	positive regulation of antigen receptor-mediated signaling pathway	3/337	26/18903	0.0107765	0.0302076	0.0162697	PTPRC/LCK/CMTM3	3
BP	GO:0050995	negative regulation of lipid catabolic process	3/337	26/18903	0.0107765	0.0302076	0.0162697	PIK3CG/TNF/IL1B	3
BP	GO:0060740	prostate gland epithelium morphogenesis	3/337	26/18903	0.0107765	0.0302076	0.0162697	BMP7/WNT5A/TNC	3
BP	GO:1902882	regulation of response to oxidative stress	6/337	104/18903	0.0108227	0.0303167	0.0163285	HGF/MET/TLR4/TNF/BMP7/NR4A3	6
BP	GO:0002262	myeloid cell homeostasis	8/337	169/18903	0.0110376	0.0308978	0.0166414	B2M/INPP5D/BTK/KITLG/CSF1/EPO/INHA/IL6	8
BP	GO:0150063	visual system development	14/337	392/18903	0.0110717	0.0309723	0.0166816	RARB/THRB/BMPR1B/FASLG/C3/BMP7/BMP6/TGFB2/NR2E1/FGF9/RORB/VIM/WNT5A/ANGPTL7	14
BP	GO:0050808	synapse organization	15/337	432/18903	0.0110865	0.0309931	0.0166928	CX3CR1/NRG1/IL10RA/NRP2/TNF/SEMA3E/FCGR2B/C3/SLIT1/NFATC4/MAPT/DKK1/WNT5A/BDNF/TNC	15
BP	GO:0071333	cellular response to glucose stimulus	7/337	136/18903	0.0111007	0.0310118	0.0167028	PPARD/CMA1/GPER1/OPRK1/NOX4/FGF21/GHRHR	7
BP	GO:0035094	response to nicotine	4/337	49/18903	0.0111939	0.0312303	0.0168205	B2M/TNF/TACR1/IL13	4
BP	GO:0042311	vasodilation	4/337	49/18903	0.0111939	0.0312303	0.0168205	PPARD/AGT/TNF/GPER1	4
BP	GO:0033673	negative regulation of kinase activity	10/337	240/18903	0.0112197	0.0312811	0.0168479	PTPRC/AGT/BMP2/IL1B/BMP7/TNFAIP3/MAPT/FABP4/ADIPOQ/CBLC	10
BP	GO:0032479	regulation of type I interferon production	6/337	105/18903	0.0113118	0.0314745	0.0169521	SYK/TLR4/TLR7/CD14/PLCG2/MMP12	6
BP	GO:0032606	type I interferon production	6/337	105/18903	0.0113118	0.0314745	0.0169521	SYK/TLR4/TLR7/CD14/PLCG2/MMP12	6
BP	GO:0110149	regulation of biomineralization	6/337	105/18903	0.0113118	0.0314745	0.0169521	LTF/BMP2/BMPR1B/BMP7/BMP6/PTN	6
BP	GO:0001937	negative regulation of endothelial cell proliferation	5/337	76/18903	0.0115134	0.0320142	0.0172428	CCL2/TNF/IL12B/GDF2/PRL	5
BP	GO:0042445	hormone metabolic process	10/337	241/18903	0.0115267	0.0320299	0.0172512	PCSK2/DUOX2/CTSG/BMP2/CMA1/PCSK1/BMP6/GAL/GHRHR/LEP	10
BP	GO:0071331	cellular response to hexose stimulus	7/337	138/18903	0.0119618	0.0330739	0.0178135	PPARD/CMA1/GPER1/OPRK1/NOX4/FGF21/GHRHR	7
BP	GO:0001783	B cell apoptotic process	3/337	27/18903	0.0119661	0.0330739	0.0178135	CD74/BTK/PDCD1	3
BP	GO:0003401	axis elongation	3/337	27/18903	0.0119661	0.0330739	0.0178135	FGF1/WNT5A/AREG	3
BP	GO:0030262	apoptotic nuclear changes	3/337	27/18903	0.0119661	0.0330739	0.0178135	ACVR1C/GPER1/IL6	3
BP	GO:0034143	regulation of toll-like receptor 4 signaling pathway	3/337	27/18903	0.0119661	0.0330739	0.0178135	LTF/CD14/TNFAIP3	3
BP	GO:0042832	defense response to protozoan	3/337	27/18903	0.0119661	0.0330739	0.0178135	GBP2/IL12B/SLC11A1	3
BP	GO:0051953	negative regulation of amine transport	3/337	27/18903	0.0119661	0.0330739	0.0178135	TNF/TRH/LEP	3
BP	GO:1903055	positive regulation of extracellular matrix organization	3/337	27/18903	0.0119661	0.0330739	0.0178135	AGT/BMP2/IL6	3
BP	GO:0002066	columnar/cuboidal epithelial cell development	4/337	50/18903	0.0120004	0.0331246	0.0178408	RARB/BMP6/WNT5A/PGR	4
BP	GO:1902041	regulation of extrinsic apoptotic signaling pathway via death domain receptors	4/337	50/18903	0.0120004	0.0331246	0.0178408	HGF/BMPR1B/FGA/TNFAIP3	4
BP	GO:0003279	cardiac septum development	6/337	107/18903	0.0123363	0.0340292	0.018328	NRP2/BMP7/TGFB2/SLIT2/FGF8/WNT5A	6
BP	GO:0072175	epithelial tube formation	7/337	139/18903	0.01241	0.0342099	0.0184254	EGF/SDC4/BMP7/TGFB2/FGF8/WNT5A/NODAL	7
BP	GO:0048880	sensory system development	14/337	398/18903	0.0125081	0.0344575	0.0185587	RARB/THRB/BMPR1B/FASLG/C3/BMP7/BMP6/TGFB2/NR2E1/FGF9/RORB/VIM/WNT5A/ANGPTL7	14
BP	GO:0045165	cell fate commitment	11/337	282/18903	0.0127196	0.0350169	0.01886	NRG1/TNFSF18/BMP2/IL7/IL12B/NR2E1/DKK1/FGF8/WNT5A/NODAL/IL6	11
BP	GO:0070373	negative regulation of ERK1 and ERK2 cascade	5/337	78/18903	0.0127856	0.0350429	0.018874	PTPRC/TLR4/SEMA6A/GPER1/ADIPOQ	5
BP	GO:0030850	prostate gland development	4/337	51/18903	0.0128432	0.0350429	0.018874	PRLR/BMP7/WNT5A/TNC	4
BP	GO:0032692	negative regulation of interleukin-1 production	4/337	51/18903	0.0128432	0.0350429	0.018874	CX3CR1/IGF1/TNFAIP3/IL1R2	4
BP	GO:0043277	apoptotic cell clearance	4/337	51/18903	0.0128432	0.0350429	0.018874	CCL2/C3/FCN2/MARCO	4
BP	GO:0050807	regulation of synapse organization	9/337	209/18903	0.0129301	0.0350429	0.018874	IL10RA/NRP2/TNF/FCGR2B/SLIT1/NFATC4/DKK1/WNT5A/BDNF	9
BP	GO:0001542	ovulation from ovarian follicle	2/337	10/18903	0.0129735	0.0350429	0.018874	PGR/LEP	2
BP	GO:0001547	antral ovarian follicle growth	2/337	10/18903	0.0129735	0.0350429	0.018874	BMPR1B/PTX3	2
BP	GO:0002002	regulation of angiotensin levels in blood	2/337	10/18903	0.0129735	0.0350429	0.018874	CTSG/CMA1	2
BP	GO:0002361	CD4-positive, CD25-positive, alpha-beta regulatory T cell differentiation	2/337	10/18903	0.0129735	0.0350429	0.018874	HLA-DRA/IL2RG	2
BP	GO:0003330	regulation of extracellular matrix constituent secretion	2/337	10/18903	0.0129735	0.0350429	0.018874	AGT/BMP2	2
BP	GO:0009629	response to gravity	2/337	10/18903	0.0129735	0.0350429	0.018874	PTAFR/NOX3	2
BP	GO:0014012	peripheral nervous system axon regeneration	2/337	10/18903	0.0129735	0.0350429	0.018874	APOD/TNC	2
BP	GO:0032275	luteinizing hormone secretion	2/337	10/18903	0.0129735	0.0350429	0.018874	OPRK1/LEP	2
BP	GO:0032819	positive regulation of natural killer cell proliferation	2/337	10/18903	0.0129735	0.0350429	0.018874	HLA-E/IL12B	2
BP	GO:0045625	regulation of T-helper 1 cell differentiation	2/337	10/18903	0.0129735	0.0350429	0.018874	CCL19/TNFSF4	2
BP	GO:0048304	positive regulation of isotype switching to IgG isotypes	2/337	10/18903	0.0129735	0.0350429	0.018874	PTPRC/IL4	2
BP	GO:0048382	mesendoderm development	2/337	10/18903	0.0129735	0.0350429	0.018874	FGF8/NODAL	2
BP	GO:0070091	glucagon secretion	2/337	10/18903	0.0129735	0.0350429	0.018874	IL6/LEP	2
BP	GO:0070092	regulation of glucagon secretion	2/337	10/18903	0.0129735	0.0350429	0.018874	IL6/LEP	2
BP	GO:0070099	regulation of chemokine-mediated signaling pathway	2/337	10/18903	0.0129735	0.0350429	0.018874	CCL5/SLIT2	2
BP	GO:0070391	response to lipoteichoic acid	2/337	10/18903	0.0129735	0.0350429	0.018874	TLR4/CD14	2
BP	GO:0070472	regulation of uterine smooth muscle contraction	2/337	10/18903	0.0129735	0.0350429	0.018874	TACR1/GPER1	2
BP	GO:0071223	cellular response to lipoteichoic acid	2/337	10/18903	0.0129735	0.0350429	0.018874	TLR4/CD14	2
BP	GO:0090009	primitive streak formation	2/337	10/18903	0.0129735	0.0350429	0.018874	WNT5A/NODAL	2
BP	GO:1903596	regulation of gap junction assembly	2/337	10/18903	0.0129735	0.0350429	0.018874	AGT/IL1B	2
BP	GO:1905918	regulation of CoA-transferase activity	2/337	10/18903	0.0129735	0.0350429	0.018874	AGT/AGTR1	2
BP	GO:2000425	regulation of apoptotic cell clearance	2/337	10/18903	0.0129735	0.0350429	0.018874	CCL2/C3	2
BP	GO:2000659	regulation of interleukin-1-mediated signaling pathway	2/337	10/18903	0.0129735	0.0350429	0.018874	IL1R2/IL6	2
BP	GO:2000726	negative regulation of cardiac muscle cell differentiation	2/337	10/18903	0.0129735	0.0350429	0.018874	BMP2/DKK1	2
BP	GO:0001562	response to protozoan	3/337	28/18903	0.0132282	0.035523	0.0191326	GBP2/IL12B/SLC11A1	3
BP	GO:0021952	central nervous system projection neuron axonogenesis	3/337	28/18903	0.0132282	0.035523	0.0191326	SLIT2/NR2E1/NR4A2	3
BP	GO:0032104	regulation of response to extracellular stimulus	3/337	28/18903	0.0132282	0.035523	0.0191326	NPY/PRKCG/LEP	3
BP	GO:0032107	regulation of response to nutrient levels	3/337	28/18903	0.0132282	0.035523	0.0191326	NPY/PRKCG/LEP	3
BP	GO:0045830	positive regulation of isotype switching	3/337	28/18903	0.0132282	0.035523	0.0191326	PTPRC/TNFSF4/IL4	3
BP	GO:0050996	positive regulation of lipid catabolic process	3/337	28/18903	0.0132282	0.035523	0.0191326	IL1B/SCT/FGF21	3
BP	GO:0060512	prostate gland morphogenesis	3/337	28/18903	0.0132282	0.035523	0.0191326	BMP7/WNT5A/TNC	3
BP	GO:1902883	negative regulation of response to oxidative stress	3/337	28/18903	0.0132282	0.035523	0.0191326	HGF/MET/NR4A3	3
BP	GO:1903959	regulation of anion transmembrane transport	3/337	28/18903	0.0132282	0.035523	0.0191326	AGT/TNF/PTAFR	3
BP	GO:0061333	renal tubule morphogenesis	5/337	79/18903	0.0134559	0.0361112	0.0194494	AGT/BMP2/FGF1/FGF8/LGR5	5
BP	GO:0046622	positive regulation of organ growth	4/337	52/18903	0.0137228	0.0368038	0.0198224	IGF1/IL7/FGF9/FGF8	4
BP	GO:0014074	response to purine-containing compound	7/337	142/18903	0.0138272	0.0370121	0.0199346	PIK3CG/DUOX2/PTAFR/IL1B/VGF/AREG/ADIPOQ	7
BP	GO:0035107	appendage morphogenesis	7/337	142/18903	0.0138272	0.0370121	0.0199346	RARB/BMP7/TGFB2/FGF9/DKK1/FGF8/WNT5A	7
BP	GO:0035108	limb morphogenesis	7/337	142/18903	0.0138272	0.0370121	0.0199346	RARB/BMP7/TGFB2/FGF9/DKK1/FGF8/WNT5A	7
BP	GO:0045833	negative regulation of lipid metabolic process	6/337	110/18903	0.0139928	0.0374313	0.0201604	PIK3CG/TNF/BMP2/IL1B/GPER1/APOD	6
BP	GO:0072028	nephron morphogenesis	5/337	80/18903	0.0141496	0.0378019	0.02036	AGT/BMP2/FGF1/BMP7/FGF8	5
BP	GO:1903201	regulation of oxidative stress-induced cell death	5/337	80/18903	0.0141496	0.0378019	0.02036	HGF/MET/TLR4/TNF/NR4A3	5
BP	GO:0051099	positive regulation of binding	8/337	177/18903	0.0142733	0.0381079	0.0205248	B2M/MET/EGF/IGF1/BMP2/CSF3/WNT5A/BDNF	8
BP	GO:0030534	adult behavior	7/337	143/18903	0.0143244	0.0382198	0.0205851	NPY/OPRK1/FGF12/NR4A2/AGRP/TRH/LEP	7
BP	GO:0017157	regulation of exocytosis	9/337	213/18903	0.0144775	0.0385849	0.0207817	HLA-F/SYK/SDC4/PTAFR/FCGR2B/FGA/PRKCG/IL4/IL13	9
BP	GO:0003209	cardiac atrium morphogenesis	3/337	29/18903	0.0145633	0.0385849	0.0207817	BMP2/TGFB2/WNT5A	3
BP	GO:0006921	cellular component disassembly involved in execution phase of apoptosis	3/337	29/18903	0.0145633	0.0385849	0.0207817	ACVR1C/GPER1/IL6	3
BP	GO:0032607	interferon-alpha production	3/337	29/18903	0.0145633	0.0385849	0.0207817	TLR4/TLR7/MMP12	3
BP	GO:0032647	regulation of interferon-alpha production	3/337	29/18903	0.0145633	0.0385849	0.0207817	TLR4/TLR7/MMP12	3
BP	GO:0042104	positive regulation of activated T cell proliferation	3/337	29/18903	0.0145633	0.0385849	0.0207817	IGF1/IL12B/EPO	3
BP	GO:0048873	homeostasis of number of cells within a tissue	3/337	29/18903	0.0145633	0.0385849	0.0207817	CSF1/IL7/RAC3	3
BP	GO:0051873	killing by host of symbiont cells	3/337	29/18903	0.0145633	0.0385849	0.0207817	CTSG/AZU1/MBL2	3
BP	GO:0060037	pharyngeal system development	3/337	29/18903	0.0145633	0.0385849	0.0207817	BMP7/TGFB2/FGF8	3
BP	GO:0072012	glomerulus vasculature development	3/337	29/18903	0.0145633	0.0385849	0.0207817	TEK/ANGPT1/BMP7	3
BP	GO:0097254	renal tubular secretion	3/337	29/18903	0.0145633	0.0385849	0.0207817	AGT/TACR1/AGTR1	3
BP	GO:0002204	somatic recombination of immunoglobulin genes involved in immune response	4/337	53/18903	0.0146399	0.0386758	0.0208307	PTPRC/CD40LG/TNFSF4/IL4	4
BP	GO:0002208	somatic diversification of immunoglobulins involved in immune response	4/337	53/18903	0.0146399	0.0386758	0.0208307	PTPRC/CD40LG/TNFSF4/IL4	4
BP	GO:0010874	regulation of cholesterol efflux	4/337	53/18903	0.0146399	0.0386758	0.0208307	CETP/EGF/PLTP/ADIPOQ	4
BP	GO:0045190	isotype switching	4/337	53/18903	0.0146399	0.0386758	0.0208307	PTPRC/CD40LG/TNFSF4/IL4	4
BP	GO:0032970	regulation of actin filament-based process	14/337	406/18903	0.0146442	0.0386758	0.0208307	MET/SDC4/TEK/CSF1R/TACR1/SEMA3E/CCL11/CCL21/NTF3/IL1A/SLIT2/CSF3/RAC3/ELN	14
BP	GO:0014855	striated muscle cell proliferation	5/337	81/18903	0.0148669	0.0391645	0.0210939	PPARD/HGF/ANGPT1/TGFB2/FGF9	5
BP	GO:0032371	regulation of sterol transport	5/337	81/18903	0.0148669	0.0391645	0.0210939	CETP/EGF/PLTP/LEP/ADIPOQ	5
BP	GO:0032374	regulation of cholesterol transport	5/337	81/18903	0.0148669	0.0391645	0.0210939	CETP/EGF/PLTP/LEP/ADIPOQ	5
BP	GO:0033555	multicellular organismal response to stress	5/337	81/18903	0.0148669	0.0391645	0.0210939	TACR1/ADCYAP1R1/NR2E1/NR4A2/PRKCG	5
BP	GO:0050803	regulation of synapse structure or activity	9/337	215/18903	0.0153006	0.0402816	0.0216956	IL10RA/NRP2/TNF/FCGR2B/SLIT1/NFATC4/DKK1/WNT5A/BDNF	9
BP	GO:1903305	regulation of regulated secretory pathway	7/337	145/18903	0.0153568	0.0404038	0.0217614	HLA-F/SYK/PTAFR/FCGR2B/PRKCG/IL4/IL13	7
BP	GO:0030857	negative regulation of epithelial cell differentiation	4/337	54/18903	0.0155947	0.0405389	0.0218341	REG3G/IL1A/NODAL/IL13	4
BP	GO:0045744	negative regulation of G protein-coupled receptor signaling pathway	4/337	54/18903	0.0155947	0.0405389	0.0218341	MET/CCL5/OPRL1/GIPR	4
BP	GO:0002158	osteoclast proliferation	2/337	11/18903	0.0156714	0.0405389	0.0218341	CSF1/TNFAIP3	2
BP	GO:0002725	negative regulation of T cell cytokine production	2/337	11/18903	0.0156714	0.0405389	0.0218341	HLA-F/XCL1	2
BP	GO:0002765	immune response-inhibiting signal transduction	2/337	11/18903	0.0156714	0.0405389	0.0218341	HLA-G/KIR2DL1	2
BP	GO:0010739	positive regulation of protein kinase A signaling	2/337	11/18903	0.0156714	0.0405389	0.0218341	CALCR/ADIPOQ	2
BP	GO:0021889	olfactory bulb interneuron differentiation	2/337	11/18903	0.0156714	0.0405389	0.0218341	SLIT2/WNT5A	2
BP	GO:0031943	regulation of glucocorticoid metabolic process	2/337	11/18903	0.0156714	0.0405389	0.0218341	BMP2/GAL	2
BP	GO:0032342	aldosterone biosynthetic process	2/337	11/18903	0.0156714	0.0405389	0.0218341	BMP2/BMP6	2
BP	GO:0032493	response to bacterial lipoprotein	2/337	11/18903	0.0156714	0.0405389	0.0218341	DMBT1/CD14	2
BP	GO:0032610	interleukin-1 alpha production	2/337	11/18903	0.0156714	0.0405389	0.0218341	IL16/IL1R2	2
BP	GO:0032650	regulation of interleukin-1 alpha production	2/337	11/18903	0.0156714	0.0405389	0.0218341	IL16/IL1R2	2
BP	GO:0033210	leptin-mediated signaling pathway	2/337	11/18903	0.0156714	0.0405389	0.0218341	EBI3/LEP	2
BP	GO:0033632	regulation of cell-cell adhesion mediated by integrin	2/337	11/18903	0.0156714	0.0405389	0.0218341	CD3E/CCL5	2
BP	GO:0034350	regulation of glial cell apoptotic process	2/337	11/18903	0.0156714	0.0405389	0.0218341	CCL2/PRKCA	2
BP	GO:0035581	sequestering of extracellular ligand from receptor	2/337	11/18903	0.0156714	0.0405389	0.0218341	GREM2/LTBP1	2
BP	GO:0038003	G protein-coupled opioid receptor signaling pathway	2/337	11/18903	0.0156714	0.0405389	0.0218341	OPRK1/OPRL1	2
BP	GO:0046643	regulation of gamma-delta T cell activation	2/337	11/18903	0.0156714	0.0405389	0.0218341	PTPRC/SYK	2
BP	GO:0060453	regulation of gastric acid secretion	2/337	11/18903	0.0156714	0.0405389	0.0218341	SCT/OPRL1	2
BP	GO:0060601	lateral sprouting from an epithelium	2/337	11/18903	0.0156714	0.0405389	0.0218341	BMP7/WNT5A	2
BP	GO:0070944	neutrophil-mediated killing of bacterium	2/337	11/18903	0.0156714	0.0405389	0.0218341	CTSG/AZU1	2
BP	GO:1901731	positive regulation of platelet aggregation	2/337	11/18903	0.0156714	0.0405389	0.0218341	CTSG/IL6	2
BP	GO:1902093	positive regulation of flagellated sperm motility	2/337	11/18903	0.0156714	0.0405389	0.0218341	TACR1/DEFB1	2
BP	GO:2000155	positive regulation of cilium-dependent cell motility	2/337	11/18903	0.0156714	0.0405389	0.0218341	TACR1/DEFB1	2
BP	GO:2000320	negative regulation of T-helper 17 cell differentiation	2/337	11/18903	0.0156714	0.0405389	0.0218341	TNFSF18/IL4	2
BP	GO:2000672	negative regulation of motor neuron apoptotic process	2/337	11/18903	0.0156714	0.0405389	0.0218341	CRLF1/CNTFR	2
BP	GO:2000833	positive regulation of steroid hormone secretion	2/337	11/18903	0.0156714	0.0405389	0.0218341	BMP6/GAL	2
BP	GO:0006469	negative regulation of protein kinase activity	9/337	216/18903	0.0157249	0.0406519	0.021895	PTPRC/AGT/BMP2/IL1B/BMP7/TNFAIP3/FABP4/ADIPOQ/CBLC	9
BP	GO:0043254	regulation of protein-containing complex assembly	14/337	410/18903	0.0158125	0.0408529	0.0220033	MET/SYK/NRG1/TNFSF18/TLR4/TNF/CCL11/CCL21/SLIT2/PLCG2/MAPT/DKK1/CSF3/ELN	14
BP	GO:0007202	activation of phospholipase C activity	3/337	30/18903	0.0159719	0.0411117	0.0221426	ITK/AGT/ADCYAP1R1	3
BP	GO:0060295	regulation of cilium movement involved in cell motility	3/337	30/18903	0.0159719	0.0411117	0.0221426	SEMG1/TACR1/DEFB1	3
BP	GO:1902019	regulation of cilium-dependent cell motility	3/337	30/18903	0.0159719	0.0411117	0.0221426	SEMG1/TACR1/DEFB1	3
BP	GO:1903203	regulation of oxidative stress-induced neuron death	3/337	30/18903	0.0159719	0.0411117	0.0221426	TLR4/TNF/NR4A3	3
BP	GO:1903205	regulation of hydrogen peroxide-induced cell death	3/337	30/18903	0.0159719	0.0411117	0.0221426	HGF/MET/NR4A3	3
BP	GO:2000108	positive regulation of leukocyte apoptotic process	3/337	30/18903	0.0159719	0.0411117	0.0221426	PDCD1/CCL5/WNT5A	3
BP	GO:0002062	chondrocyte differentiation	6/337	114/18903	0.0164347	0.0422667	0.0227647	RARB/BMP2/BMPR1B/BMP6/FGF9/NPPC	6
BP	GO:0008584	male gonad development	7/337	147/18903	0.016441	0.0422667	0.0227647	KITLG/AMHR2/IL1A/TGFB2/FGF9/WNT5A/INHA	7
BP	GO:0003179	heart valve morphogenesis	4/337	55/18903	0.0165879	0.0425129	0.0228973	BMP2/TGFB2/SLIT2/ELN	4
BP	GO:0043525	positive regulation of neuron apoptotic process	4/337	55/18903	0.0165879	0.0425129	0.0228973	TNF/FASLG/TGFB2/NFATC4	4
BP	GO:0043616	keratinocyte proliferation	4/337	55/18903	0.0165879	0.0425129	0.0228973	PPARD/REG3G/SLURP1/AREG	4
BP	GO:0045668	negative regulation of osteoblast differentiation	4/337	55/18903	0.0165879	0.0425129	0.0228973	TNF/GDF10/RORB/AREG	4
BP	GO:0055078	sodium ion homeostasis	4/337	55/18903	0.0165879	0.0425129	0.0228973	AGT/TACR1/IL1A/AGTR1	4
BP	GO:0046546	development of primary male sexual characteristics	7/337	148/18903	0.017003	0.0435498	0.0234558	KITLG/AMHR2/IL1A/TGFB2/FGF9/WNT5A/INHA	7
BP	GO:0032414	positive regulation of ion transmembrane transporter activity	6/337	115/18903	0.0170883	0.0437414	0.023559	CCL2/PTAFR/CTSS/HSPA2/PLCG2/GAL	6
BP	GO:0044000	movement in host	8/337	183/18903	0.0171177	0.0437898	0.023585	CD74/TRIM22/CIITA/CCR5/CR2/CD4/PTX3/AGTR1	8
BP	GO:0002313	mature B cell differentiation involved in immune response	3/337	31/18903	0.0174545	0.0444325	0.0239312	FCGR2B/PLCG2/IL6	3
BP	GO:0045987	positive regulation of smooth muscle contraction	3/337	31/18903	0.0174545	0.0444325	0.0239312	PTAFR/TACR1/GPER1	3
BP	GO:0060390	regulation of SMAD protein signal transduction	3/337	31/18903	0.0174545	0.0444325	0.0239312	BMP2/BMP6/NODAL	3
BP	GO:0061311	cell surface receptor signaling pathway involved in heart development	3/337	31/18903	0.0174545	0.0444325	0.0239312	BMP2/DKK1/WNT5A	3
BP	GO:0061437	renal system vasculature development	3/337	31/18903	0.0174545	0.0444325	0.0239312	TEK/ANGPT1/BMP7	3
BP	GO:0061440	kidney vasculature development	3/337	31/18903	0.0174545	0.0444325	0.0239312	TEK/ANGPT1/BMP7	3
BP	GO:0098868	bone growth	3/337	31/18903	0.0174545	0.0444325	0.0239312	RARB/NPPC/LEP	3
BP	GO:1902042	negative regulation of extrinsic apoptotic signaling pathway via death domain receptors	3/337	31/18903	0.0174545	0.0444325	0.0239312	HGF/FGA/TNFAIP3	3
BP	GO:0010559	regulation of glycoprotein biosynthetic process	4/337	56/18903	0.0176198	0.0447712	0.0241136	IL33/CCL19/IGF1/CCL21	4
BP	GO:0071715	icosanoid transport	4/337	56/18903	0.0176198	0.0447712	0.0241136	SYK/IL1B/IL1A/LEP	4
BP	GO:2000630	positive regulation of miRNA metabolic process	4/337	56/18903	0.0176198	0.0447712	0.0241136	TNF/BMP2/TGFB2/PRL	4
BP	GO:0034440	lipid oxidation	6/337	116/18903	0.0177595	0.0450986	0.02429	FABP3/PPARD/APOD/NR4A3/LEP/ADIPOQ	6
BP	GO:0002551	mast cell chemotaxis	2/337	12/18903	0.0185864	0.0464325	0.0250084	CCL11/PGF	2
BP	GO:0002645	positive regulation of tolerance induction	2/337	12/18903	0.0185864	0.0464325	0.0250084	HLA-G/CD3E	2
BP	GO:0002887	negative regulation of myeloid leukocyte mediated immunity	2/337	12/18903	0.0185864	0.0464325	0.0250084	CX3CR1/FCGR2B	2
BP	GO:0002924	negative regulation of humoral immune response mediated by circulating immunoglobulin	2/337	12/18903	0.0185864	0.0464325	0.0250084	CR2/FCGR2B	2
BP	GO:0003353	positive regulation of cilium movement	2/337	12/18903	0.0185864	0.0464325	0.0250084	TACR1/DEFB1	2
BP	GO:0006705	mineralocorticoid biosynthetic process	2/337	12/18903	0.0185864	0.0464325	0.0250084	BMP2/BMP6	2
BP	GO:0010454	negative regulation of cell fate commitment	2/337	12/18903	0.0185864	0.0464325	0.0250084	TNFSF18/DKK1	2
BP	GO:0014842	regulation of skeletal muscle satellite cell proliferation	2/337	12/18903	0.0185864	0.0464325	0.0250084	PPARD/ANGPT1	2
BP	GO:0021979	hypothalamus cell differentiation	2/337	12/18903	0.0185864	0.0464325	0.0250084	NRP2/SEMA3E	2
BP	GO:0031650	regulation of heat generation	2/337	12/18903	0.0185864	0.0464325	0.0250084	TNF/IL1B	2
BP	GO:0031953	negative regulation of protein autophosphorylation	2/337	12/18903	0.0185864	0.0464325	0.0250084	PTPRC/ADIPOQ	2
BP	GO:0032490	detection of molecule of bacterial origin	2/337	12/18903	0.0185864	0.0464325	0.0250084	TLR4/DMBT1	2
BP	GO:0033083	regulation of immature T cell proliferation	2/337	12/18903	0.0185864	0.0464325	0.0250084	IL1B/IL1A	2
BP	GO:0033084	regulation of immature T cell proliferation in thymus	2/337	12/18903	0.0185864	0.0464325	0.0250084	IL1B/IL1A	2
BP	GO:0034145	positive regulation of toll-like receptor 4 signaling pathway	2/337	12/18903	0.0185864	0.0464325	0.0250084	LTF/CD14	2
BP	GO:0035815	positive regulation of renal sodium excretion	2/337	12/18903	0.0185864	0.0464325	0.0250084	AGT/TACR1	2
BP	GO:0042416	dopamine biosynthetic process	2/337	12/18903	0.0185864	0.0464325	0.0250084	TGFB2/NR4A2	2
BP	GO:0042756	drinking behavior	2/337	12/18903	0.0185864	0.0464325	0.0250084	AGT/TACR1	2
BP	GO:0043312	neutrophil degranulation	2/337	12/18903	0.0185864	0.0464325	0.0250084	SYK/PTAFR	2
BP	GO:0046549	retinal cone cell development	2/337	12/18903	0.0185864	0.0464325	0.0250084	THRB/RORB	2
BP	GO:0070943	neutrophil-mediated killing of symbiont cell	2/337	12/18903	0.0185864	0.0464325	0.0250084	CTSG/AZU1	2
BP	GO:1900227	positive regulation of NLRP3 inflammasome complex assembly	2/337	12/18903	0.0185864	0.0464325	0.0250084	TLR4/PLCG2	2
BP	GO:1900272	negative regulation of long-term synaptic potentiation	2/337	12/18903	0.0185864	0.0464325	0.0250084	CX3CR1/PTN	2
BP	GO:1902337	regulation of apoptotic process involved in morphogenesis	2/337	12/18903	0.0185864	0.0464325	0.0250084	BMP7/TGFB2	2
BP	GO:1903977	positive regulation of glial cell migration	2/337	12/18903	0.0185864	0.0464325	0.0250084	CX3CR1/CSF1	2
BP	GO:2000317	negative regulation of T-helper 17 type immune response	2/337	12/18903	0.0185864	0.0464325	0.0250084	TNFSF18/IL4	2
BP	GO:2000508	regulation of dendritic cell chemotaxis	2/337	12/18903	0.0185864	0.0464325	0.0250084	TNFSF18/CCL21	2
BP	GO:0032768	regulation of monooxygenase activity	4/337	57/18903	0.0186909	0.0466095	0.0251037	TNF/IL1B/IL1A/LEP	4
BP	GO:0045071	negative regulation of viral genome replication	4/337	57/18903	0.0186909	0.0466095	0.0251037	SLPI/LTF/TNF/CCL5	4
BP	GO:1903053	regulation of extracellular matrix organization	4/337	57/18903	0.0186909	0.0466095	0.0251037	AGT/BMP2/ANGPTL7/IL6	4
BP	GO:0032092	positive regulation of protein binding	5/337	86/18903	0.0188187	0.0468719	0.0252451	B2M/BMP2/CSF3/WNT5A/BDNF	5
BP	GO:0033273	response to vitamin	5/337	86/18903	0.0188187	0.0468719	0.0252451	PPARD/IL1A/BMP7/EPO/LEP	5
BP	GO:0043304	regulation of mast cell degranulation	3/337	32/18903	0.0190112	0.0472665	0.0254576	SYK/IL4/IL13	3
BP	GO:0048710	regulation of astrocyte differentiation	3/337	32/18903	0.0190112	0.0472665	0.0254576	BMP2/NR2E1/IL6	3
BP	GO:1990776	response to angiotensin	3/337	32/18903	0.0190112	0.0472665	0.0254576	AGT/CYBB/AGTR1	3
BP	GO:0019751	polyol metabolic process	6/337	118/18903	0.0191559	0.0475977	0.025636	CD244/PTAFR/GPER1/ADCYAP1R1/PLCG2/LEP	6
BP	GO:0048145	regulation of fibroblast proliferation	5/337	87/18903	0.0196842	0.0488521	0.0263116	CD74/AGT/IGF1/WNT5A/IL13	5
BP	GO:2000243	positive regulation of reproductive process	5/337	87/18903	0.0196842	0.0488521	0.0263116	PTAFR/TACR1/DEFB1/FGF9/WNT5A	5
BP	GO:0006006	glucose metabolic process	8/337	188/18903	0.0197827	0.0490553	0.026421	PPARD/RORC/IGF1/TNF/APOD/RORA/LEP/ADIPOQ	8
BP	GO:0048010	vascular endothelial growth factor receptor signaling pathway	4/337	58/18903	0.0198015	0.0490553	0.026421	IL1B/VAV2/FGF9/PGF	4
BP	GO:0060350	endochondral bone morphogenesis	4/337	58/18903	0.0198015	0.0490553	0.026421	RARB/BMPR1B/BMP6/NPPC	4
BP	GO:0015718	monocarboxylic acid transport	6/337	119/18903	0.0198813	0.0492238	0.0265118	SYK/TNF/IL1B/NR0B2/IL1A/LEP	6
BP	GO:0030902	hindbrain development	7/337	153/18903	0.0200174	0.0495313	0.0266774	SSTR1/EGF/CD3E/FCGR2B/GDF10/BMP7/RORA	7
BP	GO:0043588	skin development	11/337	302/18903	0.0201109	0.0497329	0.026786	REG3G/MET/TNF/LTB/IL1A/TGFB2/TNFRSF19/DKK1/WNT5A/GAL/LGR5	11
CC	GO:0009897	external side of plasma membrane	62/338	462/19869	1.51955e-37	4.46747e-35	3.56694e-35	HLA-E/B2M/HLA-F/CD79A/CX3CR1/CD74/PTPRC/XCR1/HLA-G/CD40LG/ITGAL/AZGP1/IL2RB/PRLR/CCR5/CD1C/EBI3/CSF2RA/CSF2RB/CD48/TLR4/CD1E/CXCR6/TNF/CD244/CD4/IL2RG/MICB/CCR4/CSF3R/CD1B/CCR3/CXCR3/CD14/IGHD/ACKR4/IL12B/PDCD1/CD3E/COLEC10/FASLG/TNFRSF18/FCGR2B/IL5RA/KLRC3/CCR9/FGA/CD3G/IGKC/KLRC4/FCN2/CD1A/CRLF1/CNTFR/TFR2/IL13/ULBP3/ULBP1/RAET1E/IL31RA/MBL2/UMODL1	62
CC	GO:0042611	MHC protein complex	15/338	25/19869	5.94509e-21	8.73929e-19	6.97766e-19	HLA-E/HLA-B/B2M/HLA-F/HLA-C/HLA-A/HLA-DPA1/HLA-DPB1/CD74/HLA-DOA/HLA-DQA1/HLA-DRA/HLA-DMA/HLA-G/HLA-DQB1	15
CC	GO:0030139	endocytic vesicle	34/338	343/19869	1.20948e-16	1.18529e-14	9.46368e-15	HLA-E/HLA-B/B2M/HLA-F/HLA-C/HLA-A/HLA-DPA1/HLA-DPB1/CD74/HLA-DQA1/HLA-DRA/TGFA/HLA-G/EGF/HLA-DQB1/SYK/TLR7/LTF/COLEC12/CTSS/CD4/CYBB/CSF3R/GNLY/DMBT1/CD3G/VIM/CSF3/WNT5A/SFTPD/SLC11A1/AREG/MPO/MARCO	34
CC	GO:0030666	endocytic vesicle membrane	25/338	194/19869	3.61894e-15	2.65992e-13	2.12375e-13	HLA-E/HLA-B/B2M/HLA-F/HLA-C/HLA-A/HLA-DPA1/HLA-DPB1/CD74/HLA-DQA1/HLA-DRA/TGFA/HLA-G/EGF/HLA-DQB1/COLEC12/CD4/CYBB/CSF3R/DMBT1/CD3G/WNT5A/SLC11A1/AREG/MARCO	25
CC	GO:0071556	integral component of lumenal side of endoplasmic reticulum membrane	12/338	29/19869	1.93634e-14	9.48808e-13	7.57552e-13	HLA-E/HLA-B/HLA-F/HLA-C/HLA-A/HLA-DPA1/HLA-DPB1/CD74/HLA-DQA1/HLA-DRA/HLA-G/HLA-DQB1	12
CC	GO:0098553	lumenal side of endoplasmic reticulum membrane	12/338	29/19869	1.93634e-14	9.48808e-13	7.57552e-13	HLA-E/HLA-B/HLA-F/HLA-C/HLA-A/HLA-DPA1/HLA-DPB1/CD74/HLA-DQA1/HLA-DRA/HLA-G/HLA-DQB1	12
CC	GO:0012507	ER to Golgi transport vesicle membrane	15/338	63/19869	1.23899e-13	5.20378e-12	4.15482e-12	HLA-E/HLA-B/B2M/HLA-F/HLA-C/HLA-A/HLA-DPA1/HLA-DPB1/CD74/HLA-DQA1/HLA-DRA/TGFA/HLA-G/HLA-DQB1/AREG	15
CC	GO:0098576	lumenal side of membrane	12/338	35/19869	2.84116e-13	1.04413e-11	8.33656e-12	HLA-E/HLA-B/HLA-F/HLA-C/HLA-A/HLA-DPA1/HLA-DPB1/CD74/HLA-DQA1/HLA-DRA/HLA-G/HLA-DQB1	12
CC	GO:0042613	MHC class II protein complex	9/338	17/19869	2.31429e-12	7.56003e-11	6.03611e-11	B2M/HLA-DPA1/HLA-DPB1/CD74/HLA-DOA/HLA-DQA1/HLA-DRA/HLA-DMA/HLA-DQB1	9
CC	GO:0030134	COPII-coated ER to Golgi transport vesicle	15/338	95/19869	6.85094e-11	2.01418e-09	1.60817e-09	HLA-E/HLA-B/B2M/HLA-F/HLA-C/HLA-A/HLA-DPA1/HLA-DPB1/CD74/HLA-DQA1/HLA-DRA/TGFA/HLA-G/HLA-DQB1/AREG	15
CC	GO:0045335	phagocytic vesicle	17/338	139/19869	2.34469e-10	6.25242e-09	4.99209e-09	HLA-E/HLA-B/B2M/HLA-F/HLA-C/HLA-A/HLA-G/SYK/TLR7/LTF/CTSS/CYBB/GNLY/DMBT1/VIM/SLC11A1/MPO	17
CC	GO:0098802	plasma membrane signaling receptor complex	25/338	319/19869	2.55201e-10	6.25242e-09	4.99209e-09	B2M/CD79A/CALCR/ITGAL/IL2RB/SYK/CSF2RA/CSF2RB/CD247/ACVR1C/CD4/HTR3A/BMP2/BMPR1B/AMHR2/CD3E/TRAV8-3/TRAC/TRAV12-2/CD3G/TRBV27/CNTFR/TFR2/IL18R1/IL6	25
CC	GO:0030662	coated vesicle membrane	19/338	198/19869	1.35402e-09	3.06217e-08	2.44491e-08	HLA-E/HLA-B/B2M/HLA-F/HLA-C/HLA-A/HLA-DPA1/HLA-DPB1/CD74/HLA-DQA1/HLA-DRA/TGFA/HLA-G/EGF/HLA-DQB1/CD4/CD3G/WNT5A/AREG	19
CC	GO:0060205	cytoplasmic vesicle lumen	24/338	325/19869	1.94134e-09	4.07681e-08	3.25503e-08	SLPI/B2M/HGF/A2M/EGF/LCN2/CTSG/IGF1/LTF/LYZ/ALB/FASLG/PCSK1/C3/ORM1/FGA/TGFB2/PTX3/PRTN3/AZU1/MPO/RNASE2/DEFA4/CXCL1	24
CC	GO:0031983	vesicle lumen	24/338	327/19869	2.19305e-09	4.29838e-08	3.43193e-08	SLPI/B2M/HGF/A2M/EGF/LCN2/CTSG/IGF1/LTF/LYZ/ALB/FASLG/PCSK1/C3/ORM1/FGA/TGFB2/PTX3/PRTN3/AZU1/MPO/RNASE2/DEFA4/CXCL1	24
CC	GO:0030669	clathrin-coated endocytic vesicle membrane	12/338	72/19869	2.97643e-09	5.4692e-08	4.36674e-08	HLA-DPA1/HLA-DPB1/CD74/HLA-DQA1/HLA-DRA/TGFA/EGF/HLA-DQB1/CD4/CD3G/WNT5A/AREG	12
CC	GO:0045334	clathrin-coated endocytic vesicle	13/338	90/19869	4.01928e-09	6.95099e-08	5.54984e-08	HLA-DPA1/HLA-DPB1/CD74/HLA-DQA1/HLA-DRA/TGFA/EGF/HLA-DQB1/CD4/CD3G/WNT5A/SFTPD/AREG	13
CC	GO:0062023	collagen-containing extracellular matrix	27/338	433/19869	7.307e-09	1.19348e-07	9.52901e-08	SLPI/A2M/SDC3/AZGP1/ANGPT1/AGT/CTSG/CTSS/CMA1/IL7/ORM1/FGA/FCN2/GDF10/BMP7/TGFB2/LTBP1/PRTN3/INHBE/WNT5A/ANGPTL4/SEMA3B/ANGPTL7/ELN/TNC/MBL2/ADIPOQ	27
CC	GO:0034774	secretory granule lumen	23/338	322/19869	8.00038e-09	1.23795e-07	9.88412e-08	SLPI/B2M/HGF/A2M/EGF/LCN2/CTSG/IGF1/LTF/LYZ/ALB/PCSK1/C3/ORM1/FGA/TGFB2/PTX3/PRTN3/AZU1/MPO/RNASE2/DEFA4/CXCL1	23
CC	GO:0030133	transport vesicle	26/338	423/19869	1.87714e-08	2.7594e-07	2.20317e-07	HLA-E/HLA-B/B2M/HLA-F/HLA-C/HLA-A/HLA-DPA1/HLA-DPB1/CD74/IL33/PCSK2/SORT1/HLA-DQA1/HLA-DRA/TGFA/HLA-G/HLA-DQB1/SLC40A1/IGF1/PCSK1/NTF3/OPRK1/VGF/AREG/BDNF/DEFA4	26
CC	GO:0030135	coated vesicle	21/338	310/19869	8.96784e-08	1.2555e-06	1.00242e-06	HLA-E/HLA-B/B2M/HLA-F/HLA-C/HLA-A/HLA-DPA1/HLA-DPB1/CD74/SORT1/HLA-DQA1/HLA-DRA/TGFA/HLA-G/EGF/HLA-DQB1/CD4/CD3G/WNT5A/SFTPD/AREG	21
CC	GO:0030670	phagocytic vesicle membrane	10/338	77/19869	7.10058e-07	9.48896e-06	7.57622e-06	HLA-E/HLA-B/B2M/HLA-F/HLA-C/HLA-A/HLA-G/CYBB/DMBT1/SLC11A1	10
CC	GO:0045121	membrane raft	20/338	326/19869	8.79898e-07	1.12474e-05	8.9802e-06	CD79A/PTPRC/INPP5D/BTK/SDC4/TEK/OLR1/ANGPT1/CD48/LCP2/TNF/CD4/CD14/FASLG/LCK/CD1A/ADCYAP1R1/MAPT/PRTN3/CBLC	20
CC	GO:0098857	membrane microdomain	20/338	327/19869	9.22906e-07	1.13056e-05	9.02667e-06	CD79A/PTPRC/INPP5D/BTK/SDC4/TEK/OLR1/ANGPT1/CD48/LCP2/TNF/CD4/CD14/FASLG/LCK/CD1A/ADCYAP1R1/MAPT/PRTN3/CBLC	20
CC	GO:0035580	specific granule lumen	9/338	62/19869	9.84651e-07	1.15795e-05	9.24535e-06	SLPI/B2M/LCN2/LTF/LYZ/ORM1/PTX3/DEFA4/CXCL1	9
CC	GO:0030658	transport vesicle membrane	16/338	222/19869	1.3937e-06	1.57595e-05	1.25828e-05	HLA-E/HLA-B/B2M/HLA-F/HLA-C/HLA-A/HLA-DPA1/HLA-DPB1/CD74/HLA-DQA1/HLA-DRA/TGFA/HLA-G/HLA-DQB1/OPRK1/AREG	16
CC	GO:0005775	vacuolar lumen	14/338	176/19869	2.00859e-06	2.18714e-05	1.74626e-05	CD74/SDC3/SDC4/CTSG/CD1E/LYZ/CTSS/FASLG/C3/CSF3/PRTN3/AZU1/MPO/RNASE2	14
CC	GO:0030665	clathrin-coated vesicle membrane	12/338	132/19869	2.71682e-06	2.85266e-05	2.27763e-05	HLA-DPA1/HLA-DPB1/CD74/HLA-DQA1/HLA-DRA/TGFA/EGF/HLA-DQB1/CD4/CD3G/WNT5A/AREG	12
CC	GO:0030176	integral component of endoplasmic reticulum membrane	13/338	164/19869	4.84471e-06	4.91153e-05	3.92149e-05	HLA-E/HLA-B/B2M/HLA-F/HLA-C/HLA-A/HLA-DPA1/HLA-DPB1/CD74/HLA-DQA1/HLA-DRA/HLA-G/HLA-DQB1	13
CC	GO:0043020	NADPH oxidase complex	5/338	17/19869	7.23429e-06	7.08961e-05	5.66052e-05	DUOX2/CYBB/NOX4/RAC3/NOX3	5
CC	GO:0031227	intrinsic component of endoplasmic reticulum membrane	13/338	172/19869	8.15548e-06	7.73455e-05	6.17546e-05	HLA-E/HLA-B/B2M/HLA-F/HLA-C/HLA-A/HLA-DPA1/HLA-DPB1/CD74/HLA-DQA1/HLA-DRA/HLA-G/HLA-DQB1	13
CC	GO:0030136	clathrin-coated vesicle	14/338	211/19869	1.63292e-05	0.000150024	0.000119783	HLA-DPA1/HLA-DPB1/CD74/SORT1/HLA-DQA1/HLA-DRA/TGFA/EGF/HLA-DQB1/CD4/CD3G/WNT5A/SFTPD/AREG	14
CC	GO:0031093	platelet alpha granule lumen	8/338	67/19869	1.75843e-05	0.00015666	0.000125081	HGF/A2M/EGF/IGF1/ALB/ORM1/FGA/TGFB2	8
CC	GO:0042581	specific granule	12/338	160/19869	1.96129e-05	0.000169594	0.000135408	SLPI/B2M/ITGAL/OLR1/LCN2/LTF/LYZ/CYBB/ORM1/PTX3/DEFA4/CXCL1	12
CC	GO:0042105	alpha-beta T cell receptor complex	4/338	11/19869	2.47041e-05	0.000204917	0.000163611	CD247/CD3E/TRAC/CD3G	4
CC	GO:0070820	tertiary granule	12/338	164/19869	2.50919e-05	0.000204917	0.000163611	B2M/OLR1/LTF/LYZ/PTAFR/CTSS/CYBB/FPR1/ORM1/PTX3/SLC11A1/CXCL1	12
CC	GO:0005788	endoplasmic reticulum lumen	17/338	312/19869	2.72824e-05	0.000216784	0.000173086	B2M/EBI3/CHGB/CSF1/CD4/ALB/IL12B/FLT3/C3/FGA/PDIA2/LTBP1/VGF/WNT5A/SERPIND1/IL6/TNC	17
CC	GO:1904724	tertiary granule lumen	7/338	55/19869	3.90003e-05	0.000294709	0.000235303	B2M/LTF/LYZ/CTSS/ORM1/PTX3/CXCL1	7
CC	GO:0072562	blood microparticle	11/338	145/19869	3.90941e-05	0.000294709	0.000235303	A2M/AGT/ALB/IGHD/HSPA2/C3/ORM1/FGA/IGKC/FCN2/ANGPTL4	11
CC	GO:0031091	platelet alpha granule	8/338	91/19869	0.000160972	0.00118314	0.000944652	HGF/A2M/EGF/IGF1/ALB/ORM1/FGA/TGFB2	8
CC	GO:0031904	endosome lumen	5/338	35/19869	0.000295196	0.00211677	0.00169008	B2M/PRLR/CTSS/IL12B/PRL	5
CC	GO:0032588	trans-Golgi network membrane	8/338	101/19869	0.000330579	0.00231405	0.00184759	HLA-DPA1/HLA-DPB1/CD74/HLA-DQA1/HLA-DRA/HLA-DQB1/LGR6/LGR5	8
CC	GO:0071682	endocytic vesicle lumen	4/338	23/19869	0.000564087	0.00385678	0.00307935	LTF/GNLY/CSF3/MPO	4
CC	GO:0055037	recycling endosome	11/338	198/19869	0.000603934	0.00403538	0.00322195	HLA-E/HLA-B/B2M/HLA-F/HLA-C/HLA-A/HLA-G/LTF/TNF/GPER1/ACKR4	11
CC	GO:0005581	collagen trimer	7/338	86/19869	0.000658956	0.00430518	0.00343736	COLEC12/COLEC10/FCN2/SFTPD/MBL2/ADIPOQ/MARCO	7
CC	GO:1905370	serine-type endopeptidase complex	3/338	11/19869	0.000727468	0.00464947	0.00371225	COLEC10/FCN2/MBL2	3
CC	GO:0035578	azurophil granule lumen	7/338	91/19869	0.000923542	0.00577705	0.00461254	CTSG/LYZ/C3/PRTN3/AZU1/MPO/RNASE2	7
CC	GO:0042101	T cell receptor complex	9/338	147/19869	0.000946173	0.00579531	0.00462712	SYK/CD247/CD4/CD3E/TRAV8-3/TRAC/TRAV12-2/CD3G/TRBV27	9
CC	GO:0001772	immunological synapse	5/338	45/19869	0.000966984	0.0058019	0.00463238	HLA-DRA/VAV3/CD3E/LCK/PRKCQ	5
CC	GO:1905286	serine-type peptidase complex	3/338	13/19869	0.00122947	0.00722929	0.00577204	COLEC10/FCN2/MBL2	3
CC	GO:0055038	recycling endosome membrane	7/338	97/19869	0.0013444	0.00761566	0.00608053	HLA-E/HLA-B/B2M/HLA-F/HLA-C/HLA-A/HLA-G	7
CC	GO:0005766	primary lysosome	9/338	155/19869	0.00137289	0.00761566	0.00608053	CTSG/LYZ/FPR1/C3/PRTN3/AZU1/MPO/RNASE2/DEFA4	9
CC	GO:0042582	azurophil granule	9/338	155/19869	0.00137289	0.00761566	0.00608053	CTSG/LYZ/FPR1/C3/PRTN3/AZU1/MPO/RNASE2/DEFA4	9
CC	GO:0043202	lysosomal lumen	7/338	98/19869	0.00142712	0.00776989	0.00620367	CD74/SDC3/SDC4/CD1E/CTSS/FASLG/CSF3	7
CC	GO:0005769	early endosome	16/338	414/19869	0.00206305	0.0110279	0.00880498	HLA-E/HLA-B/B2M/HLA-F/HLA-C/HLA-A/SORT1/HLA-DRA/HLA-G/TLR4/LTF/CD1E/CD4/GPER1/ACKR4/DKK1	16
CC	GO:0005765	lysosomal membrane	16/338	418/19869	0.00227082	0.0117126	0.00935165	HLA-F/HLA-DPA1/HLA-DPB1/CD74/HLA-DOA/SORT1/HLA-DQA1/HLA-DRA/HLA-DMA/EGF/HLA-DQB1/TLR7/CSF3R/CD1B/FPR1/AZU1	16
CC	GO:0098852	lytic vacuole membrane	16/338	418/19869	0.00227082	0.0117126	0.00935165	HLA-F/HLA-DPA1/HLA-DPB1/CD74/HLA-DOA/SORT1/HLA-DQA1/HLA-DRA/HLA-DMA/EGF/HLA-DQB1/TLR7/CSF3R/CD1B/FPR1/AZU1	16
CC	GO:0005774	vacuolar membrane	17/338	461/19869	0.00247117	0.0125263	0.0100013	HLA-F/HLA-DPA1/HLA-DPB1/CD74/HLA-DOA/SORT1/HLA-DQA1/HLA-DRA/HLA-DMA/EGF/HLA-DQB1/TLR7/CSF3R/CD1B/FPR1/SLC22A17/AZU1	17
CC	GO:0030667	secretory granule membrane	13/338	313/19869	0.00287039	0.0143033	0.0114201	HLA-B/HLA-C/PTPRC/ITGAL/OLR1/PTAFR/CYBB/DMBT1/CD14/FPR1/VGF/SLC11A1/AZU1	13
CC	GO:0031301	integral component of organelle membrane	15/338	390/19869	0.00294411	0.0144261	0.0115182	HLA-E/HLA-B/B2M/HLA-F/HLA-C/HLA-A/HLA-DPA1/HLA-DPB1/CD74/HLA-DQA1/HLA-DRA/HLA-G/HLA-DQB1/OPRK1/SLC22A17	15
CC	GO:0031901	early endosome membrane	9/338	183/19869	0.00420908	0.0202864	0.0161972	HLA-E/HLA-B/B2M/HLA-F/HLA-C/HLA-A/HLA-DRA/HLA-G/DKK1	9
CC	GO:0043025	neuronal cell body	17/338	497/19869	0.00524741	0.0248829	0.0198671	CX3CR1/PCSK2/NPY/TNF/CYBB/CCR4/PCSK1/OPRK1/TGFB2/APOD/VGF/MAPT/AGRP/GAL/RAC3/TUBB3/INHA	17
CC	GO:0031300	intrinsic component of organelle membrane	15/338	420/19869	0.00579988	0.0270661	0.0216103	HLA-E/HLA-B/B2M/HLA-F/HLA-C/HLA-A/HLA-DPA1/HLA-DPB1/CD74/HLA-DQA1/HLA-DRA/HLA-G/HLA-DQB1/OPRK1/SLC22A17	15
CC	GO:0005796	Golgi lumen	6/338	106/19869	0.00954322	0.0438392	0.0350023	SDC3/SDC4/DEFB1/AGRP/WNT5A/DEFA4	6
MF	GO:0048018	receptor ligand activity	104/336	491/18432	1.2132e-82	5.48365e-80	3.90777e-80	PROK1/HGF/IL33/TGFA/ENDOU/TNFSF8/CD40LG/EGF/CCL17/IL16/KITLG/CCL2/EBI3/CHGB/CCL7/NRG1/CCL19/AGT/TNFSF18/NPY/CTSG/IGF1/CSF1/TNF/NRG4/LTB/SEMA6A/BMP2/FGF1/CCK/IL1B/SEMA3E/IL7/CCL11/SLURP1/IL12B/XCL1/CXCL3/COLEC10/FASLG/GUCA2A/CCL21/CCL5/CXCL5/NTF3/IL1A/SCT/GDF10/GREM2/THPO/CRLF1/TNFSF4/BMP7/BMP6/IL11/TGFB2/LEFTY1/SEMA6B/BMP1/PYY/VGF/CMTM3/ADM2/FGF9/PTN/IL17D/GDF2/NPPC/TNFSF13B/FGF12/OSGIN1/DKK1/AGR…	104
MF	GO:0030546	signaling receptor activator activity	104/336	498/18432	5.778e-82	1.30583e-79	9.30562e-80	PROK1/HGF/IL33/TGFA/ENDOU/TNFSF8/CD40LG/EGF/CCL17/IL16/KITLG/CCL2/EBI3/CHGB/CCL7/NRG1/CCL19/AGT/TNFSF18/NPY/CTSG/IGF1/CSF1/TNF/NRG4/LTB/SEMA6A/BMP2/FGF1/CCK/IL1B/SEMA3E/IL7/CCL11/SLURP1/IL12B/XCL1/CXCL3/COLEC10/FASLG/GUCA2A/CCL21/CCL5/CXCL5/NTF3/IL1A/SCT/GDF10/GREM2/THPO/CRLF1/TNFSF4/BMP7/BMP6/IL11/TGFB2/LEFTY1/SEMA6B/BMP1/PYY/VGF/CMTM3/ADM2/FGF9/PTN/IL17D/GDF2/NPPC/TNFSF13B/FGF12/OSGIN1/DKK1/AGR…	104
MF	GO:0005125	cytokine activity	58/336	237/18432	6.00613e-49	9.04924e-47	6.44869e-47	IL33/TNFSF8/CD40LG/CCL17/IL16/KITLG/CCL2/EBI3/CCL7/NRG1/CCL19/TNFSF18/CSF1/TNF/LTB/BMP2/IL1B/IL7/CCL11/SLURP1/IL12B/XCL1/CXCL3/FASLG/CCL21/CCL5/CXCL5/IL1A/GDF10/GREM2/THPO/CRLF1/TNFSF4/BMP7/BMP6/IL11/TGFB2/LEFTY1/BMP1/CMTM3/IL17D/GDF2/TNFSF13B/CSF3/CCL22/INHBE/WNT5A/AREG/IL4/EPO/NODAL/IL13/INHA/IL6/IL34/CCL18/ADIPOQ/CXCL1	58
MF	GO:0008083	growth factor activity	46/336	162/18432	4.46507e-42	5.04552e-40	3.59555e-40	PROK1/HGF/TGFA/ENDOU/EGF/KITLG/NRG1/AGT/IGF1/CSF1/NRG4/BMP2/FGF1/IL7/IL12B/NTF3/GDF10/THPO/BMP7/BMP6/IL11/TGFB2/LEFTY1/BMP1/VGF/FGF9/PTN/GDF2/FGF12/OSGIN1/DKK1/CSF3/PGF/FGF8/INHBE/ARTN/FGF17/AREG/FGF21/IL4/NODAL/BDNF/INHA/IL6/IL34/CXCL1	46
MF	GO:0005126	cytokine receptor binding	47/336	273/18432	3.50655e-32	3.16992e-30	2.25896e-30	CX3CR1/IL33/TNFSF8/CD40LG/CCL17/KITLG/SYK/PRLR/CCL2/EBI3/CCL7/CCL19/TNFSF18/CSF1/TNF/LTB/IL1B/DEFB1/IL7/CCL11/IL12B/XCL1/CXCL3/FASLG/CCL21/CCL5/CXCL5/NTF3/IL1A/CRLF1/TNFSF4/IL11/TGFB2/LEFTY1/TNFSF13B/CSF3/PGF/CCL22/IL4/EPO/BDNF/IL13/IL6/IL34/PRL/CCL18/CXCL1	47
MF	GO:0140375	immune receptor activity	37/336	148/18432	1.05214e-31	7.92609e-30	5.64831e-30	HLA-DPA1/CX3CR1/CD74/HLA-DOA/HLA-DQA1/HLA-DRA/XCR1/HLA-DQB1/IL2RB/PRLR/CCR5/EBI3/CSF2RA/IL10RA/CSF2RB/CR2/CXCR6/CD4/GPR32/IL2RG/CCR4/CSF3R/CCR3/CXCR3/ACKR4/IL12B/FPR1/FCGR2B/IL5RA/FLT3/CCR9/CRLF1/CNTFR/IL18R1/IL1R2/IL31RA/IL1RL2	37
MF	GO:0008528	G protein-coupled peptide receptor activity	35/336	147/18432	3.09037e-29	1.99549e-27	1.42203e-27	SSTR1/CX3CR1/CYSLTR1/CYSLTR2/XCR1/CALCR/CCR5/CXCR6/GPR32/TACR1/CCR4/CCR3/CXCR3/VIPR2/SCTR/ACKR4/FPR1/MC4R/CCR9/OPRK1/SSTR5/LTB4R/ADCYAP1R1/MC2R/RXFP3/LTB4R2/OPRL1/TSHR/GAL/GIPR/AGTR1/GHRHR/GALR3/GCGR/GLP2R	35
MF	GO:0001653	peptide receptor activity	35/336	153/18432	1.37366e-28	7.76118e-27	5.53079e-27	SSTR1/CX3CR1/CYSLTR1/CYSLTR2/XCR1/CALCR/CCR5/CXCR6/GPR32/TACR1/CCR4/CCR3/CXCR3/VIPR2/SCTR/ACKR4/FPR1/MC4R/CCR9/OPRK1/SSTR5/LTB4R/ADCYAP1R1/MC2R/RXFP3/LTB4R2/OPRL1/TSHR/GAL/GIPR/AGTR1/GHRHR/GALR3/GCGR/GLP2R	35
MF	GO:0004896	cytokine receptor activity	28/336	97/18432	3.84491e-26	1.931e-24	1.37607e-24	CX3CR1/CD74/XCR1/IL2RB/PRLR/CCR5/EBI3/CSF2RA/IL10RA/CSF2RB/CXCR6/CD4/IL2RG/CCR4/CSF3R/CCR3/CXCR3/ACKR4/IL12B/IL5RA/FLT3/CCR9/CRLF1/CNTFR/IL18R1/IL1R2/IL31RA/IL1RL2	28
MF	GO:0019955	cytokine binding	32/336	144/18432	8.62098e-26	3.89668e-24	2.77686e-24	CX3CR1/CD74/XCR1/A2M/IL2RB/PRLR/CCR5/EBI3/CSF2RA/IL10RA/CXCR6/NRP2/CSF1R/CD4/IL2RG/CCR4/CSF3R/CCR3/BMPR1B/CXCR3/ACKR4/IL12B/IL5RA/CCR9/GREM2/CRLF1/CNTFR/LTBP1/WFIKKN1/IL18R1/IL1R2/IL31RA	32
MF	GO:0042277	peptide binding	41/336	330/18432	1.66161e-22	6.82771e-21	4.86558e-21	HLA-E/HLA-B/HLA-F/HLA-C/HLA-A/SSTR1/HLA-DPA1/HLA-DPB1/CD74/HLA-DQA1/HLA-DRA/HLA-G/CALCR/HLA-DQB1/PRLR/CD1C/EBI3/SLC40A1/TLR4/CD1E/CMA1/CD1B/CD14/VIPR2/SCTR/FCGR2B/MC4R/TRAV12-2/OPRK1/SSTR5/CD1A/TGFB2/ADCYAP1R1/OPRL1/GIPR/TUBB3/GHRHR/GALR3/GCGR/MARCO/GLP2R	41
MF	GO:0033218	amide binding	42/336	408/18432	6.91252e-20	2.60372e-18	1.85547e-18	HLA-E/HLA-B/HLA-F/HLA-C/HLA-A/SSTR1/HLA-DPA1/HLA-DPB1/CD74/HLA-DQA1/HLA-DRA/HLA-G/CALCR/HLA-DQB1/PRLR/CD1C/EBI3/SLC40A1/TLR4/CD1E/CMA1/CD1B/CD14/VIPR2/SCTR/FCGR2B/MC4R/TRAV12-2/OPRK1/SSTR5/CD1A/TGFB2/ADCYAP1R1/OPRL1/GIPR/TUBB3/PLTP/GHRHR/GALR3/GCGR/MARCO/GLP2R	42
MF	GO:0005179	hormone activity	25/336	122/18432	1.81362e-19	6.30581e-18	4.49366e-18	CHGB/AGT/NPY/IGF1/CCK/GUCA2A/SCT/THPO/PYY/VGF/ADM2/NPPC/AGRP/INHBE/UTS2/GAL/UCN2/EPO/TRH/INHA/PRL/PPY/LEP/ADIPOQ/MLN	25
MF	GO:0001664	G protein-coupled receptor binding	29/336	289/18432	9.46843e-14	3.05695e-12	2.17845e-12	CX3CR1/CCL17/CCL2/CCL7/CCL19/AGT/NPY/DEFB1/CCL11/XCL1/CXCL3/CCL21/CCL5/FPR1/CXCL5/C3/SCT/PYY/AGRP/CCL22/WNT5A/GAL/UCN2/AGTR1/PPY/CCL18/CXCL1/MARCO/MLN	29
MF	GO:0070851	growth factor receptor binding	21/336	140/18432	1.06339e-13	3.20434e-12	2.28348e-12	TGFA/EGF/VAV3/FGF1/IL1B/IL7/IL12B/IL1A/VAV2/IL11/FGF9/CSF3/PGF/FGF8/ARTN/FGF17/AREG/FGF21/IL4/IL6/CBLC	21
MF	GO:0042562	hormone binding	17/336	87/18432	2.82104e-13	7.96945e-12	5.67921e-12	CALCR/PRLR/EBI3/SLC40A1/THRB/AMHR2/GPER1/VIPR2/SCTR/MC4R/ADCYAP1R1/GIPR/UCN2/GHRHR/GALR3/GCGR/GLP2R	17
MF	GO:0042605	peptide antigen binding	12/336	37/18432	1.36329e-12	3.62474e-11	2.58307e-11	HLA-E/HLA-B/HLA-F/HLA-C/HLA-A/HLA-DPA1/HLA-DPB1/HLA-DQA1/HLA-DRA/HLA-G/HLA-DQB1/TRAV12-2	12
MF	GO:0042379	chemokine receptor binding	15/336	71/18432	2.17299e-12	5.45662e-11	3.88851e-11	CX3CR1/CCL17/CCL2/CCL7/CCL19/DEFB1/CCL11/XCL1/CXCL3/CCL21/CCL5/CXCL5/CCL22/CCL18/CXCL1	15
MF	GO:0008009	chemokine activity	13/336	49/18432	2.83455e-12	6.74325e-11	4.80539e-11	CCL17/CCL2/CCL7/CCL19/CCL11/XCL1/CXCL3/CCL21/CCL5/CXCL5/CCL22/CCL18/CXCL1	13
MF	GO:0003823	antigen binding	21/336	171/18432	5.73553e-12	1.29623e-10	9.23722e-11	HLA-E/HLA-B/HLA-F/HLA-C/HLA-A/HLA-DPA1/HLA-DPB1/HLA-DQA1/HLA-DRA/HLA-G/HLA-DQB1/CD1C/CD48/CD1E/CD1B/IGHD/KIR2DL3/TRAV12-2/IGKC/FCN2/CD1A	21
MF	GO:0017046	peptide hormone binding	13/336	52/18432	6.52556e-12	1.40455e-10	1.00091e-10	CALCR/PRLR/EBI3/SLC40A1/VIPR2/SCTR/MC4R/ADCYAP1R1/GIPR/GHRHR/GALR3/GCGR/GLP2R	13
MF	GO:0023026	MHC class II protein complex binding	10/336	27/18432	2.27251e-11	4.66897e-10	3.32721e-10	B2M/HLA-DPA1/HLA-DPB1/CD74/HLA-DOA/HLA-DQA1/HLA-DRA/HLA-DMA/HLA-DQB1/CD4	10
MF	GO:0016493	C-C chemokine receptor activity	9/336	23/18432	1.30409e-10	2.56282e-09	1.82632e-09	CX3CR1/XCR1/CCR5/CXCR6/CCR4/CCR3/CXCR3/ACKR4/CCR9	9
MF	GO:0019957	C-C chemokine binding	9/336	24/18432	2.05326e-10	3.86698e-09	2.7557e-09	CX3CR1/XCR1/CCR5/CXCR6/CCR4/CCR3/CXCR3/ACKR4/CCR9	9
MF	GO:0019956	chemokine binding	10/336	33/18432	2.26254e-10	4.09066e-09	2.9151e-09	CX3CR1/XCR1/A2M/CCR5/CXCR6/CCR4/CCR3/CXCR3/ACKR4/CCR9	10
MF	GO:0001637	G protein-coupled chemoattractant receptor activity	9/336	26/18432	4.75147e-10	7.95431e-09	5.66842e-09	CX3CR1/XCR1/CCR5/CXCR6/CCR4/CCR3/CXCR3/ACKR4/CCR9	9
MF	GO:0004950	chemokine receptor activity	9/336	26/18432	4.75147e-10	7.95431e-09	5.66842e-09	CX3CR1/XCR1/CCR5/CXCR6/CCR4/CCR3/CXCR3/ACKR4/CCR9	9
MF	GO:0023023	MHC protein complex binding	10/336	36/18432	5.91883e-10	9.48401e-09	6.75852e-09	B2M/HLA-DPA1/HLA-DPB1/CD74/HLA-DOA/HLA-DQA1/HLA-DRA/HLA-DMA/HLA-DQB1/CD4	10
MF	GO:0048020	CCR chemokine receptor binding	11/336	47/18432	6.08488e-10	9.48401e-09	6.75852e-09	CCL17/CCL2/CCL7/CCL19/DEFB1/CCL11/XCL1/CCL21/CCL5/CCL22/CCL18	11
MF	GO:0004879	nuclear receptor activity	11/336	52/18432	1.94549e-09	2.83665e-08	2.02146e-08	PPARD/RARB/RORC/THRB/RORA/NR2E1/RORB/NR4A2/NR4A3/HNF4G/PGR	11
MF	GO:0098531	ligand-activated transcription factor activity	11/336	52/18432	1.94549e-09	2.83665e-08	2.02146e-08	PPARD/RARB/RORC/THRB/RORA/NR2E1/RORB/NR4A2/NR4A3/HNF4G/PGR	11
MF	GO:0042608	T cell receptor binding	6/336	10/18432	6.93132e-09	9.79049e-08	6.97692e-08	HLA-E/HLA-A/HLA-DRA/CD3E/LCK/CD3G	6
MF	GO:0032813	tumor necrosis factor receptor superfamily binding	10/336	49/18432	1.55077e-08	2.12408e-07	1.51367e-07	TNFSF8/CD40LG/TNFSF18/TNF/LTB/FASLG/NTF3/TNFSF4/TNFSF13B/BDNF	10
MF	GO:0008201	heparin binding	17/336	171/18432	1.61238e-08	2.14351e-07	1.52751e-07	PTPRC/CCL7/CTSG/LTF/NRP2/LGR6/FGF1/GREM2/BMP7/SLIT2/SLIT1/FGF9/PTN/PGF/SERPIND1/AZU1/MPO	17
MF	GO:0005539	glycosaminoglycan binding	19/336	237/18432	7.66748e-08	9.902e-07	7.05638e-07	PTPRC/REG3G/CCL7/CTSG/LTF/NRP2/LGR6/FGF1/RNASE7/GREM2/BMP7/SLIT2/SLIT1/FGF9/PTN/PGF/SERPIND1/AZU1/MPO	19
MF	GO:0038187	pattern recognition receptor activity	7/336	27/18432	4.07814e-07	5.12033e-06	3.64886e-06	TLR4/TLR7/PTAFR/COLEC12/DMBT1/CD14/MARCO	7
MF	GO:0032395	MHC class II receptor activity	5/336	10/18432	4.56838e-07	5.43396e-06	3.87236e-06	HLA-DPA1/HLA-DOA/HLA-DQA1/HLA-DRA/HLA-DQB1	5
MF	GO:0071723	lipopeptide binding	5/336	10/18432	4.56838e-07	5.43396e-06	3.87236e-06	CD1C/CD1E/CD1B/CD14/CD1A	5
MF	GO:0005184	neuropeptide hormone activity	7/336	30/18432	8.91957e-07	1.03376e-05	7.36677e-06	NPY/CCK/PYY/VGF/AGRP/GAL/PPY	7
MF	GO:0005164	tumor necrosis factor receptor binding	7/336	31/18432	1.1342e-06	1.28164e-05	9.13328e-06	TNFSF8/CD40LG/TNF/LTB/FASLG/TNFSF4/TNFSF13B	7
MF	GO:0043394	proteoglycan binding	7/336	36/18432	3.32939e-06	3.67045e-05	2.61565e-05	PTPRC/CTSS/FCN2/SLIT2/SLIT1/AZU1/TNC	7
MF	GO:0004953	icosanoid receptor activity	5/336	15/18432	5.0496e-06	5.43433e-05	3.87263e-05	CYSLTR1/CYSLTR2/PTGDR/LTB4R/LTB4R2	5
MF	GO:0019838	growth factor binding	12/336	132/18432	5.45863e-06	5.73791e-05	4.08896e-05	SORT1/A2M/IL2RB/IL10RA/NRP2/ACVR1C/IL2RG/FLT3/LTBP1/WFIKKN1/IL1R2/GHRHR	12
MF	GO:0045499	chemorepellent activity	6/336	28/18432	9.42189e-06	9.67885e-05	6.89736e-05	NRG1/SEMA6A/SEMA3E/SEMA6B/SEMA6D/SEMA3B	6
MF	GO:1901681	sulfur compound binding	17/336	270/18432	1.01353e-05	0.000101803	7.25471e-05	PTPRC/CCL7/CTSG/LTF/NRP2/LGR6/FGF1/GREM2/BMP7/SLIT2/SLIT1/FGF9/PTN/PGF/SERPIND1/AZU1/MPO	17
MF	GO:0019199	transmembrane receptor protein kinase activity	9/336	79/18432	1.33925e-05	0.000131596	9.37781e-05	MET/TEK/NRP2/ACVR1C/CSF1R/BMPR1B/AMHR2/FLT3/LTBP1	9
MF	GO:0001784	phosphotyrosine residue binding	7/336	46/18432	1.82584e-05	0.000175591	0.00012513	SYK/SH3BP2/GRAP2/LCK/VAV2/PLCG2/CBLC	7
MF	GO:0016175	superoxide-generating NAD(P)H oxidase activity	4/336	10/18432	2.08867e-05	0.000196683	0.000140161	DUOX2/CYBB/NOX4/NOX3	4
MF	GO:0005154	epidermal growth factor receptor binding	6/336	33/18432	2.56513e-05	0.000231888	0.000165248	TGFA/EGF/VAV3/VAV2/AREG/CBLC	6
MF	GO:0042923	neuropeptide binding	6/336	33/18432	2.56513e-05	0.000231888	0.000165248	SSTR1/MC4R/OPRK1/SSTR5/ADCYAP1R1/OPRL1	6
MF	GO:0005504	fatty acid binding	7/336	49/18432	2.7962e-05	0.00024782	0.000176602	FABP3/PPARD/FABP2/RBP5/ALB/FABP6/FABP4	7
MF	GO:0042056	chemoattractant activity	6/336	36/18432	4.30815e-05	0.000367412	0.000261826	HGF/COLEC10/CCL5/NTF3/PGF/WNT5A	6
MF	GO:0071855	neuropeptide receptor binding	6/336	36/18432	4.30815e-05	0.000367412	0.000261826	NPY/PYY/AGRP/GAL/UCN2/PPY	6
MF	GO:0030295	protein kinase activator activity	10/336	115/18432	4.86045e-05	0.000406838	0.000289922	TGFA/CD40LG/EGF/NRG1/LTF/BMP2/BMPR1B/CCL5/AREG/EPO	10
MF	GO:0030215	semaphorin receptor binding	5/336	23/18432	5.01829e-05	0.000408717	0.000291261	SEMA6A/SEMA3E/SEMA6B/SEMA6D/SEMA3B	5
MF	GO:0001530	lipopolysaccharide binding	6/336	37/18432	5.06375e-05	0.000408717	0.000291261	TLR4/LTF/PTAFR/DEFB119/CD14/RNASE7	6
MF	GO:0003707	nuclear steroid receptor activity	5/336	24/18432	6.24469e-05	0.000495193	0.000352886	PPARD/GPER1/NR2E1/NR4A3/PGR	5
MF	GO:0019209	kinase activator activity	10/336	121/18432	7.49357e-05	0.000583981	0.000416158	TGFA/CD40LG/EGF/NRG1/LTF/BMP2/BMPR1B/CCL5/AREG/EPO	10
MF	GO:0005104	fibroblast growth factor receptor binding	5/336	25/18432	7.68991e-05	0.000589125	0.000419824	FGF1/FGF9/FGF8/FGF17/FGF21	5
MF	GO:0045309	protein phosphorylated amino acid binding	7/336	58/18432	8.50646e-05	0.00064082	0.000456663	SYK/SH3BP2/GRAP2/LCK/VAV2/PLCG2/CBLC	7
MF	GO:0030297	transmembrane receptor protein tyrosine kinase activator activity	4/336	14/18432	9.39666e-05	0.000696277	0.000496183	TGFA/EGF/NRG1/AREG	4
MF	GO:0048306	calcium-dependent protein binding	8/336	81/18432	0.000113512	0.000827542	0.000589725	A2M/S100A2/S100Z/DMBT1/FCN2/RAC3/S100G/MBL2	8
MF	GO:0036041	long-chain fatty acid binding	4/336	15/18432	0.0001263	0.000906153	0.000645745	FABP3/PPARD/FABP2/FABP4	4
MF	GO:0050664	oxidoreductase activity, acting on NAD(P)H, oxygen as acceptor	4/336	16/18432	0.000165988	0.00117229	0.000835402	DUOX2/CYBB/NOX4/NOX3	4
MF	GO:0008188	neuropeptide receptor activity	6/336	46/18432	0.000177764	0.00123615	0.000880905	SSTR1/TACR1/SSTR5/MC2R/GAL/GALR3	6
MF	GO:0030296	protein tyrosine kinase activator activity	5/336	30/18432	0.000191407	0.00131084	0.000934137	TGFA/EGF/NRG1/CCL5/AREG	5
MF	GO:0008236	serine-type peptidase activity	12/336	192/18432	0.000218247	0.00147235	0.00104923	PCSK2/ENDOU/CTSG/LTF/CTSS/CMA1/PCSK1/BMP1/PRTN3/MMP12/AZU1/TMPRSS6	12
MF	GO:0033612	receptor serine/threonine kinase binding	5/336	31/18432	0.000224834	0.00149448	0.001065	BMP2/OPRK1/BMP7/BMP6/NODAL	5
MF	GO:0051427	hormone receptor binding	5/336	32/18432	0.000262523	0.00170433	0.00121455	CCK/NPPC/UCN2/FABP4/LEP	5
MF	GO:0017171	serine hydrolase activity	12/336	196/18432	0.000263946	0.00170433	0.00121455	PCSK2/ENDOU/CTSG/LTF/CTSS/CMA1/PCSK1/BMP1/PRTN3/MMP12/AZU1/TMPRSS6	12
MF	GO:1990782	protein tyrosine kinase binding	9/336	119/18432	0.000333128	0.00212076	0.0015113	ANGPT1/NRG1/CD247/CD4/PLCG2/SHC4/ARTN/NOX4/CBLC	9
MF	GO:0004675	transmembrane receptor protein serine/threonine kinase activity	4/336	19/18432	0.000338546	0.00212532	0.00151455	ACVR1C/BMPR1B/AMHR2/LTBP1	4
MF	GO:0004252	serine-type endopeptidase activity	11/336	174/18432	0.00035983	0.00222799	0.00158772	PCSK2/CTSG/LTF/CTSS/CMA1/PCSK1/BMP1/PRTN3/MMP12/AZU1/TMPRSS6	11
MF	GO:0016500	protein-hormone receptor activity	4/336	20/18432	0.000417136	0.00254791	0.0018157	LGR6/AMHR2/TSHR/LGR5	4
MF	GO:0005496	steroid binding	8/336	101/18432	0.000520855	0.00313902	0.00223694	CETP/RORC/GPER1/PDIA2/APOD/RORA/PGR/S100G	8
MF	GO:0030414	peptidase inhibitor activity	11/336	187/18432	0.000660133	0.00392606	0.00279779	SLPI/A2M/AGT/LTF/C3/WFDC2/SERPIND1/WFIKKN1/BIRC5/LCN1/UMODL1	11
MF	GO:0033293	monocarboxylic acid binding	7/336	81/18432	0.000688383	0.0040409	0.00287963	FABP3/PPARD/FABP2/RBP5/ALB/FABP6/FABP4	7
MF	GO:0038024	cargo receptor activity	7/336	82/18432	0.000741076	0.00429444	0.00306031	ENDOU/OLR1/COLEC12/DMBT1/ACKR4/TFR2/MARCO	7
MF	GO:0004713	protein tyrosine kinase activity	9/336	138/18432	0.000977109	0.00559055	0.00398395	MET/BTK/SYK/TEK/ITK/NRP2/CSF1R/LCK/FLT3	9
MF	GO:0030247	polysaccharide binding	4/336	25/18432	0.00101364	0.00572705	0.00408122	HLA-DRA/ENDOU/FCN2/PTX3	4
MF	GO:0004875	complement receptor activity	3/336	12/18432	0.00116886	0.00650925	0.00463863	CR2/GPR32/FPR1	3
MF	GO:0070696	transmembrane receptor protein serine/threonine kinase binding	4/336	26/18432	0.00118088	0.00650925	0.00463863	BMP2/BMP7/BMP6/NODAL	4
MF	GO:0051219	phosphoprotein binding	7/336	92/18432	0.00146322	0.00787895	0.00561471	SYK/SH3BP2/GRAP2/LCK/VAV2/PLCG2/CBLC	7
MF	GO:0005024	transforming growth factor beta receptor activity	3/336	13/18432	0.00149909	0.00787895	0.00561471	BMPR1B/AMHR2/LTBP1	3
MF	GO:0035259	nuclear glucocorticoid receptor binding	3/336	13/18432	0.00149909	0.00787895	0.00561471	FLT3/NR4A2/NR4A3	3
MF	GO:0039706	co-receptor binding	3/336	13/18432	0.00149909	0.00787895	0.00561471	BMP2/TFR2/DKK1	3
MF	GO:0005044	scavenger receptor activity	5/336	47/18432	0.00159994	0.00831234	0.00592356	ENDOU/COLEC12/DMBT1/ACKR4/MARCO	5
MF	GO:0004866	endopeptidase inhibitor activity	10/336	180/18432	0.00176229	0.00905175	0.00645048	SLPI/A2M/AGT/LTF/C3/WFDC2/SERPIND1/WFIKKN1/BIRC5/LCN1	10
MF	GO:0016004	phospholipase activator activity	3/336	14/18432	0.00188231	0.00955959	0.00681237	BTK/LCK/CCL5	3
MF	GO:0005178	integrin binding	9/336	156/18432	0.00228804	0.011491	0.00818877	CD40LG/ITGAL/SYK/PRKCA/NRG1/IGF1/FGF1/IL1B/PTN	9
MF	GO:0070700	BMP receptor binding	3/336	15/18432	0.00232131	0.01153	0.00821655	BMP2/BMP7/BMP6	3
MF	GO:0003953	NAD+ nucleosidase activity	3/336	16/18432	0.00281869	0.013411	0.009557	TLR4/IL18R1/IL1RL2	3
MF	GO:0004698	calcium-dependent protein kinase C activity	3/336	16/18432	0.00281869	0.013411	0.009557	PRKCA/PRKCG/PRKCQ	3
MF	GO:0050135	NAD(P)+ nucleosidase activity	3/336	16/18432	0.00281869	0.013411	0.009557	TLR4/IL18R1/IL1RL2	3
MF	GO:0061809	NAD+ nucleotidase, cyclic ADP-ribose generating	3/336	16/18432	0.00281869	0.013411	0.009557	TLR4/IL18R1/IL1RL2	3
MF	GO:0061135	endopeptidase regulator activity	10/336	194/18432	0.003041	0.014318	0.0102034	SLPI/A2M/AGT/LTF/C3/WFDC2/SERPIND1/WFIKKN1/BIRC5/LCN1	10
MF	GO:0004697	protein kinase C activity	3/336	17/18432	0.00337685	0.0155749	0.011099	PRKCA/PRKCG/PRKCQ	3
MF	GO:0060229	lipase activator activity	3/336	17/18432	0.00337685	0.0155749	0.011099	BTK/LCK/CCL5	3
MF	GO:0061134	peptidase regulator activity	11/336	232/18432	0.00365555	0.01669	0.0118937	SLPI/A2M/AGT/LTF/C3/WFDC2/SERPIND1/WFIKKN1/BIRC5/LCN1/UMODL1	11
MF	GO:0043395	heparan sulfate proteoglycan binding	3/336	18/18432	0.00399799	0.017892	0.0127502	PTPRC/SLIT1/AZU1	3
MF	GO:0045236	CXCR chemokine receptor binding	3/336	18/18432	0.00399799	0.017892	0.0127502	CXCL3/CXCL5/CXCL1	3
MF	GO:0001540	amyloid-beta binding	6/336	85/18432	0.00459079	0.0203435	0.0144972	CD74/CALCR/TLR4/FCGR2B/TGFB2/MARCO	6
MF	GO:0051428	peptide hormone receptor binding	3/336	19/18432	0.00468414	0.0204317	0.01456	CCK/UCN2/LEP	3
MF	GO:0004714	transmembrane receptor protein tyrosine kinase activity	5/336	60/18432	0.00470109	0.0204317	0.01456	MET/TEK/NRP2/CSF1R/FLT3	5
MF	GO:0030246	carbohydrate binding	12/336	275/18432	0.00476668	0.0205194	0.0146226	HLA-DRA/ENDOU/REG3G/OLR1/COLEC12/COLEC10/KLRC3/FCN2/PTN/PTX3/SFTPD/MBL2	12
MF	GO:0001223	transcription coactivator binding	4/336	40/18432	0.0059115	0.0252075	0.0179634	PPARD/THRB/RORA/PGR	4
MF	GO:0005123	death receptor binding	3/336	21/18432	0.00625867	0.0264385	0.0188407	FASLG/NTF3/BDNF	3
MF	GO:0019887	protein kinase regulator activity	10/336	218/18432	0.00685796	0.0287018	0.0204536	TGFA/CD40LG/EGF/NRG1/LTF/BMP2/BMPR1B/CCL5/AREG/EPO	10
MF	GO:0042287	MHC protein binding	4/336	42/18432	0.00703743	0.0291827	0.0207963	HLA-E/CD74/CD244/CD4	4
MF	GO:0009931	calcium-dependent protein serine/threonine kinase activity	3/336	22/18432	0.00715026	0.0293811	0.0209376	PRKCA/PRKCG/PRKCQ	3
MF	GO:0010857	calcium-dependent protein kinase activity	3/336	23/18432	0.00811327	0.0327428	0.0233333	PRKCA/PRKCG/PRKCQ	3
MF	GO:0043274	phospholipase binding	3/336	23/18432	0.00811327	0.0327428	0.0233333	BTK/SYK/LCK	3
MF	GO:0004715	non-membrane spanning protein tyrosine kinase activity	4/336	45/18432	0.00897787	0.0359115	0.0255913	BTK/SYK/ITK/LCK	4
MF	GO:0004867	serine-type endopeptidase inhibitor activity	6/336	98/18432	0.0090867	0.036028	0.0256743	SLPI/A2M/AGT/WFDC2/SERPIND1/WFIKKN1	6
MF	GO:0004435	phosphatidylinositol phospholipase C activity	3/336	26/18432	0.0114423	0.0449731	0.0320488	CCR5/CCL5/PLCG2	3

## Sheet: Table S4
325 differential KEGG pathways between two immune-related subtypes
ID	Description	GeneRatio	BgRatio	pvalue	p.adjust	qvalue	geneID	Count
hsa04080	Neuroactive ligand-receptor interaction	117/1135	367/8577	2.08449e-21	6.77459e-19	5.00277e-19	2918/6753/6751/3351/8973/10800/57105/2911/2898/799/2147/399967/53829/10161/9934/5618/6870/8001/3357/5729/183/2561/2890/4852/1511/5023/2556/27334/5724/6869/2566/3356/2831/2359/885/7068/23566/7434/6344/3001/57152/2743/2357/718/1141/4160/3274/2892/4986/2569/1269/6755/1137/6343/6915/1903/283869/1241/117/2859/4158/51289/56413/5697/7425/2587/4987/79924/2906/2563/116444/4161/3360/2901/9170/2895/1143/502…	117
hsa04640	Hematopoietic cell lineage	42/1135	99/8577	5.29642e-13	8.60669e-11	6.35571e-11	3113/3115/3111/3117/3122/3108/3119/4254/911/924/948/3684/1438/1435/1380/913/7124/1436/920/1441/3553/910/3574/929/914/916/3568/2322/931/3552/917/909/7066/3589/1440/3674/2815/3565/2056/7850/921/3569	42
hsa04060	Cytokine-cytokine receptor interaction	83/1135	297/8577	6.41202e-12	6.94636e-10	5.12962e-10	1524/90865/1896/2829/768211/944/959/3560/6361/3603/729230/5618/6347/1234/10148/6354/1438/6363/3587/8995/1439/1435/10663/8794/7124/130399/1436/920/939/3561/4050/1233/650/1441/3553/1232/658/269/3574/2833/6356/51554/3593/6375/2921/356/6366/8784/6352/6374/3568/10803/3552/2662/7066/7292/655/1271/654/3589/7042/53342/55504/2658/10673/1440/6367/83729/8809/3565/2056/7850/4838/3596/3623/3569/146433/5617/13…	83
hsa04514	Cell adhesion molecules	52/1135	158/8577	1.08172e-10	8.78899e-09	6.49033e-09	3133/3106/3134/3107/3105/3113/3115/3111/3117/3122/5788/3108/3135/959/9672/3683/3119/6385/3684/6404/4359/29126/79679/6403/920/10666/9369/152404/5133/914/1002/139065/201633/5802/1462/26050/214/84628/57863/149461/5792/58494/1366/23705/84631/3696/9075/5789/94030/9379/4685/22854	52
hsa04020	Calcium signaling pathway	65/1135	253/8577	5.03197e-08	3.27078e-06	2.41534e-06	5260/9630/10345/3082/4846/815/10800/291/7942/91807/57105/7039/2066/2911/2065/4233/1950/6870/5578/100130933/3357/5137/3710/5023/5350/5724/5330/5136/6869/3356/2246/2769/255231/845/114/3274/6915/56413/8536/4776/2254/2906/116444/5336/107/3360/5026/4915/2253/6261/8877/85366/5582/8822/774/6865/6543/1812/26291/185/8911/8913/4923/163688/623	65
hsa05332	Graft-versus-host disease	20/1135	42/8577	6.57554e-08	3.56175e-06	2.63022e-06	3133/3106/3134/3107/3105/3113/3115/3111/3117/3122/3108/3135/3119/7124/3553/3802/3804/356/3552/3569	20
hsa04940	Type I diabetes mellitus	20/1135	43/8577	1.07765e-07	5.00336e-06	3.69479e-06	3133/3106/3134/3107/3105/3113/3115/3111/3117/3122/3108/3135/3119/7124/3553/2571/3593/356/3552/3329	20
hsa05330	Allograft rejection	18/1135	38/8577	3.3281e-07	1.35204e-05	9.98429e-06	3133/3106/3134/3107/3105/3113/3115/3111/3117/3122/3108/3135/959/3119/7124/3593/356/3565	18
hsa04061	Viral protein interaction with cytokine and cytokine receptor	32/1135	100/8577	8.70467e-07	3.14335e-05	2.32125e-05	1524/2829/3560/6361/729230/6347/1234/6354/6363/3587/1435/8794/7124/1436/3561/1233/1232/2833/6356/51554/6375/2921/6366/6352/6374/10803/6367/8809/3569/146433/6362/2919	32
hsa04151	PI3K-Akt signaling pathway	79/1135	359/8577	2.04258e-06	6.63839e-05	4.90219e-05	7143/3082/4846/118788/3918/5294/7039/2066/57121/2065/5521/4233/1950/3560/10161/4254/6850/5618/7010/5578/3718/5563/63923/284/8115/256076/7099/3479/84699/1435/596/1436/3561/2246/1441/23566/3574/5522/356/2322/4908/5649/1280/2784/1944/10319/1945/1943/1021/5105/5106/2254/9170/3908/4609/1440/5228/4915/2253/9048/8822/3381/1946/3910/3674/374/26291/3565/284217/2056/3696/627/94235/4602/1311/3569/2846/5617/…	79
hsa05321	Inflammatory bowel disease	23/1135	65/8577	4.49022e-06	0.000132665	9.79683e-05	3113/3115/3111/3117/3122/3108/3119/6097/7099/7100/7124/3561/3553/3593/30009/3552/2625/7042/6095/8809/3565/3596/3569	23
hsa04145	Phagosome	40/1135	152/8577	1.02834e-05	0.00027851	0.000205669	3133/3106/3134/526/3107/3105/3113/3115/3111/3117/3122/3108/3135/3119/948/4973/3684/64581/7099/81035/1520/1536/9103/929/2213/718/84617/525/10383/347733/7280/949/6441/10382/10381/4353/9902/1311/4153/8685	40
hsa05146	Amoebiasis	30/1135	102/8577	1.28422e-05	0.000319666	0.000236061	9630/3918/3315/911/5578/3684/1511/7099/913/7124/5330/2769/3553/910/929/3593/2921/909/10319/735/7042/87/107/3908/5582/3910/284217/7850/3569/2919	30
hsa05310	Asthma	14/1135	31/8577	1.37702e-05	0.000319666	0.000236061	3113/3115/3111/3117/3122/3108/959/3119/7124/2206/2205/6356/3565/3596	14
hsa05323	Rheumatoid arthritis	28/1135	93/8577	1.53179e-05	0.000331889	0.000245087	526/3113/3115/3111/3117/3122/3108/3683/3119/6347/7010/284/7099/1435/7124/4050/3553/2921/6352/6374/3552/3589/7042/525/10673/4312/3569/2919	28
hsa05033	Nicotine addiction	16/1135	40/8577	2.20743e-05	0.000448385	0.000331115	8973/2561/2890/2556/2566/1141/2892/2569/1137/57030/2906/2563/116444/246213/55879/774	16
hsa04612	Antigen processing and presentation	24/1135	78/8577	4.1382e-05	0.000791126	0.000584216	3133/3106/567/3134/3107/3105/3113/3115/972/3111/3117/3122/3108/3135/4261/3119/7124/1520/920/3802/3804/3306/3823/8302	24
hsa05150	Staphylococcus aureus infection	27/1135	96/8577	8.14104e-05	0.00146991	0.00108547	3113/3115/629/3111/3117/3122/3108/3866/3683/3119/2266/3684/6404/3875/6403/5724/2359/1672/9103/2357/3880/2213/718/3882/3861/1669/4153	27
hsa04925	Aldosterone synthesis and secretion	27/1135	98/8577	0.000119593	0.00204568	0.00151065	747/815/480/5578/111/183/3710/84699/5330/6770/114/23683/4158/8536/107/949/4929/5138/5582/3777/3284/185/8911/8913/163688/51305/3762	27
hsa04976	Bile secretion	25/1135	89/8577	0.000151011	0.00245392	0.00181213	79799/1576/480/111/7363/10864/1244/6344/54490/8431/8671/114/361/6523/54578/6343/200931/5244/6550/107/949/5243/8714/3781/570	25
hsa04650	Natural killer cell mediated cytotoxicity	33/1135	132/8577	0.000175335	0.00271351	0.00200383	3133/3106/3107/3105/117157/259197/3135/3683/6850/10451/5578/6452/962/4068/3937/919/7124/51744/4277/9437/3802/3804/356/3932/3823/7410/5336/399694/5582/5881/79465/80329/135250	33
hsa04658	Th1 and Th2 cell differentiation	25/1135	92/8577	0.000266828	0.00384331	0.00283814	3113/3115/3111/3117/3122/3108/3119/3560/3718/919/920/3561/3593/916/3932/30009/917/2625/6300/28514/5600/10683/3565/5588/3596	25
hsa05140	Leishmaniasis	22/1135	77/8577	0.000283798	0.00384331	0.00283814	3113/3115/3111/3117/3122/3108/3119/3684/7099/7124/1536/3553/9103/3593/718/3552/6300/7042/65108/1917/5600/3565	22
hsa00982	Drug metabolism - cytochrome P450	21/1135	72/8577	0.000283814	0.00384331	0.00283814	79799/130/126/127/222/1576/2329/125/27306/124/2328/1577/1548/7363/2938/54490/54578/2326/2941/2953/1565	21
hsa05320	Autoimmune thyroid disease	17/1135	53/8577	0.000308636	0.00390798	0.00288589	3133/3106/3134/3107/3105/3113/3115/3111/3117/3122/3108/3135/959/3119/356/7253/3565	17
hsa04015	Rap1 signaling pathway	46/1135	210/8577	0.000312638	0.00390798	0.00288589	3082/5900/84612/57121/4233/1950/3683/64411/4254/10451/7010/5578/111/3684/284/3479/3937/1435/1436/5330/2246/23566/54518/114/2357/23683/1944/7410/6300/1945/1943/2254/107/9170/5228/5600/2253/5582/8822/1946/3674/26291/5881/163688/2846/1268	46
hsa00980	Metabolism of xenobiotics by cytochrome P450	22/1135	78/8577	0.000346827	0.00417477	0.00308291	79799/130/126/127/222/1576/125/27306/124/1577/1548/7363/2938/54490/54578/22977/2941/2953/1565/27294/1572/1543	22
hsa05144	Malaria	16/1135	50/8577	0.000474578	0.0055085	0.00406781	3820/3082/959/4233/3683/6347/948/7099/7124/6403/3553/7042/3043/1440/1311/3569	16
hsa05416	Viral myocarditis	18/1135	60/8577	0.000521044	0.00583929	0.00431209	3133/3106/3134/3107/3105/3113/3115/3111/3117/3122/3108/3135/959/3683/3119/3908/5881/284217	18
hsa04659	Th17 cell differentiation	27/1135	108/8577	0.00066054	0.00715585	0.00528432	3113/3115/3111/3117/3122/3108/3119/3560/10148/3718/6097/919/920/3561/3553/3662/916/3932/30009/917/2625/6300/6095/5600/3565/5588/3569	27
hsa04360	Axon guidance	40/1135	182/8577	0.000701258	0.0073519	0.00542909	7222/815/84612/4233/5578/137970/57556/9723/81029/658/7224/1949/25791/1944/655/1945/1947/1943/2043/10501/9353/6585/4776/54361/84628/5336/6469/7474/2049/80031/4917/3983/1946/5881/6608/90249/7869/1630/84448/22854	40
hsa05145	Toxoplasmosis	27/1135	111/8577	0.00103671	0.01023	0.00755447	3113/3115/3111/3918/3117/23643/3122/5294/3108/79444/959/4261/3119/330/1234/3587/7099/596/7124/3593/10319/6300/7042/3908/5600/3910/284217	27
hsa04010	MAPK signaling pathway	59/1135	301/8577	0.00103874	0.01023	0.00755447	7867/5801/3082/7039/2066/2065/4233/1950/3315/4254/7010/5578/284/3479/1435/7124/1436/2246/3553/929/356/1852/2322/4908/3552/27092/1944/782/6300/1945/783/59284/7042/1943/9254/3925/2254/84867/4137/4609/5228/5600/4915/2253/9048/5582/8822/774/1946/374/2318/26291/5881/23542/627/5778/8911/8913/283748	59
hsa04611	Platelet activation	29/1135	124/8577	0.00133911	0.012125	0.00895384	4846/2977/64805/5294/91807/2147/695/2266/6850/5742/111/3710/5023/3937/5330/5592/54518/114/2244/2243/6915/6300/5336/107/5600/85366/3674/2815/283748	29
hsa03320	PPAR signaling pathway	20/1135	75/8577	0.0013704	0.012125	0.00895384	2170/5467/2169/1593/336/948/4973/51703/11001/2172/335/126129/5105/5346/5106/51129/4312/2167/5360/9370	20
hsa05032	Morphine addiction	23/1135	91/8577	0.00137528	0.012125	0.00895384	5578/111/5137/2561/2556/5136/2566/114/2569/50940/3760/2784/2563/107/5138/5582/55879/774/1812/3763/94235/3762/5140	23
hsa04725	Cholinergic synapse	27/1135	113/8577	0.00138038	0.012125	0.00895384	815/8973/5294/5578/111/3710/84699/596/5330/3761/114/1141/3760/6572/1137/2784/3770/43/3785/107/1143/5582/774/9132/1136/3763/94235	27
hsa04310	Wnt signaling pathway	37/1135	171/8577	0.00147491	0.0126144	0.00931522	5467/815/5578/5330/59352/80319/81029/50964/27123/7484/7088/85407/8061/51176/7480/4776/11211/54361/7475/22943/4609/6425/7474/147495/57216/25805/5582/1501/10297/8313/5881/8549/11197/7472/6424/284654/4316	37
hsa04728	Dopaminergic synapse	30/1135	132/8577	0.00180534	0.0150445	0.0111098	815/5521/5578/111/3710/2890/6571/84699/5330/5522/2892/6570/6531/3760/2784/6300/3800/6323/5600/84152/5582/774/1812/7054/1815/3763/94235/163688/3762/50632	30
hsa04979	Cholesterol metabolism	15/1135	51/8577	0.0018576	0.015093	0.0111456	3990/6272/1071/1593/336/948/6770/337/335/6646/3988/949/51129/9388/5360	15
hsa00601	Glycosphingolipid biosynthesis - lacto and neolacto series	10/1135	28/8577	0.00216865	0.016878	0.0124638	10331/8707/2529/8704/2523/6484/2524/79369/8708/6489	10
hsa04657	IL-17 signaling pathway	23/1135	94/8577	0.00218116	0.016878	0.0124638	6361/6347/6354/3934/7124/3553/6356/2921/6374/8061/6300/225689/7128/53342/1440/727897/5600/4322/3565/4312/3596/3569/2919	23
hsa05217	Basal cell carcinoma	17/1135	63/8577	0.0026656	0.0194452	0.0143596	650/81029/7484/374654/51176/2735/7480/2737/11211/54361/7475/6469/7474/10297/8313/6608/7472	17
hsa00430	Taurine and hypotaurine metabolism	7/1135	16/8577	0.0026855	0.0194452	0.0143596	2329/339896/2328/2571/124975/2326/570	7
hsa05340	Primary immunodeficiency	12/1135	38/8577	0.00269242	0.0194452	0.0143596	973/5788/959/695/4261/3718/920/3561/916/3932/326/3543	12
hsa04975	Fat digestion and absorption	13/1135	43/8577	0.00280389	0.0198101	0.014629	1056/2169/948/4547/29881/26279/8513/337/5406/335/5408/949/39	13
hsa04713	Circadian entrainment	23/1135	97/8577	0.00335686	0.0232123	0.0171414	815/2977/5578/111/3710/2890/5330/5592/114/2892/3760/2784/117/2906/107/6261/5582/3763/94235/8911/8913/163688/3762	23
hsa04974	Protein digestion and absorption	24/1135	103/8577	0.00352914	0.0238952	0.0176457	1359/117247/7373/81578/480/256076/4224/1280/1301/1289/80781/1294/57642/440387/6550/6505/91522/1295/6543/50509/6510/136227/1305/2006	24
hsa04062	Chemokine signaling pathway	39/1135	192/8577	0.00369836	0.02453	0.0181144	1524/5294/2829/6361/729230/6347/10451/1234/3718/111/3702/6354/1794/6363/10663/5330/1233/1232/2833/6356/6375/2921/6366/114/6352/6374/10803/2784/7410/6011/5336/107/399694/6367/131890/5881/94235/6362/2919	39
hsa00770	Pantothenate and CoA biosynthesis	8/1135	21/8577	0.00378575	0.0246073	0.0181716	8875/1807/339896/8876/51733/5167/586/5169	8
hsa04540	Gap junction	21/1135	88/8577	0.00456501	0.0290907	0.0214824	2977/2911/1950/5578/111/3357/3710/5330/3356/5592/114/84617/10383/347733/7280/107/5582/10382/983/1812/10381	21
hsa04512	ECM-receptor interaction	21/1135	89/8577	0.00524965	0.0328103	0.0242292	7143/3918/6385/948/63923/256076/5649/1280/22987/341640/10319/3908/3381/3910/3674/2815/284217/3696/1311/3371/9900	21
hsa04664	Fc epsilon RI signaling pathway	17/1135	68/8577	0.00623177	0.0382137	0.0282193	3635/695/6850/10451/5578/3937/7124/2206/2205/7410/6300/5336/5600/5881/3565/3596/283748	17
hsa05143	African trypanosomiasis	11/1135	37/8577	0.00667186	0.0401547	0.0296527	5578/7124/5330/3553/3593/356/335/3043/5582/3910/3569	11
hsa04614	Renin-angiotensin system	8/1135	23/8577	0.00715931	0.042305	0.0312406	5476/1359/3816/183/1511/1215/185/5972	8
hsa04610	Complement and coagulation cascades	20/1135	86/8577	0.00752694	0.042629	0.0314798	2157/629/729/2/2147/2266/3684/1380/730/5265/718/2244/2243/2160/2161/735/3053/5270/623/4153	20
hsa04724	Glutamatergic synapse	25/1135	115/8577	0.00760763	0.042629	0.0314798	2918/2744/2911/2898/5578/111/3710/2890/5330/114/2892/3760/9229/22941/2784/57030/2906/116444/107/2901/6505/5582/246213/94235/283748	25
hsa04726	Serotonergic synapse	25/1135	115/8577	0.00760763	0.042629	0.0314798	3351/5742/5578/111/3357/3710/2561/6571/5330/3359/3356/6570/3760/2784/3360/5582/774/1565/3781/3763/94235/242/3762/247/283748	25
hsa04929	GnRH secretion	16/1135	64/8577	0.00783433	0.0431552	0.0318685	348980/5578/3710/5330/3767/2852/3760/7224/3814/5582/3781/3763/8911/8913/84634/3762	16
hsa04672	Intestinal immune network for IgA production	13/1135	49/8577	0.00945286	0.051203	0.0378114	3113/3115/3111/3117/3122/3108/959/3119/5284/10803/10673/3565/3569	13
hsa04727	GABAergic synapse	20/1135	89/8577	0.01109	0.0590859	0.0436327	18/2744/5334/5578/111/2561/2556/2566/2571/114/2569/2784/92745/2563/107/5582/55879/774/3763/94235	20
hsa00100	Steroid biosynthesis	7/1135	20/8577	0.0112894	0.0591784	0.043701	1056/1594/6646/4047/3988/1717/6713	7
hsa04916	Melanogenesis	22/1135	101/8577	0.0115449	0.0595568	0.0439804	815/4286/4254/5578/111/84699/5330/434/81029/114/7484/51176/7480/11211/54361/107/7475/7474/5582/7472/163688/7306	22
hsa05134	Legionellosis	14/1135	56/8577	0.0124318	0.0631301	0.0466192	834/3684/7099/7100/7124/3553/929/3593/2921/718/3329/1917/3569/2919	14
hsa05414	Dilated cardiomyopathy	21/1135	96/8577	0.0127755	0.0638776	0.0471712	111/183/3479/5350/7124/114/70/27092/782/783/59284/7042/7137/9254/107/3908/3674/6543/284217/3696/7169	21
hsa00140	Steroid hormone biosynthesis	15/1135	62/8577	0.0133952	0.0653905	0.0482883	79799/6718/1576/9420/1577/6716/7363/54490/54578/3293/3291/3294/6783/3284/1543	15
hsa04390	Hippo signaling pathway	31/1135	157/8577	0.0134805	0.0653905	0.0482883	1740/84612/5521/330/29119/650/2246/81029/658/5522/166824/7484/85407/655/654/51176/7042/7480/11211/54361/7475/79981/4609/122786/7474/10297/374/8313/7161/332/7472	31
hsa00983	Drug metabolism - other enzymes	18/1135	80/8577	0.0152798	0.0723945	0.0534605	79799/1807/1576/9/1548/51733/151531/7363/2938/54490/54578/3614/2941/2953/10/6241/7083/4353	18
hsa05166	Human T-cell leukemia virus 1 infection	41/1135	222/8577	0.01563	0.0723945	0.0534605	3133/3106/567/3134/3107/3105/3113/3115/3111/3117/291/3122/3108/3135/3683/3119/3560/3718/111/84699/7124/920/3561/1959/916/3932/114/917/9184/8061/6929/7042/2224/991/4776/107/4609/9133/7850/3569/4316	41
hsa00350	Tyrosine metabolism	10/1135	36/8577	0.0156527	0.0723945	0.0534605	130/126/127/222/125/124/314/3242/7054/7306	10
hsa04750	Inflammatory mediator regulation of TRP channels	21/1135	98/8577	0.0160456	0.0723945	0.0534605	815/8989/5578/111/3357/3710/3479/5330/3356/3553/114/41/6300/5336/107/5600/5582/5588/163688/623/283748	21
hsa04064	NF-kappa B signaling pathway	22/1135	104/8577	0.0161243	0.0723945	0.0534605	23643/1896/959/695/330/6850/6363/7099/596/7124/4050/3553/929/2921/3932/6366/7128/5336/10673/79092/5588/2919	22
hsa05031	Amphetamine addiction	16/1135	69/8577	0.0162609	0.0723945	0.0534605	815/5578/111/2890/6571/84699/2892/6570/6531/2906/116444/84152/5582/1812/7054/163688	16
hsa04970	Salivary secretion	20/1135	93/8577	0.0178054	0.0772793	0.0570678	2977/480/5578/111/3710/4069/5330/5592/1755/1469/3347/114/1470/1473/107/727897/5582/54831/163688/362	20
hsa04921	Oxytocin signaling pathway	30/1135	154/8577	0.0178337	0.0772793	0.0570678	4846/815/2977/5294/91807/5578/111/5563/3710/5997/5330/3761/114/27092/3760/3770/782/783/59284/9254/8536/4776/107/6261/85366/5582/3763/163688/3762/283748	30
hsa04723	Retrograde endocannabinoid signaling	29/1135	148/8577	0.0181927	0.0775628	0.0572771	747/4694/2911/5578/111/3710/2561/2890/2556/5330/2566/114/2892/2569/3760/2784/6300/57030/2563/107/5600/5582/246213/55879/774/3763/94235/3762/1268	29
hsa05205	Proteoglycans in cancer	38/1135	205/8577	0.0183764	0.0775628	0.0572771	3082/815/2066/2065/4233/286/10451/6385/5578/3710/7099/3479/7124/81029/7291/3593/356/7484/7410/6300/7042/7480/1634/117581/11211/54361/5336/7475/6469/4609/5600/7474/5582/2318/6608/3236/7472/3549	38
hsa05152	Tuberculosis	34/1135	180/8577	0.0190791	0.0794963	0.0587049	3113/3115/972/815/3111/3117/3122/3108/4261/3119/6850/3684/64581/3587/7099/596/7124/1520/3553/9103/929/3593/2213/718/3552/1594/6300/7042/3329/5600/8877/9902/163688/3569	34
hsa04934	Cushing syndrome	30/1135	155/8577	0.0194112	0.0798562	0.0589707	815/111/183/3710/84699/5330/6770/81029/23746/114/7484/50940/51176/1021/4158/7480/11211/54361/107/7475/949/7474/10297/3777/8313/3284/185/7472/8911/8913	30
hsa05226	Gastric cancer	29/1135	149/8577	0.0198322	0.0803932	0.0593673	3082/5915/4233/1950/596/29119/1015/2246/81029/7484/51176/7042/7480/2254/11211/54361/7475/6469/4609/399694/2253/7474/8822/10297/8313/5243/26291/7472/1045	29
hsa00650	Butanoate metabolism	8/1135	27/8577	0.0200365	0.0803932	0.0593673	54511/18/116285/348158/2571/65985/39/64064	8
hsa04927	Cortisol synthesis and secretion	15/1135	65/8577	0.0204479	0.0810434	0.0598474	111/183/3710/84699/5330/6770/114/4158/107/949/3777/3284/185/8911/8913	15
hsa04730	Long-term depression	14/1135	60/8577	0.0224825	0.0880337	0.0650095	2977/2911/5578/3710/2890/3479/5330/5592/2892/2895/6261/5582/2781/283748	14
hsa05142	Chagas disease	21/1135	102/8577	0.0245305	0.0943512	0.0696747	9630/5521/6347/7099/919/7124/5330/2769/3553/5522/3593/916/356/6352/718/917/6300/7042/107/5600/3569	21
hsa05410	Hypertrophic cardiomyopathy	19/1135	90/8577	0.0246765	0.0943512	0.0696747	5563/183/3479/7124/70/27092/782/783/59284/7042/7137/9254/3908/3674/6543/284217/3696/7169/3569	19
hsa00830	Retinol metabolism	15/1135	68/8577	0.0300051	0.113391	0.0837351	79799/130/126/127/1576/125/216/124/1577/1548/7363/54490/54578/1543/6121	15
hsa00534	Glycosaminoglycan biosynthesis - heparan sulfate / heparin	7/1135	24/8577	0.0314381	0.117441	0.0867259	266722/2134/64579/222537/2135/9957/90161	7
hsa05204	Chemical carcinogenesis - DNA adducts	15/1135	69/8577	0.0338229	0.124614	0.0920228	79799/1576/27306/9/1577/1548/7363/6799/2938/54490/54578/2941/2953/10/1543	15
hsa04550	Signaling pathways regulating pluripotency of stem cells	27/1135	143/8577	0.0341251	0.124614	0.0920228	3718/3479/130399/81029/658/1852/7484/6929/3670/6300/10637/7480/5013/11211/54361/7475/4609/5600/83729/7474/9314/10297/8313/64211/9421/4838/7472	27
hsa05417	Lipid and atherosclerosis	38/1135	215/8577	0.0362677	0.130967	0.096714	6648/4846/834/815/23643/114548/959/6347/10451/5578/948/4973/7099/596/1548/7124/6403/5330/1536/3553/929/3593/2921/356/3306/6352/337/335/7410/6300/2081/3329/5600/4312/163688/1543/3569/2919	38
hsa01523	Antifolate resistance	8/1135	30/8577	0.0369402	0.131929	0.0974248	7124/3553/1244/6573/7298/8714/2348/3569	8
hsa05133	Pertussis	16/1135	76/8577	0.0380644	0.134466	0.0992983	834/23643/114548/3684/7099/7124/3553/929/3593/6374/718/3552/6300/5600/163688/3569	16
hsa05412	Arrhythmogenic right ventricular cardiomyopathy	16/1135	77/8577	0.0423794	0.1481	0.109366	1824/29119/1829/1832/27092/782/51176/783/59284/9254/3908/3674/6543/284217/3696/88	16
hsa04024	cAMP signaling pathway	39/1135	225/8577	0.0446339	0.154319	0.113959	56670/6751/3351/815/1259/480/64411/10451/111/2890/4852/5350/84699/6662/7434/5348/114/2892/6755/7410/2735/7137/117/4158/1261/2906/2737/116444/107/3360/84152/7253/2696/1812/5881/627/163688/5140/10021	39
hsa04721	Synaptic vesicle cycle	16/1135	78/8577	0.0470329	0.160101	0.118228	526/440279/6809/6571/10815/6570/6531/6572/525/57030/1759/6536/6505/246213/774/23025	16
hsa04950	Maturity onset diabetes of the young	7/1135	26/8577	0.0472914	0.160101	0.118228	6927/3170/3171/222546/3174/2645/4821	7
hsa04072	Phospholipase D signaling pathway	27/1135	148/8577	0.0497658	0.166741	0.123132	2918/5294/5900/57121/2911/2147/1950/10161/4254/6850/5578/111/183/5330/2206/23566/2205/114/1759/5336/107/9170/399694/8877/185/2846/283748	27
hsa05030	Cocaine addiction	11/1135	49/8577	0.0519214	0.172188	0.127154	111/6571/84699/6570/6531/2906/116444/84152/1812/7054/627	11
hsa04918	Thyroid hormone synthesis	15/1135	75/8577	0.0643522	0.211257	0.156005	50506/2878/480/5578/111/3710/84699/5330/213/114/433/432/107/5582/7253	15
hsa04920	Adipocytokine signaling pathway	14/1135	69/8577	0.0653892	0.212515	0.156934	10891/5563/948/51703/4852/7124/126129/5105/5106/181/6517/5588/3952/9370	14
hsa04913	Ovarian steroidogenesis	11/1135	51/8577	0.0665671	0.214201	0.158179	111/3479/6770/114/654/107/949/3294/3284/1543/283748	11
hsa04971	Gastric acid secretion	15/1135	76/8577	0.0708164	0.22564	0.166627	815/91807/480/5578/111/3773/3710/5330/114/3274/107/85366/5582/495/163688	15
hsa04964	Proximal tubule bicarbonate reclamation	6/1135	23/8577	0.0734853	0.231871	0.171228	2744/480/8671/5105/5106/6550	6
hsa04261	Adrenergic signaling in cardiomyocytes	27/1135	154/8577	0.0747308	0.233534	0.172456	815/5294/5521/480/5578/111/183/5350/84699/596/5330/5522/114/70/27092/782/6300/783/59284/7137/9254/107/5600/6543/7169/185/163688	27
hsa00230	Purine metabolism	23/1135	128/8577	0.0760034	0.235249	0.173722	2977/111/5137/22875/5148/5136/272/5167/284958/114/50940/5152/107/9060/3614/5138/4907/6241/55821/122481/5169/5140/3000	23
hsa04936	Alcoholic liver disease	25/1135	142/8577	0.0806979	0.247423	0.182712	130/126/127/10891/125/23643/124/5563/7099/7124/3553/929/3593/2921/356/718/126129/6300/51176/2194/5600/50507/3569/9370/2919	25
hsa00620	Pyruvate metabolism	10/1135	47/8577	0.0841277	0.255528	0.188698	5160/130/126/127/125/124/97/5105/5106/39	10
hsa04977	Vitamin digestion and absorption	6/1135	24/8577	0.087501	0.263313	0.194447	337/5406/335/6573/949/80704	6
hsa04978	Mineral absorption	12/1135	60/8577	0.0914597	0.272701	0.201379	4891/480/30061/6523/1181/1317/65010/6550/4499/6543/4496/795	12
hsa04742	Taste transduction	16/1135	86/8577	0.0975356	0.285577	0.210888	3351/2911/6328/5137/3710/2556/5330/5136/3359/114/255022/2784/6338/29850/10021/6335	16
hsa04911	Insulin secretion	16/1135	86/8577	0.0975356	0.285577	0.210888	815/480/5578/111/3710/84699/5330/3767/885/114/117/107/5582/3781/2645/2864	16
hsa00533	Glycosaminoglycan biosynthesis - keratan sulfate	4/1135	14/8577	0.10293	0.298681	0.220564	4166/10164/8704/8534	4
hsa00410	beta-Alanine metabolism	7/1135	31/8577	0.106082	0.305095	0.225301	222/18/1807/339896/51733/2571/314	7
hsa00250	Alanine, aspartate and glutamate metabolism	8/1135	37/8577	0.107018	0.305095	0.225301	18/2875/2744/8659/2571/339983/189/445	8
hsa04972	Pancreatic secretion	18/1135	102/8577	0.121692	0.343912	0.253966	1056/1359/480/5578/111/3710/5330/885/6344/8671/114/26279/5406/6343/5408/440387/107/5582	18
hsa02010	ABC transporters	9/1135	45/8577	0.132376	0.370881	0.273882	21/340273/26154/1244/1672/5244/10058/5243/8714	9
hsa05164	Influenza A	28/1135	171/8577	0.134373	0.373257	0.275636	7177/64499/23430/3113/3115/90865/834/3111/3117/291/3122/3108/114548/4261/3119/6347/5578/7099/51284/7124/3553/3593/356/6352/3552/2224/1021/3569	28
hsa04923	Regulation of lipolysis in adipocytes	11/1135	58/8577	0.137118	0.377654	0.278883	5742/111/4852/5592/114/63924/5346/107/7253/2167/5140	11
hsa04625	C-type lectin receptor signaling pathway	18/1135	104/8577	0.139099	0.379891	0.280535	834/114548/6361/6850/64581/3710/7124/3553/3593/1959/6300/4776/53342/5336/5600/6367/163688/3569	18
hsa04370	VEGF signaling pathway	11/1135	59/8577	0.149607	0.404175	0.298468	7867/4846/3315/5578/6300/5336/5600/8877/5582/5881/283748	11
hsa00260	Glycine, serine and threonine metabolism	8/1135	40/8577	0.150648	0.404175	0.298468	27232/2628/55349/875/314/26227/189/2731	8
hsa00603	Glycosphingolipid biosynthesis - globo and isoglobo series	4/1135	16/8577	0.151743	0.404175	0.298468	26301/2523/2524/6489	4
hsa04022	cGMP-PKG signaling pathway	27/1135	167/8577	0.154986	0.404175	0.298468	4846/1259/2977/291/5294/91807/480/111/3710/5997/5350/84699/5330/5592/114/4776/4880/107/5138/85366/6543/152/150/185/163688/2626/5140	27
hsa00600	Sphingolipid metabolism	10/1135	53/8577	0.155377	0.404175	0.298468	427/130367/55304/7368/7357/129807/2583/8877/339221/125981	10
hsa00220	Arginine biosynthesis	5/1135	22/8577	0.156518	0.404175	0.298468	2875/2744/4846/162417/445	5
hsa04928	Parathyroid hormone synthesis, secretion and action	18/1135	106/8577	0.157846	0.404175	0.298468	5578/111/3710/84699/596/5330/9368/50964/114/2625/4326/4323/1594/4324/107/4929/5582/4322	18
hsa05169	Epstein-Barr virus infection	32/1135	202/8577	0.157939	0.404175	0.298468	3133/3106/567/3134/3107/3105/3113/3115/3111/3117/3122/3108/3135/695/3683/3119/6850/3718/919/596/1380/7124/916/917/6300/1021/7128/7431/5336/4609/5600/3569	32
hsa05224	Breast cancer	24/1135	147/8577	0.159795	0.405731	0.299617	1950/3479/2246/81029/7484/51176/1021/7480/2254/11211/54361/7475/28514/4609/399694/2253/7474/8822/10297/8313/10683/26291/5241/7472	24
hsa04510	Focal adhesion	32/1135	203/8577	0.164993	0.412867	0.304886	7143/3082/3918/91807/4233/1950/330/10451/5578/63923/256076/3479/596/5649/1280/10319/7410/87/3908/5228/399694/85366/5582/3381/3910/3674/2318/5881/284217/3696/1311/3371	32
hsa04933	AGE-RAGE signaling pathway in diabetic complications	17/1135	100/8577	0.165147	0.412867	0.304886	4846/6347/5578/183/596/7124/5330/1536/3553/3552/6300/7042/5336/5600/50507/185/3569	17
hsa00010	Glycolysis / Gluconeogenesis	12/1135	67/8577	0.168638	0.417794	0.308525	5160/130/126/127/222/125/124/229/3099/5105/5106/2645	12
hsa04260	Cardiac muscle contraction	15/1135	87/8577	0.169689	0.417794	0.308525	1349/10345/1339/480/845/70/27092/782/783/59284/7137/9254/125965/6543/7169	15
hsa04660	T cell receptor signaling pathway	20/1135	121/8577	0.171766	0.41973	0.309955	5788/5521/959/10451/3702/3937/919/7124/9402/920/5522/5133/916/3932/917/7410/6300/5600/3565/5588	20
hsa04115	p53 signaling pathway	13/1135	74/8577	0.173582	0.421001	0.310893	5366/3479/596/1021/84883/51512/56475/983/2810/9133/7161/6241/63970	13
hsa04744	Phototransduction	6/1135	29/8577	0.17671	0.422768	0.312198	1259/5148/6011/131890/163688/3000	6
hsa04350	TGF-beta signaling pathway	18/1135	108/8577	0.177889	0.422768	0.312198	7124/130399/650/658/269/64388/655/654/7042/10637/4052/8646/7036/1634/4609/83729/25805/4838	18
hsa00120	Primary bile acid biosynthesis	4/1135	17/8577	0.178874	0.422768	0.312198	6718/1593/9420/570	4
hsa04613	Neutrophil extracellular trap formation	30/1135	191/8577	0.179514	0.422768	0.312198	834/291/1183/3683/2266/6850/5578/3684/9734/27180/64581/6404/1511/7099/51284/6403/5330/1536/2359/2357/718/2244/2243/6300/5336/5600/5582/3674/566/4353	30
hsa00512	Mucin type O-glycan biosynthesis	7/1135	36/8577	0.190987	0.446552	0.329761	51809/10331/442117/9245/79623/50614/57452	7
hsa04915	Estrogen signaling pathway	22/1135	137/8577	0.19342	0.447186	0.33023	4846/7039/3866/2911/111/3710/3875/84699/596/5330/2852/114/3880/3760/107/399694/5241/3763/163688/3762/3882/3861	22
hsa04924	Renin secretion	12/1135	69/8577	0.195281	0.447186	0.33023	2977/111/5137/183/3710/5330/5136/117/185/163688/5972/5140	12
hsa04814	Motor proteins	30/1135	193/8577	0.195386	0.447186	0.33023	53904/4648/27019/7802/140469/70/79784/57644/7138/374654/26153/84617/10383/7137/347733/3800/3832/7280/11004/9928/8735/7136/81930/55083/10382/113220/10381/3833/7169/547	30
hsa04340	Hedgehog signaling pathway	10/1135	56/8577	0.199564	0.451554	0.333455	57467/596/374654/2735/2121/2737/132884/6469/6608/3549	10
hsa04014	Ras signaling pathway	36/1135	236/8577	0.20073	0.451554	0.333455	3082/5900/7039/4233/1950/4254/7010/5578/284/3479/1435/1436/2246/356/26279/2322/4908/2784/1944/1945/1943/2254/5336/5228/399694/4915/2253/5582/8822/1946/26291/5881/627/94235/163688/283748	36
hsa00071	Fatty acid degradation	8/1135	43/8577	0.201462	0.451554	0.333455	130/126/127/125/124/51703/126129/39	8
hsa04630	JAK-STAT signaling pathway	26/1135	166/8577	0.204224	0.454608	0.335711	1154/1950/3560/5618/3718/1438/3587/1439/596/3561/1441/3574/3593/3568/7066/1271/3589/4609/1440/3565/2056/3596/3569/5617/133396/3952	26
hsa00760	Nicotinate and nicotinamide metabolism	7/1135	37/8577	0.210579	0.462421	0.34148	27231/5167/284958/23057/93100/4907/5169	7
hsa04960	Aldosterone-regulated sodium reabsorption	7/1135	37/8577	0.210579	0.462421	0.34148	480/5578/3479/6338/5582/2810/3291	7
hsa04662	B cell receptor signaling pathway	14/1135	84/8577	0.215417	0.469869	0.346981	973/118788/27071/3635/695/6850/10451/1380/640/10990/2213/7410/5336/5881	14
hsa05225	Hepatocellular carcinoma	26/1135	168/8577	0.222573	0.482242	0.356117	3082/7039/4233/5578/81029/2938/7484/51176/7042/1021/8193/7480/11211/54361/5336/7475/4609/399694/7474/2941/5582/1728/10297/2953/8313/7472	26
hsa00240	Pyrimidine metabolism	10/1135	58/8577	0.231689	0.498669	0.368248	1807/51733/151531/5167/284958/7298/4907/6241/7083/5169	10
hsa05207	Chemical carcinogenesis - receptor activation	32/1135	212/8577	0.236001	0.502362	0.370975	79799/1576/1950/5578/111/84699/596/7363/2938/23746/54490/114/1141/54578/1137/2254/107/28514/1143/4609/2253/2941/9314/5582/8822/774/2953/10683/5241/1136/332/1543	32
hsa01210	2-Oxocarboxylic acid metabolism	4/1135	19/8577	0.237244	0.502362	0.370975	2875/586/162417/3417	4
hsa05223	Non-small cell lung cancer	12/1135	72/8577	0.238495	0.502362	0.370975	3082/5915/7039/4233/1950/5578/3718/1021/3800/5336/5582/238	12
hsa01521	EGFR tyrosine kinase inhibitor resistance	13/1135	79/8577	0.240704	0.502362	0.370975	3082/7039/2065/4233/1950/5578/3084/3479/596/5336/399694/5582/3569	13
hsa05210	Colorectal cancer	14/1135	86/8577	0.24234	0.502362	0.370975	5900/7039/1950/5366/596/51176/7042/4609/10297/374/8313/5881/332/1630	14
hsa04215	Apoptosis - multiple species	6/1135	32/8577	0.24268	0.502362	0.370975	79444/5366/330/596/666/332	6
hsa04071	Sphingolipid signaling pathway	19/1135	121/8577	0.24512	0.504202	0.372334	427/130367/4846/5521/5578/55304/596/7124/5330/2206/2205/5522/1903/6300/5600/8877/5582/125981/5881	19
hsa04670	Leukocyte transendothelial migration	18/1135	115/8577	0.25719	0.517768	0.382352	3683/10451/5578/3702/3684/29119/399/1536/7410/6300/87/5336/149461/5600/58494/5582/1366/9075	18
hsa04931	Insulin resistance	17/1135	108/8577	0.257335	0.517768	0.382352	79660/10891/4846/5563/948/183/84699/7124/11001/5105/11000/5106/5792/6517/51085/5588/3569	17
hsa05202	Transcriptional misregulation in cancer	29/1135	193/8577	0.257541	0.517768	0.382352	4286/26471/2313/4233/3560/330/3684/3479/1436/929/2322/2892/2118/6929/4291/8091/3207/7490/3195/2119/8013/4609/7850/4353/5081/3569/30012/4613/1669	29
hsa04930	Type II diabetes mellitus	8/1135	46/8577	0.258088	0.517768	0.382352	7124/3767/3099/6517/774/2645/8913/9370	8
hsa04720	Long-term potentiation	11/1135	67/8577	0.267737	0.533831	0.394214	815/2911/5578/3710/2890/5330/114/2906/107/5582/163688	11
hsa04066	HIF-1 signaling pathway	17/1135	109/8577	0.270078	0.535215	0.395236	5160/4846/815/1950/7010/5578/284/7099/229/3479/596/1536/3099/5336/5582/2056/3569	17
hsa04966	Collecting duct acid secretion	5/1135	27/8577	0.281868	0.555195	0.40999	526/1188/6521/525/495	5
hsa05163	Human cytomegalovirus infection	33/1135	225/8577	0.287874	0.563609	0.416203	3133/3106/567/3134/3107/3105/3135/6347/1234/5578/111/3587/3710/84699/7124/5330/3553/1232/356/114/6352/2784/6300/1021/4776/107/4609/5600/5582/5881/94235/163688/3569	33
hsa05418	Fluid shear stress and atherosclerosis	21/1135	139/8577	0.290205	0.56477	0.417061	4846/6347/6385/5563/596/7124/3553/658/2938/3552/6300/4880/5600/2941/1728/3674/2953/5881/7850/163688/445	21
hsa05170	Human immunodeficiency virus 1 infection	31/1135	212/8577	0.301628	0.583507	0.430897	3133/3106/567/3134/3107/3105/3135/140564/1234/5578/3710/7099/919/596/7124/920/916/356/917/2784/6300/4776/5336/5600/5582/983/10053/9133/5881/94235/163688	31
hsa04270	Vascular smooth muscle contraction	20/1135	134/8577	0.316251	0.605084	0.446831	2977/91807/5578/111/183/3710/5330/5592/114/26279/79784/79924/4880/107/85366/5582/5588/185/163688/283748	20
hsa05120	Epithelial cell signaling in Helicobacter pylori infection	11/1135	70/8577	0.318367	0.605084	0.446831	526/4233/2921/6352/6300/525/150084/5336/5600/58494/2919	11
hsa05230	Central carbon metabolism in cancer	11/1135	70/8577	0.318367	0.605084	0.446831	5160/2744/2539/4233/3099/2322/3417/4609/8140/6510/2645	11
hsa04935	Growth hormone synthesis, secretion and action	18/1135	120/8577	0.320809	0.606179	0.44764	6753/6751/5578/111/3710/3479/84699/5330/3483/114/6755/6300/5336/107/399694/5600/5582/2692	18
hsa00340	Histidine metabolism	4/1135	22/8577	0.330982	0.616282	0.455101	3067/222/3176/144193	4
hsa04380	Osteoclast differentiation	19/1135	128/8577	0.33135	0.616282	0.455101	4286/799/695/6850/3937/1435/7124/1436/3553/9103/3932/10990/2213/3552/8061/6300/7042/5336/5600	19
hsa04012	ErbB signaling pathway	13/1135	85/8577	0.331844	0.616282	0.455101	815/7039/2066/2065/1950/5578/3084/145957/5336/4609/399694/5582/374	13
hsa00480	Glutathione metabolism	9/1135	57/8577	0.338761	0.62407	0.460852	2539/2878/27306/2938/124975/3417/2941/2953/6241	9
hsa05167	Kaposi sarcoma-associated herpesvirus infection	28/1135	194/8577	0.339878	0.62407	0.460852	3133/3106/3134/3107/3105/5294/3135/6850/1234/3710/131450/4277/1233/1232/2921/718/2784/6300/51176/1021/4776/5336/4609/5600/94235/163688/3569/2919	28
hsa05218	Melanoma	11/1135	72/8577	0.353258	0.644993	0.476303	3082/4286/4233/1950/3479/2246/1021/2254/2253/8822/26291	11
hsa00360	Phenylalanine metabolism	3/1135	16/8577	0.35693	0.648058	0.478566	222/314/3242	3
hsa00900	Terpenoid backbone biosynthesis	4/1135	23/8577	0.362855	0.650828	0.480612	2224/4597/3422/39	4
hsa00053	Ascorbate and aldarate metabolism	5/1135	30/8577	0.364464	0.650828	0.480612	79799/7363/54490/54578/55586	5
hsa00630	Glyoxylate and dicarboxylate metabolism	5/1135	30/8577	0.364464	0.650828	0.480612	125061/189/39/2731/51179	5
hsa04371	Apelin signaling pathway	20/1135	139/8577	0.379586	0.674127	0.497817	10891/4846/5294/91807/111/5563/3710/5330/114/2784/5346/107/6261/8877/85366/6543/94235/185/163688/5140	20
hsa05130	Pathogenic Escherichia coli infection	28/1135	198/8577	0.382724	0.676007	0.499205	834/57121/114548/2147/653857/7099/7100/7124/9368/3071/3553/356/79784/6300/84617/10383/347733/7280/9170/149461/5600/147945/10382/1366/10381/9075/3569/2846	28
hsa05235	PD-L1 expression and PD-1 checkpoint pathway in cancer	13/1135	89/8577	0.396305	0.696212	0.514126	1950/7099/919/29126/920/5133/916/3932/917/6300/5600/238/5588	13
hsa05214	Glioma	11/1135	75/8577	0.406526	0.710328	0.52455	815/7039/1950/5578/3479/1021/8536/5336/399694/5582/163688	11
hsa04621	NOD-like receptor signaling pathway	26/1135	186/8577	0.413496	0.718643	0.53069	834/2634/115361/114548/260434/330/6347/114769/3710/7099/22861/596/7124/5330/1536/3553/2921/6352/222545/6300/7128/5600/9051/3569/1669/2919	26
hsa00514	Other types of O-glycan biosynthesis	7/1135	47/8577	0.431278	0.745561	0.550568	51809/442117/79623/50614/8704/23127/57452	7
hsa04152	AMPK signaling pathway	17/1135	121/8577	0.435057	0.748115	0.552454	10891/5208/5521/5563/948/3479/84699/81617/5522/126129/5105/1149/5106/2194/6517/3952/9370	17
hsa00130	Ubiquinone and other terpenoid-quinone biosynthesis	2/1135	11/8577	0.438189	0.749535	0.553502	1728/3242	2
hsa04668	TNF signaling pathway	16/1135	114/8577	0.441127	0.750608	0.554295	330/6347/84699/1435/7124/3553/2921/6352/6374/4323/6300/7128/5600/8809/3569/2919	16
hsa05165	Human papillomavirus infection	45/1135	331/8577	0.446697	0.75362	0.556519	7143/3133/3106/3134/526/3107/3105/1740/3918/84612/3135/5521/1950/63923/256076/84699/7124/9368/81029/5522/356/7484/5649/1280/10319/84667/525/1021/7480/11211/54361/7475/3908/7474/3381/10297/3910/3674/8313/55502/284217/3696/7472/1311/3371	45
hsa04922	Glucagon signaling pathway	15/1135	107/8577	0.447534	0.75362	0.556519	5160/5260/10891/815/5563/3710/84699/5330/126129/5105/5106/2645/163688/5140/2642	15
hsa00561	Glycerolipid metabolism	9/1135	63/8577	0.457682	0.766734	0.566204	1056/119548/3990/8513/5406/129642/80339/5408/9388	9
hsa00785	Lipoic acid metabolism	3/1135	19/8577	0.46924	0.782067	0.577526	5160/116285/2731	3
hsa04710	Circadian rhythm	5/1135	34/8577	0.474567	0.784249	0.579138	6097/5563/4862/6095/6096	5
hsa04810	Regulation of actin cytoskeleton	31/1135	229/8577	0.475375	0.784249	0.579138	729/91807/57121/2147/1950/3683/10451/653857/3684/730/2246/3071/79784/3681/7410/735/50649/87/2254/9170/2253/85366/8822/10297/3674/26291/5881/128239/3696/623/2846	31
hsa04218	Cellular senescence	21/1135	156/8577	0.502345	0.82323	0.607924	3133/3106/3134/3107/3105/291/3135/3710/3552/6300/7042/1021/4776/4605/4609/5600/983/9133/163688/2626/3569	21
hsa01524	Platinum drug resistance	10/1135	73/8577	0.505244	0.82323	0.607924	5366/330/596/2938/1244/356/1317/2941/2953/332	10
hsa05171	Coronavirus disease - COVID-19	31/1135	232/8577	0.506603	0.82323	0.607924	834/629/729/114548/2147/2266/6850/6347/5578/7099/51284/6123/7124/6403/1536/730/3553/3593/718/2244/2243/6300/735/5336/1440/5600/5582/4312/185/3569/4153	31
hsa04666	Fc gamma R-mediated phagocytosis	13/1135	97/8577	0.52589	0.844327	0.623503	5788/3635/6850/10451/5578/653857/2213/7410/5336/65108/8877/5582/283748	13
hsa00040	Pentose and glucuronate interconversions	5/1135	36/8577	0.52738	0.844327	0.623503	79799/7363/54490/54578/27294	5
hsa00500	Starch and sucrose metabolism	5/1135	36/8577	0.52738	0.844327	0.623503	5167/3099/8908/2645/5169	5
hsa00532	Glycosaminoglycan biosynthesis - chondroitin sulfate / dermatan sulfate	3/1135	21/8577	0.539016	0.854525	0.631034	55790/337876/92126	3
hsa01230	Biosynthesis of amino acids	10/1135	75/8577	0.541443	0.854525	0.631034	2875/229/8277/875/586/162417/3417/5831/26227/445	10
hsa01522	Endocrine resistance	13/1135	98/8577	0.541638	0.854525	0.631034	111/3479/596/2852/114/6300/107/28514/399694/5600/638/10683/1565	13
hsa04961	Endocrine and other factor-regulated calcium reabsorption	7/1135	53/8577	0.563534	0.880833	0.650461	3816/480/5578/5330/1759/5582/6543	7
hsa05162	Measles	18/1135	138/8577	0.564921	0.880833	0.650461	3560/3718/7099/51284/596/3561/6504/3553/3593/916/356/2213/3552/917/1021/7128/7161/3569	18
hsa05222	Small cell lung cancer	12/1135	92/8577	0.568382	0.880833	0.650461	3918/5915/79444/330/596/10319/1021/3908/4609/3910/3674/284217	12
hsa04068	FoxO signaling pathway	17/1135	131/8577	0.574188	0.880833	0.650461	6648/100132074/114907/2911/1950/5563/3479/356/6300/7042/5105/5106/5347/5600/6517/9133/3569	17
hsa04114	Oocyte meiosis	17/1135	131/8577	0.574188	0.880833	0.650461	815/111/3710/3479/114/6300/991/107/286151/5347/5600/983/699/9133/5241/163688/27127	17
hsa00020	Citrate cycle (TCA cycle)	4/1135	30/8577	0.574574	0.880833	0.650461	5160/3417/5105/5106	4
hsa01232	Nucleotide metabolism	11/1135	85/8577	0.580514	0.88576	0.6541	151531/272/5167/284958/3614/7298/4907/6241/7083/122481/5169	11
hsa04912	GnRH signaling pathway	12/1135	93/8577	0.584205	0.887228	0.655184	815/5578/111/3710/5330/114/4323/6300/107/5600/163688/283748	12
hsa04917	Prolactin signaling pathway	9/1135	70/8577	0.590682	0.892891	0.659366	1154/5618/6300/1447/399694/5600/7054/2645/5617	9
hsa04973	Carbohydrate digestion and absorption	6/1135	47/8577	0.602887	0.899944	0.664574	480/6518/5330/3099/6523/3938	6
hsa00515	Mannose type O-glycan biosynthesis	3/1135	23/8577	0.603215	0.899944	0.664574	146664/8704/27087	3
hsa05415	Diabetic cardiomyopathy	26/1135	203/8577	0.603679	0.899944	0.664574	5160/1349/5164/4846/815/4694/1339/2539/291/5578/948/183/5350/5330/1536/1215/6300/7042/7137/5600/6517/5582/125965/5166/185/5972	26
hsa00604	Glycosphingolipid biosynthesis - ganglio series	2/1135	15/8577	0.609193	0.899944	0.664574	2583/6489	2
hsa00730	Thiamine metabolism	2/1135	15/8577	0.609193	0.899944	0.664574	249/122481	2
hsa00280	Valine, leucine and isoleucine degradation	6/1135	48/8577	0.624158	0.917879	0.677819	54511/18/586/65985/39/64064	6
hsa00052	Galactose metabolism	4/1135	32/8577	0.627528	0.918678	0.678408	3099/8704/2645/3938	4
hsa04919	Thyroid hormone signaling pathway	15/1135	121/8577	0.64837	0.940557	0.694565	117247/5208/480/5578/10231/5350/5330/1735/7068/54361/5336/4609/5582/1734/2626	15
hsa04926	Relaxin signaling pathway	16/1135	129/8577	0.649735	0.940557	0.694565	4846/5578/111/84699/5330/2769/114/2784/6300/51289/107/399694/5600/4322/4312/94235	16
hsa05135	Yersinia infection	17/1135	137/8577	0.651155	0.940557	0.694565	834/114548/64283/6347/10451/653857/7099/3937/7124/920/3553/3932/7410/6300/5600/5881/3569	17
hsa00330	Arginine and proline metabolism	6/1135	50/8577	0.664664	0.953689	0.704263	4846/2628/8659/5831/79814/283208	6
hsa04530	Tight junction	21/1135	170/8577	0.66805	0.953689	0.704263	11346/1740/57530/84612/5521/911/653857/5563/913/9368/910/5522/79784/909/87/150084/149461/58494/1366/9075/2626	21
hsa00513	Various types of N-glycan biosynthesis	5/1135	42/8577	0.66905	0.953689	0.704263	11320/57134/338707/8704/64377	5
hsa00051	Fructose and mannose metabolism	4/1135	34/8577	0.676074	0.954717	0.705022	3795/5208/229/3099	4
hsa05221	Acute myeloid leukemia	8/1135	67/8577	0.677174	0.954717	0.705022	5467/3684/1436/929/2322/51176/4609/4353	8
hsa00910	Nitrogen metabolism	2/1135	17/8577	0.678583	0.954717	0.705022	767/759	2
hsa00061	Fatty acid biosynthesis	2/1135	18/8577	0.70933	0.97905	0.72299	51703/2194	2
hsa00062	Fatty acid elongation	3/1135	27/8577	0.712799	0.97905	0.72299	79993/284486/83401	3
hsa01040	Biosynthesis of unsaturated fatty acids	3/1135	27/8577	0.712799	0.97905	0.72299	79993/83401/570	3
hsa04914	Progesterone-mediated oocyte maturation	12/1135	102/8577	0.713402	0.97905	0.72299	111/3479/114/6300/107/5347/5600/983/699/9133/5241/5140	12
hsa00590	Arachidonic acid metabolism	7/1135	61/8577	0.713953	0.97905	0.72299	27306/59344/5742/26279/242/247/283748	7
hsa04213	Longevity regulating pathway - multiple species	7/1135	61/8577	0.713953	0.97905	0.72299	6648/111/5563/3479/114/3170/107	7
hsa04722	Neurotrophin signaling pathway	14/1135	119/8577	0.722837	0.987067	0.728911	815/6272/596/356/4908/398/6300/5336/399694/5600/4915/7161/627/163688	14
hsa05022	Pathways of neurodegeneration - multiple diseases	59/1135	476/8577	0.730884	0.993879	0.733942	7222/1349/815/4694/1339/291/6622/2878/2911/9627/5578/3710/2890/1435/596/7124/5330/27019/7802/1536/3553/81029/356/27123/2892/3552/7484/4741/6531/6300/84617/10383/2081/347733/3800/7480/7280/2906/11211/54361/7475/4137/22943/5600/6261/7474/5582/10382/774/125965/50507/10297/8313/10381/627/7472/163688/3569/7345	59
hsa04620	Toll-like receptor signaling pathway	12/1135	104/8577	0.738374	0.999881	0.738374	23643/7099/51284/7100/7124/3553/929/3593/6352/6300/5600/3569	12
hsa04392	Hippo signaling pathway - multiple species	3/1135	29/8577	0.758105	1	0.738462	166824/79981/122786	3
hsa00920	Sulfur metabolism	1/1135	10/8577	0.758346	1	0.738462	9060	1
hsa00670	One carbon pool by folate	2/1135	20/8577	0.763444	1	0.738462	7298/10840	2
hsa00562	Inositol phosphate metabolism	8/1135	73/8577	0.767443	1	0.738462	5294/3635/5330/23007/138429/5336/9651/55586	8
hsa01200	Carbon metabolism	13/1135	115/8577	0.769903	1	0.738462	5160/2875/2539/229/3099/8277/3417/26227/189/39/2731/2645/51179	13
hsa00030	Pentose phosphate pathway	3/1135	30/8577	0.778498	1	0.738462	2539/229/8277	3
hsa00591	Linoleic acid metabolism	3/1135	30/8577	0.778498	1	0.738462	1576/26279/283748	3
hsa04110	Cell cycle	18/1135	157/8577	0.77865	1	0.738462	9184/7042/8317/1021/81620/991/9319/9212/4609/90381/5347/10403/983/1028/699/2810/9133/27127	18
hsa01212	Fatty acid metabolism	6/1135	57/8577	0.783451	1	0.738462	79993/51703/126129/2194/39/83401	6
hsa04146	Peroxisome	9/1135	83/8577	0.786641	1	0.738462	6648/54511/51555/51703/11001/3417/189/51179/570	9
hsa00520	Amino sugar and nucleotide sugar metabolism	5/1135	49/8577	0.794979	1	0.738462	3099/27159/5973/51700/2645	5
hsa05213	Endometrial cancer	6/1135	58/8577	0.797475	1	0.738462	1950/29119/51176/4609/10297/8313	6
hsa04216	Ferroptosis	4/1135	41/8577	0.810257	1	0.738462	4891/30061/51703/1536	4
hsa05219	Bladder cancer	4/1135	41/8577	0.810257	1	0.738462	1950/7380/4609/4312	4
hsa04910	Insulin signaling pathway	15/1135	137/8577	0.820871	1	0.738462	5260/79660/10891/5563/3099/5105/5106/2194/399694/5792/6517/5577/2645/163688/5140	15
hsa05322	Systemic lupus erythematosus	15/1135	137/8577	0.820871	1	0.738462	3113/3115/3111/729/3117/3122/3108/959/3119/1511/7124/730/718/735/87	15
hsa00380	Tryptophan metabolism	4/1135	42/8577	0.825121	1	0.738462	23498/125061/39/1543	4
hsa00270	Cysteine and methionine metabolism	5/1135	52/8577	0.835963	1	0.738462	27232/875/586/1788/26227	5
hsa04150	mTOR signaling pathway	17/1135	156/8577	0.838539	1	0.738462	526/5578/5563/3479/7124/81617/81029/7484/525/7480/11211/54361/7475/7474/8140/5582/7472	17
hsa00860	Porphyrin metabolism	4/1135	43/8577	0.839008	1	0.738462	79799/7363/54490/54578	4
hsa04211	Longevity regulating pathway	9/1135	89/8577	0.849758	1	0.738462	6648/10891/111/5563/3479/84699/114/107/9370	9
hsa05132	Salmonella infection	28/1135	249/8577	0.850097	1	0.738462	834/23643/5294/5788/114548/330/653857/7099/596/7100/7124/399/3071/3553/929/6300/51176/84617/10383/347733/3800/7280/4609/5600/10382/2318/10381/3569	28
hsa04962	Vasopressin-regulated water reabsorption	4/1135	44/8577	0.851957	1	0.738462	84699/361/398/359	4
hsa05017	Spinocerebellar ataxia	15/1135	143/8577	0.866338	1	0.738462	7222/291/2911/5578/3710/2890/5330/2892/5649/2081/6095/2906/116444/6261/5582	15
hsa00592	alpha-Linolenic acid metabolism	2/1135	26/8577	0.876459	1	0.738462	26279/283748	2
hsa05020	Prion disease	30/1135	272/8577	0.883106	1	0.738462	1349/4694/729/1339/291/3710/84699/7124/1536/730/3553/6352/3552/6300/735/84617/10383/347733/3800/7280/2906/116444/5600/6261/10382/774/125965/10381/3569/4685	30
hsa01250	Biosynthesis of nucleotide sugars	3/1135	37/8577	0.884604	1	0.738462	3099/2645/55586	3
hsa04932	Non-alcoholic fatty liver disease	16/1135	155/8577	0.887653	1	0.738462	1349/4694/1339/5563/7124/3553/356/3552/6300/2081/5600/125965/51085/3569/3952/9370	16
hsa00790	Folate biosynthesis	2/1135	27/8577	0.889552	1	0.738462	249/7054	2
hsa04217	Necroptosis	16/1135	159/8577	0.908759	1	0.738462	90865/834/815/291/114548/330/3718/7099/596/7124/1536/3553/356/3552/7128/283748	16
hsa05215	Prostate cancer	9/1135	97/8577	0.909828	1	0.738462	7039/1950/3479/84699/596/6716/51176/2119/7850	9
hsa00450	Selenocompound metabolism	1/1135	17/8577	0.910675	1	0.738462	9060	1
hsa00565	Ether lipid metabolism	4/1135	50/8577	0.912392	1	0.738462	122618/26279/7368/283748	4
hsa05110	Vibrio cholerae infection	4/1135	50/8577	0.912392	1	0.738462	526/5578/525/5336	4
hsa05231	Choline metabolism in cancer	9/1135	98/8577	0.915672	1	0.738462	5900/9468/1950/5578/80736/5582/6581/5881/283748	9
hsa05203	Viral carcinogenesis	21/1135	204/8577	0.916642	1	0.738462	3133/3106/3134/3107/3105/3135/5366/6850/1234/3718/9734/84699/1233/1232/1959/3249/718/87/1021/991/983	21
hsa00564	Glycerophospholipid metabolism	9/1135	99/8577	0.921191	1	0.738462	55224/122618/2819/9468/64850/26279/43/129642/283748	9
hsa05034	Alcoholism	19/1135	188/8577	0.921663	1	0.738462	84254/111/9734/4852/6571/84699/6570/6531/2784/2906/116444/399694/4915/84152/1812/7054/627/94235/163688	19
hsa05161	Hepatitis B	16/1135	162/8577	0.922356	1	0.738462	5578/3718/7099/84699/596/7124/1959/356/6300/7042/4776/4609/5600/5582/332/3569	16
hsa00511	Other glycan degradation	1/1135	18/8577	0.922519	1	0.738462	129807	1
hsa04210	Apoptosis	13/1135	136/8577	0.924837	1	0.738462	1521/5366/330/3710/1439/596/7124/1520/356/2081/4001/332/63970	13
hsa00531	Glycosaminoglycan degradation	1/1135	19/8577	0.932794	1	0.738462	8372	1
hsa00510	N-Glycan biosynthesis	4/1135	53/8577	0.933438	1	0.738462	11320/57134/146664/8704	4
hsa04623	Cytosolic DNA-sensing pathway	6/1135	75/8577	0.943686	1	0.738462	90865/834/114548/3553/6352/3569	6
hsa04142	Lysosome	12/1135	132/8577	0.944976	1	0.738462	5476/427/79158/4891/6272/1521/1511/1520/8372/3988/6556/10053	12
hsa05212	Pancreatic cancer	6/1135	76/8577	0.948147	1	0.738462	5900/7039/1950/7042/1021/5881	6
hsa05012	Parkinson disease	27/1135	266/8577	0.949241	1	0.738462	1349/815/4891/4694/1339/291/6622/9627/111/3710/6571/6570/6531/84617/10383/2081/347733/3800/7280/4137/10382/125965/1812/7054/10381/163688/7345	27
hsa04070	Phosphatidylinositol signaling system	8/1135	97/8577	0.953803	1	0.738462	3635/117283/5578/3710/5330/5336/5582/163688	8
hsa03430	Mismatch repair	1/1135	23/8577	0.961964	1	0.738462	9156	1
hsa05010	Alzheimer disease	40/1135	384/8577	0.962743	1	0.738462	1349/4891/4694/1339/291/6622/3710/1435/7124/5330/1536/3553/81029/27123/3552/7484/23621/84617/10383/2081/347733/3800/7480/7280/2906/11211/54361/7475/4137/22943/7474/10382/125965/50507/10297/8313/10381/7472/163688/3569	40
hsa05216	Thyroid cancer	2/1135	37/8577	0.965478	1	0.738462	51176/4609	2
hsa05206	MicroRNAs in cancer	31/1135	310/8577	0.967602	1	0.738462	7143/23414/2744/90427/2065/4233/5578/63923/596/6624/1944/8091/1945/7042/1943/1021/3925/2146/1788/7431/5336/4609/399694/6541/5582/1946/10297/5243/3236/131405/3371	31
hsa05208	Chemical carcinogenesis - reactive oxygen species	21/1135	223/8577	0.969046	1	0.738462	1349/6648/3082/4694/1339/291/4233/1950/2938/23683/6300/65010/5600/2941/125965/50507/1728/2953/1572/1543/57412	21
hsa04144	Endocytosis	24/1135	250/8577	0.969581	1	0.738462	3133/3106/3134/3107/3105/84612/3135/3560/64411/1234/653857/3561/138429/23362/6011/1759/5662/3800/1601/155382/131890/2348/23624/6457	24
hsa04520	Adherens junction	7/1135	93/8577	0.970988	1	0.738462	5787/4233/29119/51176/87/5792/5881	7
hsa03083	Polycomb repressive complex	6/1135	84/8577	0.97384	1	0.738462	80816/57332/84733/2146/26053/9212	6
hsa01240	Biosynthesis of cofactors	13/1135	153/8577	0.974625	1	0.738462	79799/7363/23498/54490/54578/23057/249/586/93100/125061/1728/3242/122481	13
hsa00310	Lysine degradation	4/1135	63/8577	0.974647	1	0.738462	56950/23127/2146/39	4
hsa03250	Viral life cycle - HIV-1	4/1135	63/8577	0.974647	1	0.738462	140564/1234/4130/920	4
hsa05100	Bacterial invasion of epithelial cells	5/1135	77/8577	0.981173	1	0.738462	4233/653857/29119/1759/399694	5
hsa04714	Thermogenesis	21/1135	232/8577	0.981546	1	0.738462	1349/10891/4694/1339/152831/111/5563/51703/84699/5592/114/126129/6300/116228/8193/5346/107/5600/125965/26291/1268	21
hsa05211	Renal cell carcinoma	4/1135	69/8577	0.986222	1	0.738462	3082/7039/4233/7042	4
hsa04622	RIG-I-like receptor signaling pathway	4/1135	71/8577	0.988805	1	0.738462	7124/3593/6300/5600	4
hsa00640	Propanoate metabolism	1/1135	32/8577	0.989444	1	0.738462	18	1
hsa04130	SNARE interactions in vesicular transport	1/1135	33/8577	0.990846	1	0.738462	6809	1
hsa04330	Notch signaling pathway	3/1135	62/8577	0.99196	1	0.738462	7088/28514/10683	3
hsa05220	Chronic myeloid leukemia	4/1135	76/8577	0.993395	1	0.738462	7042/1021/4609/399694	4
hsa05160	Hepatitis C	11/1135	158/8577	0.99606	1	0.738462	5521/1950/7124/5522/356/1021/949/149461/4609/1366/9075	11
hsa05131	Shigellosis	20/1135	247/8577	0.996083	1	0.738462	834/100132074/114548/653857/3710/7099/596/7100/7124/5330/3553/3099/929/6352/718/6300/87/5336/5600/5588	20
hsa03022	Basal transcription factors	1/1135	45/8577	0.998347	1	0.738462	54457	1
hsa03050	Proteasome	1/1135	46/8577	0.998567	1	0.738462	5696	1
hsa05016	Huntington disease	24/1135	306/8577	0.999049	1	0.738462	1349/6648/10891/4694/1339/291/2878/2890/84699/5330/27019/7802/2892/84617/10383/2081/347733/3800/7280/10382/774/125965/10381/627	24
hsa04120	Ubiquitin mediated proteolysis	8/1135	142/8577	0.999086	1	0.738462	26232/79444/330/27338/991/326/11065/23624	8
hsa00190	Oxidative phosphorylation	7/1135	134/8577	0.999354	1	0.738462	526/1349/4694/1339/525/125965/495	7
hsa04137	Mitophagy - animal	2/1135	72/8577	0.999579	1	0.738462	4286/7942	2
hsa05014	Amyotrophic lateral sclerosis	28/1135	364/8577	0.999754	1	0.738462	1349/834/4694/1339/2066/2878/3084/3710/2890/596/7124/145957/27019/7802/4741/6300/84617/10383/2081/347733/3800/7280/2906/91181/5600/10382/125965/10381	28
hsa03018	RNA degradation	2/1135	79/8577	0.999832	1	0.738462	154197/3329	2
hsa03015	mRNA surveillance pathway	3/1135	97/8577	0.999878	1	0.738462	5521/5522/56903	3
hsa04140	Autophagy - animal	5/1135	141/8577	0.999981	1	0.738462	5563/596/2081/118471/5588	5
hsa03013	Nucleocytoplasmic transport	2/1135	108/8577	0.999996	1	0.738462	91181/1917	2
hsa04141	Protein processing in endoplasmic reticulum	5/1135	170/8577	0.999999	1	0.738462	26232/57134/596/2081/79748	5
hsa03082	ATP-dependent chromatin remodeling	1/1135	117/8577	1	1	0.738462	8193	1
hsa03008	Ribosome biogenesis in eukaryotes	2/1135	164/8577	1	1	0.738462	10799/345630	2
hsa03010	Ribosome	1/1135	167/8577	1	1	0.738462	6123	1
hsa04740	Olfactory transduction	12/1135	439/8577	1	1	0.738462	815/5137/5997/5136/5592/4993/1261/5138/26212/6543/163688/3000	12

## Sheet: Table S5
1517 differential GO pathways between high- and low-risk groups
ONTOLOGY	ID	Description	GeneRatio	BgRatio	pvalue	p.adjust	qvalue	geneID	Count
BP	GO:0019221	cytokine-mediated signaling pathway	59/266	496/18903	1.03447e-37	3.97651e-34	2.27148e-34	DUOX2/CCL19/CX3CR1/IL33/CCL2/TNFSF18/CD74/CSF1/PRLR/CSF3R/CSF2RA/PTPRC/XCR1/CSF1R/IL1B/CCL7/IL2RB/CCR9/CCL16/TNF/CTSG/CCR5/IL1A/CXCR6/CCL11/XCL1/GREM2/CXCL8/CCL18/CCL22/TNFRSF13C/MMP12/CSF3/WNT5A/TNFAIP3/ACKR3/CCL20/IL31RA/IL23R/TNFSF13B/CCRL2/IL36G/IL37/EPO/LEP/CXCR2/IL6/ISG15/CD70/CXCL3/IL13RA2/THPO/CXCL11/CXCL1/TNFRSF19/PPBP/CNTFR/CXCL9/IFNE	59
BP	GO:0060326	cell chemotaxis	48/266	319/18903	2.01923e-35	3.88097e-32	2.21691e-32	CCL19/CX3CR1/HGF/CCL2/TNFSF18/CD74/CSF1/CSF3R/PIK3CG/VAV3/XCR1/CSF1R/IL1B/CCL7/CCR9/CCL16/TNFSF14/CTSG/CCR5/RAC2/CXCR6/CXCL14/CCL11/XCL1/SCG2/CXCL8/CCL18/CCL22/WNT5A/ACKR3/VEGFC/CCL20/SFTPD/CCRL2/PTN/AZU1/CXCR2/IL6/CXCL3/S100A9/CXCL11/CXCL1/PPBP/PRKCQ/CXCL9/S100A12/CHGA/FGF16	48
BP	GO:0050900	leukocyte migration	48/266	398/18903	7.18134e-31	9.20168e-28	5.25623e-28	CCL19/CX3CR1/IL33/CCL2/TNFSF18/CD74/CSF1/CSF3R/TACR1/PIK3CG/VAV3/CSF1R/IL1B/CCL7/CCL16/TNF/TNFSF14/CTSG/CCR5/RAC2/IL1A/CCL11/XCL1/SCG2/MMP9/CXCL8/CCL18/CCL22/ARTN/WNT5A/VEGFC/CCL20/PRTN3/SFTPD/PTN/AZU1/APOD/LEP/CXCR2/IL6/CXCL3/S100A9/CXCL11/CXCL1/PPBP/CXCL9/S100A12/CHGA	48
BP	GO:0030595	leukocyte chemotaxis	39/266	240/18903	3.93354e-30	3.78014e-27	2.15931e-27	CCL19/CX3CR1/CCL2/TNFSF18/CD74/CSF1/CSF3R/PIK3CG/VAV3/CSF1R/IL1B/CCL7/CCL16/TNFSF14/CTSG/CCR5/RAC2/CCL11/XCL1/SCG2/CXCL8/CCL18/CCL22/WNT5A/VEGFC/CCL20/SFTPD/PTN/AZU1/CXCR2/IL6/CXCL3/S100A9/CXCL11/CXCL1/PPBP/CXCL9/S100A12/CHGA	39
BP	GO:0032103	positive regulation of response to external stimulus	48/266	464/18903	8.15504e-28	6.2696e-25	3.58135e-25	COLEC10/HLA-E/CCL19/CX3CR1/C3/IL33/TNFSF18/CD74/CSF1/NCR3/SH2D1B/PIK3CG/NTF3/CD14/CSF1R/PRKCA/BTK/PTGER3/IL1B/NPY/CCL7/TLR7/AGT/TNF/TNFSF14/RAC2/SH2D1A/XCL1/SCG2/CXCL8/MMP12/ARTN/WNT5A/PTGS2/VEGFC/PLA2G2A/FGF10/PTN/AZU1/CXCR2/IL6/PGC/TNFSF4/S100A9/MBL2/S100A12/FABP4/FGF16	48
BP	GO:0097529	myeloid leukocyte migration	37/266	242/18903	1.26598e-27	8.1107e-25	4.63304e-25	CCL19/CX3CR1/CCL2/TNFSF18/CD74/CSF1/CSF3R/PIK3CG/VAV3/CSF1R/IL1B/CCL7/CCL16/CTSG/RAC2/IL1A/CCL11/XCL1/SCG2/CXCL8/CCL18/CCL22/VEGFC/CCL20/PRTN3/SFTPD/AZU1/CXCR2/IL6/CXCL3/S100A9/CXCL11/CXCL1/PPBP/CXCL9/S100A12/CHGA	37
BP	GO:0070663	regulation of leukocyte proliferation	38/266	269/18903	4.71575e-27	2.58962e-24	1.47925e-24	HLA-E/CCL19/SDC4/CD40/HLA-A/IL33/TNFSF18/TNFSF8/CD74/HLA-DPA1/CSF1/PRLR/CSF2RA/TACR1/VAV3/PTPRC/CSF1R/BTK/IL1B/RAC2/IGF1/IL1A/CD40LG/XCL1/GAL/TNFRSF13C/TFRC/TNFAIP3/SFTPD/IL23R/TNFSF13B/FGF10/EPO/LEP/IL6/CD70/TNFSF4/PRKCQ	38
BP	GO:0070661	leukocyte proliferation	41/266	348/18903	5.38375e-26	2.58689e-23	1.4777e-23	HLA-E/CCL19/SDC4/CD40/HLA-A/IL33/TNFSF18/TNFSF8/CD74/HLA-DPA1/CSF1/PRLR/CSF2RA/TACR1/PIK3CG/VAV3/PTPRC/CSF1R/BTK/IL1B/TNFSF14/RAC2/IGF1/IL1A/CD40LG/XCL1/GAL/TNFRSF13C/TFRC/TNFAIP3/SFTPD/IL23R/TNFSF13B/FGF10/EPO/LEP/IL6/CD70/TNFSF4/PRKCQ/IFNE	41
BP	GO:0070665	positive regulation of leukocyte proliferation	31/266	167/18903	6.30341e-26	2.69226e-23	1.53788e-23	HLA-E/CCL19/CD40/HLA-A/CD74/HLA-DPA1/CSF1/PRLR/CSF2RA/TACR1/VAV3/PTPRC/CSF1R/BTK/IL1B/RAC2/IGF1/IL1A/CD40LG/XCL1/TNFRSF13C/TFRC/IL23R/TNFSF13B/FGF10/EPO/LEP/IL6/CD70/TNFSF4/PRKCQ	31
BP	GO:0097530	granulocyte migration	30/266	158/18903	2.00517e-25	7.35063e-23	4.19887e-23	CCL19/CCL2/TNFSF18/CD74/CSF1/CSF3R/PIK3CG/VAV3/CSF1R/IL1B/CCL7/CCL16/RAC2/IL1A/CCL11/XCL1/SCG2/CXCL8/CCL18/CCL22/CCL20/PRTN3/CXCR2/CXCL3/S100A9/CXCL11/CXCL1/PPBP/CXCL9/S100A12	30
BP	GO:0071621	granulocyte chemotaxis	28/266	130/18903	2.10346e-25	7.35063e-23	4.19887e-23	CCL19/CCL2/TNFSF18/CD74/CSF1/CSF3R/PIK3CG/VAV3/CSF1R/IL1B/CCL7/CCL16/RAC2/CCL11/XCL1/SCG2/CXCL8/CCL18/CCL22/CCL20/CXCR2/CXCL3/S100A9/CXCL11/CXCL1/PPBP/CXCL9/S100A12	28
BP	GO:0006959	humoral immune response	39/266	320/18903	2.65045e-25	8.49026e-23	4.84985e-23	SEMG1/PI3/SLPI/COLEC10/HLA-E/REG3G/C3/HLA-A/FGA/CCL2/LTF/MASP1/IGHD/PTPRC/IL1B/TNF/CTSG/CAMP/CXCL14/SH2D1A/CXCL8/IGHG1/DEFA4/REG1A/PRTN3/SFTPD/SPINK5/AZU1/IL6/CXCL3/PGC/S100A9/MBL2/CXCL11/CXCL1/PPBP/CXCL9/S100A12/IFNE	39
BP	GO:0043410	positive regulation of MAPK cascade	46/266	496/18903	1.26104e-24	3.7288e-22	2.12998e-22	CCL19/CD40/HGF/FGA/CCL2/KL/TEK/PROK1/GPER1/CD74/PIK3CG/PTPRC/NTF3/CSF1R/PRKCA/IL1B/NPY/CCL7/CCL16/TNF/CALCR/IGF1/IL1A/GDF15/CCL11/XCL1/CCL18/CCL22/DKK1/WNT5A/IL11/ACKR3/CCL20/SEMA3A/PLA2G2A/FGF10/EPO/LEP/FGF21/NOX4/IL6/THPO/TNFRSF19/NODAL/S100A12/IAPP	46
BP	GO:0002697	regulation of immune effector process	41/266	379/18903	1.51725e-24	4.16593e-22	2.37968e-22	RBP4/COLEC10/HLA-E/CCL19/CX3CR1/CD40/CD1C/C3/HLA-A/AZGP1/IL33/HLA-B/TNFSF18/CD74/HLA-DRA/CD1E/NCR3/SH2D1B/PTPRC/CD1B/BTK/IL1B/TLR7/CD244/TNF/RAC2/NCR1/CD40LG/SH2D1A/XCL1/NR4A3/WNT5A/TFRC/IL23R/SPINK5/LEP/IL6/PGC/TNFSF4/IL13RA2/MBL2	41
BP	GO:0070098	chemokine-mediated signaling pathway	24/266	90/18903	2.45665e-24	6.29558e-22	3.59619e-22	CCL19/CX3CR1/CCL2/XCR1/CCL7/CCR9/CCL16/CCR5/CXCR6/CCL11/XCL1/CXCL8/CCL18/CCL22/ACKR3/CCL20/CCRL2/CXCR2/CXCL3/THPO/CXCL11/CXCL1/PPBP/CXCL9	24
BP	GO:0002699	positive regulation of immune effector process	35/266	261/18903	3.46788e-24	8.33157e-22	4.7592e-22	RBP4/COLEC10/HLA-E/CCL19/CD40/CD1C/C3/HLA-A/AZGP1/IL33/HLA-B/CD74/HLA-DRA/CD1E/NCR3/SH2D1B/PTPRC/CD1B/BTK/IL1B/TLR7/CD244/TNF/RAC2/SH2D1A/XCL1/NR4A3/WNT5A/TFRC/IL23R/IL6/PGC/TNFSF4/IL13RA2/MBL2	35
BP	GO:0032944	regulation of mononuclear cell proliferation	34/266	243/18903	3.91497e-24	8.85243e-22	5.05673e-22	HLA-E/CCL19/SDC4/CD40/HLA-A/TNFSF18/TNFSF8/CD74/HLA-DPA1/CSF1/PRLR/TACR1/VAV3/PTPRC/BTK/IL1B/RAC2/IGF1/IL1A/CD40LG/XCL1/GAL/TNFRSF13C/TFRC/SFTPD/IL23R/TNFSF13B/FGF10/EPO/LEP/IL6/CD70/TNFSF4/PRKCQ	34
BP	GO:0002443	leukocyte mediated immunity	44/266	463/18903	5.37301e-24	1.14744e-21	6.55445e-22	PTGDS/HLA-E/CX3CR1/CD40/CD1C/PTGDR/C3/HLA-A/AZGP1/HLA-B/CD74/HLA-DPA1/HLA-DRA/CD1E/NCR3/SH2D1B/IGHD/PIK3CG/PTPRC/CD1B/BTK/HLA-DQA1/IL1B/TNF/CTSG/RAC2/NCR1/CD40LG/SH2D1A/XCL1/IGHG1/NR4A3/TFRC/ULBP1/IL23R/ULBP3/AZU1/LEP/IL6/CD70/TNFSF4/IL13RA2/MBL2/CHGA	44
BP	GO:0032946	positive regulation of mononuclear cell proliferation	28/266	149/18903	1.16495e-23	2.35688e-21	1.34631e-21	HLA-E/CCL19/CD40/HLA-A/CD74/HLA-DPA1/CSF1/PRLR/TACR1/VAV3/PTPRC/BTK/IL1B/IGF1/IL1A/CD40LG/XCL1/TNFRSF13C/TFRC/IL23R/TNFSF13B/FGF10/EPO/LEP/IL6/CD70/TNFSF4/PRKCQ	28
BP	GO:0032943	mononuclear cell proliferation	37/266	312/18903	1.30196e-23	2.50236e-21	1.42941e-21	HLA-E/CCL19/SDC4/CD40/HLA-A/TNFSF18/TNFSF8/CD74/HLA-DPA1/CSF1/PRLR/TACR1/PIK3CG/VAV3/PTPRC/BTK/IL1B/TNFSF14/RAC2/IGF1/IL1A/CD40LG/XCL1/GAL/TNFRSF13C/TFRC/SFTPD/IL23R/TNFSF13B/FGF10/EPO/LEP/IL6/CD70/TNFSF4/PRKCQ/IFNE	37
BP	GO:1990868	response to chemokine	24/266	98/18903	2.32268e-23	4.05835e-21	2.31823e-21	CCL19/CX3CR1/CCL2/XCR1/CCL7/CCR9/CCL16/CCR5/CXCR6/CCL11/XCL1/CXCL8/CCL18/CCL22/ACKR3/CCL20/CCRL2/CXCR2/CXCL3/THPO/CXCL11/CXCL1/PPBP/CXCL9	24
BP	GO:1990869	cellular response to chemokine	24/266	98/18903	2.32268e-23	4.05835e-21	2.31823e-21	CCL19/CX3CR1/CCL2/XCR1/CCL7/CCR9/CCL16/CCR5/CXCR6/CCL11/XCL1/CXCL8/CCL18/CCL22/ACKR3/CCL20/CCRL2/CXCR2/CXCL3/THPO/CXCL11/CXCL1/PPBP/CXCL9	24
BP	GO:0050670	regulation of lymphocyte proliferation	33/266	239/18903	2.93321e-23	4.89061e-21	2.79364e-21	HLA-E/CCL19/SDC4/CD40/HLA-A/TNFSF18/TNFSF8/CD74/HLA-DPA1/PRLR/TACR1/VAV3/PTPRC/BTK/IL1B/RAC2/IGF1/IL1A/CD40LG/XCL1/GAL/TNFRSF13C/TFRC/SFTPD/IL23R/TNFSF13B/FGF10/EPO/LEP/IL6/CD70/TNFSF4/PRKCQ	33
BP	GO:0019730	antimicrobial humoral response	26/266	125/18903	3.05345e-23	4.89061e-21	2.79364e-21	SEMG1/PI3/SLPI/HLA-E/REG3G/HLA-A/FGA/LTF/CTSG/CAMP/CXCL14/CXCL8/DEFA4/REG1A/PRTN3/SFTPD/SPINK5/AZU1/CXCL3/PGC/S100A9/CXCL11/CXCL1/PPBP/CXCL9/S100A12	26
BP	GO:0046651	lymphocyte proliferation	36/266	305/18903	6.3929e-23	9.82972e-21	5.61498e-21	HLA-E/CCL19/SDC4/CD40/HLA-A/TNFSF18/TNFSF8/CD74/HLA-DPA1/PRLR/TACR1/PIK3CG/VAV3/PTPRC/BTK/IL1B/TNFSF14/RAC2/IGF1/IL1A/CD40LG/XCL1/GAL/TNFRSF13C/TFRC/SFTPD/IL23R/TNFSF13B/FGF10/EPO/LEP/IL6/CD70/TNFSF4/PRKCQ/IFNE	36
BP	GO:1990266	neutrophil migration	26/266	130/18903	8.93461e-23	1.32095e-20	7.54559e-21	CCL19/CCL2/CD74/CSF3R/PIK3CG/VAV3/IL1B/CCL7/CCL16/RAC2/IL1A/CCL11/XCL1/CXCL8/CCL18/CCL22/CCL20/PRTN3/CXCR2/CXCL3/S100A9/CXCL11/CXCL1/PPBP/CXCL9/S100A12	26
BP	GO:0050671	positive regulation of lymphocyte proliferation	27/266	146/18903	1.17783e-22	1.67688e-20	9.57874e-21	HLA-E/CCL19/CD40/HLA-A/CD74/HLA-DPA1/PRLR/TACR1/VAV3/PTPRC/BTK/IL1B/IGF1/IL1A/CD40LG/XCL1/TNFRSF13C/TFRC/IL23R/TNFSF13B/FGF10/EPO/LEP/IL6/CD70/TNFSF4/PRKCQ	27
BP	GO:0030593	neutrophil chemotaxis	24/266	106/18903	1.77957e-22	2.44309e-20	1.39555e-20	CCL19/CCL2/CD74/CSF3R/PIK3CG/VAV3/IL1B/CCL7/CCL16/RAC2/CCL11/XCL1/CXCL8/CCL18/CCL22/CCL20/CXCR2/CXCL3/S100A9/CXCL11/CXCL1/PPBP/CXCL9/S100A12	24
BP	GO:0045785	positive regulation of cell adhesion	42/266	484/18903	2.10493e-21	2.79012e-19	1.59379e-19	HLA-E/CCL19/SDC4/HLA-A/FGA/CCL2/TNFSF18/TEK/CD74/HLA-DPA1/HLA-DRA/CSF1/VAV3/PTPRC/PRKCA/HLA-DQA1/IL1B/NPY/TNF/TNFSF14/CTSG/IGF1/IL1A/CD40LG/XCL1/RAC3/TNFRSF13C/NR4A3/BMP7/WNT5A/CSPG5/TFRC/IL23R/TNFSF13B/AZU1/EPO/LEP/IL6/CD70/TNFSF4/NODAL/PRKCQ	42
BP	GO:0032496	response to lipopolysaccharide	36/266	339/18903	2.38215e-21	3.05232e-19	1.74356e-19	SLPI/CX3CR1/CCL2/LTF/CSF1/CD14/PRKCA/BTK/IL1B/TNF/CTSG/CCR5/CAMP/IL1A/NOS1/CXCL8/DEFA4/CSF3/WNT5A/PTGS2/TNFAIP3/IL23R/FGF10/IL36G/IL37/EPO/IL6/CXCL3/TNFSF4/S100A9/THPO/CXCL11/CXCL1/PPBP/MPO/CXCL9	36
BP	GO:0002237	response to molecule of bacterial origin	36/266	360/18903	1.8069e-20	2.24056e-18	1.27986e-18	SLPI/CX3CR1/CCL2/LTF/CSF1/CD14/PRKCA/BTK/IL1B/TNF/CTSG/CCR5/CAMP/IL1A/NOS1/CXCL8/DEFA4/CSF3/WNT5A/PTGS2/TNFAIP3/IL23R/FGF10/IL36G/IL37/EPO/IL6/CXCL3/TNFSF4/S100A9/THPO/CXCL11/CXCL1/PPBP/MPO/CXCL9	36
BP	GO:0001819	positive regulation of cytokine production	41/266	486/18903	1.88811e-20	2.26809e-18	1.29559e-18	HLA-E/CCL19/CD40/C3/HLA-A/NOX5/HGF/IL33/CD74/HLA-DPA1/IGHD/PIK3CG/PTPRC/ORM1/CD14/CSF1R/BTK/IL1B/TLR7/AGT/CD244/TNF/ITK/IL1A/CD40LG/XCL1/GDF2/MMP12/NR4A3/WNT5A/PTGS2/TNFRSF8/IL23R/AZU1/LEP/IL6/ISG15/TNFSF4/NODAL/PRKCQ/PAEP	41
BP	GO:0002460	adaptive immune response based on somatic recombination of immune receptors built from immunoglobulin superfamily domains	36/266	375/18903	7.0609e-20	8.22487e-18	4.69826e-18	HLA-E/CCL19/CD40/CD1C/C3/HLA-A/AZGP1/IL33/HLA-B/TNFSF18/CD74/HLA-DPA1/HLA-DRA/CD1E/IGHD/PTPRC/CD1B/BTK/HLA-DQA1/IL1B/RORC/TNF/CD40LG/XCL1/IGHG1/TFRC/TNFAIP3/IL23R/TNFSF13B/BACH2/IL6/CD70/TNFSF4/IL13RA2/MBL2/PRKCQ	36
BP	GO:0070374	positive regulation of ERK1 and ERK2 cascade	29/266	223/18903	8.29008e-20	9.37266e-18	5.3539e-18	CCL19/FGA/CCL2/TEK/GPER1/CD74/PTPRC/CSF1R/PRKCA/NPY/CCL7/CCL16/TNF/CALCR/IGF1/IL1A/CCL11/XCL1/CCL18/CCL22/ACKR3/CCL20/PLA2G2A/FGF10/EPO/FGF21/NOX4/THPO/NODAL	29
BP	GO:0001906	cell killing	27/266	189/18903	1.36168e-19	1.49551e-17	8.54273e-18	SEMG1/HLA-E/CX3CR1/CD1C/C3/HLA-A/AZGP1/HLA-B/LTF/HLA-DRA/CD1E/NCR3/PTPRC/CD1B/CTSG/NCR1/SH2D1A/XCL1/IGHG1/DEFA4/ULBP1/IL23R/ULBP3/AZU1/LEP/S100A12/CHGA	27
BP	GO:0002449	lymphocyte mediated immunity	35/266	367/18903	2.97053e-19	3.17187e-17	1.81185e-17	HLA-E/CD40/CD1C/C3/HLA-A/AZGP1/HLA-B/CD74/HLA-DPA1/HLA-DRA/CD1E/NCR3/SH2D1B/IGHD/PTPRC/CD1B/BTK/HLA-DQA1/IL1B/TNF/NCR1/CD40LG/SH2D1A/XCL1/IGHG1/TFRC/ULBP1/IL23R/ULBP3/LEP/IL6/CD70/TNFSF4/IL13RA2/MBL2	35
BP	GO:0002526	acute inflammatory response	22/266	114/18903	4.40179e-19	4.5731e-17	2.61227e-17	HLA-E/REG3G/C3/KL/TACR1/PIK3CG/ORM1/BTK/PTGER3/IL1B/NPY/TNF/IL1A/IGHG1/PTGS2/TFRC/IL31RA/EPO/CXCR2/IL6/TNFSF4/MBL2	22
BP	GO:0042742	defense response to bacterium	35/266	382/18903	1.07672e-18	1.08919e-16	6.22172e-17	SEMG1/PI3/SLPI/HLA-E/REG3G/HLA-A/GBP2/FGA/COLEC12/TNFSF8/LTF/IGHD/LCN2/IL1B/TNF/CTSG/CAMP/IGHG1/DEFA4/CCL20/SFTPD/IL23R/PLA2G2A/SPINK5/AZU1/IL6/ISG15/PGC/S100A9/MBL2/PPBP/MPO/S100A12/CHGA/IFNE	35
BP	GO:0002708	positive regulation of lymphocyte mediated immunity	22/266	119/18903	1.17205e-18	1.15522e-16	6.59892e-17	HLA-E/CD40/CD1C/C3/HLA-A/AZGP1/HLA-B/HLA-DRA/CD1E/NCR3/SH2D1B/PTPRC/CD1B/BTK/IL1B/TNF/SH2D1A/XCL1/TFRC/IL23R/IL6/TNFSF4	22
BP	GO:0007159	leukocyte cell-cell adhesion	36/266	414/18903	1.83546e-18	1.76388e-16	1.00757e-16	HLA-E/CCL19/CX3CR1/SDC4/HLA-A/CCL2/TNFSF18/CD74/HLA-DPA1/HLA-DRA/PTPRC/HLA-DQA1/IL1B/TNF/TNFSF14/CTSG/RAC2/IGF1/IL1A/CD40LG/XCL1/TNFRSF13C/NR4A3/BMP7/TFRC/SFTPD/IL23R/CLEC4M/TNFSF13B/EPO/LEP/IL6/CD70/TNFSF4/S100A9/PRKCQ	36
BP	GO:0070371	ERK1 and ERK2 cascade	33/266	340/18903	1.96708e-18	1.84426e-16	1.05349e-16	CCL19/FGA/CCL2/SEMA6A/TEK/GPER1/CD74/PTPRC/CSF1R/PRKCA/IL1B/NPY/CCL7/AGT/AVP/CCL16/TNF/CALCR/IGF1/IL1A/CCL11/XCL1/CCL18/CCL22/ACKR3/CCL20/PLA2G2A/FGF10/EPO/FGF21/NOX4/THPO/NODAL	33
BP	GO:0050920	regulation of chemotaxis	28/266	230/18903	2.2113e-18	2.02387e-16	1.15608e-16	CCL19/CX3CR1/CCL2/SEMA6A/TNFSF18/CD74/CSF1/NTF3/CSF1R/CCL7/TNFSF14/RAC2/SEMA3E/XCL1/SCG2/CXCL8/ARTN/WNT5A/VEGFC/SEMA3A/ROBO2/FGF10/PTN/AZU1/CXCR2/IL6/SEMA4G/FGF16	28
[truncated: 1,475 more rows]

## Sheet: Table S6
218 differential KEGG pathways between high- and low-risk groups
[truncated: 219 more rows]

## Sheet: Table S7
GSVA analysis of KEGG pathways for different risk groups
[truncated: 70 more rows]
[truncated: 30 more columns]

[truncated: 2 more sheets: Table S8, Table S9]
